# Supplementary material
Source: publisher figshare collection journal article supplement (https://acs.figshare.com/ndownloader/files/22090887)
Supplement: Supplementary file 1 [file 22090887]

## Sheet: DE_1vs1
ProteinGroup	Decoy	Quantity_1	Quantity_2	Quantity_3	Quantity_4	Quantity_5	Quantity_6	QValue
tr|K7ELR7|K7ELR7_HUMAN;tr|A0A2R8YF08|A0A2R8YF08_HUMAN	FALSE	4.98799e+06	4511237	4.04424e+06	4755134	4751465	4244672	0.00462606
tr|F8VZQ9|F8VZQ9_HUMAN;tr|H0YHG0|H0YHG0_HUMAN;sp|P82979|SARNP_HUMAN	FALSE	10714221	12347224	12555882	12214897	11452480	11018118	0.00462606
sp|O75340|PDCD6_HUMAN;sp|O75340-2|PDCD6_HUMAN	FALSE	13209712	9938389	11077851	12473210	13980187	15204259	0.00191571
tr|A0A0U1RRM4|A0A0U1RRM4_HUMAN;sp|P26599-3|PTBP1_HUMAN;sp|P26599-2|PTBP1_HUMAN;sp|P26599|PTBP1_HUMAN;tr|A6NLN1|A6NLN1_HUMAN	FALSE	13686584	21631654	25999302	26539144	28628802	31605892	0
tr|F5GZS6|F5GZS6_HUMAN;sp|P08195-3|4F2_HUMAN;sp|P08195-4|4F2_HUMAN;tr|J3KPF3|J3KPF3_HUMAN;sp|P08195-2|4F2_HUMAN;sp|P08195|4F2_HUMAN	FALSE	155070480	163643936	160099872	173437824	189447360	172613696	0
tr|A0A087WSY9|A0A087WSY9_HUMAN;tr|A0A182DWI3|A0A182DWI3_HUMAN;sp|Q16881-6|TRXR1_HUMAN;tr|E9PIR7|E9PIR7_HUMAN;tr|E2QRB9|E2QRB9_HUMAN;tr|E9PKD3|E9PKD3_HUMAN;sp|Q16881-5|TRXR1_HUMAN;sp|Q16881-7|TRXR1_HUMAN;sp|Q16881-2|TRXR1_HUMAN;sp|Q16881|TRXR1_HUMAN;sp|Q16881-3|TRXR1_HUMAN;tr|A0A087WSW9|A0A087WSW9_HUMAN;sp|Q16881-4|TRXR1_HUMAN;tr|F8W809|F8W809_HUMAN	FALSE	20089916	23718146	24561752	24548280	25607534	25701302	0
sp|Q00341|VIGLN_HUMAN;sp|Q00341-2|VIGLN_HUMAN;tr|C9JIZ1|C9JIZ1_HUMAN;tr|C9JHZ8|C9JHZ8_HUMAN;tr|C9JK79|C9JK79_HUMAN;tr|C9JES8|C9JES8_HUMAN;tr|C9J5E5|C9J5E5_HUMAN;tr|A0A024R4E5|A0A024R4E5_HUMAN;tr|C9JHS7|C9JHS7_HUMAN;tr|C9JZI8|C9JZI8_HUMAN;tr|C9JT62|C9JT62_HUMAN	FALSE	2534033	4029750	3.0394e+06	4606542	5462388	4.18651e+06	0.00241546
sp|P22695|QCR2_HUMAN;tr|H3BSJ9|H3BSJ9_HUMAN;tr|H3BRG4|H3BRG4_HUMAN	FALSE	5596154	10291951	11678888	9738342	14563549	16354356	0.00191571
tr|E9PCH5|E9PCH5_HUMAN;tr|E9PDE4|E9PDE4_HUMAN;sp|P20810-2|ICAL_HUMAN;tr|A0A0C4DGB5|A0A0C4DGB5_HUMAN;sp|P20810-3|ICAL_HUMAN;tr|E7EQA0|E7EQA0_HUMAN;tr|H0Y7F0|H0Y7F0_HUMAN;tr|A0A0A0MR45|A0A0A0MR45_HUMAN;sp|P20810-8|ICAL_HUMAN;tr|E7EQ12|E7EQ12_HUMAN;sp|P20810-5|ICAL_HUMAN;sp|P20810-10|ICAL_HUMAN;tr|H0YD33|H0YD33_HUMAN;sp|P20810-6|ICAL_HUMAN;tr|E7ES10|E7ES10_HUMAN;sp|P20810-7|ICAL_HUMAN;tr|H0Y9H6|H0Y9…	FALSE	11658424	10538695	8835514	6083133	8.01321e+06	7329798	0
sp|Q8NFI4|F10A5_HUMAN	FALSE	29437848	25076638	25465974	23885128	27006618	22723794	0.00241546
tr|C9JSQ1|C9JSQ1_HUMAN;sp|P12532-2|KCRU_HUMAN;tr|F8WCN3|F8WCN3_HUMAN;sp|P12532|KCRU_HUMAN	FALSE	9918893	7.72624e+06	6580415	7.28462e+06	9030658	7600677	0
tr|E7ERF2|E7ERF2_HUMAN	FALSE	7638484	13525536	13099965	11066961	12149153	11912749	0
tr|D6RAM1|D6RAM1_HUMAN;tr|D6RFM3|D6RFM3_HUMAN;tr|E7EQJ0|E7EQJ0_HUMAN;tr|D6RJ04|D6RJ04_HUMAN;tr|D6RIH9|D6RIH9_HUMAN;tr|D6R9T0|D6R9T0_HUMAN;tr|D6RDU3|D6RDU3_HUMAN	FALSE	25400000	23113064	23967724	26211414	28899588	21912488	0.00191571
tr|E7EWE5|E7EWE5_HUMAN;tr|A0A2R8YD50|A0A2R8YD50_HUMAN;tr|G5E9S2|G5E9S2_HUMAN;tr|A0A2R8Y7L2|A0A2R8Y7L2_HUMAN;sp|P51659-3|DHB4_HUMAN;tr|A0A2R8Y7W2|A0A2R8Y7W2_HUMAN;sp|P51659|DHB4_HUMAN;sp|P51659-2|DHB4_HUMAN;tr|E7ER27|E7ER27_HUMAN;tr|E7ET17|E7ET17_HUMAN	FALSE	435398	828189	1.01391e+06	1.47142e+06	1.74848e+06	1.52325e+06	0.00241546
sp|Q07020|RL18_HUMAN;tr|F8VUA6|F8VUA6_HUMAN;sp|Q07020-2|RL18_HUMAN;tr|H0YHA7|H0YHA7_HUMAN;tr|J3QQ67|J3QQ67_HUMAN	FALSE	5037059	10865727	11976478	9028708	12852456	11420373	0
sp|Q92526-2|TCPW_HUMAN	FALSE	44805220	32507044	25290132	29685358	34801924	32164242	0
tr|E5RH77|E5RH77_HUMAN	FALSE	77939248	79533256	78275872	82726144	80518528	75111424	0
sp|Q9NQH7-2|XPP3_HUMAN;sp|Q9NQH7-3|XPP3_HUMAN;sp|Q9NQH7|XPP3_HUMAN;sp|Q9NQH7-5|XPP3_HUMAN;sp|Q9NQH7-4|XPP3_HUMAN	FALSE	110480648	97879176	103620848	113049720	113080672	110068760	0
tr|A0A2R8YG21|A0A2R8YG21_HUMAN;tr|A0A2R8Y688|A0A2R8Y688_HUMAN;sp|P40939|ECHA_HUMAN;tr|H0YFD6|H0YFD6_HUMAN	FALSE	19138624	17206756	20272258	18019628	20900158	15647008	0.00241546
sp|P62263|RS14_HUMAN;tr|A0A2R8Y811|A0A2R8Y811_HUMAN	FALSE	57432956	49364916	47661956	74006616	52807512	60324764	0.00191571
sp|Q8TDB8-2|GTR14_HUMAN;sp|P11169|GTR3_HUMAN;sp|Q8TDB8|GTR14_HUMAN;sp|Q8TDB8-5|GTR14_HUMAN;sp|Q8TDB8-4|GTR14_HUMAN	FALSE	11398952	461624	95031720	123245088	127834808	4.21053e+06	0.00462606
sp|O75828|CBR3_HUMAN	FALSE	12299212	13138379	57293904	56166760	56659980	17928742	0.00241546
sp|P42765|THIM_HUMAN;tr|A0A0B4J2A4|A0A0B4J2A4_HUMAN	FALSE	13391563	12062596	13747122	13043945	11686447	15800319	0.00191571
sp|P30153|2AAA_HUMAN;tr|B3KQV6|B3KQV6_HUMAN;tr|H0YDG7|H0YDG7_HUMAN;sp|P30154-2|2AAB_HUMAN;sp|P30154-3|2AAB_HUMAN;sp|P30154-4|2AAB_HUMAN;sp|P30154|2AAB_HUMAN;sp|P30154-5|2AAB_HUMAN	FALSE	6859561	8537274	7747355	11775687	8453695	9801456	0.00191571
sp|P39656-2|OST48_HUMAN	FALSE	6012942	7289582	6.62076e+06	9198541	10552295	11787649	0
sp|P63092|GNAS2_HUMAN;tr|A0A087WZE5|A0A087WZE5_HUMAN;tr|Q5JWE9|Q5JWE9_HUMAN;sp|P19087|GNAT2_HUMAN;sp|A8MTJ3|GNAT3_HUMAN;tr|A0A1W2PS82|A0A1W2PS82_HUMAN;sp|P04899|GNAI2_HUMAN;sp|P63092-2|GNAS2_HUMAN;tr|Q5JWD1|Q5JWD1_HUMAN;sp|P38405|GNAL_HUMAN;sp|P09471-2|GNAO_HUMAN;tr|H0Y7E8|H0Y7E8_HUMAN;sp|P11488|GNAT1_HUMAN;sp|P08754|GNAI3_HUMAN;sp|P63092-4|GNAS2_HUMAN;sp|P38405-2|GNAL_HUMAN;tr|A0A1W2PQK2|A0A1W2P…	FALSE	22257004	16895564	18853380	17092200	18600478	16566186	0.00241546
sp|Q6NVV1|R13P3_HUMAN	FALSE	62132620	50918372	48956256	63776168	58327680	48749028	0
sp|P47813|IF1AX_HUMAN;sp|O14602|IF1AY_HUMAN;tr|X6RAC9|X6RAC9_HUMAN	FALSE	19962812	20877210	20846342	22335246	25595872	24699732	0
sp|Q13200-2|PSMD2_HUMAN;sp|Q13200|PSMD2_HUMAN;sp|Q13200-3|PSMD2_HUMAN	FALSE	20691888	29653686	28803772	25111928	31419108	31739792	0
sp|Q562R1|ACTBL_HUMAN	FALSE	676416704	469792160	580553856	563979392	563301888	266555104	0
sp|P62829|RL23_HUMAN	FALSE	17717718	15156724	16168707	17959916	17745450	18562514	0
sp|Q15717|ELAV1_HUMAN;sp|Q15717-2|ELAV1_HUMAN	FALSE	47870936	38442432	44519120	36594200	45350936	41834532	0.00241546
sp|Q14103-2|HNRPD_HUMAN;tr|H0YA96|H0YA96_HUMAN;sp|Q14103-4|HNRPD_HUMAN	FALSE	68015464	53392116	49095448	52146776	54324024	60933012	0
tr|F5GXH2|F5GXH2_HUMAN	FALSE	115902696	92543240	88912488	97837376	101331056	94330544	0
tr|H0Y449|H0Y449_HUMAN;tr|C9J5V9|C9J5V9_HUMAN;sp|P67809|YBOX1_HUMAN	FALSE	74910184	93119096	74749448	101820328	101776424	86890496	0.00191571
tr|E9PR30|E9PR30_HUMAN;sp|P62861|RS30_HUMAN	FALSE	64955384	53230544	52121676	56735188	57518248	51896364	0
sp|P14618-2|KPYM_HUMAN	FALSE	79736072	81321440	87598944	95268400	109863200	94093328	0
sp|P09493-3|TPM1_HUMAN;tr|A0A2R8YH90|A0A2R8YH90_HUMAN;tr|K7ENT6|K7ENT6_HUMAN;tr|F5H7S3|F5H7S3_HUMAN;tr|H0YNC7|H0YNC7_HUMAN;tr|Q6ZN40|Q6ZN40_HUMAN;tr|Q5TCU8|Q5TCU8_HUMAN;tr|A0A0S2Z4G6|A0A0S2Z4G6_HUMAN;tr|B7Z596|B7Z596_HUMAN;tr|H0YKX5|H0YKX5_HUMAN;tr|A7XZE4|A7XZE4_HUMAN;sp|P67936|TPM4_HUMAN;sp|P07951|TPM2_HUMAN;tr|H0YL80|H0YL80_HUMAN;sp|P09493-6|TPM1_HUMAN;tr|A0A2R8Y5V9|A0A2R8Y5V9_HUMAN;sp|P09493-1…	FALSE	42511720	31593370	37805500	37421928	35440948	36243680	0.00191571
tr|F8WCJ1|F8WCJ1_HUMAN;tr|C9J4W5|C9J4W5_HUMAN;tr|C9J7B5|C9J7B5_HUMAN;sp|Q9GZV4|IF5A2_HUMAN;sp|Q6IS14|IF5AL_HUMAN	FALSE	57175576	102985304	100527016	98889936	116375528	109215552	0
tr|D6R9B6|D6R9B6_HUMAN	FALSE	34878764	57370280	60647976	62809568	70911472	63735380	0
sp|P17174-2|AATC_HUMAN;sp|P17174|AATC_HUMAN	FALSE	10205666	14358132	16648345	11856488	16335791	14912298	0
sp|P06753-7|TPM3_HUMAN	FALSE	14364674	21029124	19815544	19691812	20771024	19229124	0.00191571
tr|H3BV69|H3BV69_HUMAN;tr|H3BRM5|H3BRM5_HUMAN;sp|P20674|COX5A_HUMAN	FALSE	49995576	45260612	44187800	44241852	46590676	39987808	0
sp|O75390|CISY_HUMAN;tr|B4DJV2|B4DJV2_HUMAN;tr|A0A0C4DGI3|A0A0C4DGI3_HUMAN	FALSE	77916600	80438536	59463800	58682392	66535824	63419848	0
sp|O00567|NOP56_HUMAN;tr|H0YDU4|H0YDU4_HUMAN;tr|H0Y653|H0Y653_HUMAN	FALSE	3.24306e+06	4745531	5556520	5.19392e+06	5.80261e+06	6185310	0.00462606
sp|Q13148|TADBP_HUMAN;tr|B1AKP7|B1AKP7_HUMAN;tr|G3V162|G3V162_HUMAN;tr|K7EN94|K7EN94_HUMAN;tr|A0A087X260|A0A087X260_HUMAN;tr|A0A0A0N0M3|A0A0A0N0M3_HUMAN;tr|K7EJM5|K7EJM5_HUMAN;tr|A0A087WX29|A0A087WX29_HUMAN;tr|A0A087WYY0|A0A087WYY0_HUMAN	FALSE	9519303	10488218	9453585	7.78302e+06	8222688	6986754	0.00241546
sp|P14618-3|KPYM_HUMAN	FALSE	300287968	269800928	274214016	313749248	329104448	308294112	0
sp|P12277|KCRB_HUMAN	FALSE	30236482	31119240	30461366	33597928	37896660	32098400	0
tr|H0Y9X3|H0Y9X3_HUMAN	FALSE	9922920	16878694	15817115	17360028	14675443	19081720	0.00191571
tr|A0A087WUK2|A0A087WUK2_HUMAN;sp|O14979-2|HNRDL_HUMAN;sp|O14979|HNRDL_HUMAN;sp|O14979-3|HNRDL_HUMAN	FALSE	57713984	68132200	59749028	66280284	71174320	72196264	0
tr|G3V2W4|G3V2W4_HUMAN	FALSE	35490400	28955616	30663766	33043758	35410708	33970528	0
tr|K7EM20|K7EM20_HUMAN	FALSE	124648832	57481544	134438592	93222472	150029584	77772632	0
sp|P50990|TCPQ_HUMAN	FALSE	50643540	36313224	32401234	36781252	33247132	28403038	0
tr|I3L192|I3L192_HUMAN	FALSE	64626416	55142728	51396848	53675532	59048160	54856264	0
sp|P38117-2|ETFB_HUMAN;sp|P38117|ETFB_HUMAN	FALSE	17649422	15480797	15936021	12756944	14507306	14495726	0
tr|C9K073|C9K073_HUMAN;tr|C9JF13|C9JF13_HUMAN;tr|C9J6B6|C9J6B6_HUMAN;tr|C9J2Z7|C9J2Z7_HUMAN	FALSE	6.61241e+06	9083804	7.0978e+06	9330688	13819405	7.1399e+06	0
tr|K7ELC7|K7ELC7_HUMAN	FALSE	27296710	60414724	43742476	63089872	64839604	66000548	0
tr|G8JLA2|G8JLA2_HUMAN;tr|J3KND3|J3KND3_HUMAN;tr|G3V1V0|G3V1V0_HUMAN;sp|P60660-2|MYL6_HUMAN;sp|P60660|MYL6_HUMAN;tr|B7Z6Z4|B7Z6Z4_HUMAN;tr|F8W1R7|F8W1R7_HUMAN	FALSE	8.21726e+06	10937193	19647118	11896380	18032410	19441992	0.00462606
tr|H3BSC1|H3BSC1_HUMAN;tr|H3BMH2|H3BMH2_HUMAN;sp|P62491|RB11A_HUMAN;sp|Q15907|RB11B_HUMAN;tr|B4DQU5|B4DQU5_HUMAN;sp|Q15907-2|RB11B_HUMAN;sp|P62491-2|RB11A_HUMAN	FALSE	13041042	12910477	11800488	12635489	11522258	11078457	0
tr|H7C561|H7C561_HUMAN;sp|Q15637-3|SF01_HUMAN;sp|Q15637-6|SF01_HUMAN;sp|Q15637-5|SF01_HUMAN;sp|Q15637|SF01_HUMAN;sp|Q15637-2|SF01_HUMAN;sp|Q15637-7|SF01_HUMAN;sp|Q15637-4|SF01_HUMAN	FALSE	3.9171e+06	3.05469e+06	3.49127e+06	3.84854e+06	3.98507e+06	4.17202e+06	0
sp|Q14247-2|SRC8_HUMAN;sp|Q14247-3|SRC8_HUMAN;sp|Q14247|SRC8_HUMAN	FALSE	1.49127e+06	5273637	4857930	3608280	5548177	5844250	0.00241546
tr|D3YTB1|D3YTB1_HUMAN;tr|F8W727|F8W727_HUMAN;sp|P62910|RL32_HUMAN	FALSE	96469176	135088384	118887392	132257704	145859152	133683296	0
tr|A0A087WVQ6|A0A087WVQ6_HUMAN;sp|Q00610-2|CLH1_HUMAN;sp|Q00610|CLH1_HUMAN	FALSE	95779712	121560304	123543200	123459288	137607888	143021424	0
tr|F8WEJ5|F8WEJ5_HUMAN;sp|P08243|ASNS_HUMAN;sp|P08243-3|ASNS_HUMAN;sp|P08243-2|ASNS_HUMAN	FALSE	31817644	29918332	30686774	27067278	31726576	30330536	0.00191571
tr|D6RJ96|D6RJ96_HUMAN;tr|A0A0A0MSM0|A0A0A0MSM0_HUMAN	FALSE	17578868	16517148	14534499	16651879	21201846	21970914	0
tr|F8W0W8|F8W0W8_HUMAN;sp|P36873|PP1G_HUMAN;sp|P36873-2|PP1G_HUMAN	FALSE	1.6299e+06	1.89243e+06	1652177	2.13493e+06	2.39654e+06	2301497	0
tr|C9JJQ8|C9JJQ8_HUMAN;tr|C9JEV8|C9JEV8_HUMAN;tr|C9JQ00|C9JQ00_HUMAN	FALSE	195072528	182666832	178179232	166133744	191813776	166598800	0
sp|Q13492-2|PICAL_HUMAN;tr|E9PJT1|E9PJT1_HUMAN;sp|Q13492-3|PICAL_HUMAN;tr|E9PK13|E9PK13_HUMAN;sp|Q13492|PICAL_HUMAN;sp|Q13492-5|PICAL_HUMAN	FALSE	1.46255e+06	2.86458e+06	2.53039e+06	2.57145e+06	3.0355e+06	3105906	0
sp|P30086|PEBP1_HUMAN	FALSE	205509920	239666304	255336304	215512480	262871088	241555232	0
tr|H0YAB0|H0YAB0_HUMAN	FALSE	91926216	76583856	87405200	92692792	106027936	99968544	0
tr|D6RF23|D6RF23_HUMAN	FALSE	23174822	38687668	34727784	27573808	33111028	27376434	0.00241546
tr|C9JXG8|C9JXG8_HUMAN;sp|P43487-2|RANG_HUMAN;tr|C9JGV6|C9JGV6_HUMAN;tr|F6WQW2|F6WQW2_HUMAN;sp|P43487|RANG_HUMAN	FALSE	11755482	9750734	10801776	14410531	15949399	13970327	0
tr|C9JM19|C9JM19_HUMAN;tr|B5MCT8|B5MCT8_HUMAN	FALSE	23271460	23435796	23109634	21902858	23885784	25272610	0
sp|Q71DI3|H32_HUMAN;tr|K7EK07|K7EK07_HUMAN;sp|P68431|H31_HUMAN;sp|Q16695|H31T_HUMAN;sp|P84243|H33_HUMAN	FALSE	390236352	355672608	328965120	361565600	365785184	331249280	0
XXX_tr|A0A087WVS3|A0A087WVS3_HUMAN;XXX_tr|A0A087WVW4|A0A087WVW4_HUMAN;XXX_sp|O43548-2|TGM5_HUMAN;XXX_tr|A0A087WZC4|A0A087WZC4_HUMAN;XXX_sp|O43548|TGM5_HUMAN	TRUE	5251123	4.72205e+06	4505286	4.71554e+06	4945187	5616015	0.00241546
tr|E9PRC8|E9PRC8_HUMAN	FALSE	8219174	12560084	14959514	17482040	15615335	16457600	0
tr|E7EM57|E7EM57_HUMAN;tr|E7EUI8|E7EUI8_HUMAN;tr|E9PD92|E9PD92_HUMAN	FALSE	48937272	46699216	41662868	49010340	46622704	46534516	0
tr|H3BNX8|H3BNX8_HUMAN	FALSE	63320552	52771296	66368864	66797508	71586112	60792016	0.00241546
sp|Q9NQ29-3|LUC7L_HUMAN;sp|Q9NQ29|LUC7L_HUMAN;sp|Q9Y383-2|LC7L2_HUMAN;tr|A0A0A6YYJ8|A0A0A6YYJ8_HUMAN;sp|Q9Y383|LC7L2_HUMAN;tr|B8ZZ10|B8ZZ10_HUMAN;sp|Q96HJ9-2|FMC1_HUMAN;sp|Q9Y383-3|LC7L2_HUMAN;tr|A8MYV2|A8MYV2_HUMAN;sp|Q9NQ29-2|LUC7L_HUMAN	FALSE	1.19579e+06	2.35543e+06	1.79833e+06	1512699	2305402	1.91878e+06	0.00241546
sp|Q8NC51-4|PAIRB_HUMAN	FALSE	51762652	42804160	40583960	40120176	45162488	45174152	0
tr|J3KT73|J3KT73_HUMAN;tr|J3QL01|J3QL01_HUMAN	FALSE	37039728	35336800	29194542	33134532	35375592	32350264	0
tr|F8W0P7|F8W0P7_HUMAN	FALSE	110499952	84936896	100322880	98643608	101762056	86221408	0.00191571
sp|P08174-4|DAF_HUMAN;tr|H3BLV0|H3BLV0_HUMAN;sp|P08174-2|DAF_HUMAN;tr|B1AP13|B1AP13_HUMAN;sp|P08174-3|DAF_HUMAN;sp|P08174|DAF_HUMAN;sp|P08174-6|DAF_HUMAN;tr|H7BY55|H7BY55_HUMAN;sp|P08174-7|DAF_HUMAN;sp|P08174-5|DAF_HUMAN	FALSE	19172008	14527253	17574068	15003927	15637532	14673776	0.00241546
sp|Q53GS9|SNUT2_HUMAN;tr|A0A087X1B2|A0A087X1B2_HUMAN;sp|Q53GS9-2|SNUT2_HUMAN	FALSE	74324.9	441000	398691	280941	615724	446201	0.00241546
tr|E5RJH4|E5RJH4_HUMAN;sp|P48454-2|PP2BC_HUMAN;tr|H0YB04|H0YB04_HUMAN;sp|P48454|PP2BC_HUMAN;tr|G3V111|G3V111_HUMAN;tr|H0YC26|H0YC26_HUMAN;sp|P48454-3|PP2BC_HUMAN	FALSE	295952	143085	130086	167158	297870	152366	0.00462606
sp|P00505-2|AATM_HUMAN;sp|P00505|AATM_HUMAN	FALSE	9755286	19878584	19759084	17240684	26698270	20955468	0.00191571
tr|H3BVA8|H3BVA8_HUMAN;sp|Q15046-2|SYK_HUMAN;sp|Q15046|SYK_HUMAN	FALSE	20186014	17600168	18406406	14043877	18429456	17779372	0
sp|Q99714|HCD2_HUMAN;sp|Q99714-2|HCD2_HUMAN	FALSE	5.62517e+06	5595354	6.80201e+06	9551347	8632087	7698689	0.00241546
sp|P25786|PSA1_HUMAN;sp|P25786-2|PSA1_HUMAN;tr|F5GX11|F5GX11_HUMAN	FALSE	34261148	28320148	29817982	35220856	38009280	32175294	0.00191571
sp|Q15424|SAFB1_HUMAN;sp|Q15424-2|SAFB1_HUMAN;sp|Q14151|SAFB2_HUMAN;tr|K7EII0|K7EII0_HUMAN;sp|Q15424-3|SAFB1_HUMAN;sp|Q15424-4|SAFB1_HUMAN	FALSE	1.37076e+06	2171314	1.93355e+06	1512169	1.83951e+06	1.56817e+06	0.00241546
XXX_tr|V9GYG9|V9GYG9_HUMAN;XXX_sp|P02652|APOA2_HUMAN;XXX_tr|V9GYE3|V9GYE3_HUMAN;XXX_tr|V9GYM3|V9GYM3_HUMAN	TRUE	9878051	7810595	8564680	7.90181e+06	9648766	8792557	0.0040032
tr|A0A2R8YFE2|A0A2R8YFE2_HUMAN	FALSE	1521245824	1341951488	1291101312	1256629248	1343533056	1284154496	0
sp|Q6ZMW3-2|EMAL6_HUMAN;sp|Q6ZMW3|EMAL6_HUMAN	FALSE	17093396	8174908	1.72749e+06	68566.7	33986.8	0	0.00981873
tr|E9PD24|E9PD24_HUMAN;tr|E5RIR4|E5RIR4_HUMAN;tr|E7EVZ2|E7EVZ2_HUMAN;tr|E5RGE1|E5RGE1_HUMAN	FALSE	142776816	148591856	134554224	179074256	175114224	171234592	0
tr|B8A6G2|B8A6G2_HUMAN;tr|A6QRI9|A6QRI9_HUMAN	FALSE	22786748	61407340	53033084	59870836	67627800	69414656	0
tr|C9JDH9|C9JDH9_HUMAN;sp|Q9Y6E0-2|STK24_HUMAN;sp|O00506-2|STK25_HUMAN;sp|Q9P289-2|STK26_HUMAN;sp|Q9P289|STK26_HUMAN;tr|C9J232|C9J232_HUMAN;tr|C9JCC0|C9JCC0_HUMAN;tr|H7C279|H7C279_HUMAN;tr|C9J6L2|C9J6L2_HUMAN;tr|H0Y630|H0Y630_HUMAN;sp|O00506-3|STK25_HUMAN;tr|Q8NBY1|Q8NBY1_HUMAN;tr|B4DR80|B4DR80_HUMAN;tr|B4E0Y9|B4E0Y9_HUMAN;sp|O00506|STK25_HUMAN;sp|Q9Y6E0|STK24_HUMAN;tr|Q5JV98|Q5JV98_HUMAN	FALSE	5569477	4528991	3858791	4.53741e+06	5.34462e+06	5.27425e+06	0.00191571
tr|J3KSN7|J3KSN7_HUMAN;tr|J3KS93|J3KS93_HUMAN;tr|J3KT04|J3KT04_HUMAN;tr|E7EMV8|E7EMV8_HUMAN	FALSE	62546460	53232232	48418076	45572340	56512912	57345500	0
tr|D6RGV9|D6RGV9_HUMAN;sp|Q9H2U2|IPYR2_HUMAN;sp|Q9H2U2-2|IPYR2_HUMAN;tr|H0YAK2|H0YAK2_HUMAN;tr|H0Y9D8|H0Y9D8_HUMAN;tr|D6RGI1|D6RGI1_HUMAN;sp|Q9H2U2-3|IPYR2_HUMAN	FALSE	37641228	33818572	29213456	23158772	23839642	22483108	0
tr|H0YE58|H0YE58_HUMAN;tr|H0YE72|H0YE72_HUMAN;tr|E9PQC9|E9PQC9_HUMAN	FALSE	27089454	14424311	14337818	15839128	16110405	15556566	0
tr|C9JNW5|C9JNW5_HUMAN;tr|C9JXB8|C9JXB8_HUMAN;sp|P83731|RL24_HUMAN	FALSE	102725984	92987552	85529392	103250816	106485832	93208048	0
sp|P05387|RLA2_HUMAN	FALSE	345163360	349054720	330448832	358565664	386164000	363457728	0
sp|P36542|ATPG_HUMAN;sp|P36542-2|ATPG_HUMAN	FALSE	24136080	22485378	16106835	15902429	20540160	19040194	0
tr|Q4VY20|Q4VY20_HUMAN;tr|Q4VY19|Q4VY19_HUMAN;tr|A0A0J9YWZ2|A0A0J9YWZ2_HUMAN;tr|A0A0J9YWE8|A0A0J9YWE8_HUMAN	FALSE	161437616	154033456	135958336	184130864	177572480	173508640	0
tr|C9JRL4|C9JRL4_HUMAN	FALSE	12917728	12885162	12002625	10178003	14746153	11585759	0
tr|A0A1W2PP22|A0A1W2PP22_HUMAN	FALSE	58375592	54366800	55234648	65710984	60999920	52942776	0
tr|I3L3P7|I3L3P7_HUMAN;sp|P62244|RS15A_HUMAN	FALSE	83880976	70456960	71616760	65722956	70850056	65328340	0
sp|P62847-2|RS24_HUMAN;sp|P62847-3|RS24_HUMAN;sp|P62847-4|RS24_HUMAN;tr|A0A2R8Y849|A0A2R8Y849_HUMAN;tr|A0A2R8YD14|A0A2R8YD14_HUMAN;tr|E7ETK0|E7ETK0_HUMAN;tr|A0A087WUS0|A0A087WUS0_HUMAN;sp|P62847|RS24_HUMAN	FALSE	3.79192e+06	9048976	6638331	9404423	11797654	6470922	0
tr|G3XAN0|G3XAN0_HUMAN	FALSE	67045564	126538192	114411496	108323024	138629984	122443856	0
tr|E9PI39|E9PI39_HUMAN;tr|E9PPR1|E9PPR1_HUMAN;tr|E9PL12|E9PL12_HUMAN;tr|E9PQ49|E9PQ49_HUMAN	FALSE	22436766	44162020	43716456	41943944	49006224	43513428	0.00241546
sp|Q92841-2|DDX17_HUMAN;sp|Q92841-1|DDX17_HUMAN;sp|Q92841-3|DDX17_HUMAN;tr|A0A1X7SBZ2|A0A1X7SBZ2_HUMAN;sp|Q92841|DDX17_HUMAN;tr|A0A1W2PQ51|A0A1W2PQ51_HUMAN	FALSE	115227648	99001976	95942184	112890616	112271112	116207320	0
tr|H7C4L9|H7C4L9_HUMAN;sp|P54709-2|AT1B3_HUMAN;tr|C9JA36|C9JA36_HUMAN;sp|P54709|AT1B3_HUMAN	FALSE	41464484	34701232	31851410	38710972	42394220	40795840	0
tr|D6RDP7|D6RDP7_HUMAN;tr|D6RAU8|D6RAU8_HUMAN;tr|D6RB85|D6RB85_HUMAN;tr|H0Y9Q7|H0Y9Q7_HUMAN	FALSE	5.70351e+06	12138718	4888967	10593942	7364194	5.54799e+06	0.00241546
tr|A0A140T9Z6|A0A140T9Z6_HUMAN;sp|P30453|1A34_HUMAN;sp|P30456|1A43_HUMAN;tr|A0A140T955|A0A140T955_HUMAN;tr|Q9GJ45|Q9GJ45_HUMAN;tr|A0A1W2PPF8|A0A1W2PPF8_HUMAN;tr|B0UXQ0|B0UXQ0_HUMAN;sp|P10314|1A32_HUMAN;tr|A0A0G2JPD3|A0A0G2JPD3_HUMAN;sp|P30512|1A29_HUMAN;tr|A0A140T8Y4|A0A140T8Y4_HUMAN;tr|A0A140T941|A0A140T941_HUMAN;sp|P30459|1A74_HUMAN;sp|P16189|1A31_HUMAN;tr|A0A140T913|A0A140T913_HUMAN;tr|A0A140T…	FALSE	729452	3.99351e+06	3720580	2524040	4.48891e+06	4.06882e+06	0.00241546
tr|H7C342|H7C342_HUMAN;sp|P30046|DOPD_HUMAN;tr|J3KQ18|J3KQ18_HUMAN	FALSE	28912604	26604840	24973778	25756296	27951654	24661314	0
tr|Q5SQY0|Q5SQY0_HUMAN;tr|A0A075B736|A0A075B736_HUMAN	FALSE	226793872	426209024	447054400	429433216	476939200	472656256	0
sp|P51149|RAB7A_HUMAN;tr|C9J4V0|C9J4V0_HUMAN;tr|C9J4S4|C9J4S4_HUMAN;tr|C9J8S3|C9J8S3_HUMAN	FALSE	42391080	36528408	36630820	36946544	39677612	36616660	0
tr|A0A0D9SGF6|A0A0D9SGF6_HUMAN;sp|Q13813-2|SPTN1_HUMAN;sp|Q13813-3|SPTN1_HUMAN;tr|A0A0D9SF54|A0A0D9SF54_HUMAN;sp|Q13813|SPTN1_HUMAN	FALSE	15950150	46829832	100896656	104945472	101013240	33364728	0.00191571
tr|M0R2L9|M0R2L9_HUMAN;tr|M0R140|M0R140_HUMAN;tr|M0QXK4|M0QXK4_HUMAN;tr|M0QYF7|M0QYF7_HUMAN	FALSE	34902264	40473612	27534200	26838892	29621346	30436660	0
sp|O75874|IDHC_HUMAN	FALSE	923403	1.7059e+06	1.77037e+06	1.66025e+06	1.90317e+06	2137069	0.00241546
sp|P35232-2|PHB_HUMAN	FALSE	79181120	74629312	80799056	73445472	85943016	81349576	0
tr|C9JGE3|C9JGE3_HUMAN;sp|Q01844-6|EWS_HUMAN;sp|Q01844-5|EWS_HUMAN;sp|Q01844|EWS_HUMAN;sp|Q01844-2|EWS_HUMAN;tr|B0QYK0|B0QYK0_HUMAN;tr|A0A0D9SFL3|A0A0D9SFL3_HUMAN;sp|Q01844-3|EWS_HUMAN;tr|H7BY36|H7BY36_HUMAN	FALSE	96106.6	44456.7	1.27747e+06	2222693	2.07083e+06	2.51234e+06	0.00611154
sp|P62873|GBB1_HUMAN;sp|P62873-2|GBB1_HUMAN;tr|F6UT28|F6UT28_HUMAN;tr|F6X3N5|F6X3N5_HUMAN	FALSE	1.35421e+06	3.74107e+06	3153604	4439293	5202638	5961645	0.00462606
tr|H0Y548|H0Y548_HUMAN;sp|P30405-2|PPIF_HUMAN;tr|R4GN99|R4GN99_HUMAN;sp|P30405|PPIF_HUMAN	FALSE	10588222	9421743	9960625	9050073	11670726	9204100	0
tr|E9PS50|E9PS50_HUMAN	FALSE	54795412	46043068	42426528	45100056	53541720	48736980	0
sp|P0DP25|CALM3_HUMAN;tr|G3V479|G3V479_HUMAN;tr|E7EMB3|E7EMB3_HUMAN;sp|P0DP24|CALM2_HUMAN;tr|E7ETZ0|E7ETZ0_HUMAN;sp|P0DP23|CALM1_HUMAN;tr|F8WBR5|F8WBR5_HUMAN;tr|M0QZ52|M0QZ52_HUMAN;tr|H0Y7A7|H0Y7A7_HUMAN	FALSE	39647512	41055128	36357316	36974112	42696676	38855440	0
sp|Q07955-2|SRSF1_HUMAN;sp|Q07955-3|SRSF1_HUMAN;sp|Q07955|SRSF1_HUMAN;tr|J3KTL2|J3KTL2_HUMAN	FALSE	132654600	106354504	109396352	112886680	110614896	112590376	0
tr|F8W1U3|F8W1U3_HUMAN	FALSE	102235688	96644368	92819712	105124408	108420984	101036816	0.00191571
tr|H0YIZ0|H0YIZ0_HUMAN	FALSE	14115262	14600214	16528258	18511160	19317508	16242189	0
sp|P60900|PSA6_HUMAN;tr|G3V3I1|G3V3I1_HUMAN;tr|G3V3U4|G3V3U4_HUMAN;tr|G3V5Z7|G3V5Z7_HUMAN;tr|G3V295|G3V295_HUMAN	FALSE	16993560	9489650	11107169	8082055	14547988	11990058	0
sp|Q71UI9-4|H2AV_HUMAN;sp|Q71UI9-3|H2AV_HUMAN;sp|Q71UI9|H2AV_HUMAN;sp|P0C0S5|H2AZ_HUMAN	FALSE	6.01505e+06	20476952	21140002	17290694	25588202	21096328	0
sp|P62753|RS6_HUMAN	FALSE	51368420	42797412	47123844	40351016	47033812	46544288	0
sp|P07195|LDHB_HUMAN	FALSE	995018496	884950976	839600256	854331648	923511744	849598080	0
tr|E5RGH3|E5RGH3_HUMAN	FALSE	13012472	14498734	13143436	16235407	16839390	14379838	0
tr|G5E9G0|G5E9G0_HUMAN	FALSE	114461848	107638120	100310160	111428144	114137040	108875904	0
tr|H7BXG7|H7BXG7_HUMAN;sp|O94979-2|SC31A_HUMAN;sp|O94979-9|SC31A_HUMAN;sp|O94979-8|SC31A_HUMAN;sp|O94979|SC31A_HUMAN;sp|O94979-6|SC31A_HUMAN;tr|D6REX3|D6REX3_HUMAN;sp|O94979-3|SC31A_HUMAN;sp|O94979-10|SC31A_HUMAN;sp|O94979-4|SC31A_HUMAN;tr|D6RHZ5|D6RHZ5_HUMAN;tr|H0YAB3|H0YAB3_HUMAN;sp|O94979-7|SC31A_HUMAN	FALSE	354741	1.1292e+06	1157224	865905	1157717	1171388	0.00241546
sp|P04792|HSPB1_HUMAN	FALSE	76644624	104872592	107062728	109339664	124000200	116870472	0
tr|A0A140T9B3|A0A140T9B3_HUMAN;sp|P04222|1C03_HUMAN;sp|P10319|1B58_HUMAN;sp|P30498|1B78_HUMAN;sp|P30508|1C12_HUMAN;sp|Q29963|1C06_HUMAN;sp|P30490|1B52_HUMAN;sp|Q95604|1C17_HUMAN;tr|A0A0G2JIF0|A0A0G2JIF0_HUMAN;tr|A0A140T9M0|A0A140T9M0_HUMAN;sp|P30510|1C14_HUMAN;sp|Q9TNN7|1C05_HUMAN;sp|P30501|1C02_HUMAN;tr|A0A1W2PS56|A0A1W2PS56_HUMAN;tr|A0A1W2PRX1|A0A1W2PRX1_HUMAN;tr|A0A140T962|A0A140T962_HUMAN;tr|…	FALSE	121437	1396200	1.32167e+06	870223	1407348	1.24176e+06	0.00241546
sp|P0DPH7|TBA3C_HUMAN;sp|P0DPH8|TBA3D_HUMAN	FALSE	17792996	25176128	22262492	23247458	30280948	24458952	0
tr|A0A3B3ITT5|A0A3B3ITT5_HUMAN;sp|P47914|RL29_HUMAN	FALSE	140589328	181547904	176518992	156740352	188193888	190832560	0
tr|Q32Q12|Q32Q12_HUMAN;sp|P22392-2|NDKB_HUMAN	FALSE	86476032	87952632	84109504	78993032	92757464	95116584	0
sp|Q9HB71|CYBP_HUMAN;sp|Q9HB71-3|CYBP_HUMAN	FALSE	411931680	333295040	330212288	336657088	394535584	344134944	0
tr|E5RJR5|E5RJR5_HUMAN;sp|P63208|SKP1_HUMAN;tr|E7ERH2|E7ERH2_HUMAN;tr|F8W8N3|F8W8N3_HUMAN;sp|P63208-2|SKP1_HUMAN	FALSE	15690541	13518568	12629465	14841912	17327274	14720243	0
sp|P42677|RS27_HUMAN;tr|H0YMV8|H0YMV8_HUMAN;sp|Q71UM5|RS27L_HUMAN	FALSE	32862584	31395194	25688674	41215448	43372968	51365896	0
tr|B0YJC5|B0YJC5_HUMAN	FALSE	370389632	332830336	330509184	318700832	346611104	330785312	0
tr|U3KPZ0|U3KPZ0_HUMAN;tr|U3KQF3|U3KQF3_HUMAN	FALSE	41372236	71283192	67763416	66998648	74031552	68395744	0
tr|H0YH27|H0YH27_HUMAN;sp|Q86VP6-3|CAND1_HUMAN	FALSE	6.92527e+06	6.60818e+06	5.35985e+06	6093586	7.21364e+06	7844307	0.00241546
tr|E7EVA0|E7EVA0_HUMAN;sp|P27816-2|MAP4_HUMAN;sp|P27816-6|MAP4_HUMAN;sp|P27816-5|MAP4_HUMAN;tr|F8W9U4|F8W9U4_HUMAN;sp|P27816-4|MAP4_HUMAN;sp|P27816|MAP4_HUMAN;tr|H0Y2V1|H0Y2V1_HUMAN;tr|H7C4C5|H7C4C5_HUMAN	FALSE	13978548	24423008	27875888	28164318	33581284	34544288	0
sp|Q08945|SSRP1_HUMAN	FALSE	5.89897e+06	6297879	5914558	7.12212e+06	6.26357e+06	6292664	0
tr|G3V0E5|G3V0E5_HUMAN;sp|P02786|TFR1_HUMAN	FALSE	3467715	2.46381e+06	3.0514e+06	2.4193e+06	3.00848e+06	2.77742e+06	0.00241546
sp|P28074-3|PSB5_HUMAN	FALSE	10654769	7.74398e+06	8028416	7.94613e+06	7562610	5.95939e+06	0.00241546
sp|Q9H8S9|MOB1A_HUMAN;sp|Q7L9L4|MOB1B_HUMAN;sp|Q7L9L4-2|MOB1B_HUMAN	FALSE	1.06721e+06	34312348	29009364	31574272	18450680	23313988	0.00321027
tr|D6RIE3|D6RIE3_HUMAN;tr|H0UI06|H0UI06_HUMAN;sp|P14406|CX7A2_HUMAN;tr|D6RGV5|D6RGV5_HUMAN	FALSE	21075514	18164512	19137782	18283550	17030480	15839318	0
tr|E9PQ35|E9PQ35_HUMAN;tr|Q5SZW8|Q5SZW8_HUMAN	FALSE	10263068	8508776	8260706	11028531	12821852	10715135	0
sp|P43686|PRS6B_HUMAN;sp|P43686-2|PRS6B_HUMAN	FALSE	10591812	7147669	9103911	9130076	10816237	12152837	0
tr|A0A2R8Y8A0|A0A2R8Y8A0_HUMAN	FALSE	13550511	16258599	15747958	19319100	13152990	10390795	0
sp|P46776|RL27A_HUMAN;tr|E9PLL6|E9PLL6_HUMAN	FALSE	14181243	31925808	31430548	27803680	37298600	38225664	0
tr|F8VR82|F8VR82_HUMAN;tr|E7ETD8|E7ETD8_HUMAN;tr|E9PMD7|E9PMD7_HUMAN;tr|C9JP48|C9JP48_HUMAN;sp|P62136-2|PP1A_HUMAN;sp|P62136|PP1A_HUMAN;tr|C9J9S3|C9J9S3_HUMAN;tr|F8VYE8|F8VYE8_HUMAN;sp|P62136-3|PP1A_HUMAN;sp|P62140|PP1B_HUMAN;tr|A0A087WYY5|A0A087WYY5_HUMAN	FALSE	15536654	12784646	15148891	14576495	19116702	15680409	0
tr|H3BT58|H3BT58_HUMAN	FALSE	25515640	22218760	17412960	18433120	21101288	20937672	0
sp|P62258|1433E_HUMAN;sp|P62258-2|1433E_HUMAN	FALSE	209760656	197286256	193329616	220700208	242731472	230612528	0
sp|P36871-3|PGM1_HUMAN;sp|P36871-2|PGM1_HUMAN	FALSE	38772960	29334484	26821734	28183534	28450646	26994932	0
tr|C9JYS8|C9JYS8_HUMAN	FALSE	19764000	33561768	29748796	35241808	37256776	37118796	0
tr|F8VNW4|F8VNW4_HUMAN;sp|Q13765|NACA_HUMAN;sp|E9PAV3-2|NACAM_HUMAN;tr|F8W1N5|F8W1N5_HUMAN;sp|E9PAV3|NACAM_HUMAN;tr|F8W0W4|F8W0W4_HUMAN;tr|H0YHX9|H0YHX9_HUMAN;tr|F8VZJ2|F8VZJ2_HUMAN	FALSE	58211876	53657012	47765060	52738856	53432744	52091020	0
tr|E5RHG6|E5RHG6_HUMAN;tr|E5RJD8|E5RJD8_HUMAN;sp|O75347|TBCA_HUMAN;tr|E5RIW3|E5RIW3_HUMAN	FALSE	73506256	62866820	57237816	57931264	71584896	63745220	0
sp|P28074|PSB5_HUMAN	FALSE	6.7598e+06	19266946	19195880	17056440	19080978	23505114	0.00191571
sp|Q9NP58-4|ABCB6_HUMAN;sp|Q9NP58|ABCB6_HUMAN;tr|H7BXK9|H7BXK9_HUMAN	FALSE	23965696	19298714	19179480	18599474	21777464	18981880	0.00241546
tr|A0A1X7SBS1|A0A1X7SBS1_HUMAN	FALSE	23422838	43999612	40213876	58996204	45538396	53026376	0
sp|P08238|HS90B_HUMAN	FALSE	2472450304	2520044544	2497081344	2502692352	2823180288	2610431232	0
sp|P43307|SSRA_HUMAN;sp|P43307-2|SSRA_HUMAN;tr|C9J5W0|C9J5W0_HUMAN;tr|C9J3L8|C9J3L8_HUMAN;tr|A0A3B3IRT8|A0A3B3IRT8_HUMAN;tr|E9PAL7|E9PAL7_HUMAN;tr|C9IZQ1|C9IZQ1_HUMAN	FALSE	9396058	7.96085e+06	8.24526e+06	9027408	10997872	9053230	0
sp|P46779|RL28_HUMAN;sp|P46779-3|RL28_HUMAN;tr|H0YKD8|H0YKD8_HUMAN;sp|P46779-2|RL28_HUMAN	FALSE	76263896	61931016	56750140	64196024	70097232	62168608	0
sp|P14314-2|GLU2B_HUMAN;tr|K7ELL7|K7ELL7_HUMAN;sp|P14314|GLU2B_HUMAN	FALSE	6.86457e+06	6041597	6.97654e+06	7.87999e+06	9287753	8.01057e+06	0.00114025
sp|P37837|TALDO_HUMAN;tr|F2Z393|F2Z393_HUMAN	FALSE	37680108	28065060	25297316	32661882	35509232	33164778	0
sp|Q14152|EIF3A_HUMAN;sp|Q14152-2|EIF3A_HUMAN	FALSE	13455191	11355546	10604959	13819342	14758710	14711311	0
tr|J3QLR1|J3QLR1_HUMAN;tr|H7C4G5|H7C4G5_HUMAN	FALSE	9764459	15330600	15161511	12078130	16175597	16005377	0.00241546
tr|A0A0A0MSJ0|A0A0A0MSJ0_HUMAN;sp|Q86XP3|DDX42_HUMAN;sp|Q86XP3-2|DDX42_HUMAN	FALSE	0	0	725332	590352	783107	823587	0.00462606
tr|E9PQZ1|E9PQZ1_HUMAN;sp|P29692-4|EF1D_HUMAN	FALSE	51426476	44785520	45549264	48388676	46361600	47745456	0.00191571
sp|P40926-2|MDHM_HUMAN	FALSE	105100112	163520304	163303056	164467360	193565824	165154064	0
sp|P62633-5|CNBP_HUMAN;sp|P62633-3|CNBP_HUMAN;sp|P62633-8|CNBP_HUMAN;sp|P62633-2|CNBP_HUMAN;sp|P62633-7|CNBP_HUMAN;sp|P62633|CNBP_HUMAN;sp|P62633-4|CNBP_HUMAN;sp|P62633-6|CNBP_HUMAN	FALSE	2.37177e+06	7815917	6211466	10367456	12540268	11547058	0.00191571
sp|P34931|HS71L_HUMAN;tr|Q53FA3|Q53FA3_HUMAN	FALSE	8052042	7.63684e+06	7738262	10148535	11250816	12193189	0
tr|J3KP15|J3KP15_HUMAN;sp|Q01130-2|SRSF2_HUMAN;sp|Q01130|SRSF2_HUMAN;sp|Q9BRL6-2|SRSF8_HUMAN;sp|Q9BRL6|SRSF8_HUMAN;tr|J3QL05|J3QL05_HUMAN	FALSE	56549056	40650144	48902144	44867396	55794040	41101536	0.00241546
sp|P31150|GDIA_HUMAN;tr|Q5SX87|Q5SX87_HUMAN	FALSE	25500174	20170902	24368380	21864460	19726838	22350318	0
sp|O75526|RMXL2_HUMAN	FALSE	28538646	20830310	14829422	16110281	20930630	19381310	0
sp|P34897-2|GLYM_HUMAN;sp|P34897-3|GLYM_HUMAN;sp|P34897|GLYM_HUMAN	FALSE	17604164	15350989	14740940	17969488	18264376	17520224	0
sp|Q05519-2|SRS11_HUMAN;sp|Q05519|SRS11_HUMAN;tr|Q5T760|Q5T760_HUMAN	FALSE	10138275	8747108	8680741	10343001	11225833	11224789	0
tr|A0A0A0MR20|A0A0A0MR20_HUMAN;sp|Q9C0A0|CNTP4_HUMAN;tr|A0A087WTA1|A0A087WTA1_HUMAN;tr|E9PDN6|E9PDN6_HUMAN;tr|F5H107|F5H107_HUMAN;sp|Q9C0A0-2|CNTP4_HUMAN	FALSE	192386736	175470816	161526304	174403600	187379856	180309184	0.00241546
sp|P13073|COX41_HUMAN	FALSE	30976628	33885696	30253422	32852398	32739298	34321256	0
tr|J3QL32|J3QL32_HUMAN;tr|J3QL23|J3QL23_HUMAN;tr|J3QLK9|J3QLK9_HUMAN;tr|J3QR88|J3QR88_HUMAN;tr|E2QRB3|E2QRB3_HUMAN	FALSE	4.77386e+06	4.92658e+06	6.3327e+06	6116869	7951854	5912261	0.00241546
tr|F5H0C8|F5H0C8_HUMAN;sp|P09104-2|ENOG_HUMAN;sp|P09104|ENOG_HUMAN;tr|F5H1C3|F5H1C3_HUMAN	FALSE	336671008	321708384	313436416	348042432	336107232	342808992	0
tr|M0R0I5|M0R0I5_HUMAN	FALSE	15763026	15497804	14986519	12556839	15338241	12131086	0.00611154
sp|P31949|S10AB_HUMAN	FALSE	64729800	56764464	52227708	66285036	57316492	59573280	0
tr|A0A2R8Y798|A0A2R8Y798_HUMAN;tr|A0A2R8YEG5|A0A2R8YEG5_HUMAN	FALSE	313809056	270497536	263938000	255222576	268613824	253961856	0
sp|P13797|PLST_HUMAN;sp|P13797-2|PLST_HUMAN;sp|P13797-3|PLST_HUMAN;tr|A0A0A0MSQ0|A0A0A0MSQ0_HUMAN	FALSE	28146236	21443100	22631140	21262068	26901884	25048632	0
sp|P23921|RIR1_HUMAN	FALSE	1.64264e+06	3.84274e+06	3400330	3.07419e+06	4.06027e+06	3.81462e+06	0.00462606
sp|O75534|CSDE1_HUMAN;sp|O75534-2|CSDE1_HUMAN;tr|E9PLT0|E9PLT0_HUMAN;sp|O75534-3|CSDE1_HUMAN;sp|O75534-4|CSDE1_HUMAN	FALSE	2.28208e+06	3.60351e+06	3.2819e+06	3271050	3.47907e+06	3.66199e+06	0.00191571
tr|Q5T0D2|Q5T0D2_HUMAN;sp|P30085|KCY_HUMAN;sp|P30085-2|KCY_HUMAN	FALSE	6.81327e+06	5.64944e+06	6.18319e+06	6654755	7433479	6.51951e+06	0.00241546
sp|Q12906-3|ILF3_HUMAN;sp|Q12906-4|ILF3_HUMAN;sp|Q12906-2|ILF3_HUMAN;sp|Q12906-5|ILF3_HUMAN;sp|Q12906-7|ILF3_HUMAN;sp|Q12906|ILF3_HUMAN;sp|Q12906-6|ILF3_HUMAN	FALSE	64087212	68902304	67965248	68866584	76847200	81084424	0
sp|O43707-2|ACTN4_HUMAN	FALSE	34998084	58027872	62114636	60400316	69876816	65252064	0
tr|F8VW21|F8VW21_HUMAN	FALSE	88242768	88345888	85111920	61114252	58804464	49595888	0
tr|D6RAU2|D6RAU2_HUMAN;tr|E9PD14|E9PD14_HUMAN	FALSE	38352032	38240492	36341924	38460596	38057792	40593156	0.00241546
sp|Q08257-2|QOR_HUMAN;sp|Q08257-3|QOR_HUMAN;sp|Q08257|QOR_HUMAN	FALSE	3.81275e+06	9546724	10388444	8091771	10515009	9899359	0
tr|B4E1S2|B4E1S2_HUMAN;tr|Q6P452|Q6P452_HUMAN;sp|P09525-2|ANXA4_HUMAN;sp|P09525|ANXA4_HUMAN	FALSE	3.38849e+06	3291545	3.29661e+06	5512470	6496516	6.26502e+06	0.00462606
tr|A0A087WWX0|A0A087WWX0_HUMAN;sp|P19388|RPAB1_HUMAN;tr|A0A087WVZ9|A0A087WVZ9_HUMAN	FALSE	8429051	7.33262e+06	6539109	7.5852e+06	7.31776e+06	6398146	0.00241546
tr|B0AZS6|B0AZS6_HUMAN	FALSE	13622168	12865917	13202234	14071623	16665563	11749240	0
tr|H0YF32|H0YF32_HUMAN	FALSE	25844532	25656928	26452446	39549056	41337036	38178680	0
sp|Q01105|SET_HUMAN;sp|Q01105-3|SET_HUMAN;sp|P0DME0|SETLP_HUMAN;sp|Q01105-2|SET_HUMAN;tr|A0A087X027|A0A087X027_HUMAN;sp|Q01105-4|SET_HUMAN;tr|A0A0C4DFV9|A0A0C4DFV9_HUMAN	FALSE	116043280	100242744	107016088	120614608	117296568	118197280	0
sp|Q07666-3|KHDR1_HUMAN	FALSE	10051730	12882141	11807174	10506844	11756153	10716807	0.00191571
sp|P07355|ANXA2_HUMAN;sp|P07355-2|ANXA2_HUMAN;tr|H0YN42|H0YN42_HUMAN	FALSE	18070848	17751018	15753996	12856835	20948818	16298286	0
tr|E7ETK5|E7ETK5_HUMAN	FALSE	43694432	35477784	33330922	42769948	42169860	43610300	0
tr|A0A2R8Y7H4|A0A2R8Y7H4_HUMAN;sp|P21108|PRPS3_HUMAN;tr|B1ALA9|B1ALA9_HUMAN;sp|P60891|PRPS1_HUMAN;tr|A0A0B4J207|A0A0B4J207_HUMAN	FALSE	6619007	8940199	13777544	12846393	13931821	13862639	0
sp|P46777|RL5_HUMAN;tr|A0A2R8Y6J3|A0A2R8Y6J3_HUMAN	FALSE	200143808	189561856	187840224	180572352	199358240	182328576	0
tr|K7ERI7|K7ERI7_HUMAN;tr|K7EMH1|K7EMH1_HUMAN;tr|K7ELC4|K7ELC4_HUMAN;tr|K7EP65|K7EP65_HUMAN;tr|K7EKS7|K7EKS7_HUMAN;sp|P35268|RL22_HUMAN	FALSE	21071914	20076866	22242334	20057798	24996646	18769178	0
tr|K7ENA8|K7ENA8_HUMAN;sp|O75821|EIF3G_HUMAN;tr|K7EL20|K7EL20_HUMAN;tr|K7ER90|K7ER90_HUMAN	FALSE	3777679	4766396	4800729	5.08798e+06	6297049	5.50513e+06	0
sp|P52565|GDIR1_HUMAN;tr|J3KTF8|J3KTF8_HUMAN;tr|J3QQX2|J3QQX2_HUMAN	FALSE	14735488	13665288	12509219	14597769	16536723	13908495	0
sp|P17844|DDX5_HUMAN;sp|P17844-2|DDX5_HUMAN;tr|J3KTA4|J3KTA4_HUMAN	FALSE	28599022	55135868	64534908	72836304	41751752	29757576	0.00191571
sp|P05141|ADT2_HUMAN	FALSE	295272000	224932800	220941312	233895840	234331568	237933648	0
XXX_sp|O75955-2|FLOT1_HUMAN;XXX_tr|A0A140T907|A0A140T907_HUMAN;XXX_tr|A0A140T9W4|A0A140T9W4_HUMAN;XXX_tr|A0A140T9R1|A0A140T9R1_HUMAN;XXX_tr|A2AB09|A2AB09_HUMAN;XXX_tr|A0A140T9X0|A0A140T9X0_HUMAN;XXX_sp|O75955|FLOT1_HUMAN	TRUE	205903	16311356	13827973	14977552	14613943	14569223	0.0090978
tr|M0QY37|M0QY37_HUMAN;tr|M0R0X0|M0R0X0_HUMAN;tr|M0QX14|M0QX14_HUMAN	FALSE	34042200	65154556	65052396	48634100	68910544	55777604	0.00241546
tr|F8WE11|F8WE11_HUMAN;tr|E9PBH4|E9PBH4_HUMAN	FALSE	106659472	107162224	94534672	104174352	114733576	103935728	0.00114025
tr|F8VVM2|F8VVM2_HUMAN	FALSE	49319932	61346848	62228968	80333216	83209904	77447568	0
sp|P55769|NH2L1_HUMAN;tr|A0A3B3IUA2|A0A3B3IUA2_HUMAN;tr|B1AHD1|B1AHD1_HUMAN	FALSE	3.74936e+06	4580138	6.45057e+06	4.18663e+06	8025374	7207014	0.00462606
tr|A0A0G2JQH2|A0A0G2JQH2_HUMAN;tr|Q5GGW2|Q5GGW2_HUMAN	FALSE	64947892	54734108	58856272	61829624	64669724	60379372	0.00191571
tr|S4R359|S4R359_HUMAN	FALSE	133269416	117143064	106929768	112708168	115469032	108964024	0
tr|E9PP50|E9PP50_HUMAN	FALSE	55618820	90026352	93424640	93416240	118189032	117790904	0
tr|A0A286YF22|A0A286YF22_HUMAN;tr|A0A2C9F2M7|A0A2C9F2M7_HUMAN;sp|O43175|SERA_HUMAN	FALSE	246030272	211266256	207795664	242671152	259481200	239895808	0
tr|A0A0A0MSX9|A0A0A0MSX9_HUMAN;sp|P41252|SYIC_HUMAN	FALSE	7030453	7240439	6814016	10391882	7933338	9289446	0.00241546
sp|P54819-5|KAD2_HUMAN;tr|F8VY04|F8VY04_HUMAN;sp|P54819-2|KAD2_HUMAN;tr|F8W1A4|F8W1A4_HUMAN;sp|P54819|KAD2_HUMAN	FALSE	30044568	38998128	37541004	34212352	38698228	38271388	0
tr|A0A087WX41|A0A087WX41_HUMAN;sp|P53675-2|CLH2_HUMAN;sp|P53675|CLH2_HUMAN	FALSE	21189794	28314028	29750730	31454512	28529826	29363606	0.00241546
sp|P06748|NPM_HUMAN;sp|P06748-2|NPM_HUMAN	FALSE	158276016	293722784	284068864	235120656	300712640	289724960	0
sp|P25205|MCM3_HUMAN;tr|J3KQ69|J3KQ69_HUMAN;sp|P25205-2|MCM3_HUMAN	FALSE	12787875	10283676	11021395	10442274	10852538	12441184	0
sp|P30041|PRDX6_HUMAN	FALSE	343052768	315462272	328727264	366676000	382840096	366595904	0
tr|M0QYT0|M0QYT0_HUMAN	FALSE	10945225	16825652	14959820	20378750	23719390	21716062	0
tr|E9PS65|E9PS65_HUMAN	FALSE	193434016	160503600	154791200	154134016	165724144	166069152	0
tr|D6R9I7|D6R9I7_HUMAN;tr|D6RIX0|D6RIX0_HUMAN;tr|D6RDJ2|D6RDJ2_HUMAN	FALSE	27369676	49227956	44423980	46046828	51956912	49577524	0
sp|P52292|IMA1_HUMAN	FALSE	14213806	12335982	13306860	14084188	15403999	14074883	0.00191571
sp|O75369|FLNB_HUMAN;sp|O75369-4|FLNB_HUMAN;sp|O75369-8|FLNB_HUMAN;sp|O75369-5|FLNB_HUMAN;sp|O75369-3|FLNB_HUMAN;sp|O75369-9|FLNB_HUMAN;sp|O75369-6|FLNB_HUMAN;sp|O75369-2|FLNB_HUMAN	FALSE	27389514	23962310	14363907	26700078	24969402	3387813	0.00241546
tr|I3L0M9|I3L0M9_HUMAN;sp|Q15370|ELOB_HUMAN;tr|B8ZZU8|B8ZZU8_HUMAN;tr|A0A0B4J296|A0A0B4J296_HUMAN;sp|Q15370-2|ELOB_HUMAN	FALSE	11159131	12524747	11393261	9861534	11604814	10719711	0.0040032
tr|B7Z4E3|B7Z4E3_HUMAN;sp|P62899|RL31_HUMAN;sp|P62899-2|RL31_HUMAN;tr|C9JU56|C9JU56_HUMAN;tr|H7C2W9|H7C2W9_HUMAN;sp|P62899-3|RL31_HUMAN;tr|B7Z4C8|B7Z4C8_HUMAN	FALSE	41350668	37376504	35973796	46558464	42364532	40361168	0
tr|M0QXL5|M0QXL5_HUMAN;tr|M0R0P1|M0R0P1_HUMAN;tr|M0R2Q4|M0R2Q4_HUMAN;sp|P22087|FBRL_HUMAN;tr|M0R299|M0R299_HUMAN	FALSE	21743172	35122236	30783034	38515020	32241186	24267548	0
sp|P26639|SYTC_HUMAN	FALSE	35010440	40251740	36345520	41357744	44191452	38297932	0
tr|A0A0A0MRF8|A0A0A0MRF8_HUMAN;tr|J3QLC8|J3QLC8_HUMAN;sp|P18621-2|RL17_HUMAN	FALSE	1.24675e+06	1.95467e+06	1.55574e+06	1.58261e+06	1.79573e+06	1.89175e+06	0
sp|P20340-2|RAB6A_HUMAN;tr|C9JU14|C9JU14_HUMAN;sp|Q9NRW1|RAB6B_HUMAN;sp|P20340|RAB6A_HUMAN;sp|Q9NRW1-2|RAB6B_HUMAN;tr|C9JB90|C9JB90_HUMAN;sp|P20340-4|RAB6A_HUMAN;tr|J3KR73|J3KR73_HUMAN;sp|Q14964|RB39A_HUMAN	FALSE	16937184	16452652	17343508	14285527	17307826	14706770	0
sp|Q00325-2|MPCP_HUMAN;sp|Q00325|MPCP_HUMAN	FALSE	49383024	46619896	42254112	48983516	46932516	45859808	0
sp|Q14141|SEPT6_HUMAN;tr|D6RDU5|D6RDU5_HUMAN;sp|Q9NVA2-2|SEP11_HUMAN;tr|B1AMS2|B1AMS2_HUMAN;tr|A0A087X142|A0A087X142_HUMAN;sp|Q92599-2|SEPT8_HUMAN;sp|Q92599-3|SEPT8_HUMAN;sp|Q92599|SEPT8_HUMAN;sp|Q14141-4|SEPT6_HUMAN;tr|F8W8I8|F8W8I8_HUMAN;tr|A6NMH6|A6NMH6_HUMAN;tr|D6RER5|D6RER5_HUMAN;sp|Q92599-4|SEPT8_HUMAN;tr|C9JV02|C9JV02_HUMAN;sp|Q9NVA2|SEP11_HUMAN;tr|D6RGI3|D6RGI3_HUMAN;tr|A6NFQ9|A6NFQ9_HUMA…	FALSE	16469940	15321704	15460335	16080339	18273830	17174456	0
tr|A0A0D9SGE8|A0A0D9SGE8_HUMAN;sp|Q8IWS0-5|PHF6_HUMAN;sp|Q8IWS0|PHF6_HUMAN;sp|Q8IWS0-4|PHF6_HUMAN;tr|Q5JRC6|Q5JRC6_HUMAN;sp|Q8IWS0-2|PHF6_HUMAN;sp|Q8IWS0-3|PHF6_HUMAN	FALSE	336693	2.62671e+06	2588191	1.95221e+06	3.74592e+06	3.49362e+06	0.00241546
tr|F6R6M7|F6R6M7_HUMAN;tr|F6QYI9|F6QYI9_HUMAN;tr|F6S2B7|F6S2B7_HUMAN;tr|K7ENP6|K7ENP6_HUMAN;tr|K7EIL8|K7EIL8_HUMAN;tr|A0A0G2JHN7|A0A0G2JHN7_HUMAN;tr|A0A0G2JJL7|A0A0G2JJL7_HUMAN;tr|F6SXL5|F6SXL5_HUMAN;tr|F6U6E2|F6U6E2_HUMAN;tr|K7EL56|K7EL56_HUMAN;tr|K7EN69|K7EN69_HUMAN	FALSE	22115670	43264164	40684860	33490480	48889280	38811748	0.00241546
tr|H7C367|H7C367_HUMAN	FALSE	46168692	43093912	38088548	39928792	46743528	43178928	0
sp|P12956-2|XRCC6_HUMAN;sp|P12956|XRCC6_HUMAN	FALSE	74045248	63660472	64951596	60192820	68469368	72383448	0
sp|Q15084-2|PDIA6_HUMAN;sp|Q15084-4|PDIA6_HUMAN;sp|Q15084|PDIA6_HUMAN;sp|Q15084-3|PDIA6_HUMAN;sp|Q15084-5|PDIA6_HUMAN	FALSE	99850768	97460928	90548736	104180768	106623536	98831208	0
tr|M0R0G9|M0R0G9_HUMAN;sp|P08579|RU2B_HUMAN;tr|M0R2B8|M0R2B8_HUMAN;tr|M0R221|M0R221_HUMAN;sp|P09012|SNRPA_HUMAN;tr|M0R268|M0R268_HUMAN;tr|M0QZG7|M0QZG7_HUMAN;tr|M0QXK2|M0QXK2_HUMAN	FALSE	6.20545e+06	13675680	12737441	11985221	14178606	14891829	0
tr|E7EPB3|E7EPB3_HUMAN;sp|P50914|RL14_HUMAN	FALSE	43294012	56912904	51908132	57205304	63997688	57237196	0.00191571
sp|Q14315|FLNC_HUMAN;sp|Q14315-2|FLNC_HUMAN	FALSE	6840393	7015803	6.53289e+06	7768312	9857701	9022044	0.00241546
sp|B2RXH8|HNRC2_HUMAN;sp|O60812|HNRC1_HUMAN;sp|B7ZW38|HNRC3_HUMAN;tr|A0A0G2JNQ3|A0A0G2JNQ3_HUMAN;tr|A0A0G2JPF8|A0A0G2JPF8_HUMAN;sp|P0DMR1|HNRC4_HUMAN	FALSE	91991664	85028168	85804632	81384160	87890512	85201888	0
sp|P31948|STIP1_HUMAN;sp|P31948-2|STIP1_HUMAN;sp|P31948-3|STIP1_HUMAN	FALSE	44691112	43144108	44510980	44261752	45908996	49787600	0
tr|X6R6Z1|X6R6Z1_HUMAN	FALSE	18387350	14731860	15288544	15593598	17476928	17085868	0
tr|D6RE99|D6RE99_HUMAN;tr|D6REP8|D6REP8_HUMAN;tr|D6RC06|D6RC06_HUMAN;sp|P49773|HINT1_HUMAN;tr|D6RD60|D6RD60_HUMAN	FALSE	46467432	49128252	36934388	43930948	48232420	44514232	0
sp|P59190|RAB15_HUMAN;tr|G3V196|G3V196_HUMAN;tr|A0A2R8YFB8|A0A2R8YFB8_HUMAN;sp|P59190-2|RAB15_HUMAN	FALSE	16937184	16452652	17343508	14285527	17307826	14706770	0
sp|Q6S8J3|POTEE_HUMAN	FALSE	577669376	683996608	625717184	797616000	767498560	733784832	0
tr|Q5JRS1|Q5JRS1_HUMAN;tr|Q5JRS3|Q5JRS3_HUMAN	FALSE	53850596	43011180	35339500	37220620	43683652	38623768	0
tr|K7ENA0|K7ENA0_HUMAN	FALSE	50678204	92793824	91560992	78932872	102039456	98665712	0
sp|P13637|AT1A3_HUMAN;sp|P13637-3|AT1A3_HUMAN;sp|P13637-2|AT1A3_HUMAN;tr|A0A0A0MT26|A0A0A0MT26_HUMAN;tr|A0A2R8YEY8|A0A2R8YEY8_HUMAN;tr|M0R116|M0R116_HUMAN	FALSE	5840412	12194240	11193816	16203237	12539080	15738997	0.00191571
tr|V9GZ17|V9GZ17_HUMAN	FALSE	315701760	291223808	287458240	325097408	352794368	326752576	0
tr|A0A2R8Y7K6|A0A2R8Y7K6_HUMAN;sp|P28340|DPOD1_HUMAN;tr|M0R2B7|M0R2B7_HUMAN;tr|M0QZR8|M0QZR8_HUMAN	FALSE	63037024	57307168	53188080	53700272	51704520	51507756	0.00684932
sp|Q15185|TEBP_HUMAN;sp|Q15185-4|TEBP_HUMAN;sp|Q15185-3|TEBP_HUMAN;tr|A0A087WYT3|A0A087WYT3_HUMAN	FALSE	54875796	58979892	62185216	67401608	77438880	61985928	0
sp|P27824|CALX_HUMAN;sp|P27824-2|CALX_HUMAN	FALSE	37532400	29279396	26146016	34408548	33972604	29916122	0
sp|Q14697|GANAB_HUMAN;sp|Q14697-2|GANAB_HUMAN;tr|F5H6X6|F5H6X6_HUMAN;tr|E9PKU7|E9PKU7_HUMAN	FALSE	29727458	24426948	24245574	23888562	27952818	19677134	0
sp|Q5XKP0|MIC13_HUMAN;tr|A0A140TA86|A0A140TA86_HUMAN;tr|A0A140TA84|A0A140TA84_HUMAN;tr|K7EIR2|K7EIR2_HUMAN	FALSE	4035911	4.67766e+06	2.48203e+06	4319259	5.08064e+06	5682986	0.00462606
sp|O60664-3|PLIN3_HUMAN;sp|O60664|PLIN3_HUMAN;sp|O60664-4|PLIN3_HUMAN	FALSE	4266355	16424018	10463688	11811116	16506945	12504741	0
sp|P32322-2|P5CR1_HUMAN;sp|P32322|P5CR1_HUMAN;tr|J3KQ22|J3KQ22_HUMAN;tr|J3QKT4|J3QKT4_HUMAN;sp|P32322-3|P5CR1_HUMAN;tr|J3QL24|J3QL24_HUMAN	FALSE	10187428	6.08149e+06	5417568	7.76968e+06	6145317	7292648	0
tr|C9JCQ4|C9JCQ4_HUMAN	FALSE	55398140	64601476	58314664	69067736	73806672	65748928	0
sp|A6NHQ2|FBLL1_HUMAN	FALSE	4989888	15665228	8442442	18106260	12396752	16240074	0.00191571
sp|P49588|SYAC_HUMAN;sp|P49588-2|SYAC_HUMAN	FALSE	56998068	55822220	55774880	50612480	60072744	58946064	0
sp|P30048|PRDX3_HUMAN;sp|P30048-2|PRDX3_HUMAN	FALSE	83240848	82293872	91426784	95445400	104969496	96365936	0
sp|P62854|RS26_HUMAN	FALSE	44920236	71065112	107631760	108123720	131442456	113477320	0.00191571
tr|M0QYR1|M0QYR1_HUMAN;sp|P08621-3|RU17_HUMAN;sp|P08621|RU17_HUMAN;sp|P08621-2|RU17_HUMAN	FALSE	29110412	24827390	30137214	24630834	35331936	36475504	0
tr|E9PRY8|E9PRY8_HUMAN;tr|E9PK01|E9PK01_HUMAN;sp|P29692-2|EF1D_HUMAN;sp|P29692|EF1D_HUMAN;tr|A0A087X1X7|A0A087X1X7_HUMAN	FALSE	61550620	56437704	56477056	60928796	65937920	58545120	0
tr|H0YMJ8|H0YMJ8_HUMAN;sp|P55010|IF5_HUMAN;tr|H0YLZ1|H0YLZ1_HUMAN;tr|H0YN40|H0YN40_HUMAN;tr|H0YM54|H0YM54_HUMAN;tr|H0YK11|H0YK11_HUMAN	FALSE	8.09243e+06	4845743	5373618	4.78605e+06	6.37458e+06	4596722	0
tr|A0A140T936|A0A140T936_HUMAN;sp|P26640|SYVC_HUMAN	FALSE	15749714	25665608	26912032	26772872	27098364	23416512	0.00191571
tr|F8VYV2|F8VYV2_HUMAN	FALSE	3.84647e+06	10509606	10916298	8.10599e+06	12061060	12467208	0
sp|Q9UHD8-4|SEPT9_HUMAN;sp|Q9UHD8-9|SEPT9_HUMAN;sp|Q9UHD8|SEPT9_HUMAN;sp|Q9UHD8-3|SEPT9_HUMAN;sp|Q9UHD8-8|SEPT9_HUMAN;sp|Q9UHD8-7|SEPT9_HUMAN;sp|Q9UHD8-2|SEPT9_HUMAN;tr|K7EL40|K7EL40_HUMAN;sp|Q9UHD8-5|SEPT9_HUMAN;tr|K7EK18|K7EK18_HUMAN	FALSE	15520148	10160417	8558627	12160296	11560614	10988957	0
sp|Q9UN86|G3BP2_HUMAN;sp|Q9UN86-2|G3BP2_HUMAN	FALSE	4.63001e+06	3.14781e+06	3.06722e+06	3444016	3.5435e+06	3.23869e+06	0
sp|P52597|HNRPF_HUMAN	FALSE	160129248	176483904	156166784	164746432	161690256	161199760	0
tr|K7EJE8|K7EJE8_HUMAN;sp|P36776-2|LONM_HUMAN;tr|K7EKE6|K7EKE6_HUMAN;sp|P36776|LONM_HUMAN	FALSE	37399244	33525750	31953670	8843967	9971824	7.44844e+06	0.00241546
tr|D6RD47|D6RD47_HUMAN	FALSE	32927380	56417820	52292384	47927008	61155872	55990352	0
tr|A0A2R8YEM5|A0A2R8YEM5_HUMAN	FALSE	39894308	33715044	34091404	35554140	37043816	36278328	0
sp|P05023-3|AT1A1_HUMAN;sp|P05023-4|AT1A1_HUMAN;sp|P05023|AT1A1_HUMAN	FALSE	23717898	22224836	20538794	24460272	28435804	28127244	0
sp|P30044-3|PRDX5_HUMAN;sp|P30044-2|PRDX5_HUMAN;sp|P30044|PRDX5_HUMAN	FALSE	21549254	22303116	19663642	20831264	21460844	20020924	0
tr|E9PMM9|E9PMM9_HUMAN	FALSE	66698752	55855356	54265708	52760968	63408200	55968668	0
tr|J3QQT2|J3QQT2_HUMAN;sp|P18621-3|RL17_HUMAN;tr|A0A087WXM6|A0A087WXM6_HUMAN;tr|J3QS96|J3QS96_HUMAN;tr|J3KRB3|J3KRB3_HUMAN;tr|A0A087WY81|A0A087WY81_HUMAN;tr|A0A0A6YYL6|A0A0A6YYL6_HUMAN;tr|A0A087WWH0|A0A087WWH0_HUMAN;tr|J3KRX5|J3KRX5_HUMAN;sp|P18621|RL17_HUMAN	FALSE	27357964	24284882	24419770	25992258	26524312	26075650	0
sp|P33316-2|DUT_HUMAN;tr|H0YMP1|H0YMP1_HUMAN;tr|A0A0C4DGL3|A0A0C4DGL3_HUMAN;tr|H0YKC5|H0YKC5_HUMAN;sp|P33316|DUT_HUMAN;tr|H0YNW5|H0YNW5_HUMAN	FALSE	15613421	20362746	15372628	19090030	19828198	19811442	0.00191571
tr|M0R117|M0R117_HUMAN	FALSE	25469712	23762758	20739798	21631596	25261592	26900684	0
tr|K7EJV9|K7EJV9_HUMAN;tr|A8MUS3|A8MUS3_HUMAN;tr|K7EMA7|K7EMA7_HUMAN;sp|P62750|RL23A_HUMAN;tr|H7BY10|H7BY10_HUMAN;tr|K7ERT8|K7ERT8_HUMAN	FALSE	218468720	184589792	182377728	181509440	204973152	196628256	0
sp|Q9Y4P8-5|WIPI2_HUMAN;sp|Q9Y4P8|WIPI2_HUMAN;sp|Q9Y4P8-3|WIPI2_HUMAN;sp|Q9Y4P8-4|WIPI2_HUMAN;sp|Q9Y4P8-6|WIPI2_HUMAN;sp|Q9Y4P8-2|WIPI2_HUMAN	FALSE	33369984	28780992	27034630	32598674	32214976	28916318	0.00241546
tr|E9PSF4|E9PSF4_HUMAN	FALSE	113459808	170377232	147503712	102270600	171026128	138632368	0
sp|Q58FG1|HS904_HUMAN	FALSE	381011136	390476608	369792960	389036960	441334048	405726016	0
sp|Q9BTT0-3|AN32E_HUMAN;sp|Q9BTT0|AN32E_HUMAN;tr|E9PPH5|E9PPH5_HUMAN	FALSE	13138724	9572790	12991158	11995650	15164971	16826810	0.00191571
tr|H0YKS4|H0YKS4_HUMAN	FALSE	42092532	42793404	40382916	50093724	45967772	49241780	0
tr|A0A087X0X3|A0A087X0X3_HUMAN;sp|P52272-2|HNRPM_HUMAN;sp|P52272|HNRPM_HUMAN	FALSE	58296128	69368440	55767192	68114176	64617664	68463320	0
tr|D6RBQ9|D6RBQ9_HUMAN	FALSE	33772400	30680132	28993490	32887160	37524992	31737066	0
sp|O00154-2|BACH_HUMAN;sp|O00154-3|BACH_HUMAN;sp|O00154-5|BACH_HUMAN;sp|O00154-6|BACH_HUMAN;sp|O00154|BACH_HUMAN;sp|O00154-4|BACH_HUMAN;tr|K7EKP8|K7EKP8_HUMAN;sp|O00154-7|BACH_HUMAN	FALSE	6348677	5.74367e+06	4753674	4.62819e+06	6445983	5228613	0
tr|A0A2R8Y738|A0A2R8Y738_HUMAN;tr|E7EX53|E7EX53_HUMAN;sp|P61313-2|RL15_HUMAN	FALSE	45991668	35773748	39473380	46106932	47391268	43665588	0.00114025
tr|F5H793|F5H793_HUMAN	FALSE	329148448	315548224	336675296	468160800	466351456	455240288	0
sp|Q15233-2|NONO_HUMAN;sp|Q15233|NONO_HUMAN	FALSE	64914076	56062624	60134940	64599128	75175544	70490456	0
sp|P08133|ANXA6_HUMAN;sp|P08133-2|ANXA6_HUMAN	FALSE	12457638	11598772	11421295	13077418	12307456	10123487	0
sp|P55084-2|ECHB_HUMAN;sp|P55084|ECHB_HUMAN	FALSE	3.84008e+06	10552747	10481594	10752467	11610235	12837220	0.00191571
tr|A0A3B3IRU2|A0A3B3IRU2_HUMAN	FALSE	18374276	22395592	18272820	28414302	27580726	26644694	0
tr|H0YKT8|H0YKT8_HUMAN;tr|H0YMA1|H0YMA1_HUMAN	FALSE	17993872	22051104	19541608	19730150	20391780	19024862	0.00191571
sp|Q14103-3|HNRPD_HUMAN;sp|Q14103|HNRPD_HUMAN;tr|H0Y8G5|H0Y8G5_HUMAN	FALSE	3.48003e+06	5.44459e+06	4049001	3.52194e+06	4.68043e+06	4265952	0
tr|E9PJF7|E9PJF7_HUMAN;sp|Q56UQ5|TPT1L_HUMAN;sp|P13693|TCTP_HUMAN;tr|J3KPG2|J3KPG2_HUMAN;tr|Q5W0H4|Q5W0H4_HUMAN;tr|A0A0B4J2C3|A0A0B4J2C3_HUMAN;sp|P13693-2|TCTP_HUMAN	FALSE	17930034	17615772	15715686	16950138	18455106	17349538	0.00191571
tr|Q5T4U5|Q5T4U5_HUMAN;tr|B7Z9I1|B7Z9I1_HUMAN;sp|P11310-2|ACADM_HUMAN;sp|P11310|ACADM_HUMAN	FALSE	7168820	8979416	7434632	5479828	10042598	6525175	0.00462606
sp|Q92901|RL3L_HUMAN	FALSE	21482862	49751972	45125956	52523144	58320808	55276672	0.00114025
sp|P50990-3|TCPQ_HUMAN	FALSE	107014144	101979512	102191232	92442656	88226920	82843784	0
tr|E5RGZ4|E5RGZ4_HUMAN;tr|K7EKN2|K7EKN2_HUMAN;tr|E5RG95|E5RG95_HUMAN;tr|E5RI09|E5RI09_HUMAN;tr|K7EPM1|K7EPM1_HUMAN	FALSE	414470432	365445024	353002784	367914816	382122560	372352512	0.00241546
sp|Q9NY65-2|TBA8_HUMAN;tr|C9J2C0|C9J2C0_HUMAN;sp|Q9NY65|TBA8_HUMAN	FALSE	116686936	156203024	126638392	195186096	197414656	169560096	0.00191571
sp|Q15654|TRIP6_HUMAN	FALSE	518943	3.09178e+06	3.59048e+06	2.58451e+06	3764762	3455833	0.00462606
sp|Q9Y262|EIF3L_HUMAN;sp|Q9Y262-2|EIF3L_HUMAN;tr|B0QY89|B0QY89_HUMAN;tr|B0QY90|B0QY90_HUMAN	FALSE	2399085	2.88451e+06	2.56007e+06	2.96729e+06	2.60633e+06	2.82804e+06	0.00191571
sp|P13929-2|ENOB_HUMAN;sp|P13929-3|ENOB_HUMAN;sp|P13929|ENOB_HUMAN	FALSE	239093504	228890928	235164848	237696912	261835712	249919712	0
tr|A0A2R8Y6G6|A0A2R8Y6G6_HUMAN	FALSE	2722673408	2405915392	2360244224	2436971264	2632276224	2466046464	0
sp|O75475-2|PSIP1_HUMAN;sp|O75475|PSIP1_HUMAN;sp|O75475-3|PSIP1_HUMAN	FALSE	6062363	5615871	4.52718e+06	4.38541e+06	6.03106e+06	5554914	0.00191571
tr|E9PK25|E9PK25_HUMAN;tr|G3V1A4|G3V1A4_HUMAN;sp|P23528|COF1_HUMAN	FALSE	160334912	173097248	173641664	190273328	237208144	189824992	0
tr|F8W020|F8W020_HUMAN;tr|B7Z9C2|B7Z9C2_HUMAN;tr|F8VRJ2|F8VRJ2_HUMAN;tr|F8VV59|F8VV59_HUMAN;tr|F5H4R6|F5H4R6_HUMAN;tr|F8W118|F8W118_HUMAN;tr|H0YIV4|H0YIV4_HUMAN;tr|F8VY35|F8VY35_HUMAN;tr|H0YHC3|H0YHC3_HUMAN;tr|F8W0J6|F8W0J6_HUMAN;sp|P55209-2|NP1L1_HUMAN;sp|P55209|NP1L1_HUMAN	FALSE	36944848	29817088	28244416	31893162	33544570	35218264	0
sp|Q8WUM4-2|PDC6I_HUMAN;sp|Q8WUM4|PDC6I_HUMAN	FALSE	3.55786e+06	4.21081e+06	3.48652e+06	5382384	7.05151e+06	5220088	0
tr|C9J2Q4|C9J2Q4_HUMAN;tr|C9JB25|C9JB25_HUMAN;tr|C9IY94|C9IY94_HUMAN;sp|Q15019-2|SEPT2_HUMAN;sp|Q15019|SEPT2_HUMAN;tr|C9J938|C9J938_HUMAN;tr|H7C310|H7C310_HUMAN;tr|B5MCX3|B5MCX3_HUMAN;sp|Q15019-3|SEPT2_HUMAN	FALSE	2.361e+06	3728746	3.19582e+06	3.82453e+06	4.1302e+06	4.29225e+06	0.00462606
sp|Q6EEV6|SUMO4_HUMAN;sp|P55854|SUMO3_HUMAN;tr|A8MUA9|A8MUA9_HUMAN;sp|P61956-2|SUMO2_HUMAN;sp|P55854-2|SUMO3_HUMAN;tr|A8MU27|A8MU27_HUMAN;sp|P61956|SUMO2_HUMAN	FALSE	102672952	86769480	81779784	87334704	91288112	87425896	0
tr|H0YN52|H0YN52_HUMAN	FALSE	24559740	33679636	27231814	36435912	37651384	29541678	0
sp|Q13310-3|PABP4_HUMAN;tr|B1ANR0|B1ANR0_HUMAN;sp|Q13310|PABP4_HUMAN;sp|Q13310-2|PABP4_HUMAN	FALSE	11281833	9733206	11493716	10656096	11414700	10458610	0.00241546
tr|E9PQK7|E9PQK7_HUMAN;tr|E9PQQ4|E9PQQ4_HUMAN;tr|E9PK54|E9PK54_HUMAN	FALSE	60589152	54835408	52321352	69110936	60163220	58361744	0
tr|J3KTM9|J3KTM9_HUMAN;sp|Q14974-2|IMB1_HUMAN	FALSE	14239412	19241542	18674748	23059428	24629078	19708628	0
tr|Q5QPQ2|Q5QPQ2_HUMAN;tr|Q5QPQ1|Q5QPQ1_HUMAN;sp|O95372|LYPA2_HUMAN;tr|Q5QPN5|Q5QPN5_HUMAN;tr|Q5QPN9|Q5QPN9_HUMAN;tr|Q5QPQ3|Q5QPQ3_HUMAN	FALSE	2.5967e+06	5.17926e+06	3873771	4.62557e+06	4987888	4.73909e+06	0.00191571
tr|F8VTZ0|F8VTZ0_HUMAN	FALSE	64749448	63010108	44922808	46120116	42379460	39165176	0
sp|P60842|IF4A1_HUMAN	FALSE	62536568	62315504	57039376	67365616	67271896	63930600	0
tr|A2A3R5|A2A3R5_HUMAN	FALSE	22587120	18235972	16247645	20125868	26834272	23812578	0.00191571
tr|E9PKH2|E9PKH2_HUMAN;sp|P50454|SERPH_HUMAN	FALSE	18737922	22325948	21851530	23383338	28487426	33228938	0
sp|O43390-4|HNRPR_HUMAN;sp|O43390-2|HNRPR_HUMAN;sp|O43390|HNRPR_HUMAN	FALSE	12603252	28100748	27647102	26538870	34959356	31447042	0
tr|A0A0U1RRH9|A0A0U1RRH9_HUMAN;sp|Q6ZU15|SEP14_HUMAN;tr|G3V1Q4|G3V1Q4_HUMAN;tr|E7EPK1|E7EPK1_HUMAN;sp|Q16181|SEPT7_HUMAN;tr|E7ES33|E7ES33_HUMAN;tr|A0A0U1RRE1|A0A0U1RRE1_HUMAN;sp|Q16181-2|SEPT7_HUMAN	FALSE	16469940	15321704	15460335	16080339	18273830	17174456	0
tr|J3QSB4|J3QSB4_HUMAN	FALSE	43701360	39110900	50025624	55745044	52990900	48590872	0
XXX_sp|Q15424-2|SAFB1_HUMAN;XXX_sp|Q15424-3|SAFB1_HUMAN;XXX_sp|Q15424-4|SAFB1_HUMAN	TRUE	132368	10521983	12754928	14438765	3.30444e+06	146163	0.00835232
tr|J3KPX7|J3KPX7_HUMAN;sp|Q99623|PHB2_HUMAN;sp|Q99623-2|PHB2_HUMAN	FALSE	36247408	40262108	35122528	42562616	41115720	42151568	0
sp|O60506|HNRPQ_HUMAN;sp|O60506-3|HNRPQ_HUMAN;tr|B7Z645|B7Z645_HUMAN;sp|O60506-2|HNRPQ_HUMAN;sp|O60506-4|HNRPQ_HUMAN	FALSE	9436070	9060013	8849322	14755591	12560430	13703148	0
sp|P15531-2|NDKA_HUMAN;tr|E7ERL0|E7ERL0_HUMAN;sp|P15531|NDKA_HUMAN	FALSE	400175680	342626368	319682528	340797728	350445280	336183936	0
tr|E9PIZ1|E9PIZ1_HUMAN;tr|H0YCK7|H0YCK7_HUMAN;tr|E9PMW7|E9PMW7_HUMAN	FALSE	1.47862e+06	1.5433e+06	1.52705e+06	1341661	1.61263e+06	1.51591e+06	0
XXX_sp|A2VEC9|SSPO_HUMAN	TRUE	1.25388e+06	12381200	3174338	5095712	659100	2.0414e+06	0.00321027
tr|H0YL12|H0YL12_HUMAN;tr|H0YLU7|H0YLU7_HUMAN;tr|H0YKF0|H0YKF0_HUMAN	FALSE	15633438	25409072	24473468	17767538	27190824	26534332	0
sp|P51665|PSMD7_HUMAN	FALSE	2.03938e+06	3339758	3.00841e+06	3.1061e+06	3.64935e+06	2867415	0
sp|P53396|ACLY_HUMAN;sp|P53396-2|ACLY_HUMAN	FALSE	138950272	127356784	124296472	117413664	134956304	111030920	0
tr|A0A087WWY3|A0A087WWY3_HUMAN	FALSE	80689992	71230920	78055672	66351192	71423048	64355596	0
sp|Q13243-3|SRSF5_HUMAN;sp|Q13247-3|SRSF6_HUMAN;tr|B4DJK0|B4DJK0_HUMAN;tr|A0A0D9SEM4|A0A0D9SEM4_HUMAN;sp|Q13243|SRSF5_HUMAN;sp|Q13247|SRSF6_HUMAN;tr|B4DUA4|B4DUA4_HUMAN;sp|Q08170|SRSF4_HUMAN	FALSE	33311492	28876598	31017168	30599358	35033380	33547620	0.00241546
sp|Q9UBT2|SAE2_HUMAN;sp|Q9UBT2-2|SAE2_HUMAN	FALSE	11373359	19042728	23345408	17160560	7.97488e+06	7.88649e+06	0.00241546
sp|P07910-3|HNRPC_HUMAN	FALSE	163230112	146903952	137117792	139190000	155988272	146922464	0
sp|P00338-2|LDHA_HUMAN;sp|P00338-5|LDHA_HUMAN	FALSE	121318016	117526424	113459968	119497512	124286752	123759120	0
tr|F5GXR3|F5GXR3_HUMAN;sp|P20962|PTMS_HUMAN;tr|F5H7R9|F5H7R9_HUMAN	FALSE	56845972	47614640	32461616	36873812	35365536	33141852	0
sp|A6NMY6|AXA2L_HUMAN	FALSE	10391636	14488855	13771127	16006744	18867270	19786898	0
tr|C9JFC0|C9JFC0_HUMAN;tr|C9JPH9|C9JPH9_HUMAN;tr|A0A0A0MSB2|A0A0A0MSB2_HUMAN	FALSE	22093966	20498380	17278042	21048832	17713200	19770154	0.00191571
sp|P32754|HPPD_HUMAN;tr|A0A0B4J1R4|A0A0B4J1R4_HUMAN;sp|P32754-2|HPPD_HUMAN	FALSE	149653168	178069456	175602192	170917504	199978224	196145840	0
sp|P84103|SRSF3_HUMAN;sp|P84103-2|SRSF3_HUMAN;tr|A0A087X2D0|A0A087X2D0_HUMAN	FALSE	46433564	38945224	38422924	52299356	46641004	43813364	0.00191571
tr|B7Z4L4|B7Z4L4_HUMAN	FALSE	25797470	11643639	18230862	17591312	19933264	18580002	0
tr|A0A087WUW5|A0A087WUW5_HUMAN;tr|A0A0D9SF20|A0A0D9SF20_HUMAN	FALSE	15931715	34322192	28670564	30637866	38251164	36571108	0
sp|Q15149-5|PLEC_HUMAN;sp|Q15149-7|PLEC_HUMAN;tr|H0YDN1|H0YDN1_HUMAN;sp|Q15149-8|PLEC_HUMAN;sp|Q15149-6|PLEC_HUMAN;sp|Q15149|PLEC_HUMAN;sp|Q15149-4|PLEC_HUMAN;sp|Q15149-9|PLEC_HUMAN;sp|Q15149-3|PLEC_HUMAN;sp|Q15149-2|PLEC_HUMAN	FALSE	66330632	63313628	64255336	63008904	64793592	78397416	0
sp|P27708|PYR1_HUMAN;tr|F8VPD4|F8VPD4_HUMAN	FALSE	84220248	78833200	77640792	88871952	97792904	88502968	0
tr|A0A286YFM8|A0A286YFM8_HUMAN	FALSE	27989914	22566048	21218554	19020990	17398816	16628362	0.00191571
tr|J3QR02|J3QR02_HUMAN;tr|J3KRX8|J3KRX8_HUMAN;tr|J3KTQ4|J3KTQ4_HUMAN	FALSE	1141403	1.17834e+06	1.23627e+06	1.48052e+06	1.42303e+06	1.33282e+06	0.00462606
sp|Q13185|CBX3_HUMAN	FALSE	28299502	25729926	28833586	24754866	29386076	25394938	0
tr|V9GYZ6|V9GYZ6_HUMAN	FALSE	34383520	37456268	36473092	39088540	46920620	40777852	0
tr|H0Y8C6|H0Y8C6_HUMAN;sp|O00410-2|IPO5_HUMAN;sp|O00410-3|IPO5_HUMAN;sp|O00410|IPO5_HUMAN	FALSE	7331590	7165542	7.12881e+06	6.51523e+06	7.73123e+06	7217610	0
tr|F5GXU1|F5GXU1_HUMAN;tr|F5GWW2|F5GWW2_HUMAN;tr|F5H8H6|F5H8H6_HUMAN;tr|F5GXC7|F5GXC7_HUMAN	FALSE	55441196	50753656	35115508	36369836	32405242	42980120	0
tr|F8W0A3|F8W0A3_HUMAN	FALSE	12602718	31940488	35794232	37627444	45157696	45329164	0.00241546
tr|C9J8F3|C9J8F3_HUMAN;tr|J3KSV6|J3KSV6_HUMAN;tr|K7EKH5|K7EKH5_HUMAN;tr|A8MVZ9|A8MVZ9_HUMAN;sp|P09972|ALDOC_HUMAN;tr|J3QKP5|J3QKP5_HUMAN	FALSE	50021708	52543964	53383460	52581484	49044636	56932144	0
tr|A0A087WV22|A0A087WV22_HUMAN;tr|F8W7C6|F8W7C6_HUMAN	FALSE	89625184	92448432	90798304	91672896	77703272	67923480	0
sp|Q8TAA3|PSMA8_HUMAN;sp|Q8TAA3-5|PSMA8_HUMAN;tr|A0A087WYS6|A0A087WYS6_HUMAN;sp|O14818|PSA7_HUMAN;sp|O14818-2|PSA7_HUMAN;sp|Q8TAA3-2|PSMA8_HUMAN	FALSE	36217492	29024500	30934820	30903898	39844184	32023566	0.00241546
sp|P56537|IF6_HUMAN;tr|A0A0U1RQV5|A0A0U1RQV5_HUMAN;sp|P56537-2|IF6_HUMAN	FALSE	4131996	7476915	5083967	7936972	5.57789e+06	9113870	0.00191571
sp|P49915-2|GUAA_HUMAN;sp|P49915|GUAA_HUMAN	FALSE	10757175	9920348	8222673	8476437	8.31992e+06	9859518	0.00191571
tr|B1AHB1|B1AHB1_HUMAN;sp|P33992|MCM5_HUMAN	FALSE	151135	733103	860540	413823	777788	798320	0.00241546
tr|C9J592|C9J592_HUMAN;tr|C9IZZ0|C9IZZ0_HUMAN;tr|C9J7D1|C9J7D1_HUMAN	FALSE	13929401	15313441	10401909	15695963	17131670	13237184	0
tr|H0YFS2|H0YFS2_HUMAN	FALSE	64464700	107590512	105799368	106246720	132015336	131112344	0
sp|P27824-3|CALX_HUMAN	FALSE	21484990	18838644	11463250	20284168	13652927	17869030	0
tr|I3L1U9|I3L1U9_HUMAN;tr|I3L3I0|I3L3I0_HUMAN	FALSE	984080512	1450956928	1353583104	1261692800	1492860160	1397348992	0
tr|E9PKU4|E9PKU4_HUMAN	FALSE	149246736	116054456	114427032	116202424	125543712	118388024	0.00191571
tr|D6RI02|D6RI02_HUMAN	FALSE	34874152	33627444	30378896	30332756	35037056	29155834	0
tr|H0YDD8|H0YDD8_HUMAN	FALSE	272475680	251701072	224718128	245378800	257860000	221039360	0
tr|J3KS10|J3KS10_HUMAN	FALSE	25682462	22313546	20630034	26079724	18470358	25352790	0.00191571
sp|P51991-2|ROA3_HUMAN;sp|P51991|ROA3_HUMAN	FALSE	31688668	37089244	47411788	38711096	45769828	44791776	0
tr|H0YH88|H0YH88_HUMAN;tr|F8W543|F8W543_HUMAN;tr|F8VVB5|F8VVB5_HUMAN	FALSE	14671541	11831438	12664518	13857581	14680364	16699701	0
tr|F8VUG2|F8VUG2_HUMAN	FALSE	110849184	105228320	102040248	113006168	100748960	105546824	0
sp|Q13263-2|TIF1B_HUMAN;sp|Q13263|TIF1B_HUMAN	FALSE	11187340	12793433	11411170	12313266	13534480	14581653	0
tr|C9JTK6|C9JTK6_HUMAN;sp|Q9NTK5-3|OLA1_HUMAN;tr|J3KQ32|J3KQ32_HUMAN;sp|Q9NTK5|OLA1_HUMAN	FALSE	6971819	7950496	6009786	8017918	8488793	5444899	0
sp|Q4KWH8-2|PLCH1_HUMAN;sp|Q4KWH8-3|PLCH1_HUMAN;tr|A0A2U3TZV8|A0A2U3TZV8_HUMAN;sp|Q4KWH8-4|PLCH1_HUMAN;sp|Q4KWH8|PLCH1_HUMAN	FALSE	21394976	13913867	15287597	3.30725e+06	6.01595e+06	4.12048e+06	0.00191571
sp|P23527|H2B1O_HUMAN;sp|P06899|H2B1J_HUMAN;sp|P33778|H2B1B_HUMAN;sp|Q8N257|H2B3B_HUMAN;sp|Q16778|H2B2E_HUMAN	FALSE	126841872	113907216	150125536	211110704	230686928	216911568	0
tr|F8W079|F8W079_HUMAN	FALSE	335087936	284219936	280345728	316589760	324560416	305037216	0
sp|A6NJZ7|RIM3C_HUMAN;sp|A6NNM3|RIM3B_HUMAN;sp|Q9UFD9|RIM3A_HUMAN;tr|J3KP16|J3KP16_HUMAN	FALSE	14807064	15485255	15110364	2143082	1.57471e+06	0	0.00981873
tr|A0A2R8Y793|A0A2R8Y793_HUMAN	FALSE	63950344	91341056	103777496	90439664	118631664	131450176	0
sp|P40227-2|TCPZ_HUMAN	FALSE	85054720	73618680	73570080	65401012	74200864	67884648	0
tr|G3V203|G3V203_HUMAN	FALSE	85058512	75969648	76521792	86695936	86232584	89131920	0
sp|Q92928|RAB1C_HUMAN;sp|Q92930|RAB8B_HUMAN;tr|H0YNE9|H0YNE9_HUMAN;sp|P61006-2|RAB8A_HUMAN;sp|P61006|RAB8A_HUMAN;sp|P61026|RAB10_HUMAN;tr|H0YMN7|H0YMN7_HUMAN	FALSE	16937184	16452652	17343508	14285527	17307826	14706770	0
sp|P15259|PGAM2_HUMAN	FALSE	42477792	56761472	73154120	76748328	82270216	84522896	0.00191571
tr|D6RDJ6|D6RDJ6_HUMAN;tr|D6RCA5|D6RCA5_HUMAN	FALSE	19233958	16153546	13572122	14756710	14110103	15567061	0.00611154
tr|J3KRE2|J3KRE2_HUMAN;tr|J3KS60|J3KS60_HUMAN	FALSE	19333826	26071670	24644888	27045522	29109054	26948198	0
tr|F8WE98|F8WE98_HUMAN	FALSE	2.08245e+06	7.07494e+06	4.12707e+06	7.25914e+06	6.48974e+06	7289450	0
tr|B4DY09|B4DY09_HUMAN;sp|Q12905|ILF2_HUMAN	FALSE	21282654	25103292	25247698	25904828	29080726	28124162	0
tr|H3BQ34|H3BQ34_HUMAN	FALSE	95668096	363757472	421471360	371008480	473108992	489582176	0
sp|P16403|H12_HUMAN;sp|P16402|H13_HUMAN;sp|P10412|H14_HUMAN	FALSE	126189696	119649872	111602480	117113816	126113616	121507896	0
tr|F8W1I5|F8W1I5_HUMAN;tr|F8VPF3|F8VPF3_HUMAN;sp|P14649|MYL6B_HUMAN	FALSE	37213744	38005208	36664656	41060868	47037956	38680032	0
tr|A0A087WV01|A0A087WV01_HUMAN	FALSE	312530464	349317664	332082976	332686432	392852384	353512160	0
sp|Q7L2H7|EIF3M_HUMAN;tr|E7ESM3|E7ESM3_HUMAN;tr|E9PN86|E9PN86_HUMAN;tr|J3KNJ2|J3KNJ2_HUMAN	FALSE	2.72786e+06	2.50315e+06	2.26344e+06	2721656	2.88235e+06	2.40561e+06	0.00241546
tr|K7ESG8|K7ESG8_HUMAN	FALSE	18822240	16864246	17533202	21312348	22268856	19161834	0
sp|P68104|EF1A1_HUMAN;sp|Q5VTE0|EF1A3_HUMAN	FALSE	922197504	1053928128	944039552	1108523392	1122204160	1044905536	0
sp|Q9UNN5-2|FAF1_HUMAN;sp|Q9UNN5|FAF1_HUMAN;tr|B1ANM7|B1ANM7_HUMAN	FALSE	129650352	161469696	3.71067e+06	5.76499e+06	6.56497e+06	3.0114e+06	0.00241546
sp|P41091|IF2G_HUMAN	FALSE	21157592	16147282	15812817	18785558	17685304	17791316	0.00241546
tr|Q9BYK1|Q9BYK1_HUMAN;tr|Q8WVC2|Q8WVC2_HUMAN;sp|P63220|RS21_HUMAN	FALSE	6598182	14797896	13776888	11764856	14451535	16894762	0
tr|F6TLX2|F6TLX2_HUMAN;sp|Q9HC38-2|GLOD4_HUMAN;sp|Q9HC38|GLOD4_HUMAN;tr|I3L3Q4|I3L3Q4_HUMAN	FALSE	661695	2.48718e+06	3.39447e+06	3.01756e+06	3054636	3.65377e+06	0.0040032
sp|P32004|L1CAM_HUMAN;sp|P32004-3|L1CAM_HUMAN;sp|P32004-2|L1CAM_HUMAN	FALSE	6.00815e+06	8531092	9981867	8472696	8454044	11407569	0
tr|E9PSD5|E9PSD5_HUMAN;tr|E9PIZ4|E9PIZ4_HUMAN	FALSE	8243367	10140588	11432173	10258380	11841863	11242863	0
tr|Q5T6W2|Q5T6W2_HUMAN	FALSE	231845600	206797456	201667376	201938528	219726768	207536912	0
tr|F6UXX1|F6UXX1_HUMAN	FALSE	6535649	12278351	12918994	23190148	20743982	21842234	0.00191571
tr|D6RB09|D6RB09_HUMAN	FALSE	24185066	19173998	24163486	26466484	29060192	27380756	0
tr|A0A1W2PRP1|A0A1W2PRP1_HUMAN	FALSE	12924514	11910157	10180937	7.50067e+06	9699445	9969042	0.00241546
sp|P56192|SYMC_HUMAN;tr|F5H2V6|F5H2V6_HUMAN;sp|P56192-2|SYMC_HUMAN	FALSE	982931	3.72487e+06	3525752	3636102	4.05332e+06	3.36843e+06	0.00191571
tr|H7C3I1|H7C3I1_HUMAN;tr|Q3KNR6|Q3KNR6_HUMAN;sp|Q8IZP2|ST134_HUMAN;tr|F6VDH7|F6VDH7_HUMAN	FALSE	35643336	29474250	29018742	29995840	32747780	32325052	0
sp|Q04760|LGUL_HUMAN;sp|Q04760-2|LGUL_HUMAN	FALSE	44916136	51380772	49580564	57951304	73749504	58693960	0.00191571
tr|H0YAP2|H0YAP2_HUMAN	FALSE	26399356	22282422	27235748	23234862	25087910	28889922	0
sp|Q02790|FKBP4_HUMAN	FALSE	55666300	55945132	56811052	56397760	61808368	53591488	0
sp|P29373|RABP2_HUMAN	FALSE	50669468	42963804	42488760	45995500	46073960	49038260	0
tr|A0A0C4DG06|A0A0C4DG06_HUMAN;tr|B8ZZ38|B8ZZ38_HUMAN;tr|C9JCA9|C9JCA9_HUMAN	FALSE	14291177	15276685	16875372	24907848	23615342	24499806	0
tr|Q5SYZ4|Q5SYZ4_HUMAN	FALSE	15782976	14337530	11684091	13739693	16997718	11479899	0
sp|Q9BSJ8-2|ESYT1_HUMAN;sp|Q9BSJ8|ESYT1_HUMAN	FALSE	60494624	36017084	40132068	425833	744713	194008	0.00462606
tr|E7EXB4|E7EXB4_HUMAN	FALSE	26151068	29309462	26386262	34144160	34016516	30275732	0
sp|P18124|RL7_HUMAN	FALSE	156460384	152835968	133575640	154193584	134430208	144607952	0
tr|D6RAS7|D6RAS7_HUMAN	FALSE	34704868	35517720	30890328	38913860	38545384	36812456	0.00191571
sp|P41250|GARS_HUMAN	FALSE	27033968	31448852	33236602	36837532	35459128	34239600	0.00191571
tr|H0Y8E6|H0Y8E6_HUMAN;sp|P49736|MCM2_HUMAN	FALSE	8517390	23780250	20192794	21448670	22448964	22531170	0.00241546
tr|D6RIZ7|D6RIZ7_HUMAN;tr|H0Y914|H0Y914_HUMAN	FALSE	38204392	31307274	31662888	30727158	34726512	27616954	0
sp|Q96PK6|RBM14_HUMAN	FALSE	8.22629e+06	9323924	8626899	8478101	9656463	9520970	0.00191571
sp|P26639-2|SYTC_HUMAN	FALSE	80751288	70968280	71485600	80788872	71146992	69723000	0
tr|F8WAX4|F8WAX4_HUMAN	FALSE	49851704	48322268	44244684	42841512	44987352	46549992	0
sp|Q13151|ROA0_HUMAN	FALSE	27388614	22103312	22448088	24552152	20822428	19990316	0
tr|F8VR77|F8VR77_HUMAN	FALSE	9963988	11462390	12285944	12082621	12622353	12711401	0
tr|G3V4C1|G3V4C1_HUMAN;sp|P07910-2|HNRPC_HUMAN;sp|P07910|HNRPC_HUMAN;tr|G3V2Q1|G3V2Q1_HUMAN;tr|B2R5W2|B2R5W2_HUMAN;tr|G3V576|G3V576_HUMAN;tr|B4DY08|B4DY08_HUMAN;tr|G3V4W0|G3V4W0_HUMAN	FALSE	49921024	42195948	42676996	44304500	43065696	41723160	0
tr|H0YMZ1|H0YMZ1_HUMAN;sp|P25789|PSA4_HUMAN;tr|H0YN18|H0YN18_HUMAN;tr|H0YL69|H0YL69_HUMAN	FALSE	67081544	71357160	63633832	62147136	70598040	60159240	0
sp|Q58FF6|H90B4_HUMAN	FALSE	156976528	243041984	269501888	238833472	277582624	275832800	0
sp|P78330|SERB_HUMAN;tr|C9JBI3|C9JBI3_HUMAN	FALSE	1.58151e+06	10555358	7520227	1.3958e+06	654692	1.42152e+06	0.00241546
sp|P06744-2|G6PI_HUMAN;sp|P06744|G6PI_HUMAN;tr|A0A2U3TZU2|A0A2U3TZU2_HUMAN;tr|A0A0A0MTS2|A0A0A0MTS2_HUMAN	FALSE	151112000	166945280	163945552	199860848	217018512	196077168	0
sp|P37802|TAGL2_HUMAN;sp|P37802-2|TAGL2_HUMAN	FALSE	127249440	115238280	106293936	131285920	122875096	101273192	0
sp|P31947-2|1433S_HUMAN;sp|P31947|1433S_HUMAN	FALSE	27450752	24330846	23059902	23123752	24618656	22248110	0
tr|E9PQB7|E9PQB7_HUMAN;tr|E9PLJ3|E9PLJ3_HUMAN	FALSE	185515504	179470064	172733280	173140896	186801936	177691024	0
tr|I3L514|I3L514_HUMAN	FALSE	51480220	45731964	44388772	39909772	43519992	40392692	0
sp|P38919|IF4A3_HUMAN	FALSE	103176456	89082760	88443560	95868184	110976360	104095352	0
sp|Q8IYT4|KATL2_HUMAN;sp|Q8IYT4-2|KATL2_HUMAN;tr|K7EM02|K7EM02_HUMAN;tr|K7EIJ8|K7EIJ8_HUMAN	FALSE	33840448	24759158	24974174	21224672	26172928	23737676	0
sp|Q58FF7|H90B3_HUMAN	FALSE	265791440	361487136	353740896	328207840	370870336	314016960	0
sp|P40926|MDHM_HUMAN	FALSE	82006320	73970640	67850304	68581312	73282464	64529404	0
sp|P23526|SAHH_HUMAN;sp|P23526-2|SAHH_HUMAN	FALSE	35728132	34271176	32655768	30134106	37076464	34239796	0
sp|Q14157-1|UBP2L_HUMAN;sp|Q14157-4|UBP2L_HUMAN;tr|F8W726|F8W726_HUMAN;sp|Q14157-5|UBP2L_HUMAN;tr|Q5VU77|Q5VU77_HUMAN;sp|Q14157-3|UBP2L_HUMAN;sp|Q14157|UBP2L_HUMAN	FALSE	4.7192e+06	3467299	4.18483e+06	4424589	5012852	5.02096e+06	0
tr|G3V4N7|G3V4N7_HUMAN	FALSE	81807616	73825088	73761776	82070584	77214344	73125224	0
tr|A0A0G2JIW1|A0A0G2JIW1_HUMAN;sp|P0DMV9|HS71B_HUMAN;sp|P0DMV8|HS71A_HUMAN	FALSE	619331136	602373376	574847680	614124800	659839424	630619008	0
tr|I3L3Q7|I3L3Q7_HUMAN;sp|Q07021|C1QBP_HUMAN;tr|I3L3B0|I3L3B0_HUMAN	FALSE	94400656	149798912	164934544	157859920	188499392	167942208	0
sp|P32119-2|PRDX2_HUMAN	FALSE	68683344	56010044	60649272	61992060	67730800	63842876	0
tr|J3KRY1|J3KRY1_HUMAN;sp|P52565-2|GDIR1_HUMAN	FALSE	4312877	7832081	7.88275e+06	6589220	8288093	7.6819e+06	0.00241546
tr|Q5SX91|Q5SX91_HUMAN	FALSE	24851642	21477848	19189830	24259388	22386078	22382462	0.00462606
sp|P55060|XPO2_HUMAN;sp|P55060-3|XPO2_HUMAN	FALSE	46754720	40151620	38217172	37675472	43075580	38928640	0
sp|P27797|CALR_HUMAN	FALSE	257612128	282276000	282862272	309236928	331166272	314787264	0
tr|I3L3P5|I3L3P5_HUMAN	FALSE	4774580	8912329	9463290	8548584	13469327	11563498	0
tr|H0YEU6|H0YEU6_HUMAN	FALSE	17613488	16230910	15982651	18317190	23687864	23666710	0
sp|P06730-2|IF4E_HUMAN;sp|P06730|IF4E_HUMAN;sp|P06730-3|IF4E_HUMAN;tr|D6RBW1|D6RBW1_HUMAN	FALSE	11410287	14535008	16035884	13307844	16651135	17143636	0.00114025
sp|P05783|K1C18_HUMAN	FALSE	405269088	408423808	435657664	521577152	535560480	561979328	0
tr|D6RF44|D6RF44_HUMAN	FALSE	17931256	19252326	3.72085e+06	7.06498e+06	5338774	6.21157e+06	0
sp|P00491|PNPH_HUMAN	FALSE	13436085	11523726	10382823	14006832	12942563	12273972	0
sp|Q07666|KHDR1_HUMAN;sp|Q07666-2|KHDR1_HUMAN	FALSE	22887624	22970210	18111076	22828128	27782278	23308250	0
tr|E9PP36|E9PP36_HUMAN	FALSE	28716200	21701362	21266200	26257814	26063846	25086582	0.00241546
tr|G3V4Z6|G3V4Z6_HUMAN;tr|A0A0C4DGL4|A0A0C4DGL4_HUMAN;sp|Q01650|LAT1_HUMAN;tr|H0YJ95|H0YJ95_HUMAN;sp|Q9UM01|YLAT1_HUMAN;sp|Q92536|YLAT2_HUMAN	FALSE	102215408	91614608	91089888	100620512	106691376	99917648	0
sp|Q16629-3|SRSF7_HUMAN;sp|Q16629|SRSF7_HUMAN;sp|Q16629-2|SRSF7_HUMAN;tr|A0A0B4J1Z1|A0A0B4J1Z1_HUMAN;sp|Q16629-4|SRSF7_HUMAN;tr|C9JAB2|C9JAB2_HUMAN	FALSE	90626168	72417176	74050456	84114128	84246000	93824768	0
sp|Q15056-2|IF4H_HUMAN;sp|Q15056|IF4H_HUMAN	FALSE	45772400	42364972	43233264	53856956	51931252	56045252	0.00241546
sp|Q2VIR3|IF2GL_HUMAN;tr|H7BZU1|H7BZU1_HUMAN;sp|Q2VIR3-2|IF2GL_HUMAN	FALSE	8605706	14533480	13886979	16509367	17143064	18478268	0.00191571
tr|A0A286YFE1|A0A286YFE1_HUMAN	FALSE	27237648	27130948	31096634	31668636	24588028	15025519	0.00241546
sp|Q6NXT2|H3C_HUMAN;tr|Q5TEC6|Q5TEC6_HUMAN	FALSE	45261012	41241848	43798252	41940996	44923480	42758972	0.00191571
tr|K7EM38|K7EM38_HUMAN;tr|A0A2R8YGF8|A0A2R8YGF8_HUMAN;tr|I3L3R2|I3L3R2_HUMAN;tr|J3KT65|J3KT65_HUMAN;tr|G5E9R0|G5E9R0_HUMAN;tr|E7EVS6|E7EVS6_HUMAN	FALSE	95101608	128934800	126483880	122758720	138343024	115596280	0
sp|P14618|KPYM_HUMAN	FALSE	89585664	90392032	95382936	90981944	92760808	89670384	0
sp|P11413|G6PD_HUMAN;sp|P11413-2|G6PD_HUMAN;sp|P11413-3|G6PD_HUMAN	FALSE	21636392	20494350	16084157	16952002	20656446	18887668	0
sp|Q9BRA2|TXD17_HUMAN;tr|I3L2R6|I3L2R6_HUMAN	FALSE	16139088	13821163	13572309	13302185	16047583	16517727	0
tr|I3L404|I3L404_HUMAN;tr|E9PM36|E9PM36_HUMAN	FALSE	61045100	57576848	54194116	50827252	64458156	54797808	0
sp|Q7Z4W1|DCXR_HUMAN;tr|J3QS36|J3QS36_HUMAN;tr|J3KS22|J3KS22_HUMAN	FALSE	1.18902e+06	2.19928e+06	1.83007e+06	2560095	2.36745e+06	2417594	0.00191571
sp|P48643|TCPE_HUMAN	FALSE	67129352	63572152	67065492	65366248	65509140	61885176	0
sp|P62249|RS16_HUMAN;tr|Q6IPX4|Q6IPX4_HUMAN;tr|M0R1M5|M0R1M5_HUMAN;tr|M0QX76|M0QX76_HUMAN;tr|M0R3H0|M0R3H0_HUMAN;tr|M0R210|M0R210_HUMAN	FALSE	31147600	29239050	29043040	28670934	31318644	28916752	0
tr|I3L303|I3L303_HUMAN;tr|H3BT37|H3BT37_HUMAN;tr|H3BV27|H3BV27_HUMAN	FALSE	80648968	75268048	75629160	73262648	82126624	67247936	0
sp|Q9H361|PABP3_HUMAN	FALSE	32022452	28129250	26396582	28073642	33099392	27417360	0
sp|P61978-3|HNRPK_HUMAN	FALSE	11161580	9921615	9301777	10334016	12528133	11863652	0
sp|Q9Y617-2|SERC_HUMAN	FALSE	25570426	24187518	23602114	23378930	25185260	26032140	0
tr|H0YKN4|H0YKN4_HUMAN;tr|H0YNB8|H0YNB8_HUMAN	FALSE	34620632	60950724	58114440	55201648	66014916	64153316	0
tr|A0A087X1I3|A0A087X1I3_HUMAN;sp|P31040-3|SDHA_HUMAN	FALSE	6.47278e+06	14324312	10496302	10839517	12863725	11074650	0
tr|C9JI87|C9JI87_HUMAN	FALSE	59718004	57843560	57650736	58757768	58277928	51285648	0
sp|Q9P258|RCC2_HUMAN	FALSE	25058710	24147028	21924012	24303302	29068210	22959698	0
sp|Q15102|PA1B3_HUMAN;tr|M0R389|M0R389_HUMAN	FALSE	5.66782e+06	4.76911e+06	3868310	5.58131e+06	4.68311e+06	4.56529e+06	0.00241546
sp|O60869-2|EDF1_HUMAN;sp|O60869|EDF1_HUMAN;sp|O60869-3|EDF1_HUMAN	FALSE	44320840	30198704	50455916	53582256	56382004	44977600	0
tr|H7BXJ5|H7BXJ5_HUMAN;tr|F2Z2W6|F2Z2W6_HUMAN;tr|F2Z2Y5|F2Z2Y5_HUMAN;tr|A6NEL0|A6NEL0_HUMAN;sp|P05114|HMGN1_HUMAN	FALSE	6.26409e+06	6.77582e+06	6342832	5006824	7280990	5.29079e+06	0.00241546
sp|P68363|TBA1B_HUMAN	FALSE	200061472	187397920	188531392	201794672	200855888	191381312	0
sp|P08729|K2C7_HUMAN	FALSE	13841091	13232124	12271585	13687486	14353313	13421608	0
tr|J3QQP0|J3QQP0_HUMAN	FALSE	106659472	107162224	94534672	104174352	114733576	103935728	0.00114025
sp|P09382|LEG1_HUMAN	FALSE	146363712	188850688	191366656	205421648	221342784	207633216	0
tr|E5RJX2|E5RJX2_HUMAN	FALSE	54426904	55130684	64521000	58330152	67497408	59691068	0
tr|A0A0A0MRM9|A0A0A0MRM9_HUMAN;sp|Q14978|NOLC1_HUMAN;sp|Q14978-2|NOLC1_HUMAN;sp|Q14978-3|NOLC1_HUMAN	FALSE	21204154	17706176	14649487	12575943	12547600	12235736	0
tr|E9PPV6|E9PPV6_HUMAN	FALSE	15915374	15787355	15420903	15172225	17482180	14022652	0.00241546
tr|A0A286YFF3|A0A286YFF3_HUMAN;tr|A0A286YFK5|A0A286YFK5_HUMAN	FALSE	181742448	100422696	90349696	93162224	80321464	75550072	0
sp|P23497|SP100_HUMAN	FALSE	12936470	12177169	12316217	10977757	11831685	13022848	0.00241546
tr|E7ERA2|E7ERA2_HUMAN	FALSE	8.05973e+06	16791928	18539736	20038936	23440872	20468380	0.00241546
sp|P15170-3|ERF3A_HUMAN;sp|P15170-2|ERF3A_HUMAN;sp|P15170|ERF3A_HUMAN;tr|H3BR35|H3BR35_HUMAN	FALSE	14916796	12373267	12617806	12361734	13457617	12907995	0
sp|A6NHL2-2|TBAL3_HUMAN;sp|A6NHL2|TBAL3_HUMAN	FALSE	88535120	104457448	91195552	118638688	120669784	125404128	0.00191571
sp|P36871|PGM1_HUMAN;tr|A0A3B3ITK7|A0A3B3ITK7_HUMAN	FALSE	22906972	22658112	20470366	23269910	23781414	23414006	0
sp|Q13011|ECH1_HUMAN;tr|M0R248|M0R248_HUMAN	FALSE	30278370	24333604	27880044	25880324	26168450	31051908	0
tr|H0YH80|H0YH80_HUMAN	FALSE	210061744	209190032	198273920	211025312	224045344	217765008	0
tr|J3QLK0|J3QLK0_HUMAN;tr|J3KSC4|J3KSC4_HUMAN;sp|P60763|RAC3_HUMAN;sp|P63000-2|RAC1_HUMAN;sp|P63000|RAC1_HUMAN	FALSE	10587767	14074541	13473616	15772537	17488748	17483158	0.00191571
sp|Q14568|HS902_HUMAN	FALSE	8180608	5.57526e+06	8.35699e+06	9308232	9336903	7778342	0
tr|E9PEF9|E9PEF9_HUMAN	FALSE	12307872	10997442	9228568	8919938	11392128	10800800	0
sp|P55060-4|XPO2_HUMAN	FALSE	8611467	8255833	8106261	13053567	9972342	12010472	0.00191571
tr|F8W026|F8W026_HUMAN	FALSE	389850752	336059936	174314464	224043376	234110336	219126896	0
sp|P00338-3|LDHA_HUMAN;sp|P00338|LDHA_HUMAN	FALSE	163153280	150263216	144716016	160598080	173736800	156163264	0
tr|F8VYN5|F8VYN5_HUMAN	FALSE	27519236	37778884	38869680	33863512	47467916	40418576	0
tr|A0A286YFL2|A0A286YFL2_HUMAN;tr|A0A286YFA2|A0A286YFA2_HUMAN	FALSE	58663088	49205532	52012496	48803112	51169984	50949920	0.00191571
sp|Q15651-2|HMGN3_HUMAN;sp|Q15651|HMGN3_HUMAN;tr|A0A087WZE9|A0A087WZE9_HUMAN	FALSE	10207038	11060020	12296878	12091670	15436295	15632843	0.00241546
tr|K7ES31|K7ES31_HUMAN;tr|K7EQM4|K7EQM4_HUMAN;sp|Q9UBQ5-2|EIF3K_HUMAN;sp|Q9UBQ5|EIF3K_HUMAN;tr|K7ERF1|K7ERF1_HUMAN;tr|A0A087WVB9|A0A087WVB9_HUMAN	FALSE	3.90544e+06	9320955	7397833	6.30876e+06	9105509	7.20137e+06	0
sp|Q9UHD1-2|CHRD1_HUMAN;sp|Q9UHD1|CHRD1_HUMAN	FALSE	60401076	54894588	64089348	60426332	11063715	16486456	0.00241546
tr|M0R1H5|M0R1H5_HUMAN	FALSE	8404626	20698392	21321852	16169706	20713172	17714460	0
tr|V9GYY3|V9GYY3_HUMAN;sp|P11586|C1TC_HUMAN;tr|F5H2F4|F5H2F4_HUMAN	FALSE	8.03271e+06	8533510	7366998	8438624	7.72123e+06	8965048	0.00191571
sp|O96000-2|NDUBA_HUMAN;tr|H3BV16|H3BV16_HUMAN	FALSE	8711751	8973564	9085571	10372399	9876279	9397019	0.00191571
tr|H0YL33|H0YL33_HUMAN;tr|H0YN28|H0YN28_HUMAN	FALSE	29956718	26243552	35652372	29997272	39403916	34579964	0
tr|B5MCP9|B5MCP9_HUMAN	FALSE	15152861	13205715	12231266	12996089	14089619	15096430	0.00241546
sp|P08670|VIME_HUMAN	FALSE	314105920	416490112	400845952	416529088	450926912	421796992	0
tr|K7EME0|K7EME0_HUMAN	FALSE	63200596	118079880	47386460	127976552	48834848	128968968	0.00462606
sp|P46783|RS10_HUMAN	FALSE	25469366	23546522	23235606	23471136	28111368	23176464	0
tr|H0YK49|H0YK49_HUMAN	FALSE	23597964	20108868	19917360	18683916	22773024	20975806	0
tr|K7ER39|K7ER39_HUMAN;tr|K7EL96|K7EL96_HUMAN	FALSE	9805967	7.78784e+06	7304186	7563603	9827412	11652932	0
tr|H0Y9V9|H0Y9V9_HUMAN	FALSE	101486432	86894192	88379664	82089720	102580280	87102312	0
tr|R4GMX5|R4GMX5_HUMAN	FALSE	38412784	37803832	37726892	37773732	41750160	39926820	0.00191571
tr|J3KRY3|J3KRY3_HUMAN;tr|S4R3P3|S4R3P3_HUMAN	FALSE	7.00898e+06	12880715	12317256	10032775	13566749	10784092	0.00241546
sp|P22626|ROA2_HUMAN	FALSE	347010304	295131648	312182592	331580448	344254144	328037088	0
sp|P23381-2|SYWC_HUMAN;sp|P23381|SYWC_HUMAN	FALSE	3969878	6.61153e+06	6.8376e+06	6.90175e+06	8475254	7718320	0.00191571
tr|H7C1H2|H7C1H2_HUMAN	FALSE	13044865	12413589	13558387	15565343	16980310	16519965	0
tr|A0A0U1RRG3|A0A0U1RRG3_HUMAN	FALSE	20178600	41640080	40926888	38143816	45669092	59956328	0
sp|Q6DN03|H2B2C_HUMAN;sp|Q6DRA6|H2B2D_HUMAN	FALSE	440803808	436817248	410651904	499310528	541196864	545839552	0
tr|E5RIP5|E5RIP5_HUMAN;tr|E5RHS5|E5RHS5_HUMAN;tr|E5RII3|E5RII3_HUMAN;tr|E5RJ25|E5RJ25_HUMAN	FALSE	4665350	6.66054e+06	8181896	7987598	9888806	7604137	0.00241546
sp|P61604|CH10_HUMAN	FALSE	210153888	180082096	181515680	181056400	205900432	190734448	0
tr|D6RDG3|D6RDG3_HUMAN;sp|P20290-2|BTF3_HUMAN	FALSE	34062536	35479844	37185936	32534298	42510992	38887412	0
tr|Q5R211|Q5R211_HUMAN	FALSE	162804368	135962672	143263280	137767472	147868080	142434848	0
sp|P62906|RL10A_HUMAN	FALSE	239984096	241405888	223847840	226107440	256055264	242925744	0
tr|F5H136|F5H136_HUMAN;tr|F5H676|F5H676_HUMAN	FALSE	23671436	35144760	39011788	32747852	34984336	35186804	0
tr|Q5T5C7|Q5T5C7_HUMAN;sp|P49591|SYSC_HUMAN	FALSE	21510968	19851034	19131220	19501090	21216620	20193664	0
sp|Q14344|GNA13_HUMAN;sp|Q03113|GNA12_HUMAN	FALSE	22257004	16895564	18853380	17092200	18600478	16566186	0.00241546
tr|E9PK06|E9PK06_HUMAN	FALSE	8973139	13669179	12891536	12432253	13005596	11838035	0.00191571
tr|G3V2H6|G3V2H6_HUMAN	FALSE	105728944	86732640	93474432	100537808	104299984	102345936	0
tr|H3BT13|H3BT13_HUMAN	FALSE	6323324	36053864	28361792	29848120	35133012	35104928	0.00241546
tr|F5GY37|F5GY37_HUMAN;tr|F5H3X6|F5H3X6_HUMAN;tr|F5GWA7|F5GWA7_HUMAN	FALSE	18527894	17284328	21717222	21668848	25146304	23729120	0.00462606
sp|O43861-2|ATP9B_HUMAN;tr|A0A0J9YYD2|A0A0J9YYD2_HUMAN;tr|K7EJG1|K7EJG1_HUMAN;tr|K7ERE0|K7ERE0_HUMAN;sp|O43861|ATP9B_HUMAN;tr|K7EPH4|K7EPH4_HUMAN;tr|B4DJ94|B4DJ94_HUMAN;tr|A0A0G2JNU9|A0A0G2JNU9_HUMAN	FALSE	7.05766e+06	7.0571e+06	6809528	5650572	8.24952e+06	9111353	0
tr|E7EQR4|E7EQR4_HUMAN;sp|P15311|EZRI_HUMAN	FALSE	42181568	46219820	46727816	41737248	45402356	40150344	0
sp|P23588|IF4B_HUMAN;sp|P23588-2|IF4B_HUMAN;tr|E7EX17|E7EX17_HUMAN	FALSE	33324124	30564498	27851042	32113986	31708842	34017976	0
tr|I3L398|I3L398_HUMAN	FALSE	17465050	31272956	28755560	28551346	34453128	30241332	0.00241546
sp|Q08043|ACTN3_HUMAN;tr|G3V2X9|G3V2X9_HUMAN;tr|A0A087WSZ2|A0A087WSZ2_HUMAN;tr|G3V2N5|G3V2N5_HUMAN	FALSE	10897522	16392227	13120430	16287262	12094520	10417317	0.00241546
sp|P62304|RUXE_HUMAN	FALSE	7.51127e+06	7.64387e+06	6.57366e+06	7.7781e+06	7688370	5.98035e+06	0.00241546
tr|C9JLS9|C9JLS9_HUMAN;sp|P35998|PRS7_HUMAN	FALSE	13981624	11202244	10947244	12777670	13560863	11391541	0
tr|E9PJT3|E9PJT3_HUMAN;sp|Q13435|SF3B2_HUMAN;tr|E9PPJ0|E9PPJ0_HUMAN;tr|E9PJ04|E9PJ04_HUMAN;tr|H0YCG1|H0YCG1_HUMAN	FALSE	12205809	9664897	14122368	16050789	10871591	12368859	0.00191571
tr|B1AHC9|B1AHC9_HUMAN	FALSE	17424238	30534204	32987596	31320550	38056944	32471354	0.00191571
tr|A0A0U1RQF0|A0A0U1RQF0_HUMAN	FALSE	1162306176	1050076480	1001287552	963484544	1011123008	942180992	0
sp|Q8NC51-2|PAIRB_HUMAN	FALSE	24103024	24723654	28373222	18190370	26132610	20202856	0
sp|P23246|SFPQ_HUMAN	FALSE	116790624	98076368	92111016	88036408	105405296	105782248	0
tr|D6RAA2|D6RAA2_HUMAN;tr|D6RDB2|D6RDB2_HUMAN;tr|D6RD69|D6RD69_HUMAN;sp|Q9NR31|SAR1A_HUMAN;tr|X1WI22|X1WI22_HUMAN;sp|Q9Y6B6|SAR1B_HUMAN;tr|Q5SQT8|Q5SQT8_HUMAN	FALSE	12137178	9817418	10639498	11974521	12040947	10414912	0
tr|A8K7Q2|A8K7Q2_HUMAN	FALSE	51339564	92509856	85181136	90117464	159606080	106019792	0
sp|P30101|PDIA3_HUMAN	FALSE	215352528	194132272	197061216	186847984	220167776	244929184	0
tr|A0A0A0MSU9|A0A0A0MSU9_HUMAN;sp|Q9Y266|NUDC_HUMAN;tr|A0A0A0MSS4|A0A0A0MSS4_HUMAN	FALSE	6978634	29465530	29368398	28497472	46639120	39195440	0
tr|J3KMX5|J3KMX5_HUMAN;sp|P62277|RS13_HUMAN	FALSE	99238768	90369760	97103568	88435360	104323456	103451600	0
sp|P17066|HSP76_HUMAN	FALSE	41023404	34358244	33639624	45819960	43927536	39979744	0.00191571
sp|Q9H4B7|TBB1_HUMAN	FALSE	105740328	28246594	37033152	40701808	35329248	36121600	0
tr|K7EN27|K7EN27_HUMAN	FALSE	48111080	39680440	42768680	36282160	46424920	44401292	0.00191571
tr|H7BY16|H7BY16_HUMAN	FALSE	252660688	207758448	197223696	210209936	213837232	211226480	0
sp|P61981|1433G_HUMAN	FALSE	63087228	57076864	52292780	52503044	58584904	53996836	0
sp|Q99832-3|TCPH_HUMAN	FALSE	81842608	77433576	75583080	76225888	83972280	72950600	0
tr|Q68E03|Q68E03_HUMAN	FALSE	7150799	10889287	11591801	11587999	13076415	11347533	0
sp|P11142|HSP7C_HUMAN;tr|E9PKE3|E9PKE3_HUMAN	FALSE	17746454	14594258	13408740	16701006	15276040	13851669	0
tr|Q5JRR6|Q5JRR6_HUMAN	FALSE	68280448	82708680	79012056	61614272	67943568	64942424	0
sp|Q99729-2|ROAA_HUMAN;tr|D6RD18|D6RD18_HUMAN;sp|Q99729-3|ROAA_HUMAN;tr|D6R9P3|D6R9P3_HUMAN;tr|D6RBZ0|D6RBZ0_HUMAN	FALSE	50269708	36523936	34312900	32306792	36092180	29957736	0
tr|K7EJH8|K7EJH8_HUMAN	FALSE	23359154	26201436	27928760	28170950	31032286	31227222	0
tr|K7ERX7|K7ERX7_HUMAN	FALSE	40763636	34488556	37911640	36750428	43689508	38391448	0.00191571
tr|F5H0E2|F5H0E2_HUMAN	FALSE	27169264	25649670	27938494	29191734	29277174	28148704	0
tr|D6RF62|D6RF62_HUMAN	FALSE	13702758	18900750	18683588	17149910	18943668	18170080	0
tr|B4DV51|B4DV51_HUMAN	FALSE	92154008	88653080	79624560	109544472	114554264	110019632	0
sp|P04908|H2A1B_HUMAN;sp|Q93077|H2A1C_HUMAN;sp|Q7L7L0|H2A3_HUMAN	FALSE	260029728	223393712	230392928	236369728	253028112	222733056	0
sp|Q15691|MARE1_HUMAN	FALSE	9472017	9121147	8983456	9658567	10774995	10965204	0.00191571
tr|C9K028|C9K028_HUMAN	FALSE	104291408	85289392	95903048	89424272	103573024	93359752	0
sp|B5ME19|EIFCL_HUMAN;sp|Q99613-2|EIF3C_HUMAN;sp|Q99613|EIF3C_HUMAN	FALSE	6.00608e+06	5.09153e+06	5499921	7053863	7.54875e+06	5899871	0
sp|P00558-2|PGK1_HUMAN	FALSE	183724304	226256560	209688784	249895104	246314112	244639440	0
sp|O15212|PFD6_HUMAN;tr|A2AB88|A2AB88_HUMAN	FALSE	9197065	7544759	7341910	7.62313e+06	8147057	8.04412e+06	0.00191571
tr|J3KRZ1|J3KRZ1_HUMAN	FALSE	10099143	10887696	9180016	11822438	13678575	12087003	0
sp|P62318-2|SMD3_HUMAN;sp|P62318|SMD3_HUMAN	FALSE	15636732	14422583	13533047	14058878	15274055	12699222	0
sp|P68036|UB2L3_HUMAN;sp|P68036-3|UB2L3_HUMAN;sp|P68036-2|UB2L3_HUMAN	FALSE	24502374	23401720	21294440	20316422	23589446	21885162	0
tr|A0A1W2PPS1|A0A1W2PPS1_HUMAN;sp|Q00839-2|HNRPU_HUMAN;sp|Q00839|HNRPU_HUMAN	FALSE	34553932	29001744	33759904	28232714	32681524	32366262	0
sp|O15427|MOT4_HUMAN	FALSE	12039569	19402092	18249346	16360666	19479246	16204857	0
sp|Q6PKG0-3|LARP1_HUMAN;tr|H0YBW1|H0YBW1_HUMAN;tr|A0A0B4J210|A0A0B4J210_HUMAN;sp|Q6PKG0|LARP1_HUMAN;tr|E5RHK4|E5RHK4_HUMAN;tr|H0YAN4|H0YAN4_HUMAN;tr|E5RH50|E5RH50_HUMAN	FALSE	2.80692e+06	2.71439e+06	2.39793e+06	2719822	2.60282e+06	2.76707e+06	0.00684932
sp|P26373|RL13_HUMAN	FALSE	34661020	29348104	27144336	31667592	31698762	32151736	0
tr|J3QSB5|J3QSB5_HUMAN;sp|Q9Y3U8|RL36_HUMAN	FALSE	39756276	66500992	52910252	66883488	68917536	81888096	0
sp|Q99832|TCPH_HUMAN	FALSE	7429984	13133429	9766976	14904976	16762690	17374992	0.00462606
sp|P30613-2|KPYR_HUMAN;sp|P30613|KPYR_HUMAN	FALSE	228312016	194736064	195268848	192565968	212110512	195954304	0
sp|P17096-3|HMGA1_HUMAN;sp|P17096|HMGA1_HUMAN	FALSE	36983100	38455304	35432172	29633316	42250832	37907932	0
sp|Q96DG6|CMBL_HUMAN	FALSE	19496988	24882974	31320566	28222950	38754836	34482160	0
tr|F5H282|F5H282_HUMAN;tr|E7EQR6|E7EQR6_HUMAN	FALSE	107190040	90141616	93939992	101603656	102344040	99448968	0
sp|P04083|ANXA1_HUMAN;tr|Q5T3N1|Q5T3N1_HUMAN	FALSE	10482609	8235704	8.30678e+06	8774647	8584230	8691983	0.00241546
tr|H0Y4R1|H0Y4R1_HUMAN;sp|P12268|IMDH2_HUMAN	FALSE	99183664	127139160	112440584	107714456	128466000	122430624	0
tr|H3BVC7|H3BVC7_HUMAN	FALSE	34235572	32229020	15769215	14578863	15330877	16353566	0.00462606
tr|F8WEA1|F8WEA1_HUMAN	FALSE	4628437	4.4515e+06	4.34767e+06	5566396	6.55164e+06	5.19274e+06	0.00191571
tr|A0A0C4DG17|A0A0C4DG17_HUMAN;tr|C9J9K3|C9J9K3_HUMAN;sp|P08865|RSSA_HUMAN	FALSE	130206488	181667488	186486352	202990848	245138160	223843696	0
sp|P62273-2|RS29_HUMAN;tr|A0A2R8Y851|A0A2R8Y851_HUMAN;sp|P62273|RS29_HUMAN	FALSE	8525388	35202296	33593464	25526034	42157720	36291092	0.00241546
sp|Q14847|LASP1_HUMAN;sp|Q14847-2|LASP1_HUMAN;tr|C9J9W2|C9J9W2_HUMAN	FALSE	12035145	10280587	11047734	11197168	13792977	12412269	0
tr|A0A075B724|A0A075B724_HUMAN	FALSE	45615132	42405788	38904796	42391068	48114728	35806400	0.00191571
tr|H3BRW8|H3BRW8_HUMAN;sp|Q9P1Z2-4|CACO1_HUMAN;sp|Q9P1Z2-3|CACO1_HUMAN;sp|Q9P1Z2|CACO1_HUMAN	FALSE	7.75616e+06	125438056	203321280	221552880	28378574	685867	0.00537222
tr|F8VZS0|F8VZS0_HUMAN	FALSE	70784432	67468640	69097416	69905952	76644768	67645552	0
sp|P06733|ENOA_HUMAN	FALSE	302656352	321320896	317677536	371884640	397405056	392007040	0
tr|F8VRK7|F8VRK7_HUMAN;tr|F8VQY6|F8VQY6_HUMAN	FALSE	65680956	71018880	71010336	77082352	79244888	84606920	0
sp|P50991-2|TCPD_HUMAN;sp|P50991|TCPD_HUMAN	FALSE	119157272	135400240	137964704	143956352	162847552	156933616	0
sp|P48047|ATPO_HUMAN	FALSE	13415292	14664646	13639496	15214323	14898551	13308076	0
sp|Q92945|FUBP2_HUMAN;tr|A0A087WTP3|A0A087WTP3_HUMAN	FALSE	33279222	41601824	42928780	44384816	45780036	40593436	0
XXX_sp|Q96P44|COLA1_HUMAN;XXX_sp|Q96P44-3|COLA1_HUMAN;XXX_tr|F5GZK2|F5GZK2_HUMAN	TRUE	28787938	19833824	21177266	19454558	19149552	0	0.00537222
tr|D6RBD0|D6RBD0_HUMAN	FALSE	14940897	29517736	25259566	27487982	30673446	30436112	0.00241546
sp|P15121|ALDR_HUMAN;tr|E9PCX2|E9PCX2_HUMAN	FALSE	22597474	32399400	29098714	26952458	32392286	34172844	0
tr|F5H423|F5H423_HUMAN;sp|P84077|ARF1_HUMAN;tr|F5H0C7|F5H0C7_HUMAN;sp|P61204|ARF3_HUMAN	FALSE	5609180	4987156	5275386	5.55214e+06	4133449	5.20112e+06	0
tr|G3V279|G3V279_HUMAN	FALSE	5227148	9399286	7.52987e+06	7.84105e+06	9503195	7.12068e+06	0
sp|P22314-2|UBA1_HUMAN;sp|P22314|UBA1_HUMAN	FALSE	222371200	201865056	198362960	208616896	217472880	207608256	0
sp|Q92616|GCN1_HUMAN	FALSE	6.05472e+06	6.57251e+06	7038793	5.95396e+06	6.43525e+06	6.85104e+06	0
sp|Q9UBR2|CATZ_HUMAN	FALSE	18791110	19029212	18781540	23575208	22733796	20322340	0.00191571
sp|P62995|TRA2B_HUMAN;sp|P62995-3|TRA2B_HUMAN;tr|H7BXF3|H7BXF3_HUMAN;tr|H7C2L4|H7C2L4_HUMAN	FALSE	2.4892e+06	2176495	1.91928e+06	1.85911e+06	2.16122e+06	1.96948e+06	0.00191571
sp|P22102|PUR2_HUMAN	FALSE	12243619	13611546	5141745	18103740	12350303	14935368	0.00191571
tr|H3BN98|H3BN98_HUMAN;tr|I3L246|I3L246_HUMAN	FALSE	46853940	48050604	43009764	47792280	50646344	47564644	0
sp|Q9UQ80|PA2G4_HUMAN;sp|Q9UQ80-2|PA2G4_HUMAN	FALSE	151029792	136153472	139196384	173695344	175746864	159403808	0
tr|G3V1A1|G3V1A1_HUMAN	FALSE	35876372	52806056	54849188	56773428	68296600	60949128	0
sp|Q13155|AIMP2_HUMAN;tr|A8MU58|A8MU58_HUMAN;sp|Q13155-2|AIMP2_HUMAN	FALSE	3.74937e+06	8976157	8529044	7379508	8941662	9458567	0.00241546
tr|K7EJT5|K7EJT5_HUMAN	FALSE	93438872	78266896	75594952	79934816	87777504	82653128	0
sp|Q12931-2|TRAP1_HUMAN;sp|Q12931|TRAP1_HUMAN;tr|I3L0K7|I3L0K7_HUMAN	FALSE	61483676	56379528	62695608	55619744	70627176	64160160	0.00191571
tr|E9PFF2|E9PFF2_HUMAN	FALSE	198136896	317384288	304686784	251941840	307015648	309782304	0
sp|P12004|PCNA_HUMAN	FALSE	84938288	89464328	94966936	88140832	106035656	99949216	0
sp|P31946|1433B_HUMAN;sp|P31946-2|1433B_HUMAN	FALSE	31148008	42216784	38803124	39317352	41725424	41500092	0
tr|F2Z388|F2Z388_HUMAN	FALSE	35406624	35356536	34447432	39054052	38467420	36829028	0
tr|A0A0D9SFE5|A0A0D9SFE5_HUMAN	FALSE	6.0416e+06	12052271	12856594	11399992	15963369	12897623	0
tr|H0YB80|H0YB80_HUMAN;tr|B7Z2E6|B7Z2E6_HUMAN	FALSE	225885056	191129504	181467040	168388784	193293616	163463552	0
tr|C9JTX5|C9JTX5_HUMAN	FALSE	789665472	764000256	799153216	880567168	894397312	821275008	0
tr|H0YJK0|H0YJK0_HUMAN	FALSE	42250200	45593180	41003368	37327716	48876204	50224336	0.00114025
sp|Q9UBQ0|VPS29_HUMAN;tr|F8VXU5|F8VXU5_HUMAN;sp|Q9UBQ0-2|VPS29_HUMAN	FALSE	21705630	19565988	18145194	19041510	20236188	17061780	0
sp|P41219-2|PERI_HUMAN;tr|H7C5W5|H7C5W5_HUMAN;sp|P41219|PERI_HUMAN	FALSE	49207340	43311668	47286176	50429660	51746624	46021960	0
tr|H0YBN4|H0YBN4_HUMAN	FALSE	19519304	21457720	25922540	20853616	25688216	24288512	0
tr|G3V448|G3V448_HUMAN;sp|Q9H3N1|TMX1_HUMAN	FALSE	45018772	32949848	481273	14441748	14285737	4715283	0.00462606
sp|P29966|MARCS_HUMAN	FALSE	9030013	8905499	9226009	9475112	11133396	9752542	0
sp|P21333-2|FLNA_HUMAN;tr|Q60FE5|Q60FE5_HUMAN;sp|P21333|FLNA_HUMAN	FALSE	56222564	59110768	75318584	67760704	85413280	79243880	0
sp|Q16658|FSCN1_HUMAN	FALSE	291986688	290312928	284823072	279856128	282421984	272622208	0
tr|C9JSZ1|C9JSZ1_HUMAN	FALSE	12824817	12717953	13404809	11082621	10128091	8.33059e+06	0
sp|P54577|SYYC_HUMAN	FALSE	25906552	24170460	26340758	27351640	27840346	25890464	0
tr|H7C2U2|H7C2U2_HUMAN	FALSE	7969665	22551402	26469900	14832163	24378494	28044254	0.00241546
sp|Q96EP5|DAZP1_HUMAN;tr|K7EK33|K7EK33_HUMAN;sp|Q96EP5-2|DAZP1_HUMAN;tr|K7EQ55|K7EQ55_HUMAN;tr|K7EQ02|K7EQ02_HUMAN	FALSE	2775989	2.47093e+06	2.74151e+06	3.48866e+06	2.835e+06	2762683	0.00241546
tr|U3KPS5|U3KPS5_HUMAN	FALSE	36526976	69028160	70111784	66671480	79867336	77298632	0
tr|A0A2R8Y4L2|A0A2R8Y4L2_HUMAN	FALSE	54366804	118345672	131383968	110823896	141395408	111011136	0
tr|J3KNE3|J3KNE3_HUMAN;sp|P68402|PA1B2_HUMAN	FALSE	3.96177e+06	4.34281e+06	3.7651e+06	4827965	4.28547e+06	3649686	0.00241546
sp|P0DPH7-2|TBA3C_HUMAN	FALSE	41141544	47270272	46721320	51285168	56234092	50267584	0
sp|Q9BUF5|TBB6_HUMAN;tr|K7ESM5|K7ESM5_HUMAN	FALSE	131847536	111855896	110998280	137029904	127188016	111924216	0.00191571
tr|A0A2R8Y623|A0A2R8Y623_HUMAN;sp|P62081|RS7_HUMAN	FALSE	14442793	12099857	11851253	19951350	15661680	12161759	0.00191571
tr|E9PEX6|E9PEX6_HUMAN;sp|P09622-3|DLDH_HUMAN;sp|P09622-2|DLDH_HUMAN;sp|P09622|DLDH_HUMAN	FALSE	7154649	9168381	7.68601e+06	8.09189e+06	9871621	8741089	0
sp|P63104-2|1433Z_HUMAN	FALSE	47298996	42401272	43003772	45743528	42457752	38883824	0
tr|H7BZ94|H7BZ94_HUMAN	FALSE	27506412	24853480	22441752	22998336	25497120	24217732	0
tr|M0R1H6|M0R1H6_HUMAN	FALSE	37557324	31703030	34861828	26730884	34457436	27855382	0
tr|Q5JR01|Q5JR01_HUMAN;tr|A6PW80|A6PW80_HUMAN	FALSE	279700736	448911168	444953408	434438368	511256896	487675968	0
sp|P00338-4|LDHA_HUMAN	FALSE	293443680	340106048	320384288	344819552	366530656	332025984	0
sp|P52209|6PGD_HUMAN;sp|P52209-2|6PGD_HUMAN;tr|K7EPF6|K7EPF6_HUMAN;tr|K7EMN2|K7EMN2_HUMAN;tr|K7EM49|K7EM49_HUMAN	FALSE	20833942	20942344	20431188	25849982	27578612	19380026	0
sp|Q99497|PARK7_HUMAN;tr|K7ELW0|K7ELW0_HUMAN	FALSE	142034352	130105200	138471264	141874896	144644080	141632384	0
tr|A6NLM8|A6NLM8_HUMAN;sp|P51571|SSRD_HUMAN	FALSE	16729657	17457618	14286245	18581122	18076478	20881914	0
sp|P49748|ACADV_HUMAN;sp|P49748-3|ACADV_HUMAN;sp|P49748-2|ACADV_HUMAN	FALSE	9528057	11028768	9790988	8778982	10130994	8979082	0
tr|D6REM6|D6REM6_HUMAN	FALSE	10857523	10088763	10009777	10163397	11608923	11144847	0.00241546
sp|Q15293-2|RCN1_HUMAN;sp|Q15293|RCN1_HUMAN	FALSE	14684946	12764764	32969234	33070834	35595340	34731668	0
sp|P35232|PHB_HUMAN;tr|C9JW96|C9JW96_HUMAN	FALSE	30152720	29325288	27650670	33882460	32990838	35410988	0.00241546
tr|Q5TCD1|Q5TCD1_HUMAN	FALSE	1.68029e+06	5036565	5380049	4520065	5981320	5195522	0.00191571
tr|A0A3B3IS95|A0A3B3IS95_HUMAN	FALSE	118966048	183031392	170591424	161979664	205568544	183731872	0
tr|A0A0A0MRL0|A0A0A0MRL0_HUMAN	FALSE	19889318	18450664	20312542	16567351	18483938	20263320	0
tr|H3BPK7|H3BPK7_HUMAN	FALSE	16153391	15528430	21579386	22752788	25387790	27945432	0.00241546
sp|Q96SI9|STRBP_HUMAN;sp|Q96SI9-2|STRBP_HUMAN	FALSE	14598510	12438099	11340078	14007877	14596454	14448419	0
tr|F5H018|F5H018_HUMAN	FALSE	98890896	146218944	145941776	157333568	186532160	172807232	0
tr|M0R0R2|M0R0R2_HUMAN	FALSE	28453384	34330136	32489244	37743160	38064148	38467560	0
tr|H7C144|H7C144_HUMAN	FALSE	18084116	14917196	11138319	29469054	45765412	35631260	0
tr|A0A0B4J269|A0A0B4J269_HUMAN	FALSE	672593984	611112256	600884544	672625792	681984576	645826816	0
tr|G5E9R3|G5E9R3_HUMAN	FALSE	21358328	33000080	28076766	33666796	40469820	36802536	0
sp|O60361|NDK8_HUMAN	FALSE	130882208	159502448	146726352	150298192	156536976	153694352	0
sp|Q8NC51-3|PAIRB_HUMAN	FALSE	21466284	22603714	21238724	27591102	28945844	25025088	0
sp|P05787|K2C8_HUMAN;sp|P05787-2|K2C8_HUMAN	FALSE	904552320	797982336	769047424	772086912	825576128	750781312	0
tr|K7ELC2|K7ELC2_HUMAN;tr|S4R417|S4R417_HUMAN;sp|P62841|RS15_HUMAN;tr|A0A0B4J2B4|A0A0B4J2B4_HUMAN;tr|K7EQJ5|K7EQJ5_HUMAN;tr|K7EM56|K7EM56_HUMAN	FALSE	39045596	42219988	37815944	37310724	40264412	44191864	0
sp|B2RPK0|HGB1A_HUMAN	FALSE	35263304	62877152	63100464	58269672	78073480	66823044	0
tr|B4DT28|B4DT28_HUMAN;sp|O43390-3|HNRPR_HUMAN	FALSE	26133314	23093178	25914330	22228866	29478824	26917656	0
tr|M0R2T4|M0R2T4_HUMAN	FALSE	52021384	97953632	95178976	108046856	133269112	122197352	0
sp|O75533|SF3B1_HUMAN	FALSE	4877825	4.49208e+06	4674658	4.87983e+06	4591990	4767175	0
tr|B5MDF5|B5MDF5_HUMAN;sp|P62826|RAN_HUMAN;tr|J3KQE5|J3KQE5_HUMAN	FALSE	26046010	32188038	25615624	30266730	34125944	29435130	0
sp|P49458|SRP09_HUMAN	FALSE	18287596	15696065	15760370	16199208	20248878	17954424	0
sp|P13010|XRCC5_HUMAN	FALSE	55921208	69641632	63098984	75679408	80031272	73626160	0
tr|V9GYG0|V9GYG0_HUMAN	FALSE	7767406	7940627	6.98749e+06	6.06556e+06	8.04653e+06	6383844	0.00241546
sp|P50395-2|GDIB_HUMAN;sp|P50395|GDIB_HUMAN	FALSE	36615544	30155594	30296080	31881776	35372672	29642676	0
sp|P30050|RL12_HUMAN	FALSE	95939688	82960832	76748560	79703232	92600416	88225520	0
tr|C9K025|C9K025_HUMAN;tr|F8WBS5|F8WBS5_HUMAN;tr|F8WB72|F8WB72_HUMAN;sp|P18077|RL35A_HUMAN	FALSE	40410356	39968556	39972508	45866108	58952092	50300020	0
XXX_sp|O14990|IPP2C_HUMAN	TRUE	1707219	0	0	0	0	0	0.00611154
sp|P60903|S10AA_HUMAN	FALSE	39562960	33936652	38522092	38922276	42176096	36296548	0
tr|H0Y8S0|H0Y8S0_HUMAN	FALSE	44571000	37111608	41419480	41546244	39511760	35894648	0
tr|G3V3W4|G3V3W4_HUMAN;sp|P25788|PSA3_HUMAN;tr|G3V5N4|G3V5N4_HUMAN;sp|P25788-2|PSA3_HUMAN	FALSE	8347579	72144072	63819584	63640276	65681928	68196440	0.00241546
sp|P62857|RS28_HUMAN	FALSE	27448412	24926648	26764872	29692446	28992784	27326016	0.00191571
sp|Q15181|IPYR_HUMAN	FALSE	41233932	38319044	32565742	26220074	27549914	26799098	0
tr|J3QLE5|J3QLE5_HUMAN;sp|P63162|RSMN_HUMAN;sp|P14678-3|RSMB_HUMAN;sp|P14678-2|RSMB_HUMAN;sp|P63162-2|RSMN_HUMAN;sp|P14678|RSMB_HUMAN	FALSE	45026088	37825780	38549652	42333088	46915424	38192712	0
sp|P09874|PARP1_HUMAN	FALSE	15610637	11883851	14086783	16889900	19589088	16279216	0.00191571
sp|Q92526-3|TCPW_HUMAN;sp|Q92526|TCPW_HUMAN	FALSE	18337212	14052776	15265220	15702592	16107854	13616306	0.00241546
tr|H0YI37|H0YI37_HUMAN	FALSE	38251736	53838412	58564884	59847608	74074992	73003392	0.00191571
tr|K7ERC6|K7ERC6_HUMAN	FALSE	10005687	7384146	7.08127e+06	6.88892e+06	8460014	7014759	0
tr|J3QSF1|J3QSF1_HUMAN	FALSE	38687532	41710920	41435296	45489188	57643180	54340504	0
sp|P14324-2|FPPS_HUMAN;sp|P14324|FPPS_HUMAN	FALSE	25256644	25634030	23881360	25767130	28962486	26003864	0
tr|A0A2R8Y4A2|A0A2R8Y4A2_HUMAN	FALSE	57630100	66505012	63783492	84876976	97341576	78596816	0
sp|P00558|PGK1_HUMAN	FALSE	886844736	836488320	804324288	831865792	905844416	815992512	0
tr|B8ZZ51|B8ZZ51_HUMAN	FALSE	60362608	55564696	63464188	71313496	75834816	71732912	0
tr|M0R0P7|M0R0P7_HUMAN;tr|M0R1A7|M0R1A7_HUMAN;tr|M0R3D6|M0R3D6_HUMAN	FALSE	4.72013e+06	14174577	14136774	12952287	14333502	14322911	0
tr|A0A1W2PQD4|A0A1W2PQD4_HUMAN	FALSE	33631796	44117224	46378748	37124752	48764408	47867348	0
sp|P29401|TKT_HUMAN;sp|P29401-2|TKT_HUMAN	FALSE	670035264	583760576	569006976	673356352	617829888	618995520	0
tr|B8ZZ54|B8ZZ54_HUMAN	FALSE	52881568	40954680	44102732	44882144	51322100	44253644	0
tr|A0A1W2PPL4|A0A1W2PPL4_HUMAN;tr|A0A1W2PP34|A0A1W2PP34_HUMAN;tr|A0A1W2PQL0|A0A1W2PQL0_HUMAN;tr|A0A1W2PPH7|A0A1W2PPH7_HUMAN	FALSE	62439672	61812636	61884108	56318412	64967640	57252780	0
tr|H3BV41|H3BV41_HUMAN;tr|H3BND3|H3BND3_HUMAN;sp|O43809|CPSF5_HUMAN	FALSE	8.36423e+06	9209341	9403379	12173985	9299101	9760330	0
tr|K7EJP1|K7EJP1_HUMAN	FALSE	52510688	48160500	47251680	52919352	51328820	49821212	0
tr|J3QQT9|J3QQT9_HUMAN	FALSE	8151599	14772604	14206400	11569176	18393952	15891869	0
tr|Q3BDU5|Q3BDU5_HUMAN	FALSE	170429408	144440416	133044160	157586256	155897344	150625552	0
tr|J3KTN0|J3KTN0_HUMAN	FALSE	30596748	30011660	28934578	30681300	29978410	31676300	0.00191571
sp|P30040|ERP29_HUMAN;tr|F8VY02|F8VY02_HUMAN	FALSE	10487312	9172614	10036180	8678884	10862718	10294074	0
tr|M0R0Y6|M0R0Y6_HUMAN	FALSE	49123848	40046864	38945880	43462444	48651764	44559388	0
sp|Q92598-2|HS105_HUMAN;sp|Q92598-4|HS105_HUMAN;sp|Q92598-3|HS105_HUMAN;sp|Q92598|HS105_HUMAN	FALSE	10501762	8695599	7.96658e+06	8732686	11189119	10120906	0.00191571
sp|P60174|TPIS_HUMAN;sp|P60174-1|TPIS_HUMAN	FALSE	672097280	698366720	652710528	769532736	873903872	787238976	0
sp|P53396-3|ACLY_HUMAN	FALSE	55877516	58442628	49401052	53379108	57647732	61308672	0
sp|Q15286|RAB35_HUMAN;tr|F5H157|F5H157_HUMAN;sp|Q15286-2|RAB35_HUMAN	FALSE	44539164	40083532	37276308	37114236	41698216	40119548	0
tr|F6THM6|F6THM6_HUMAN	FALSE	5026328	17005106	15361460	13944381	18330952	19416562	0.00241546
tr|K7EJB9|K7EJB9_HUMAN	FALSE	349664768	314180160	309218592	322407104	311733472	276896320	0.00114025
tr|A0A087WTS8|A0A087WTS8_HUMAN;tr|A0A087WYC1|A0A087WYC1_HUMAN	FALSE	14004360	12146333	11824122	13577020	20744492	12087097	0.00114025
tr|F8VQQ8|F8VQQ8_HUMAN	FALSE	6.86384e+06	7522132	7466992	8268769	9599449	9630209	0
tr|M0QY96|M0QY96_HUMAN;tr|M0R2I7|M0R2I7_HUMAN	FALSE	13641293	24482326	20136240	26548614	28408076	28843930	0.00462606
sp|P09960|LKHA4_HUMAN;sp|P09960-4|LKHA4_HUMAN	FALSE	5.9066e+06	4.24542e+06	3.86344e+06	4.11469e+06	4.19408e+06	3.46326e+06	0
tr|A0A087WXQ8|A0A087WXQ8_HUMAN;tr|A0A087WUL2|A0A087WUL2_HUMAN;sp|P49720|PSB3_HUMAN;tr|A0A087WY10|A0A087WY10_HUMAN	FALSE	23624752	22161304	21779042	21118752	25061096	20233324	0
tr|E7ESK7|E7ESK7_HUMAN	FALSE	24125700	24070290	24319004	28913644	30577910	28136106	0
sp|P22102-2|PUR2_HUMAN	FALSE	27066960	23902666	22713542	24824422	28532520	26063232	0
tr|E7EX29|E7EX29_HUMAN	FALSE	13706670	16534135	16581164	16931558	15026150	17937152	0
tr|A0A087WWU8|A0A087WWU8_HUMAN	FALSE	37421412	34183340	36945392	36689960	34842144	37596396	0.00191571
sp|A5A3E0|POTEF_HUMAN	FALSE	453602752	413876192	435070144	523894720	519069248	486318944	0
sp|P14866|HNRPL_HUMAN;tr|M0QXS5|M0QXS5_HUMAN;sp|P14866-2|HNRPL_HUMAN;tr|A0A3B3ITJ4|A0A3B3ITJ4_HUMAN	FALSE	14005080	14654020	11965953	12230898	13605839	13327461	0
sp|P60953|CDC42_HUMAN	FALSE	18280598	23608230	21679860	20824538	29744162	25582258	0
sp|P35241-4|RADI_HUMAN	FALSE	40335624	35249180	36859236	40570400	36613020	37285480	0.00241546
tr|K7EQR9|K7EQR9_HUMAN	FALSE	14598510	12438099	11340078	14007877	14596454	14448419	0
tr|B7ZAR1|B7ZAR1_HUMAN;tr|E9PCA1|E9PCA1_HUMAN	FALSE	18706914	31553688	29319552	30372622	38042980	40898264	0
sp|P02545-2|LMNA_HUMAN;sp|P02545-6|LMNA_HUMAN	FALSE	94058968	91300912	90246464	82573192	87436784	83513112	0
sp|Q08J23|NSUN2_HUMAN;sp|Q08J23-2|NSUN2_HUMAN	FALSE	13422240	21109536	19019102	20662512	24235016	17319484	0
sp|P25789-2|PSA4_HUMAN	TRUE	11628186	12377870	10083221	9002869	12467262	11839562	0.00114025
sp|P26641-2|EF1G_HUMAN;sp|P26641|EF1G_HUMAN	FALSE	406398688	469178912	472440544	458704576	500041856	487561376	0
tr|A0A2R8Y6I8|A0A2R8Y6I8_HUMAN	FALSE	633605760	685861888	706513600	731732288	804534784	734993216	0
sp|Q9Y3F4|STRAP_HUMAN;sp|Q9Y3F4-2|STRAP_HUMAN	FALSE	42530124	45277372	39137576	32539888	44617784	50038660	0
tr|J3QR09|J3QR09_HUMAN;sp|P84098|RL19_HUMAN;tr|J3KTE4|J3KTE4_HUMAN	FALSE	10114971	11952216	8128357	19603002	16729956	19217298	0.00241546
sp|P55884-2|EIF3B_HUMAN;tr|C9JQN7|C9JQN7_HUMAN;sp|P55884|EIF3B_HUMAN	FALSE	4401967	6.61123e+06	6.83048e+06	5021503	7894671	7.16575e+06	0.00241546
tr|A0A2R8Y5S7|A0A2R8Y5S7_HUMAN;sp|P35241|RADI_HUMAN;sp|P35241-5|RADI_HUMAN;tr|A0A2R8Y7M3|A0A2R8Y7M3_HUMAN	FALSE	19587076	19408534	17456750	19120652	19751256	18365368	0
sp|P53999|TCP4_HUMAN	FALSE	13238285	12061320	10905874	12637391	11759589	12141866	0
tr|F8VZA3|F8VZA3_HUMAN;tr|F8VU16|F8VU16_HUMAN;tr|F8VWR1|F8VWR1_HUMAN	FALSE	48395780	40795816	39802836	36097724	39508684	36906604	0
sp|P23396|RS3_HUMAN	FALSE	19690616	22360070	24628584	25541198	23215512	29619188	0
sp|Q96FJ2|DYL2_HUMAN;sp|P63167|DYL1_HUMAN	FALSE	11413667	22118660	18829942	22386676	24331984	24563960	0.00462606
tr|E9PCW0|E9PCW0_HUMAN;tr|E7ESE2|E7ESE2_HUMAN;tr|C9JZ20|C9JZ20_HUMAN	FALSE	55983420	50027328	43195100	44031140	43410128	41067440	0
tr|C9JIS1|C9JIS1_HUMAN;tr|C9JZN1|C9JZN1_HUMAN;tr|E7EP32|E7EP32_HUMAN;sp|Q9HAV0|GBB4_HUMAN;tr|C9JXA5|C9JXA5_HUMAN;sp|P62879|GBB2_HUMAN	FALSE	14760636	18156068	18499552	16416924	21817518	21296642	0
tr|C9JDS9|C9JDS9_HUMAN	FALSE	167302576	344926400	321953760	321570368	367689792	342366624	0
tr|H0YN26|H0YN26_HUMAN;sp|P39687|AN32A_HUMAN	FALSE	12383700	16789704	17447878	25230450	24342806	39968096	0.00191571
sp|Q96AE4-2|FUBP1_HUMAN;sp|Q96AE4|FUBP1_HUMAN;tr|E9PEB5|E9PEB5_HUMAN	FALSE	39828444	33880256	32432600	35749864	35155472	34439800	0
sp|A0A0B4J2A2|PAL4C_HUMAN;sp|P0DN37|PAL4G_HUMAN	FALSE	169267568	171612048	154538320	174830128	101405840	4.55566e+06	0.00241546
sp|Q92979|NEP1_HUMAN;tr|A0A087WWQ2|A0A087WWQ2_HUMAN;tr|A0A087WVM7|A0A087WVM7_HUMAN;tr|V9GYP5|V9GYP5_HUMAN	FALSE	50188572	632767	53971448	2.10241e+06	57907608	8528281	0.00462606
tr|F8VQ14|F8VQ14_HUMAN	FALSE	83919512	68818456	69810736	77945608	78114032	57813832	0
tr|Q15244|Q15244_HUMAN	FALSE	30870080	29070684	26422614	35026172	41038504	43022816	0.00241546
sp|P55809|SCOT1_HUMAN;tr|E9PDW2|E9PDW2_HUMAN	FALSE	11943568	9751984	10302053	8700161	10341963	11334563	0
sp|Q3ZCM7|TBB8_HUMAN	FALSE	5188144	9618379	7.99384e+06	8.28992e+06	8443563	6.25569e+06	0.00241546
sp|Q86V81|THOC4_HUMAN;tr|E9PB61|E9PB61_HUMAN	FALSE	10607104	16349289	14642837	16565637	18256782	14018403	0.00241546
tr|C9JZW3|C9JZW3_HUMAN	FALSE	11592093	27406760	20091424	30661504	17434868	28853526	0
tr|J3KSZ0|J3KSZ0_HUMAN	FALSE	16663013	30707172	32001044	32099300	34326604	32474096	0.00191571
sp|P55072|TERA_HUMAN	FALSE	193431136	220320864	234886176	213748816	248994624	241888352	0
sp|P14174|MIF_HUMAN	FALSE	425046496	423928064	422447584	481877152	499646976	473559200	0.00191571
tr|E5RH24|E5RH24_HUMAN	FALSE	27384622	24414506	23442182	27409660	26552958	22324462	0
tr|B1AKQ8|B1AKQ8_HUMAN	FALSE	15285572	12098827	9783879	11390724	13504023	11103013	0
sp|P26447|S10A4_HUMAN	FALSE	257535904	251457360	248107392	252760224	286499360	270769120	0
tr|A0A087WVZ1|A0A087WVZ1_HUMAN;tr|A0A0J9YVQ7|A0A0J9YVQ7_HUMAN	FALSE	17417746	13054818	19403374	18854424	18011252	17061088	0.00241546
sp|P11142-2|HSP7C_HUMAN	FALSE	52335824	76868520	86962096	83107896	102933872	90654200	0
tr|H0YFC6|H0YFC6_HUMAN	FALSE	183924176	161257424	161812464	139388128	158391536	141152624	0
tr|H0Y9P0|H0Y9P0_HUMAN	FALSE	117555960	119144792	111090480	115544448	136448928	124522152	0
tr|A0A0J9YYC4|A0A0J9YYC4_HUMAN	FALSE	13706824	20289772	25445724	33068648	40610584	37038192	0
tr|J3QLI9|J3QLI9_HUMAN;sp|P62314|SMD1_HUMAN	FALSE	8515324	7402333	9942013	11778170	14414750	9988748	0.00241546
tr|D3YTI8|D3YTI8_HUMAN	FALSE	61388068	57387444	55465212	57323944	66680616	57907160	0
sp|P33993-3|MCM7_HUMAN;sp|P33993|MCM7_HUMAN	FALSE	3.60298e+06	8.06231e+06	8403632	7861028	8891177	9485119	0.00241546
tr|H3BU31|H3BU31_HUMAN	FALSE	24448380	60603084	58214812	60192040	67560160	64412396	0.00191571
sp|Q96HS1-2|PGAM5_HUMAN;sp|Q96HS1|PGAM5_HUMAN	FALSE	635388	2.2172e+06	2.25602e+06	2.13512e+06	2.84261e+06	2.06474e+06	0.00191571
tr|E9PN91|E9PN91_HUMAN	FALSE	42678672	35333664	31526620	28538892	34841724	30691248	0
tr|H7C0C1|H7C0C1_HUMAN	FALSE	47378692	39129320	33757812	39520968	44812336	38701076	0
tr|E9PQD7|E9PQD7_HUMAN	FALSE	62453716	76938360	66367152	81153744	86481952	79903552	0
tr|F8VXZ7|F8VXZ7_HUMAN;tr|F8W0F6|F8W0F6_HUMAN	FALSE	165386288	177901568	184270704	192169264	202974544	190420720	0
sp|P38646|GRP75_HUMAN	FALSE	186028992	196784224	192892320	206800544	213614416	222072064	0
sp|O00264|PGRC1_HUMAN	FALSE	9992729	6.49907e+06	9288248	8.17745e+06	6.09129e+06	7191479	0
sp|Q15185-2|TEBP_HUMAN	FALSE	40358748	42489352	28003606	38698556	38336524	42947016	0
tr|H3BNC9|H3BNC9_HUMAN;sp|P08708|RS17_HUMAN	FALSE	81750232	83908016	77774504	80875352	87507784	76693472	0
tr|G3V4U2|G3V4U2_HUMAN;tr|G3V3W7|G3V3W7_HUMAN;tr|G3V3J6|G3V3J6_HUMAN	FALSE	75444104	132735096	130288496	151820672	179735936	164266192	0
sp|P0DPK2|H3Y_HUMAN;tr|A0A2R8Y7G9|A0A2R8Y7G9_HUMAN;sp|P0DPK5|H3X_HUMAN	FALSE	87073072	80749056	83495864	90109448	96663672	94854888	0.00241546
tr|M0QYS1|M0QYS1_HUMAN;sp|P40429|RL13A_HUMAN	FALSE	105149952	118721008	110317984	108360816	130867888	123817352	0
tr|C9JL25|C9JL25_HUMAN	FALSE	76337976	70570088	77261888	99837056	91419560	87065384	0.00191571
tr|M0R1I1|M0R1I1_HUMAN	FALSE	264001600	293463008	348371840	435376064	460205824	410044384	0
sp|P61978-2|HNRPK_HUMAN;sp|P61978|HNRPK_HUMAN	FALSE	127614136	213396496	216314896	241778992	268495168	251658336	0
tr|D6RHJ3|D6RHJ3_HUMAN;tr|D6RD16|D6RD16_HUMAN	FALSE	14512009	39916256	19180734	14593075	11957312	15924142	0.00241546
sp|P39023|RL3_HUMAN	FALSE	30601840	40118552	38621024	36077696	42534404	35453464	0.00241546
sp|P40925|MDHC_HUMAN;sp|P40925-3|MDHC_HUMAN;sp|P40925-2|MDHC_HUMAN	FALSE	14249464	14832902	11099691	12040839	12772242	12536279	0.00241546
sp|P32119|PRDX2_HUMAN	FALSE	117235952	109932344	99955448	110188968	111994752	111719376	0
sp|P12235|ADT1_HUMAN	FALSE	35266532	36553860	32541196	32270238	31016860	40752912	0.00191571
sp|P20700|LMNB1_HUMAN;tr|E9PBF6|E9PBF6_HUMAN	FALSE	8650086	8.2062e+06	8486646	9018244	10042697	10200777	0
sp|Q9Y277|VDAC3_HUMAN;sp|Q9Y277-2|VDAC3_HUMAN	FALSE	6148691	4.94915e+06	4976887	4777273	5.96012e+06	5.48558e+06	0
tr|K7ERK8|K7ERK8_HUMAN;tr|A0A0J9YXM3|A0A0J9YXM3_HUMAN;tr|A0A0J9YXH9|A0A0J9YXH9_HUMAN;tr|K7EIL4|K7EIL4_HUMAN	FALSE	74305816	69218304	69442368	71346000	68428408	45563704	0
tr|E5RK69|E5RK69_HUMAN	FALSE	9675053	13950568	15440675	15946868	17173392	19986596	0.00191571
sp|Q9BVA1|TBB2B_HUMAN;sp|Q13885|TBB2A_HUMAN	FALSE	11880264	13643198	10477747	67792896	57899324	51468896	0
tr|D6RIT2|D6RIT2_HUMAN	FALSE	11472547	14787129	17461028	19765380	20884024	19421518	0.00191571
tr|H3BNC1|H3BNC1_HUMAN	FALSE	45191944	38520024	40959284	43430144	43589052	39699612	0
sp|Q13283|G3BP1_HUMAN	FALSE	404309472	354794976	370586240	400033760	435377792	313592000	0
tr|A0A087WU68|A0A087WU68_HUMAN	FALSE	4.6429e+06	7266106	4625843	13138120	14879085	13276627	0.00191571
sp|P57053|H2BFS_HUMAN	FALSE	1252652800	1251401600	1180840448	1272936960	1377447936	1311761280	0
tr|E5RHP0|E5RHP0_HUMAN	FALSE	162421344	164614960	170126336	201290384	209035648	196054032	0
tr|H3BR70|H3BR70_HUMAN	FALSE	220709408	191063200	220693760	213909840	251223296	222889056	0
sp|Q9UII2|ATIF1_HUMAN	FALSE	10600320	11788844	11867387	9626859	12527388	11114433	0
sp|P62913|RL11_HUMAN;tr|Q5VVC8|Q5VVC8_HUMAN;sp|P62913-2|RL11_HUMAN	FALSE	136016096	141442128	133809688	153525408	144209952	136578832	0
tr|G3V2J8|G3V2J8_HUMAN	FALSE	27572484	27550652	30390998	26719098	36843628	42257800	0
sp|P31040-2|SDHA_HUMAN;sp|P31040|SDHA_HUMAN	FALSE	4894658	3.33519e+06	3.66654e+06	6231950	5793797	5090334	0.00191571
sp|O95626|AN32D_HUMAN;sp|O43423|AN32C_HUMAN	FALSE	25291676	23637286	17593274	21190726	21463464	21785166	0
tr|V9GZ54|V9GZ54_HUMAN	FALSE	27314142	26888052	24933312	29125852	30185660	25560490	0
tr|F8VR69|F8VR69_HUMAN	FALSE	23023336	30308212	31313988	30416928	35387144	34486840	0.00191571
tr|C9JIJ5|C9JIJ5_HUMAN	FALSE	32945782	29449044	25541902	30241482	32011064	29517002	0.00241546
tr|F8WCH0|F8WCH0_HUMAN	FALSE	1028310272	913957504	941857024	1081509888	1064218880	1006100480	0
sp|P07737|PROF1_HUMAN	FALSE	216144112	252298816	242776144	265083504	279059840	276368576	0
sp|P61081|UBC12_HUMAN;tr|M0QYI6|M0QYI6_HUMAN	FALSE	22029846	22131174	22294412	17916646	17360650	17611144	0
sp|P23246-2|SFPQ_HUMAN	FALSE	66904280	83271912	84438672	94791232	93438856	113284304	0
sp|P62888|RL30_HUMAN;tr|E5RI99|E5RI99_HUMAN	FALSE	42160300	40352804	49133896	56335428	63649856	56864504	0
sp|P63241|IF5A1_HUMAN;tr|I3L504|I3L504_HUMAN;sp|P63241-2|IF5A1_HUMAN;tr|I3L397|I3L397_HUMAN	FALSE	37044368	30495100	34925140	35704416	33513234	33961316	0
tr|B5MEG9|B5MEG9_HUMAN	FALSE	6011654	5.95222e+06	6.25761e+06	2.96141e+06	3.03025e+06	2.81978e+06	0.00462606
tr|D6RBK0|D6RBK0_HUMAN	FALSE	25132814	27893888	24373138	23506394	23220136	22265694	0
tr|F5H1U3|F5H1U3_HUMAN	FALSE	74623256	117575560	119273640	123744104	142319168	139829184	0
tr|J3KSW7|J3KSW7_HUMAN;tr|J3QQV5|J3QQV5_HUMAN	FALSE	16683753	17761446	15866185	15869055	22185698	17748886	0
sp|P25398|RS12_HUMAN	FALSE	213624320	266648656	254581728	255165568	282797664	279201248	0
sp|O95817|BAG3_HUMAN	FALSE	4560869	4078465	4330989	4445293	4.78814e+06	3.21466e+06	0.00241546
tr|H0YFG2|H0YFG2_HUMAN	FALSE	24800486	24036980	23764416	39799428	36845960	22064034	0
sp|P0CG39|POTEJ_HUMAN	FALSE	89326128	244452432	211102224	238191936	294575712	263497200	0
sp|P50995-2|ANX11_HUMAN;sp|P50995|ANX11_HUMAN	FALSE	7581876	5574329	5.64498e+06	5.13977e+06	5.95635e+06	6234067	0
tr|A0A075B716|A0A075B716_HUMAN;tr|H0YN88|H0YN88_HUMAN	FALSE	10511948	21481912	21944626	21982306	22416822	21866380	0
sp|P62241|RS8_HUMAN	FALSE	94748728	134181912	104324464	197900432	177007952	185433728	0
sp|P32320|CDD_HUMAN	FALSE	68474216	101927920	95976720	89805576	97482936	84700400	0.00241546
tr|H0YAM7|H0YAM7_HUMAN	FALSE	38085092	41482988	38058024	45387016	49519308	45949600	0
sp|P07954|FUMH_HUMAN;sp|P07954-2|FUMH_HUMAN	FALSE	60656016	64426784	63829144	60485200	68558576	69605440	0
sp|P20290|BTF3_HUMAN;tr|H0Y9Y1|H0Y9Y1_HUMAN	FALSE	25067340	30066956	32559078	28519342	36475508	33922900	0
sp|P61313|RL15_HUMAN	FALSE	22041196	52101800	50122980	42972836	54969916	59015968	0
sp|P42766|RL35_HUMAN	FALSE	28123258	25219880	25677616	26303282	28742492	27069772	0
tr|B8ZZL8|B8ZZL8_HUMAN	FALSE	49652456	44203048	43205512	44666724	44438396	42858472	0.00241546
sp|Q9Y230|RUVB2_HUMAN;sp|Q9Y230-2|RUVB2_HUMAN	FALSE	22343440	18067280	19105314	20183030	21221444	22445732	0.00191571
sp|Q9Y2W2|WBP11_HUMAN	FALSE	1.82422e+06	3.43029e+06	2473731	3.45097e+06	3.62693e+06	3.31516e+06	0.00191571
sp|P38159|RBMX_HUMAN	FALSE	7438959	7541704	6724220	6.97296e+06	6.90903e+06	7161521	0
sp|Q13509|TBB3_HUMAN	FALSE	18689496	21100608	19957606	24871294	23446608	21758806	0
sp|P10606|COX5B_HUMAN	FALSE	13053688	10963055	13187527	12952006	13395490	14902999	0
tr|F5GWF6|F5GWF6_HUMAN	FALSE	19509210	17222760	17888942	21707068	23094838	20362712	0
sp|A6NNZ2|TBB8L_HUMAN	FALSE	15933422	30764112	36806980	21812082	29298854	36280980	0
tr|G3V3R4|G3V3R4_HUMAN;tr|G3V2R8|G3V2R8_HUMAN;tr|G3V5W4|G3V5W4_HUMAN;tr|G3V2N6|G3V2N6_HUMAN	FALSE	13945454	15526082	14923985	14002400	16569675	17576486	0
sp|P07237|PDIA1_HUMAN	FALSE	45102536	52294656	47032656	56856824	66344052	58769988	0
sp|P80723|BASP1_HUMAN	FALSE	79424640	71166104	63831284	64834940	75900040	69616888	0
tr|F8WE04|F8WE04_HUMAN	FALSE	234289440	207721040	187369440	228804592	237790400	221838688	0
sp|P35609-2|ACTN2_HUMAN;sp|P35609|ACTN2_HUMAN	FALSE	14001275	15098423	16514377	14617963	18739928	15997063	0
tr|Q5JNZ6|Q5JNZ6_HUMAN	FALSE	18443614	46497432	54402436	41147020	57877320	51960072	0.00241546
tr|E5RIP1|E5RIP1_HUMAN	FALSE	1.58032e+06	16173961	17390850	14444281	17220922	17660120	0
tr|J3KR24|J3KR24_HUMAN	FALSE	22541322	21777920	21316450	22596522	20664068	20673138	0.00241546
tr|E9PI65|E9PI65_HUMAN	FALSE	491965952	450948416	435652224	474347232	495095840	460795232	0
tr|H0YNA0|H0YNA0_HUMAN	FALSE	21327568	20375560	20305912	20443328	19561466	17530630	0
sp|Q9NR30|DDX21_HUMAN;sp|Q9NR30-2|DDX21_HUMAN	FALSE	13534039	13817570	12036968	13795673	15542081	12658559	0
tr|A0A087WVQ9|A0A087WVQ9_HUMAN;sp|P68104-2|EF1A1_HUMAN	FALSE	4241387520	3600373504	3579136256	3647731456	3974676736	3797324800	0
tr|A0A0B4J1R6|A0A0B4J1R6_HUMAN	FALSE	433868544	428816992	422315936	482836224	552564544	505840544	0
tr|B0YJC4|B0YJC4_HUMAN	FALSE	414415680	382197056	356168800	404488928	417990464	382971872	0
sp|Q92688-2|AN32B_HUMAN;sp|Q92688|AN32B_HUMAN	FALSE	38138816	35009252	28896858	34622604	35116896	34283604	0
sp|Q96A08|H2B1A_HUMAN	FALSE	60744940	67697168	72280808	64153812	71271896	64738636	0
sp|P68371|TBB4B_HUMAN	FALSE	43515020	50677656	40871476	58980292	65242968	58067312	0
tr|M0QZC5|M0QZC5_HUMAN	FALSE	144659280	123976064	118770536	120600336	131050536	128110112	0
sp|P62269|RS18_HUMAN	FALSE	101885936	106812952	101814648	104814440	106246272	97407576	0
sp|O00483|NDUA4_HUMAN	FALSE	67983792	54211688	33772128	35906864	40224980	32711320	0
sp|P62701|RS4X_HUMAN	FALSE	225197312	214001664	203465216	214508752	225923824	210621856	0
sp|Q15785|TOM34_HUMAN	FALSE	3623322	4.35804e+06	4325798	4.92058e+06	4.64388e+06	4.64847e+06	0
XXX_tr|A0A140TA25|A0A140TA25_HUMAN	TRUE	22459620	16350080	18070126	21290902	20806450	0	0.00759878
tr|B9ZVP7|B9ZVP7_HUMAN	FALSE	58860644	60351360	60351036	73007368	69368688	72543008	0
tr|J3QR48|J3QR48_HUMAN	FALSE	63316440	61374648	52273404	55766920	57897920	52756748	0
tr|F8W1K8|F8W1K8_HUMAN	FALSE	61236752	56548160	48258100	55181564	59077188	53924616	0.00241546
tr|E9PLD0|E9PLD0_HUMAN	FALSE	34329992	28660048	25092598	29381394	29969574	31720328	0
sp|P52815|RM12_HUMAN;tr|B4DLN1|B4DLN1_HUMAN	FALSE	10253792	7.8029e+06	9655192	6757758	11897569	11773427	0.00611154
sp|Q14137-2|BOP1_HUMAN;sp|Q14137|BOP1_HUMAN	FALSE	2001455	718414	33060542	478750	253965	34946988	0.00191571
tr|A0A1B0GVG8|A0A1B0GVG8_HUMAN	FALSE	96368528	124819032	115519832	140867360	146891936	136121136	0
sp|P35613-4|BASI_HUMAN;sp|P35613-3|BASI_HUMAN;tr|A0A087WUV8|A0A087WUV8_HUMAN	FALSE	3.92959e+06	7.98527e+06	9088511	8895930	10378766	12743121	0.00191571
tr|D6RFM5|D6RFM5_HUMAN	FALSE	27681748	24018990	22978124	25124730	24068438	19736290	0
sp|Q08J23-3|NSUN2_HUMAN	FALSE	26704616	22149242	22983834	26553512	23656638	24231644	0.00191571
sp|Q86VP6|CAND1_HUMAN	FALSE	11487165	9808191	11063610	11832932	11681846	10390697	0
tr|C9J3N8|C9J3N8_HUMAN	FALSE	94248840	94473840	93498624	107041872	103413424	99378112	0.00191571
sp|P26373-2|RL13_HUMAN	FALSE	37836312	32053370	37998508	34364040	35935004	30402370	0.00191571
tr|G3V2A3|G3V2A3_HUMAN	FALSE	46941484	78817648	90751096	83030200	95007184	86704056	0
sp|P16152|CBR1_HUMAN	FALSE	26535186	18117318	18824584	24107430	24643312	21133220	0
tr|D6REE5|D6REE5_HUMAN	FALSE	15468384	14520698	16537666	21896202	23557056	22779488	0
tr|J3KSS0|J3KSS0_HUMAN	FALSE	18589266	46276008	48636944	42628832	55025552	49748148	0.00191571
sp|Q12874|SF3A3_HUMAN	FALSE	3.71241e+06	3.21748e+06	3.16325e+06	3454764	3.98166e+06	5.07031e+06	0
sp|Q99798|ACON_HUMAN;tr|A2A274|A2A274_HUMAN	FALSE	8554343	12773239	17363848	18614960	18488846	21215274	0.00241546
sp|P07814|SYEP_HUMAN	FALSE	74418400	161802848	202939680	216918416	189913584	213304496	0
tr|D6RFX4|D6RFX4_HUMAN	FALSE	213193472	214057792	195938192	221448816	220176640	205521728	0
sp|P39656-3|OST48_HUMAN;sp|P39656|OST48_HUMAN;tr|A0A0C4DGS1|A0A0C4DGS1_HUMAN;tr|U3KQ84|U3KQ84_HUMAN	FALSE	3.46227e+06	3.83135e+06	3.13153e+06	2.75944e+06	3.61443e+06	2.83336e+06	0.00241546
tr|E7ESH4|E7ESH4_HUMAN	FALSE	6.37495e+06	5953705	7543102	7082494	7.58281e+06	6235436	0
tr|H7C3M2|H7C3M2_HUMAN	FALSE	9402950	16230668	16950792	12435710	16664325	16120026	0.00191571
tr|K7ERW9|K7ERW9_HUMAN	FALSE	4.20949e+06	2.59227e+06	6.84418e+06	6493385	6784477	3.3571e+06	0.00759878
tr|A0A1W2PPE9|A0A1W2PPE9_HUMAN	FALSE	187733712	188112112	217508576	197995536	219394112	237695152	0.00241546
tr|J3KS13|J3KS13_HUMAN	FALSE	12073694	22321684	18469994	40336240	43185292	40213020	0
sp|P45880-1|VDAC2_HUMAN;tr|A0A0A0MR02|A0A0A0MR02_HUMAN;sp|P45880|VDAC2_HUMAN;sp|P45880-2|VDAC2_HUMAN	FALSE	183865072	182122880	172023248	190387888	202395760	197077664	0
tr|H3BM89|H3BM89_HUMAN	FALSE	300771552	185910144	180341040	185234464	191486000	189379712	0
sp|Q96P70|IPO9_HUMAN	FALSE	4209405	5.64653e+06	5.60326e+06	6138160	4517601	4.68816e+06	0
sp|P13639|EF2_HUMAN	FALSE	1698028160	1766294784	1646417920	1782288256	1914692608	1833753600	0
tr|X6RJP6|X6RJP6_HUMAN	FALSE	91762352	86110176	83474264	112409576	120353952	112303608	0
sp|P14868-2|SYDC_HUMAN;sp|P14868|SYDC_HUMAN	FALSE	5361903	5.03393e+06	7.05603e+06	7.56431e+06	6.64297e+06	5.8979e+06	0.00241546
tr|H0Y400|H0Y400_HUMAN	FALSE	41030012	34599068	37301568	37371648	39696772	36497004	0
tr|F8W646|F8W646_HUMAN	FALSE	142356176	139681248	135727264	141456896	148730928	137115952	0
sp|P07205|PGK2_HUMAN	FALSE	15718724	66711792	49554280	96585344	109753856	110537112	0.00191571
tr|F2Z3C0|F2Z3C0_HUMAN;tr|A8MXK4|A8MXK4_HUMAN	FALSE	44368760	34056016	35977600	35548740	32534996	35339788	0.00241546
sp|P35579|MYH9_HUMAN	FALSE	20616446	20504566	18199368	15379984	25314720	21469174	0.00191571
tr|A0A1B0GTT5|A0A1B0GTT5_HUMAN	FALSE	137614496	134265696	136609120	164117920	172805696	170560512	0
sp|P35637|FUS_HUMAN;sp|P35637-2|FUS_HUMAN;tr|H3BPE7|H3BPE7_HUMAN	FALSE	79469192	80904672	81541352	84738448	85627640	81094672	0
tr|M0R0K9|M0R0K9_HUMAN	FALSE	22883160	18177000	19017162	25057920	18645790	21808440	0.00191571
sp|Q9Y265-2|RUVB1_HUMAN;sp|Q9Y265|RUVB1_HUMAN	FALSE	18775114	16947576	14182720	15608132	16674504	13009478	0
tr|E7EWJ3|E7EWJ3_HUMAN	FALSE	14087471	21762026	20545524	19573684	23768456	20349526	0
tr|M0QY67|M0QY67_HUMAN	FALSE	12482332	11241061	10434662	12102464	13006044	13699638	0
tr|F8VUX1|F8VUX1_HUMAN;sp|P55209-3|NP1L1_HUMAN;tr|F8VXI6|F8VXI6_HUMAN	FALSE	20126058	26843140	25629360	26261478	29429496	25593322	0.00191571
tr|K7EQ48|K7EQ48_HUMAN	FALSE	5986749	11690367	12556545	11404522	13299309	10168508	0
tr|H7BZJ3|H7BZJ3_HUMAN	FALSE	16365924	92061256	19013368	106240672	16926838	97198000	0.00462606
tr|H7C2U0|H7C2U0_HUMAN	FALSE	28032780	24326168	24740318	30768820	31646772	32992996	0.00191571
tr|A8MUD9|A8MUD9_HUMAN	FALSE	109661376	129228376	117150688	142402960	146542304	164949504	0
tr|H0Y8R5|H0Y8R5_HUMAN	FALSE	19558578	34801144	21512514	33113524	39471380	29916090	0.00462606
sp|P21796|VDAC1_HUMAN	FALSE	135586544	132743328	140845344	154873776	175732224	157111456	0
tr|E9PJD9|E9PJD9_HUMAN	FALSE	47209924	70182064	33605892	89112384	51403736	91623128	0
tr|A0A087WVN4|A0A087WVN4_HUMAN;tr|A0A087X1D8|A0A087X1D8_HUMAN	FALSE	9784791	17915742	12704433	27792522	28461556	26857446	0.00241546
sp|P07437|TBB5_HUMAN	FALSE	212001264	419546016	424670880	418176992	486508704	488644384	0
sp|P30050-2|RL12_HUMAN	FALSE	40582072	51900828	48505040	48194920	58195376	50973376	0
sp|P51858-3|HDGF_HUMAN;sp|P51858-2|HDGF_HUMAN;sp|P51858|HDGF_HUMAN	FALSE	26172324	26460592	26781058	24786394	31975622	24689238	0
tr|H0YJG0|H0YJG0_HUMAN	FALSE	29641622	31629842	32658624	47271568	53842440	49207108	0
tr|B4DUR8|B4DUR8_HUMAN;sp|P49368|TCPG_HUMAN	FALSE	82662408	115428344	117970272	126758968	130476984	122535448	0
sp|P61970|NTF2_HUMAN;tr|H3BRV9|H3BRV9_HUMAN	FALSE	26308636	16908830	9600672	10893993	10134506	10920426	0.00241546
tr|A0A0B4J213|A0A0B4J213_HUMAN	FALSE	2.9112e+06	27621444	21010544	40063012	57844612	50514604	0.00241546
tr|M0R0F0|M0R0F0_HUMAN;sp|P46782|RS5_HUMAN	FALSE	37736280	58745356	52693872	79788816	99811560	120672472	0.00241546
sp|Q99729|ROAA_HUMAN;sp|Q99729-4|ROAA_HUMAN	FALSE	3832503	3.28208e+06	3463926	3.49054e+06	3498049	3.4989e+06	0.00191571
sp|Q8N0Y7|PGAM4_HUMAN	FALSE	110467312	103899488	96068512	100642584	107602664	110825280	0
sp|P02545-5|LMNA_HUMAN;sp|P02545-4|LMNA_HUMAN	FALSE	13595768	13550781	16844782	24095676	24780350	22090970	0
tr|F5GZ03|F5GZ03_HUMAN	FALSE	16607138	18854556	16017461	18320420	16085071	17823430	0
sp|P31327-3|CPSM_HUMAN;sp|P31327|CPSM_HUMAN	FALSE	463308064	419345536	401314336	434015648	423400736	385907808	0
sp|P18085|ARF4_HUMAN;tr|C9JPM4|C9JPM4_HUMAN	FALSE	25819986	20598098	21025660	22782472	23909762	22355052	0
sp|P05386|RLA1_HUMAN	FALSE	105336288	92611432	81871208	91099232	83071040	82446664	0
sp|P25705-2|ATPA_HUMAN;sp|P25705|ATPA_HUMAN	FALSE	100960512	116771456	119747216	141632288	146977104	141834320	0
sp|Q7KZF4|SND1_HUMAN	FALSE	12854915	10402233	9830457	15101449	16452146	12485152	0
sp|Q58FF8|H90B2_HUMAN	FALSE	882422016	822569024	775196864	787068032	878235072	825041920	0
sp|P20618|PSB1_HUMAN	FALSE	5575078	8969224	10721702	9405062	10185824	8422839	0
sp|P27348|1433T_HUMAN	FALSE	24317436	21427004	21643872	21776516	23577890	20757594	0
tr|C9J1Z8|C9J1Z8_HUMAN;sp|P84085|ARF5_HUMAN	FALSE	0	4836755	4813621	6.37713e+06	8525480	8.27212e+06	0.00684932
sp|Q9BTM1-2|H2AJ_HUMAN	FALSE	88383088	90960240	100067640	109584120	122929152	110113920	0
tr|Q5T8U3|Q5T8U3_HUMAN	FALSE	90312696	71563824	68461224	77901824	73176128	62958216	0
tr|A0A075B6E2|A0A075B6E2_HUMAN	FALSE	31690766	27274048	23840284	24127996	29629622	25789652	0
tr|F6XY72|F6XY72_HUMAN	FALSE	53602736	48476636	47486564	50103124	55970268	50793852	0
sp|P78371-2|TCPB_HUMAN;sp|P78371|TCPB_HUMAN	FALSE	59668408	107681352	96831448	96746064	104525816	110049976	0
sp|O43252|PAPS1_HUMAN	FALSE	452297	1.93766e+06	1.66393e+06	1.6488e+06	2236750	2.37783e+06	0.00241546
sp|P49703|ARL4D_HUMAN	FALSE	0	4836755	4813621	6.37713e+06	8525480	8.27212e+06	0.00684932
sp|Q9H082|RB33B_HUMAN	FALSE	16937184	16452652	17343508	14285527	17307826	14706770	0
sp|Q15365|PCBP1_HUMAN	FALSE	138671824	134858848	123724568	147722704	168237968	151923424	0
sp|P09429|HMGB1_HUMAN	FALSE	43972076	51249336	51845660	48330324	60471608	53221016	0
sp|O14556|G3PT_HUMAN	FALSE	775932608	618854400	644104320	680912064	697261760	660008640	0
sp|P15880|RS2_HUMAN	FALSE	83723688	85364552	69607032	80101744	77141112	79212568	0
tr|A0A024R4M0|A0A024R4M0_HUMAN;sp|P46781|RS9_HUMAN	FALSE	53824992	54435372	54695892	66251204	65521556	58762496	0
tr|F8VRZ4|F8VRZ4_HUMAN;tr|F8VS66|F8VS66_HUMAN	FALSE	833212096	757560512	735286272	765628288	797901120	767309248	0
sp|O00299|CLIC1_HUMAN	FALSE	112444936	100697712	102802600	117106224	126133640	123339504	0
sp|P12236|ADT3_HUMAN	FALSE	344735232	393353408	361453216	406257984	397144864	373123680	0
tr|F8VZ49|F8VZ49_HUMAN	FALSE	92901800	127631952	131540608	123235560	135964064	133347800	0
tr|S4R3N1|S4R3N1_HUMAN	FALSE	34769240	30662454	26212186	36503248	29456176	30183860	0
sp|P13987|CD59_HUMAN;tr|E9PNW4|E9PNW4_HUMAN;tr|A0A2U3TZL5|A0A2U3TZL5_HUMAN;sp|P13987-2|CD59_HUMAN	FALSE	13401495	15325924	13849559	16472773	18348846	17973400	0
tr|A0A2R8Y660|A0A2R8Y660_HUMAN	FALSE	156048928	246979584	244592880	233430800	288106784	259932320	0
tr|H0YMI6|H0YMI6_HUMAN	FALSE	3509343	3436486	5.45013e+06	16225010	17075862	17368156	0
tr|H0Y5F5|H0Y5F5_HUMAN	FALSE	3.59004e+06	3.8131e+06	4718056	4419637	5.80534e+06	4348751	0
tr|M0QY85|M0QY85_HUMAN	FALSE	23422718	34781456	35109524	43773804	46466832	42068832	0.00241546
sp|P63104|1433Z_HUMAN	FALSE	130498864	113933480	110468904	132989256	134141640	124835528	0
sp|P06576|ATPB_HUMAN	FALSE	195745248	232358336	242733104	213826400	238289232	247287664	0
sp|P11021|BIP_HUMAN	FALSE	442779712	472389856	491373280	471595776	514254784	532711136	0
tr|F5GXY2|F5GXY2_HUMAN;tr|F5GYU2|F5GYU2_HUMAN	FALSE	149519648	138424224	134711744	139005248	154830272	155357792	0
sp|P22626-2|ROA2_HUMAN	FALSE	57988888	54995632	54143484	91057896	95296304	80498360	0
sp|P60709|ACTB_HUMAN;sp|P63261|ACTG_HUMAN	FALSE	38438828	74518880	81972360	102307568	100477800	76508328	0
sp|P36578|RL4_HUMAN	FALSE	201994512	228710960	250853824	263598000	204483248	189310544	0
sp|P48741|HSP77_HUMAN	FALSE	322991008	429090944	394662720	478081664	484514400	471782336	0.00191571
tr|K7EKJ9|K7EKJ9_HUMAN	FALSE	23728704	22388616	22578658	18242206	24042098	25233162	0.00241546
tr|E9PPT0|E9PPT0_HUMAN	FALSE	82981488	68972008	71747712	72822280	80366960	69303816	0
tr|M0QYG1|M0QYG1_HUMAN;tr|M0R0C6|M0R0C6_HUMAN	FALSE	7672431	8.01328e+06	5837161	2.13782e+06	2275496	8135688	0
sp|P31327-2|CPSM_HUMAN	FALSE	184267280	266149984	251335888	296886784	311809184	300676384	0
sp|P63267-2|ACTH_HUMAN	FALSE	24419432	26070186	24885380	25693090	23708396	24080130	0.00241546
sp|Q969H8|MYDGF_HUMAN	FALSE	15472703	16649231	20566178	19762346	22508958	19472924	0
tr|H0Y3Z3|H0Y3Z3_HUMAN	FALSE	77537816	67402360	64010500	62886460	70789296	55058172	0
sp|Q15029-2|U5S1_HUMAN;sp|Q15029-3|U5S1_HUMAN;sp|Q15029|U5S1_HUMAN	FALSE	81620560	70279800	75573944	72918728	75866872	68907160	0.00191571
tr|K7EK45|K7EK45_HUMAN	FALSE	32431986	32368446	33495372	42914000	41400256	40138428	0.00241546
sp|P50990-2|TCPQ_HUMAN	FALSE	29547084	27301304	27095582	26255328	30282080	28913468	0
tr|F2Z2G2|F2Z2G2_HUMAN	FALSE	14462243	34205604	27778086	41419420	29762588	38987688	0
sp|P78527-2|PRKDC_HUMAN;sp|P78527|PRKDC_HUMAN	FALSE	29575272	37749452	33532324	39954148	39954236	43558668	0
sp|P07741|APT_HUMAN;tr|H3BQZ9|H3BQZ9_HUMAN	FALSE	16955908	22712400	15773006	16257490	17656856	15265175	0
sp|Q09666|AHNK_HUMAN	FALSE	94432216	98363240	94019864	101312424	116985920	107018936	0
tr|E9PQX2|E9PQX2_HUMAN	FALSE	34721536	34020500	35456184	33728168	22757576	19477452	0
tr|F2Z2S8|F2Z2S8_HUMAN;tr|H0YCJ7|H0YCJ7_HUMAN	FALSE	36711224	29903154	31901330	38213900	36179836	35412584	0.00241546
sp|P19338|NUCL_HUMAN	FALSE	601024832	586065472	561339072	626812416	667354368	625755520	0
sp|P60174-4|TPIS_HUMAN	FALSE	603686272	550363968	522509152	534085440	591022912	555707200	0
sp|P61247|RS3A_HUMAN	FALSE	75348544	65426688	64948012	59998728	66033344	65155624	0
sp|P18669|PGAM1_HUMAN	FALSE	109265776	160524720	165632032	158617456	188982240	176920064	0
sp|Q99832-2|TCPH_HUMAN	FALSE	70795176	59664608	71844680	67994264	78211808	66894632	0.00241546
sp|P62266|RS23_HUMAN	FALSE	45499076	40239576	42163060	44400660	48780564	43733520	0
tr|K7EM90|K7EM90_HUMAN	FALSE	494576064	851858816	781092224	832025728	1033511168	962336256	0
tr|H0YLE2|H0YLE2_HUMAN	FALSE	11766568	12606202	10218272	13948837	11672224	13430398	0
tr|E9PN89|E9PN89_HUMAN	FALSE	223061200	202464432	204782064	219920352	238689216	214125184	0
tr|F8W888|F8W888_HUMAN	FALSE	131314064	114292584	104511440	144097568	89052896	117299432	0.00191571
tr|H3BTN5|H3BTN5_HUMAN	FALSE	81232512	105496760	107826200	107473560	114085864	103316136	0
sp|O43707|ACTN4_HUMAN	FALSE	82700008	79436744	75281928	76627008	79509648	65864568	0
tr|M0QYV5|M0QYV5_HUMAN;sp|Q16740|CLPP_HUMAN	FALSE	4.70801e+06	22127160	26717798	30478214	36078140	33757236	0.00241546
tr|E7EN40|E7EN40_HUMAN	FALSE	84549440	67940336	62950752	65400016	71329896	65082840	0
tr|H0YBG7|H0YBG7_HUMAN;tr|H0YBD7|H0YBD7_HUMAN	FALSE	22794666	47073988	39491820	71030944	73800200	74517048	0
tr|D6RDI0|D6RDI0_HUMAN	FALSE	21349418	31859968	50068112	47451248	29923824	61802320	0.00191571
tr|H3BTP7|H3BTP7_HUMAN	FALSE	40423336	49305296	44375328	60820044	139498576	125458296	0.00241546
tr|Q5SQT6|Q5SQT6_HUMAN	FALSE	25818724	23904334	21782674	37129892	35121132	39066728	0.00191571
sp|P49327|FAS_HUMAN	FALSE	341990624	612776640	668585408	640916544	747364288	783975168	0
tr|M0R2D3|M0R2D3_HUMAN	FALSE	201716640	354293344	339043392	416223840	473213216	377443904	0.00191571
tr|E5RIT6|E5RIT6_HUMAN;sp|Q9UNX3|RL26L_HUMAN	FALSE	12126602	10707940	10503246	12184135	10317517	11476174	0.00241546
sp|P22090|RS4Y1_HUMAN;tr|C9JEH7|C9JEH7_HUMAN	FALSE	53067380	123240896	116293528	108918176	131279232	123856104	0
tr|F8WF65|F8WF65_HUMAN	FALSE	14255860	14069992	17397460	22121780	23867094	22004632	0
tr|Q5JSD2|Q5JSD2_HUMAN;tr|Q5JSD1|Q5JSD1_HUMAN	FALSE	25296932	30905348	12702762	7.61309e+06	9966586	7.29151e+06	0
sp|P60900-2|PSA6_HUMAN	FALSE	18802712	16984712	15354104	17089430	20076806	15926393	0
sp|P06748-3|NPM_HUMAN	FALSE	19843508	19429790	22660452	15182324	20562344	24102554	0.00462606
sp|P62917|RL8_HUMAN	FALSE	4.3241e+06	4.44358e+06	4343639	5.16669e+06	5.61728e+06	5272698	0.00241546
sp|P39019|RS19_HUMAN	FALSE	80375392	72185856	62846072	68930320	75144688	76095792	0
sp|Q8NC51|PAIRB_HUMAN	FALSE	13468988	26969158	25604518	20413378	32730190	27872794	0
sp|Q01082|SPTB2_HUMAN;tr|A0A087WUZ3|A0A087WUZ3_HUMAN	FALSE	6515127	6.51682e+06	7241965	6.7055e+06	8053958	6.87268e+06	0.00241546
sp|Q08211|DHX9_HUMAN	FALSE	64376916	67036028	76280616	82843248	82822928	75515880	0
tr|A0A286YF78|A0A286YF78_HUMAN	FALSE	83459048	157305008	157260160	157022032	171284560	150222896	0
tr|K7EP01|K7EP01_HUMAN	FALSE	398844896	403927488	394969440	420955008	441321792	414892352	0
sp|P24752|THIL_HUMAN	FALSE	9647494	15221171	15739862	13941887	18583650	16802016	0
sp|Q96AG4|LRC59_HUMAN	FALSE	26784716	33397948	29219228	34540616	45240088	32455690	0
sp|P07900-2|HS90A_HUMAN;sp|P07900|HS90A_HUMAN	FALSE	988073856	1078129152	1086707968	1295535232	1385001728	1346030848	0
sp|O15523-2|DDX3Y_HUMAN;sp|O15523|DDX3Y_HUMAN	FALSE	13317160	10118538	9163730	9644750	9562838	7.87071e+06	0
tr|E7EQG2|E7EQG2_HUMAN;sp|Q14240-2|IF4A2_HUMAN;sp|Q14240|IF4A2_HUMAN	FALSE	95671448	78600776	83969872	90312616	89892288	87268360	0
tr|V9GZ37|V9GZ37_HUMAN	FALSE	97056296	173679296	180758880	176752912	208909472	173655520	0
sp|O60506-5|HNRPQ_HUMAN	FALSE	83114880	69282840	68519200	65898936	72474272	68259664	0
tr|F5GZQ3|F5GZQ3_HUMAN	FALSE	4.23673e+06	10124110	15074517	13234869	15634442	35140824	0.00191571
sp|Q9UMS4|PRP19_HUMAN;tr|F5GY56|F5GY56_HUMAN	FALSE	10715270	18825426	16376107	17818626	20615890	20659820	0
tr|A0A286YFB2|A0A286YFB2_HUMAN;tr|A0A286YER3|A0A286YER3_HUMAN;tr|A0A286YFC8|A0A286YFC8_HUMAN	FALSE	39050480	25497034	27040144	23888894	26408644	25055538	0.00241546
sp|P63313|TYB10_HUMAN	FALSE	88252288	71475648	75478480	100157512	101463344	90932032	0
sp|P60891-2|PRPS1_HUMAN	FALSE	55442860	56614604	65406736	71897792	75615888	73602736	0.00191571
tr|Q5ST81|Q5ST81_HUMAN	FALSE	433613088	384512960	370127648	416338656	401249632	380269472	0
sp|P27635|RL10_HUMAN	FALSE	7182866	6.99911e+06	5.70503e+06	10548041	5646032	10897852	0.00241546
tr|I3L312|I3L312_HUMAN	FALSE	43140152	61834400	48210700	62590440	64354372	63162100	0
sp|P42704|LPPRC_HUMAN	FALSE	22003896	22041416	20086534	22349306	25512260	23860348	0
tr|E9PS23|E9PS23_HUMAN	FALSE	267863024	242532624	229980752	247338720	279988096	261905744	0
tr|A0A024QZ42|A0A024QZ42_HUMAN	FALSE	25616454	20293690	21237200	24473518	25397666	19949666	0
tr|H7C1J8|H7C1J8_HUMAN	FALSE	9427503	9634348	9461159	11201885	9939013	10962094	0.00191571
tr|H0Y9R4|H0Y9R4_HUMAN	FALSE	11491792	28558384	26270150	30743384	36818816	33907180	0
sp|P49411|EFTU_HUMAN	FALSE	108673424	120721256	110714072	128330024	128611624	130721776	0
sp|P04406-2|G3P_HUMAN;tr|E7EUT5|E7EUT5_HUMAN;sp|P04406|G3P_HUMAN	FALSE	3435581184	3751561472	3639624960	4383107584	4581030912	4286236160	0
sp|O95757|HS74L_HUMAN;tr|E9PDE8|E9PDE8_HUMAN	FALSE	46039424	38612356	36970816	38476052	41477116	36249244	0.00241546
sp|P46778|RL21_HUMAN	FALSE	38679104	55830080	52053308	53499712	58707260	58553316	0
sp|P17987|TCPA_HUMAN	FALSE	25774654	28500620	26621016	31808124	33811380	29419886	0
tr|E9PG15|E9PG15_HUMAN	FALSE	161802592	147372448	139566576	180409824	168779920	172054432	0
tr|B4DDC6|B4DDC6_HUMAN	FALSE	9020939	8493952	6940536	12616021	10699223	9951824	0
sp|P16435|NCPR_HUMAN	FALSE	22340276	20673598	18455092	17839518	25753896	20357672	0
tr|E9PNE6|E9PNE6_HUMAN	FALSE	54551036	111191624	107009288	106221048	126179544	115996992	0
sp|P23284|PPIB_HUMAN	FALSE	330042720	315960576	273170848	323581728	325430528	340497792	0
sp|P09669|COX6C_HUMAN	FALSE	39065256	29550578	35849544	39100560	40553756	45002060	0.00241546
sp|Q8NBS9-2|TXND5_HUMAN;sp|Q8NBS9|TXND5_HUMAN	FALSE	428856	1.26413e+06	1323497	2.06967e+06	1.76262e+06	1.95759e+06	0.00191571
tr|J3KSJ0|J3KSJ0_HUMAN	FALSE	34104048	30957316	32212594	28098090	30511496	30820892	0.00191571
sp|P38159-2|RBMX_HUMAN	FALSE	35770044	36457456	38536660	39095460	43019208	38647740	0
sp|P62805|H4_HUMAN	FALSE	1238365056	1132821760	1143876480	1225865472	1245635584	1166136320	0
sp|Q14974|IMB1_HUMAN	FALSE	39029400	36237592	35277444	39831800	43400952	39676068	0
tr|F8VZY9|F8VZY9_HUMAN	FALSE	380052128	344234208	343882208	373046400	393877472	360025152	0
sp|P26038|MOES_HUMAN	FALSE	20975178	26133006	28614904	25936532	31074340	30818852	0
tr|F5H867|F5H867_HUMAN	FALSE	78113616	72016984	67304280	72553016	69069872	71743832	0
tr|F5H783|F5H783_HUMAN	FALSE	25948722	29041282	29764448	34822104	33895816	29685330	0
tr|A0A2R8Y5Y7|A0A2R8Y5Y7_HUMAN	FALSE	14074039	12032484	13101032	13895100	16293194	13412920	0
sp|Q8IYD1|ERF3B_HUMAN	FALSE	8163691	3.7893e+06	5.20905e+06	6.60952e+06	6922790	6729671	0
sp|Q9H0C2|ADT4_HUMAN	FALSE	131756336	113934272	77277160	73236600	80519384	82411744	0
tr|D6RA73|D6RA73_HUMAN	FALSE	33196844	44434544	43762376	51297720	52912176	55083692	0.00191571
tr|Q8J015|Q8J015_HUMAN	FALSE	43242568	40280576	44709040	46011400	48432736	48408788	0.00241546
sp|P40227|TCPZ_HUMAN	FALSE	104449960	117405224	104573640	106751448	124303432	130158448	0
tr|H3BP04|H3BP04_HUMAN	FALSE	3.71779e+06	7577467	9198051	6.16354e+06	9101027	14153010	0.00241546
sp|P61353|RL27_HUMAN	FALSE	56991160	48265292	47704332	53332844	61187372	40244436	0
tr|C9JZ88|C9JZ88_HUMAN	FALSE	37576704	34213332	38628260	38247364	40673736	46347380	0
tr|K7EQH4|K7EQH4_HUMAN	FALSE	88434504	75687600	72105520	77175000	72918496	68026320	0.00191571
sp|P46940|IQGA1_HUMAN;tr|A0A0J9YXZ5|A0A0J9YXZ5_HUMAN	FALSE	26886292	23853182	24013256	22304004	23694540	22789384	0
sp|Q9BVK6|TMED9_HUMAN	FALSE	30221202	20455996	25280032	33138102	2.02413e+06	7490890	0.00241546
sp|Q9Y617|SERC_HUMAN	FALSE	34956840	31601202	24684844	29059040	35434096	29397978	0
sp|P61927|RL37_HUMAN	FALSE	1.06091e+06	1.62334e+06	1.51269e+06	1.4202e+06	1.94564e+06	1.84656e+06	0
tr|Q5T8U2|Q5T8U2_HUMAN	FALSE	63902984	54636908	48877832	91766184	75607768	78733200	0
tr|F8VXH9|F8VXH9_HUMAN	FALSE	90803120	86081568	82413504	109453024	115491368	109179096	0
tr|H0YM50|H0YM50_HUMAN	FALSE	41630668	43043236	36792164	44817196	39855400	40882376	0
tr|I3L4M2|I3L4M2_HUMAN	FALSE	67151768	58312332	57818896	59895076	64931312	56447616	0
tr|K7ENJ4|K7ENJ4_HUMAN	FALSE	73706144	73267384	73552600	72950000	95982760	78504544	0
tr|F8VRH0|F8VRH0_HUMAN	FALSE	59873908	48905580	46730108	55500032	51253848	49926328	0
tr|J3KTJ3|J3KTJ3_HUMAN	FALSE	6.21128e+06	5.10803e+06	4539401	4.31917e+06	5.91624e+06	4742730	0
sp|Q58FG0|HS905_HUMAN	FALSE	602761216	615863552	579152256	586992832	643085568	629184768	0
sp|Q9H853|TBA4B_HUMAN	FALSE	56250488	63687440	64728648	100619992	85648200	74357472	0
tr|B5MCW2|B5MCW2_HUMAN	FALSE	25856334	29153690	29209630	35691236	35089532	28622986	0
sp|P62328|TYB4_HUMAN	FALSE	205787248	205078832	202724480	195587104	200151488	208400128	0
tr|B8ZZK4|B8ZZK4_HUMAN	FALSE	25174552	39809272	39384008	33052206	47105832	45424696	0
sp|Q5JNZ5|RS26L_HUMAN	FALSE	177758704	147648752	142334768	154576464	160302288	138812512	0.00191571
sp|P16989-3|YBOX3_HUMAN;sp|P16989|YBOX3_HUMAN	FALSE	7047050	7.32416e+06	7435093	7.92921e+06	9937034	8832212	0.00241546
tr|H0YEN5|H0YEN5_HUMAN	FALSE	80690944	107884296	114528240	97409648	129892016	108320816	0
tr|A0A087WUI2|A0A087WUI2_HUMAN	FALSE	79908368	164381696	177780336	143339152	184031184	160038160	0
tr|Q5JR95|Q5JR95_HUMAN	FALSE	148705088	130156792	131672280	142589792	143661360	144155776	0
tr|E7END7|E7END7_HUMAN	FALSE	26906198	16692028	16344642	19461504	16423990	15804070	0.00241546
sp|P17858-2|PFKAL_HUMAN;sp|P17858|PFKAL_HUMAN	FALSE	6810046	11176343	9444329	9349995	14320681	12403172	0.00114025
tr|C9JYY9|C9JYY9_HUMAN	FALSE	54996816	56438928	10985546	9953001	9791750	2701145	0
tr|A0A0C4DGC5|A0A0C4DGC5_HUMAN	FALSE	35349508	53008728	51907540	50253532	44054468	43967744	0
tr|F8WAM2|F8WAM2_HUMAN	FALSE	41892912	57459940	68548048	54381748	73542544	72789088	0
sp|P25705-3|ATPA_HUMAN	FALSE	80592592	87480552	83164040	80998776	73214808	69687768	0.00114025
sp|P08574|CY1_HUMAN	FALSE	4790792	7928709	7.22122e+06	8251140	9368107	8941319	0.00241546
tr|H0YH81|H0YH81_HUMAN	FALSE	38713516	39637932	41593208	46238172	47239540	39424056	0
sp|P84090|ERH_HUMAN	FALSE	55333580	50966472	49257704	47263684	55881028	52362112	0
sp|O15067|PUR4_HUMAN	FALSE	7877759	8890196	7.58804e+06	9642745	8664827	9322876	0.00241546
sp|P49368-2|TCPG_HUMAN	FALSE	116497584	101714280	100212888	105726048	109581688	100834448	0
sp|P50502|F10A1_HUMAN	FALSE	23012924	23052198	30485862	33732900	35171368	31996208	0
tr|A0A0C4DH44|A0A0C4DH44_HUMAN	FALSE	147796768	124550216	126506696	130595024	141031904	123715296	0.00191571
tr|C9JF79|C9JF79_HUMAN	FALSE	19181718	20408970	16424213	24175822	20292458	20124250	0
tr|I3L3D5|I3L3D5_HUMAN	FALSE	91157248	109373168	105512048	151136176	138092416	128668656	0
sp|Q15427|SF3B4_HUMAN;tr|Q5SZ64|Q5SZ64_HUMAN	FALSE	5.41724e+06	4580079	4.67167e+06	4.42018e+06	4.931e+06	3767727	0.00241546
tr|H0YMD9|H0YMD9_HUMAN	FALSE	8070115	12247429	7906924	12823983	12985327	14830022	0.00191571
tr|H0YAR2|H0YAR2_HUMAN	FALSE	8120631	15248334	12795519	13821867	17042638	15021151	0.00241546
sp|P05455|LA_HUMAN	FALSE	37217640	33619376	33001530	32645158	38621064	32880096	0.00241546
tr|G3V542|G3V542_HUMAN	FALSE	7.17437e+06	102950520	107950288	120735728	135988688	147300896	0.00241546
tr|I3L3U6|I3L3U6_HUMAN	FALSE	11682598	15519713	11522192	12778784	14679916	13468195	0.00191571
tr|E7ESE0|E7ESE0_HUMAN	FALSE	39230704	43810492	43538920	55351164	56065684	53749924	0
sp|Q96L21|RL10L_HUMAN	FALSE	81030584	65432528	59211624	62927440	67338176	63844536	0.00191571
tr|G3V4M8|G3V4M8_HUMAN	FALSE	50265916	79431888	53743780	109570584	113126672	107557032	0.00191571
tr|H7C044|H7C044_HUMAN	FALSE	23571100	21364430	22904208	24750058	27280700	25513172	0
sp|P14625|ENPL_HUMAN	FALSE	524404096	516860960	438039840	506419840	538408832	509277536	0
sp|Q58FF3|ENPLL_HUMAN	FALSE	11925104	17229288	14948790	16734276	18656606	16384039	0.00191571
sp|Q6PEY2|TBA3E_HUMAN	FALSE	30716476	43799784	41906024	45974272	48617928	44740440	0
sp|P63267|ACTH_HUMAN;sp|P62736|ACTA_HUMAN	FALSE	396542208	347668128	363130496	346482944	387438656	364393632	0
tr|M0QZN2|M0QZN2_HUMAN	FALSE	21820770	24255200	23550232	23353648	26060786	26118962	0
tr|D6RD83|D6RD83_HUMAN	FALSE	40580684	45912800	42260376	47944944	47598888	44700908	0
tr|Q5T0R8|Q5T0R8_HUMAN;tr|Q5T0S3|Q5T0S3_HUMAN	FALSE	1.86887e+06	7.28445e+06	7465372	4886394	10045266	9317625	0.00241546
sp|P80723-2|BASP1_HUMAN	FALSE	237119936	224392048	200577456	227815760	255911376	254839264	0
sp|P06733-2|ENOA_HUMAN	FALSE	1291319808	1256648832	1303667456	1177783040	1474587904	1408571776	0
sp|P10809|CH60_HUMAN	FALSE	916448640	868559552	824519232	903712320	998571200	919885056	0
sp|P48643-2|TCPE_HUMAN	FALSE	32183924	24644638	40619276	23645560	49170980	39066756	0
sp|P04843|RPN1_HUMAN	FALSE	3.63241e+06	7.68886e+06	10489456	7980259	7.27057e+06	8.05268e+06	0.00191571
sp|P07919|QCR6_HUMAN	FALSE	14300851	17822576	20334746	17763144	23227976	21973478	0.00241546
tr|K7EJ44|K7EJ44_HUMAN	FALSE	262703536	282430464	266104608	285198080	305925408	282874688	0
sp|P62851|RS25_HUMAN	FALSE	251910672	230464400	222929744	229890528	225975936	218211920	0
tr|A0A1W2PP35|A0A1W2PP35_HUMAN	FALSE	369429984	350340960	332904576	360401024	372960160	335998688	0
sp|P09234|RU1C_HUMAN;tr|A0A0A0MRR7|A0A0A0MRR7_HUMAN	FALSE	2.61274e+06	3.72871e+06	3.19732e+06	3.32885e+06	4.26795e+06	3.83724e+06	0
sp|P22234|PUR6_HUMAN;sp|P22234-2|PUR6_HUMAN	FALSE	18775150	20678680	20720960	23635492	21659086	21124846	0
tr|B4DNK4|B4DNK4_HUMAN	FALSE	473303648	421753280	400395264	399733280	422436896	406589408	0
tr|A6NIW5|A6NIW5_HUMAN	FALSE	24973044	24946346	26534296	30280362	37956384	37071972	0
tr|J3QRQ7|J3QRQ7_HUMAN	FALSE	29033624	29152840	27135606	30654748	29043844	28494600	0.00241546
sp|P62280|RS11_HUMAN	FALSE	60522360	60664972	53836644	58951264	69577512	60159692	0
tr|H7C4C8|H7C4C8_HUMAN	FALSE	108321776	111145872	112150592	117263008	123786184	114805480	0
tr|A0A3B3ITI4|A0A3B3ITI4_HUMAN	FALSE	25345346	20388820	25153104	32119392	30470252	27523182	0
sp|P31153|METK2_HUMAN	FALSE	3921579	6.10536e+06	5971879	5684247	6.48725e+06	6529791	0.00241546
sp|P34932|HSP74_HUMAN	FALSE	35439240	31731292	33496238	37707964	40276172	47936836	0
tr|H3BNU3|H3BNU3_HUMAN	FALSE	2.66094e+06	10602880	8436219	5.44062e+06	12668879	10811126	0.00241546
sp|Q99832-4|TCPH_HUMAN	FALSE	33299066	26198730	23634130	24686782	29585958	31027824	0
tr|M0R042|M0R042_HUMAN	FALSE	210860464	395444960	410247424	407621184	447640416	436375296	0
tr|D6RED7|D6RED7_HUMAN	FALSE	17269974	18857878	19713090	23567134	23073348	26135066	0.00241546
sp|P28066|PSA5_HUMAN	FALSE	31789234	37066704	35797148	36061056	40998000	41061496	0
tr|D6RBM0|D6RBM0_HUMAN	TRUE	47305868	44787004	41360680	37598340	47530680	43152720	0.00191571
sp|P62424|RL7A_HUMAN	FALSE	43222876	51291496	50081660	47059236	54340064	54984672	0
sp|Q96QK1|VPS35_HUMAN	FALSE	16037331	15856051	17095838	16992278	19153504	14798389	0
tr|H0YBG6|H0YBG6_HUMAN	FALSE	44064704	44517020	42947936	50980092	53288804	48931560	0.00191571
tr|Q5RI18|Q5RI18_HUMAN	FALSE	70159288	67447368	63401340	60353464	73244968	71626520	0
sp|P00966|ASSY_HUMAN	FALSE	51338692	45845956	47873516	48531932	48278148	50100832	0
tr|X1WI28|X1WI28_HUMAN	FALSE	7.85497e+06	14521372	15510407	13384292	15387426	14797849	0.00191571
tr|I3L239|I3L239_HUMAN	FALSE	359652640	319733632	324420448	360791392	353940512	336009376	0.00191571
tr|E9PM13|E9PM13_HUMAN	FALSE	38218320	36233568	35960852	37015456	37884788	37208800	0
tr|F8WD59|F8WD59_HUMAN	FALSE	249520464	227494384	225974880	243803008	253634896	236064400	0.00191571
sp|P24534|EF1B_HUMAN	FALSE	149794704	125118856	114924200	112849256	121261024	118571600	0
sp|P62745|RHOB_HUMAN	FALSE	3.51255e+06	5107266	4.78116e+06	5712527	7219250	6.61948e+06	0.00241546
tr|E5RI98|E5RI98_HUMAN	FALSE	1038267776	917621760	902414016	928392256	994059904	905226688	0
sp|O75347-2|TBCA_HUMAN	FALSE	30617700	28438834	27754372	31187710	33453918	29432484	0.00191571
sp|Q6ZNX1|SHLD3_HUMAN	FALSE	36878068	32723426	33708856	0	0	0	0.00537222
sp|P00403|COX2_HUMAN	FALSE	33164204	27880980	30642116	28298388	29523010	28483754	0.00191571
sp|P05388|RLA0_HUMAN	FALSE	52147316	49224160	47184228	48301448	47931084	46273264	0
tr|A0A2R8YEA7|A0A2R8YEA7_HUMAN	FALSE	1045430848	3779987712	3955345664	3654261504	4729814528	4325483520	0
tr|Q5JP01|Q5JP01_HUMAN	FALSE	18700506	17968314	18410868	20898556	17656332	14279559	0.00191571
tr|F8WCR1|F8WCR1_HUMAN	FALSE	33865684	75035168	74082488	66758512	84759888	73736768	0
sp|P28070|PSB4_HUMAN	FALSE	13532013	14353407	16449848	17957492	17625344	15366085	0
tr|H0YIC4|H0YIC4_HUMAN	FALSE	103797608	96846424	37778532	40180940	39728500	38263820	0
sp|Q02878|RL6_HUMAN	FALSE	149985152	152562272	147892736	154625616	158536544	155926928	0
tr|G3XAL0|G3XAL0_HUMAN	FALSE	134844464	120616800	111991864	142788656	139612800	129760608	0
sp|P60228|EIF3E_HUMAN	FALSE	11795550	9732201	7.73301e+06	7483849	9787452	8.02642e+06	0.00241546
tr|F5GZI0|F5GZI0_HUMAN	FALSE	84839128	84528360	83709984	86340080	131634344	78168328	0.00241546

## Sheet: DE_1.2vs1
ProteinGroup	Decoy	Quantity_1	Quantity_2	Quantity_3	Quantity_4	Quantity_5	Quantity_6	QValue
sp|O75340|PDCD6_HUMAN;sp|O75340-2|PDCD6_HUMAN;tr|A0A024QZ42|A0A024QZ42_HUMAN	FALSE	42813740	35455012	42715620	36350612	53311120	37931524	0
tr|A0A0U1RRM4|A0A0U1RRM4_HUMAN;sp|P26599-3|PTBP1_HUMAN;sp|P26599-2|PTBP1_HUMAN;sp|P26599|PTBP1_HUMAN;tr|A6NLN1|A6NLN1_HUMAN	FALSE	16273590	14559151	17133728	22418444	30163054	20329872	0.00160128
tr|F5GZS6|F5GZS6_HUMAN;sp|P08195-3|4F2_HUMAN;sp|P08195-4|4F2_HUMAN;tr|J3KPF3|J3KPF3_HUMAN;sp|P08195-2|4F2_HUMAN;sp|P08195|4F2_HUMAN	FALSE	270686720	205912640	235021136	221847472	299570496	219466304	0.000980392
sp|Q00341|VIGLN_HUMAN;sp|Q00341-2|VIGLN_HUMAN;tr|C9JIZ1|C9JIZ1_HUMAN;tr|C9JHZ8|C9JHZ8_HUMAN;tr|C9JK79|C9JK79_HUMAN;tr|C9JES8|C9JES8_HUMAN;tr|C9J5E5|C9J5E5_HUMAN;tr|A0A024R4E5|A0A024R4E5_HUMAN;tr|C9JHS7|C9JHS7_HUMAN;tr|C9JZI8|C9JZI8_HUMAN;tr|C9JT62|C9JT62_HUMAN	FALSE	4995093	6683087	7255560	6795405	7.38037e+06	6839139	0.00160128
sp|P22695|QCR2_HUMAN;tr|H3BSJ9|H3BSJ9_HUMAN;tr|H3BRG4|H3BRG4_HUMAN	FALSE	3.01222e+06	6645455	7.52539e+06	5970122	8436148	6962890	0.000980392
sp|Q8NFI4|F10A5_HUMAN	FALSE	35476952	24360454	29116648	26305292	33843844	22590952	0.00160128
tr|C9JSQ1|C9JSQ1_HUMAN;sp|P12532-2|KCRU_HUMAN;tr|F8WCN3|F8WCN3_HUMAN;sp|P12532|KCRU_HUMAN	FALSE	10160442	6.86354e+06	9620984	7282365	12101912	8.15041e+06	0
sp|Q07020|RL18_HUMAN;tr|F8VUA6|F8VUA6_HUMAN;sp|Q07020-2|RL18_HUMAN;tr|H0YHA7|H0YHA7_HUMAN;tr|J3QQ67|J3QQ67_HUMAN	FALSE	31146268	24591582	29890018	23615054	37538420	26711080	0.000980392
sp|Q92526-2|TCPW_HUMAN	FALSE	48515832	31693988	30521478	25463212	45261052	21800228	0
tr|E5RH77|E5RH77_HUMAN	FALSE	48948700	41945240	43777964	36141492	51630612	36047212	0.000980392
sp|Q9NQH7-2|XPP3_HUMAN;sp|Q9NQH7-3|XPP3_HUMAN;sp|Q9NQH7|XPP3_HUMAN;sp|Q9NQH7-5|XPP3_HUMAN;sp|Q9NQH7-4|XPP3_HUMAN	FALSE	275008352	191296832	254870528	222129392	291286656	211536288	0.000980392
sp|P62263|RS14_HUMAN;tr|A0A2R8Y811|A0A2R8Y811_HUMAN	FALSE	76566768	61463840	69505096	65939116	80269048	70189736	0.000980392
tr|A0A0D9SG12|A0A0D9SG12_HUMAN;tr|A0A2R8YCW1|A0A2R8YCW1_HUMAN;tr|A0A0D9SF53|A0A0D9SF53_HUMAN;tr|A0A2R8Y4A4|A0A2R8Y4A4_HUMAN;tr|A0A2R8YDT5|A0A2R8YDT5_HUMAN;tr|A0A2R8Y5G6|A0A2R8Y5G6_HUMAN;tr|A0A0D9SFB3|A0A0D9SFB3_HUMAN;tr|A0A2R8Y7T2|A0A2R8Y7T2_HUMAN;tr|A0A2R8YFS5|A0A2R8YFS5_HUMAN;tr|A0A2R8YFR4|A0A2R8YFR4_HUMAN;tr|A0A2R8YF78|A0A2R8YF78_HUMAN;tr|A0A2U3TZJ9|A0A2U3TZJ9_HUMAN;tr|F6S8Q4|F6S8Q4_HUMAN;sp|O…	FALSE	7.39914e+06	6.6164e+06	6915221	8091012	9861000	8103823	0.000980392
sp|Q8TDB8-2|GTR14_HUMAN;sp|P11169|GTR3_HUMAN;sp|Q8TDB8|GTR14_HUMAN;sp|Q8TDB8-5|GTR14_HUMAN;sp|Q8TDB8-4|GTR14_HUMAN	FALSE	0	14117254	91528328	127863080	139097200	3517007	0.003885
tr|Q5T123|Q5T123_HUMAN;sp|Q9H299|SH3L3_HUMAN	FALSE	6.9501e+06	32705008	93582488	84593808	80041760	105079624	0.00160128
sp|O75828|CBR3_HUMAN;sp|P16152-2|CBR1_HUMAN;tr|E9PQ63|E9PQ63_HUMAN;tr|A8MTM1|A8MTM1_HUMAN	FALSE	8.01069e+06	12316621	58005116	53024856	56385312	18955840	0.00160128
sp|P42765|THIM_HUMAN;tr|K7ER88|K7ER88_HUMAN;tr|K7EME0|K7EME0_HUMAN;tr|K7EJB1|K7EJB1_HUMAN;tr|K7EJ68|K7EJ68_HUMAN;tr|A0A0B4J2A4|A0A0B4J2A4_HUMAN	FALSE	80890560	130337240	52451708	173878704	62877348	136139824	0.003885
sp|P30153|2AAA_HUMAN;tr|B3KQV6|B3KQV6_HUMAN;tr|H0YDG7|H0YDG7_HUMAN;sp|P30154-2|2AAB_HUMAN;sp|P30154-3|2AAB_HUMAN;sp|P30154-4|2AAB_HUMAN;sp|P30154|2AAB_HUMAN;sp|P30154-5|2AAB_HUMAN	FALSE	7347301	10574981	6751492	7654268	9211186	6253963	0.00160128
sp|P26583|HMGB2_HUMAN	FALSE	60515808	52749744	60563360	48085128	77331472	58181196	0
sp|P39656-2|OST48_HUMAN;sp|P39656-3|OST48_HUMAN;sp|P39656|OST48_HUMAN;tr|A0A0C4DGS1|A0A0C4DGS1_HUMAN;tr|U3KQ84|U3KQ84_HUMAN	FALSE	7.34924e+06	8.04641e+06	10437530	9073006	11787292	11628481	0.000980392
sp|P63092|GNAS2_HUMAN;tr|A0A087WZE5|A0A087WZE5_HUMAN;tr|Q5JWE9|Q5JWE9_HUMAN;sp|P19087|GNAT2_HUMAN;sp|A8MTJ3|GNAT3_HUMAN;tr|A0A1W2PS82|A0A1W2PS82_HUMAN;sp|P04899|GNAI2_HUMAN;sp|P63092-2|GNAS2_HUMAN;tr|Q5JWD1|Q5JWD1_HUMAN;sp|P38405|GNAL_HUMAN;sp|P09471-2|GNAO_HUMAN;tr|H0Y7E8|H0Y7E8_HUMAN;sp|P11488|GNAT1_HUMAN;sp|P08754|GNAI3_HUMAN;sp|P63092-4|GNAS2_HUMAN;sp|P38405-2|GNAL_HUMAN;tr|A0A1W2PQK2|A0A1W2P…	FALSE	27274072	19278768	22928508	14894985	24826128	20431514	0.00160128
sp|Q6NVV1|R13P3_HUMAN	FALSE	101168912	77354344	90337832	72275712	94245416	71683616	0
sp|Q13200-2|PSMD2_HUMAN;sp|Q13200|PSMD2_HUMAN;sp|Q13200-3|PSMD2_HUMAN	FALSE	30777938	28902090	32863786	29671154	40162264	32948848	0
sp|Q562R1|ACTBL_HUMAN	FALSE	87612984	55007688	67775584	94103096	65132532	2.92097e+06	0
tr|C9K0S6|C9K0S6_HUMAN	FALSE	35164576	58102648	66147224	95623584	115141192	101479864	0.00160128
sp|P62829|RL23_HUMAN	FALSE	33288216	21851578	32057648	26648422	35180856	29818112	0.000980392
sp|Q15717|ELAV1_HUMAN;sp|Q15717-2|ELAV1_HUMAN	FALSE	40200968	33209506	39497256	33169920	42105272	50613312	0.00160128
tr|F5GXH2|F5GXH2_HUMAN	FALSE	145764672	99644848	130809720	106899472	137080144	108831408	0
tr|H0Y449|H0Y449_HUMAN;sp|P67809|YBOX1_HUMAN	FALSE	15442683	7.64202e+06	21259630	8981022	18320336	18101918	0.000980392
tr|E5RIZ6|E5RIZ6_HUMAN;tr|E5RJU8|E5RJU8_HUMAN;tr|E5RH42|E5RH42_HUMAN;tr|E5RIF8|E5RIF8_HUMAN;tr|E5RI46|E5RI46_HUMAN;sp|Q13283-2|G3BP1_HUMAN	FALSE	74178264	82343736	7.42152e+06	7.73902e+06	10727052	5.5988e+06	0.00160128
tr|E9PR30|E9PR30_HUMAN;sp|P62861|RS30_HUMAN	FALSE	74233384	52472588	68976984	52090228	76072776	56504592	0
sp|P14618-2|KPYM_HUMAN	FALSE	525346432	513308928	614942464	560006272	745304000	552206272	0
sp|P09493-3|TPM1_HUMAN;tr|A0A2R8YH90|A0A2R8YH90_HUMAN;tr|K7ENT6|K7ENT6_HUMAN;tr|F5H7S3|F5H7S3_HUMAN;tr|D6R904|D6R904_HUMAN;tr|H0YNC7|H0YNC7_HUMAN;tr|Q6ZN40|Q6ZN40_HUMAN;tr|Q5TCU8|Q5TCU8_HUMAN;tr|A0A0S2Z4G6|A0A0S2Z4G6_HUMAN;tr|B7Z596|B7Z596_HUMAN;tr|H0YKX5|H0YKX5_HUMAN;tr|A7XZE4|A7XZE4_HUMAN;sp|P67936|TPM4_HUMAN;sp|P07951|TPM2_HUMAN;tr|H0YL80|H0YL80_HUMAN;sp|P09493-6|TPM1_HUMAN;tr|A0A2R8Y5V9|A0A2R…	FALSE	43569856	47299420	42011840	38203348	40830764	35037904	0.000980392
tr|F8WCJ1|F8WCJ1_HUMAN;tr|C9J4W5|C9J4W5_HUMAN;tr|C9J7B5|C9J7B5_HUMAN;sp|Q9GZV4|IF5A2_HUMAN;sp|Q6IS14|IF5AL_HUMAN	FALSE	113308976	158052240	187074272	161129296	215971360	175142960	0
tr|D6R9B6|D6R9B6_HUMAN	FALSE	99681504	105088296	138850608	121823168	173436208	124583504	0
sp|P17174-2|AATC_HUMAN;sp|P17174|AATC_HUMAN	FALSE	12746951	7358823	8686537	7498493	11438795	8.35194e+06	0.003885
sp|P06753-7|TPM3_HUMAN;tr|Q5VU61|Q5VU61_HUMAN	FALSE	20844516	20772198	22662580	20689302	31388102	24433370	0
tr|H3BV69|H3BV69_HUMAN;tr|H3BRM5|H3BRM5_HUMAN;sp|P20674|COX5A_HUMAN	FALSE	71752352	57997000	65762324	58777140	81080592	59084128	0
sp|O75390|CISY_HUMAN;tr|B4DJV2|B4DJV2_HUMAN;tr|A0A0C4DGI3|A0A0C4DGI3_HUMAN	FALSE	39910840	40371976	39623464	27032838	49760900	42516720	0.000980392
tr|J3QLN6|J3QLN6_HUMAN;tr|J3QKZ9|J3QKZ9_HUMAN;tr|J3KS25|J3KS25_HUMAN	FALSE	66991180	64119220	71174008	61960436	86821128	64361480	0.000980392
tr|H0YNX6|H0YNX6_HUMAN	FALSE	13526653	24193558	11029752	20650652	27213156	16060528	0.000980392
sp|Q13148|TADBP_HUMAN;tr|B1AKP7|B1AKP7_HUMAN;tr|G3V162|G3V162_HUMAN;tr|A0A0A0MSV7|A0A0A0MSV7_HUMAN;tr|K7EN94|K7EN94_HUMAN;tr|K7EJ99|K7EJ99_HUMAN;tr|A0A087X260|A0A087X260_HUMAN;tr|A0A0A0N0M3|A0A0A0N0M3_HUMAN;tr|A0A1W2PNU8|A0A1W2PNU8_HUMAN;tr|K7EJM5|K7EJM5_HUMAN;tr|A0A087WX29|A0A087WX29_HUMAN;tr|A0A087WYY0|A0A087WYY0_HUMAN	FALSE	3261657	3.69834e+06	3591089	4.21317e+06	5.25175e+06	3478515	0.000980392
tr|C9J5W6|C9J5W6_HUMAN;sp|Q9UI15|TAGL3_HUMAN	FALSE	20331072	14097407	16170344	15711319	15928185	10302118	0.000980392
sp|P14618-3|KPYM_HUMAN	FALSE	370118496	290430528	358164256	290481248	408443072	314272000	0
sp|P12277|KCRB_HUMAN	FALSE	69924592	72901304	79663904	69934288	91230152	56946180	0
tr|C9JSA6|C9JSA6_HUMAN;tr|F8WC71|F8WC71_HUMAN;tr|C9JTY5|C9JTY5_HUMAN;tr|C9J0A4|C9J0A4_HUMAN;tr|C9J5V4|C9J5V4_HUMAN;tr|H3BSP4|H3BSP4_HUMAN;sp|P57723-2|PCBP4_HUMAN;tr|C9JZY3|C9JZY3_HUMAN;tr|C9IZV9|C9IZV9_HUMAN;tr|C9J7A9|C9J7A9_HUMAN;tr|C9K0A2|C9K0A2_HUMAN;sp|P57723|PCBP4_HUMAN	FALSE	168056528	136732848	111605864	90153736	112951984	85390240	0.000980392
tr|A0A087WUK2|A0A087WUK2_HUMAN;sp|O14979-2|HNRDL_HUMAN;sp|O14979|HNRDL_HUMAN;sp|O14979-3|HNRDL_HUMAN	FALSE	60903348	54284476	66858392	59037224	74649256	58746948	0
tr|G3V2W4|G3V2W4_HUMAN	FALSE	26301922	22233246	22933636	20938208	28500702	20272686	0.000980392
tr|K7EM20|K7EM20_HUMAN	FALSE	106841520	69021472	123853704	115242480	171662688	74210016	0.000980392
sp|P50990|TCPQ_HUMAN	FALSE	129261336	66656984	90296848	80228672	107699088	78689056	0
tr|I3L192|I3L192_HUMAN;sp|P35613-2|BASI_HUMAN;sp|P35613|BASI_HUMAN;tr|A0A087X2B5|A0A087X2B5_HUMAN	FALSE	76826288	49879880	67826192	48305908	72044960	53269676	0
tr|E9PCY7|E9PCY7_HUMAN;tr|G8JLB6|G8JLB6_HUMAN;sp|P31943|HNRH1_HUMAN	FALSE	20927838	21737084	30734436	28350674	35737436	28369618	0.000980392
sp|O00267-2|SPT5H_HUMAN;sp|O00267|SPT5H_HUMAN	FALSE	606312	1.7706e+06	1.99953e+06	1.32652e+06	2.71519e+06	1.65412e+06	0.00160128
tr|C9K073|C9K073_HUMAN;tr|C9JF13|C9JF13_HUMAN;tr|C9J6B6|C9J6B6_HUMAN;tr|C9J2Z7|C9J2Z7_HUMAN	FALSE	11549033	8034733	8941366	7.26863e+06	11680471	8128951	0
tr|K7ELC7|K7ELC7_HUMAN	FALSE	27496400	46355456	43181336	35477424	61470876	35370488	0.000980392
tr|G8JLA2|G8JLA2_HUMAN;tr|J3KND3|J3KND3_HUMAN;tr|F8W1I5|F8W1I5_HUMAN;tr|F8VPF3|F8VPF3_HUMAN;tr|G3V1V0|G3V1V0_HUMAN;sp|P14649|MYL6B_HUMAN;sp|P60660-2|MYL6_HUMAN;sp|P60660|MYL6_HUMAN;tr|B7Z6Z4|B7Z6Z4_HUMAN;tr|F8W1R7|F8W1R7_HUMAN	FALSE	47303176	35766492	41115856	37849716	52007092	40364148	0
tr|H3BSC1|H3BSC1_HUMAN;tr|H3BMH2|H3BMH2_HUMAN;sp|P62491|RB11A_HUMAN;sp|Q15907|RB11B_HUMAN;tr|B4DQU5|B4DQU5_HUMAN;sp|Q15907-2|RB11B_HUMAN;sp|P62491-2|RB11A_HUMAN	FALSE	16513094	12295468	12996291	10887484	14817681	9841264	0
tr|H7C561|H7C561_HUMAN;sp|Q15637-3|SF01_HUMAN;sp|Q15637-6|SF01_HUMAN;sp|Q15637-5|SF01_HUMAN;sp|Q15637|SF01_HUMAN;sp|Q15637-2|SF01_HUMAN;sp|Q15637-7|SF01_HUMAN;sp|Q15637-4|SF01_HUMAN	FALSE	9336912	4395505	7177709	6.60943e+06	8.14249e+06	6465407	0.000980392
sp|Q14247-2|SRC8_HUMAN;sp|Q14247-3|SRC8_HUMAN;sp|Q14247|SRC8_HUMAN	FALSE	551518	2.6753e+06	2.94251e+06	1.88086e+06	3.79819e+06	3.51362e+06	0.00160128
tr|D3YTB1|D3YTB1_HUMAN;tr|F8W727|F8W727_HUMAN;sp|P62910|RL32_HUMAN	FALSE	126837248	137151296	158991152	131909112	186986240	142443680	0
sp|Q96E39|RMXL1_HUMAN	FALSE	4.08434e+06	4.03724e+06	3.57051e+06	4684302	5.13007e+06	4.03834e+06	0.00160128
sp|Q13162|PRDX4_HUMAN	FALSE	10799020	20383524	29240510	18821158	36109800	20024606	0.000980392
tr|A0A087WVQ6|A0A087WVQ6_HUMAN;sp|Q00610-2|CLH1_HUMAN;sp|Q00610|CLH1_HUMAN	FALSE	111576136	124125256	155638672	137486032	203933888	170331760	0
tr|A0A087X0R6|A0A087X0R6_HUMAN;sp|Q9UMY4-2|SNX12_HUMAN;sp|Q9UMY4|SNX12_HUMAN	FALSE	6.70543e+06	7.15739e+06	11254843	12787652	12657704	10249109	0.000980392
tr|F8WEJ5|F8WEJ5_HUMAN	FALSE	27500360	20830948	25244036	19796256	27543616	17310034	0.000980392
tr|B3KM87|B3KM87_HUMAN;sp|P43243-2|MATR3_HUMAN	FALSE	2715660	9988428	11598142	6.16139e+06	19268092	15359818	0.000980392
tr|D6RJ96|D6RJ96_HUMAN	FALSE	21981044	12577238	19256910	9186743	32963450	22662914	0.000980392
tr|F8W0W8|F8W0W8_HUMAN;tr|F8VR82|F8VR82_HUMAN;tr|E7ETD8|E7ETD8_HUMAN;tr|E9PMD7|E9PMD7_HUMAN;tr|C9JP48|C9JP48_HUMAN;sp|P36873|PP1G_HUMAN;sp|P62136-2|PP1A_HUMAN;sp|P62136|PP1A_HUMAN;tr|C9J9S3|C9J9S3_HUMAN;tr|F8VYE8|F8VYE8_HUMAN;sp|P62136-3|PP1A_HUMAN;sp|P62140|PP1B_HUMAN;sp|P36873-2|PP1G_HUMAN;tr|A0A087WYY5|A0A087WYY5_HUMAN	FALSE	7.34541e+06	7189797	8069565	6.08172e+06	9012820	5.85782e+06	0
tr|C9JJQ8|C9JJQ8_HUMAN;tr|C9JEV8|C9JEV8_HUMAN;tr|C9JQ00|C9JQ00_HUMAN	FALSE	17961670	10613799	12451820	8918224	12045043	8996120	0.000980392
sp|P30086|PEBP1_HUMAN	FALSE	138469456	107251120	123131968	104065296	144507872	106912360	0
tr|H0YAB0|H0YAB0_HUMAN	FALSE	79030144	52776812	69673816	51423520	80241176	55383364	0
tr|D6RF23|D6RF23_HUMAN	FALSE	51945500	53221112	53282304	42252528	55174032	43010288	0
sp|P05388-2|RLA0_HUMAN;tr|F8VWS0|F8VWS0_HUMAN	FALSE	50778708	39475272	38370432	47584592	57004560	38208076	0.00160128
tr|C9JXG8|C9JXG8_HUMAN;sp|P43487-2|RANG_HUMAN;tr|C9JGV6|C9JGV6_HUMAN;tr|F6WQW2|F6WQW2_HUMAN;sp|P43487|RANG_HUMAN	FALSE	20624688	13938657	20873540	22563514	29713252	21015526	0
sp|Q08209-2|PP2BA_HUMAN;sp|Q08209|PP2BA_HUMAN;sp|Q08209-3|PP2BA_HUMAN;tr|E7ETC2|E7ETC2_HUMAN;sp|Q08209-5|PP2BA_HUMAN	FALSE	78323.3	266786	578778	134998	950668	700755	0.00160128
tr|U3KQA9|U3KQA9_HUMAN;tr|Q5JR07|Q5JR07_HUMAN;tr|E9PN11|E9PN11_HUMAN;tr|Q5JR08|Q5JR08_HUMAN;tr|E9PLA2|E9PLA2_HUMAN;tr|C9JX21|C9JX21_HUMAN;sp|P61586|RHOA_HUMAN;tr|U3KQV3|U3KQV3_HUMAN;tr|E9PQH6|E9PQH6_HUMAN;tr|Q5JR05|Q5JR05_HUMAN;tr|Q5JR06|Q5JR06_HUMAN;tr|C9JRM1|C9JRM1_HUMAN;tr|C9JNR4|C9JNR4_HUMAN;sp|P08134|RHOC_HUMAN	FALSE	38950884	33033306	34167796	31296392	44766576	31722362	0.000980392
tr|H0Y3P2|H0Y3P2_HUMAN;tr|H0YCH5|H0YCH5_HUMAN;sp|P78344-2|IF4G2_HUMAN;sp|P78344|IF4G2_HUMAN;tr|D3DQV9|D3DQV9_HUMAN	FALSE	392779	1.47284e+06	1.45488e+06	1.09039e+06	1.74728e+06	1.20004e+06	0.00160128
sp|Q71DI3|H32_HUMAN;tr|K7EK07|K7EK07_HUMAN;sp|P68431|H31_HUMAN;sp|Q16695|H31T_HUMAN;sp|P84243|H33_HUMAN	FALSE	239728096	179867760	172069376	136692320	175604368	130478176	0.000980392
XXX_tr|A0A087WVS3|A0A087WVS3_HUMAN;XXX_tr|A0A087WVW4|A0A087WVW4_HUMAN;XXX_sp|O43548-2|TGM5_HUMAN;XXX_tr|A0A087WZC4|A0A087WZC4_HUMAN;XXX_sp|O43548|TGM5_HUMAN	TRUE	13833618	11885408	10603416	14697993	16945168	11094014	0.00160128
tr|B5MD38|B5MD38_HUMAN;sp|P55084-2|ECHB_HUMAN;sp|P55084|ECHB_HUMAN	FALSE	11236174	9388282	12209943	9126669	13663633	9728589	0.00160128
tr|E9PRC8|E9PRC8_HUMAN	FALSE	6.29094e+06	11262043	16120794	14382129	12879555	11158415	0.000980392
tr|F5GY55|F5GY55_HUMAN;sp|Q16531|DDB1_HUMAN	FALSE	11685699	8725720	12450366	10417494	15758578	15914146	0
tr|E7EM57|E7EM57_HUMAN;tr|E7EUI8|E7EUI8_HUMAN;sp|P11413|G6PD_HUMAN;sp|P11413-2|G6PD_HUMAN;sp|P11413-3|G6PD_HUMAN	FALSE	47784684	33869180	37778736	36013192	43765992	30940664	0
tr|H3BNX8|H3BNX8_HUMAN	FALSE	148222320	89049688	126426976	99239832	139184368	85810528	0.00160128
tr|A0A2R8Y5P0|A0A2R8Y5P0_HUMAN;sp|P35241-3|RADI_HUMAN	FALSE	59259532	48332036	56973004	51940972	66163980	48949100	0.000980392
sp|P13804-2|ETFA_HUMAN;sp|P13804|ETFA_HUMAN	FALSE	43856356	37401936	41866888	33519366	45489552	33459512	0
sp|P68366|TBA4A_HUMAN;sp|P68366-2|TBA4A_HUMAN	FALSE	14658447	11662288	16675235	18817844	19045928	18755344	0.000980392
sp|Q8NC51-4|PAIRB_HUMAN;sp|Q8NC51-2|PAIRB_HUMAN	FALSE	128332608	90413944	107528256	97567776	131939248	101810232	0
tr|J3KT73|J3KT73_HUMAN;tr|J3QL01|J3QL01_HUMAN	FALSE	52023252	38881568	44592904	36580868	52767264	49074804	0
tr|Q5T3N0|Q5T3N0_HUMAN	FALSE	8352944	14575829	17944952	7690028	19996172	19931002	0
tr|F8W0P7|F8W0P7_HUMAN	FALSE	73396832	63239548	69669976	61152304	82582256	60109184	0.000980392
sp|P08174-4|DAF_HUMAN;tr|H3BLV0|H3BLV0_HUMAN;sp|P08174-2|DAF_HUMAN;tr|B1AP13|B1AP13_HUMAN;sp|P08174-3|DAF_HUMAN;sp|P08174|DAF_HUMAN;sp|P08174-6|DAF_HUMAN;tr|H7BY55|H7BY55_HUMAN;sp|P08174-7|DAF_HUMAN;sp|P08174-5|DAF_HUMAN	FALSE	27735598	23052296	49732920	51266136	53135736	36256376	0.000980392
sp|Q53GS9|SNUT2_HUMAN;tr|A0A087X1B2|A0A087X1B2_HUMAN;sp|Q53GS9-2|SNUT2_HUMAN	FALSE	136678	420307	515980	292563	764981	435260	0.00160128
sp|Q99714|HCD2_HUMAN	FALSE	72954344	725865	49671300	8304427	55410220	3.16154e+06	0.000980392
sp|P25786|PSA1_HUMAN;sp|P25786-2|PSA1_HUMAN;tr|F5GX11|F5GX11_HUMAN	FALSE	40311832	29091984	39039352	34827008	45779500	36002392	0.000980392
tr|Q5JP02|Q5JP02_HUMAN;sp|Q09028|RBBP4_HUMAN;sp|Q09028-4|RBBP4_HUMAN;sp|Q09028-2|RBBP4_HUMAN;sp|Q09028-3|RBBP4_HUMAN;tr|H0YDK2|H0YDK2_HUMAN;tr|H0YCT5|H0YCT5_HUMAN;tr|H0YF10|H0YF10_HUMAN	FALSE	21111946	14632103	17125582	14213293	20442052	17366132	0
sp|Q15424|SAFB1_HUMAN;sp|Q15424-2|SAFB1_HUMAN;tr|K7EII0|K7EII0_HUMAN;sp|Q15424-3|SAFB1_HUMAN;sp|Q15424-4|SAFB1_HUMAN	FALSE	908604	2.62153e+06	3.08408e+06	3084157	4.81804e+06	3597532	0.00160128
XXX_tr|V9GYG9|V9GYG9_HUMAN;XXX_sp|P02652|APOA2_HUMAN;XXX_tr|V9GYE3|V9GYE3_HUMAN;XXX_tr|V9GYM3|V9GYM3_HUMAN	TRUE	10029501	8.35426e+06	11246633	8119543	12640756	7729191	0.00239617
tr|B4DEB1|B4DEB1_HUMAN;tr|K7EMV3|K7EMV3_HUMAN;tr|K7ES00|K7ES00_HUMAN	FALSE	309969856	242491824	279718304	253031424	312492768	225513728	0.00160128
tr|A0A2R8YFE2|A0A2R8YFE2_HUMAN	FALSE	1642365184	1189188608	1362082432	1113415168	1429535616	1092049536	0
tr|E9PD24|E9PD24_HUMAN;tr|E5RIR4|E5RIR4_HUMAN;tr|E7EVZ2|E7EVZ2_HUMAN;tr|E5RGE1|E5RGE1_HUMAN	FALSE	184597552	139107408	151267904	172026608	227181520	162021280	0
sp|P78417-2|GSTO1_HUMAN;sp|P78417|GSTO1_HUMAN	FALSE	28091266	12285332	15857727	14955793	20852906	16000086	0.000980392
tr|E9PM09|E9PM09_HUMAN	FALSE	43720944	49818728	80874400	33532908	63117912	37292988	0.00160128
tr|B8A6G2|B8A6G2_HUMAN;tr|A6QRI9|A6QRI9_HUMAN	FALSE	43980388	66043600	70309552	83284872	106303152	82369032	0.000980392
tr|C9JDH9|C9JDH9_HUMAN;sp|Q9Y6E0-2|STK24_HUMAN;sp|O00506-2|STK25_HUMAN;sp|Q9P289-2|STK26_HUMAN;sp|Q9P289|STK26_HUMAN;tr|C9J232|C9J232_HUMAN;tr|C9JCC0|C9JCC0_HUMAN;tr|H7C279|H7C279_HUMAN;tr|C9J6L2|C9J6L2_HUMAN;tr|H0Y630|H0Y630_HUMAN;sp|O00506-3|STK25_HUMAN;tr|Q8NBY1|Q8NBY1_HUMAN;tr|B4DR80|B4DR80_HUMAN;tr|B4E0Y9|B4E0Y9_HUMAN;sp|O00506|STK25_HUMAN;sp|Q9Y6E0|STK24_HUMAN;tr|Q5JV98|Q5JV98_HUMAN	FALSE	6.93949e+06	5.25645e+06	6.05303e+06	5.27534e+06	7244765	5.21373e+06	0.00160128
tr|A0A2U3TZH3|A0A2U3TZH3_HUMAN;sp|Q05639|EF1A2_HUMAN	FALSE	1667665920	1219340288	1512429184	1355420672	1718003712	1347745024	0
tr|H0YE58|H0YE58_HUMAN;tr|H0YE72|H0YE72_HUMAN;tr|E9PQC9|E9PQC9_HUMAN	FALSE	76421776	29487992	37151424	36314516	42719948	31242734	0
tr|C9JNW5|C9JNW5_HUMAN;tr|C9JXB8|C9JXB8_HUMAN;sp|P83731|RL24_HUMAN	FALSE	54774448	35491084	46663272	40178936	47844336	37557728	0
sp|P05387|RLA2_HUMAN	FALSE	317535968	269152416	288981120	254160352	343607072	271664448	0
sp|P36542|ATPG_HUMAN;sp|P36542-2|ATPG_HUMAN	FALSE	15223053	11991222	10771664	8090006	10988052	8355410	0
tr|H0YJW3|H0YJW3_HUMAN;tr|H7C5W8|H7C5W8_HUMAN;tr|H0YJ11|H0YJ11_HUMAN	FALSE	12105777	13595566	14041089	131961640	10121430	103488936	0.00160128
tr|I3L3P7|I3L3P7_HUMAN;sp|P62244|RS15A_HUMAN	FALSE	75384008	56078436	64998272	53745688	74944064	51738956	0.000980392
sp|P62847-2|RS24_HUMAN;sp|P62847-3|RS24_HUMAN;sp|P62847-4|RS24_HUMAN;tr|A0A2R8Y849|A0A2R8Y849_HUMAN;tr|A0A2R8YD14|A0A2R8YD14_HUMAN;tr|E7ETK0|E7ETK0_HUMAN;tr|A0A087WUS0|A0A087WUS0_HUMAN;sp|P62847|RS24_HUMAN	FALSE	25916758	27844374	30678972	28148484	36379800	24403966	0.000980392
tr|G3XAN0|G3XAN0_HUMAN	FALSE	90909112	121159976	144398032	105404312	159907616	123025424	0.000980392
tr|E9PI39|E9PI39_HUMAN;tr|E9PPR1|E9PPR1_HUMAN;tr|E9PL12|E9PL12_HUMAN;tr|E9PQ49|E9PQ49_HUMAN	FALSE	27927678	40404120	47980348	40480176	53969336	43699272	0.000980392
sp|Q92841-2|DDX17_HUMAN;sp|Q92841-1|DDX17_HUMAN;sp|Q92841-3|DDX17_HUMAN;tr|A0A1X7SBZ2|A0A1X7SBZ2_HUMAN;sp|Q92841|DDX17_HUMAN;tr|A0A1W2PQ51|A0A1W2PQ51_HUMAN	FALSE	112878760	72844408	96834616	82768488	103824960	84763024	0
tr|K7EPL2|K7EPL2_HUMAN;sp|Q9UBT2|SAE2_HUMAN	FALSE	15248453	9438352	18095726	16173428	19147624	16108420	0.00160128
tr|H7C4L9|H7C4L9_HUMAN;sp|P54709-2|AT1B3_HUMAN;tr|C9JA36|C9JA36_HUMAN	FALSE	16303130	9561648	14321139	11458130	17609258	13400204	0
tr|H3BQB1|H3BQB1_HUMAN;sp|P07741-2|APT_HUMAN;tr|H3BQF1|H3BQF1_HUMAN;sp|P07741|APT_HUMAN;tr|H3BQZ9|H3BQZ9_HUMAN;tr|H3BSW3|H3BSW3_HUMAN	FALSE	34775000	23015556	24946036	21021224	21946734	25800616	0
sp|P29692-3|EF1D_HUMAN	FALSE	66407704	45557372	53225376	43075272	59611724	45795444	0.000980392
tr|C9J4N6|C9J4N6_HUMAN	FALSE	9711123	5909969	7.66379e+06	1.68389e+06	6615166	3.97604e+06	0
tr|H7C342|H7C342_HUMAN;sp|P30046|DOPD_HUMAN;tr|J3KQ18|J3KQ18_HUMAN	FALSE	34159968	25365602	28338246	23862158	33847152	23464380	0.000980392
tr|Q5SQY0|Q5SQY0_HUMAN;tr|A0A075B736|A0A075B736_HUMAN	FALSE	252445632	375637728	503476704	424496256	561837376	484954080	0
tr|E9PGM1|E9PGM1_HUMAN;sp|Q04637-5|IF4G1_HUMAN;sp|Q04637-6|IF4G1_HUMAN;sp|Q04637-7|IF4G1_HUMAN;sp|Q04637-8|IF4G1_HUMAN;tr|E7EUU4|E7EUU4_HUMAN;sp|Q04637-4|IF4G1_HUMAN;sp|Q04637|IF4G1_HUMAN;tr|E7EX73|E7EX73_HUMAN;sp|Q04637-3|IF4G1_HUMAN;sp|Q04637-9|IF4G1_HUMAN	FALSE	23060230	18554358	22311618	19232666	27258094	18629810	0
tr|A0A0D9SGF6|A0A0D9SGF6_HUMAN;sp|Q13813-2|SPTN1_HUMAN;sp|Q13813-3|SPTN1_HUMAN;tr|A0A0D9SF54|A0A0D9SF54_HUMAN;sp|Q13813|SPTN1_HUMAN	FALSE	22321098	19530274	18343566	20109968	31017236	18724632	0
tr|M0R2L9|M0R2L9_HUMAN;tr|M0R140|M0R140_HUMAN;tr|M0QXK4|M0QXK4_HUMAN;tr|M0QYF7|M0QYF7_HUMAN	FALSE	100695920	94350624	79365152	70082096	99820048	71731040	0
sp|O75874|IDHC_HUMAN	FALSE	11055274	10716181	11008814	9017264	13146239	14429941	0.00160128
sp|Q9NVI7|ATD3A_HUMAN;sp|Q5T9A4|ATD3B_HUMAN;sp|Q5T2N8|ATD3C_HUMAN;sp|Q5T9A4-3|ATD3B_HUMAN;sp|Q9NVI7-2|ATD3A_HUMAN;tr|H0Y2W2|H0Y2W2_HUMAN;sp|Q9NVI7-3|ATD3A_HUMAN	FALSE	33127670	1406674	39975828	1.06189e+06	36403860	3079289	0.00316957
sp|Q9Y281|COF2_HUMAN;sp|Q9Y281-3|COF2_HUMAN	FALSE	449485248	324265632	379374144	304072800	431808480	322079520	0
sp|P35232-2|PHB_HUMAN	FALSE	28083284	15729311	18514842	15299953	19344376	13700939	0
tr|E9PS50|E9PS50_HUMAN	FALSE	72425656	51223156	53296496	46525752	65881840	49285496	0
sp|P0DP25|CALM3_HUMAN;tr|G3V479|G3V479_HUMAN;tr|E7EMB3|E7EMB3_HUMAN;sp|P0DP24|CALM2_HUMAN;tr|E7ETZ0|E7ETZ0_HUMAN;sp|P0DP23|CALM1_HUMAN;tr|F8WBR5|F8WBR5_HUMAN;tr|M0QZ52|M0QZ52_HUMAN;tr|H0Y7A7|H0Y7A7_HUMAN	FALSE	49774576	35952676	46588008	41939704	59349936	40976664	0
sp|Q07955-2|SRSF1_HUMAN;sp|Q07955-3|SRSF1_HUMAN;sp|Q07955|SRSF1_HUMAN;tr|J3KTL2|J3KTL2_HUMAN	FALSE	77766712	50827316	67426720	60110888	73136120	61305644	0.00160128
tr|F8W1U3|F8W1U3_HUMAN	FALSE	78794864	63106804	73531920	62147716	83427144	65188212	0.000980392
tr|H0YIZ0|H0YIZ0_HUMAN	FALSE	43367584	30892050	35792300	29860684	38318860	32208562	0
sp|P60900|PSA6_HUMAN;tr|G3V3I1|G3V3I1_HUMAN;tr|G3V3U4|G3V3U4_HUMAN;tr|G3V5Z7|G3V5Z7_HUMAN;tr|G3V295|G3V295_HUMAN	FALSE	20200758	9106919	13696244	9588865	14825027	11873221	0.000980392
tr|F8VTQ5|F8VTQ5_HUMAN	FALSE	75925464	56376808	66183604	62369084	74698736	60124816	0
tr|G3V1B3|G3V1B3_HUMAN;tr|M0R181|M0R181_HUMAN	FALSE	30705896	43515100	45980876	38770164	57539932	44341044	0.000980392
tr|F5GXS2|F5GXS2_HUMAN;sp|O43707-3|ACTN4_HUMAN	FALSE	34058600	34537160	40217072	55703432	83627696	66938976	0
sp|Q71UI9-4|H2AV_HUMAN;sp|Q71UI9-3|H2AV_HUMAN;sp|Q71UI9|H2AV_HUMAN;sp|P0C0S5|H2AZ_HUMAN	FALSE	16610459	41588960	50967908	28115350	57822604	48135140	0.000980392
sp|P62753|RS6_HUMAN;tr|A2A3R5|A2A3R5_HUMAN	FALSE	41236888	27172448	33755676	27450106	38194428	31139954	0.000980392
sp|P07195|LDHB_HUMAN	FALSE	1514074752	1141789056	1327062016	1109393792	1504891264	1129198976	0
tr|G5E9G0|G5E9G0_HUMAN	FALSE	131332728	107781688	134531728	111208976	145478240	109435168	0.000980392
tr|H7BXG7|H7BXG7_HUMAN;sp|O94979-2|SC31A_HUMAN;sp|O94979-9|SC31A_HUMAN;sp|O94979-8|SC31A_HUMAN;sp|O94979|SC31A_HUMAN;sp|O94979-6|SC31A_HUMAN;tr|D6REX3|D6REX3_HUMAN;sp|O94979-3|SC31A_HUMAN;sp|O94979-10|SC31A_HUMAN;sp|O94979-4|SC31A_HUMAN;tr|D6RHZ5|D6RHZ5_HUMAN;tr|H0YAB3|H0YAB3_HUMAN;sp|O94979-7|SC31A_HUMAN	FALSE	1.80055e+06	4.65634e+06	5.49793e+06	3.75157e+06	6.44709e+06	4430957	0.00160128
sp|P04792|HSPB1_HUMAN	FALSE	69640704	73424304	81899400	69391984	71819864	61479036	0
tr|A0A140T9B3|A0A140T9B3_HUMAN;sp|P30508|1C12_HUMAN;sp|Q29963|1C06_HUMAN;tr|A0A0G2JIF0|A0A0G2JIF0_HUMAN;sp|P30510|1C14_HUMAN;sp|Q9TNN7|1C05_HUMAN;tr|A0A1W2PS56|A0A1W2PS56_HUMAN;tr|A0A1W2PRX1|A0A1W2PRX1_HUMAN;tr|A0A140T962|A0A140T962_HUMAN;sp|Q07000|1C15_HUMAN;tr|A0A1W2PR11|A0A1W2PR11_HUMAN;tr|A0A140T9J9|A0A140T9J9_HUMAN;tr|A0A0G2JH50|A0A0G2JH50_HUMAN;sp|P30504|1C04_HUMAN;tr|A2BF26|A2BF26_HUMAN;sp…	FALSE	3692064	5.20134e+06	5.86448e+06	18593164	22431302	19743286	0.00160128
sp|P0DPH7|TBA3C_HUMAN;sp|P0DPH8|TBA3D_HUMAN	FALSE	23230764	31029752	33871112	30910248	38426036	27975870	0.000980392
tr|A0A3B3ITT5|A0A3B3ITT5_HUMAN;sp|P47914|RL29_HUMAN	FALSE	187127408	204387728	252958352	194200912	293467872	225568208	0
tr|Q32Q12|Q32Q12_HUMAN;sp|P22392-2|NDKB_HUMAN	FALSE	95138232	80984976	101671904	80967240	120812576	92328384	0
sp|Q9HB71|CYBP_HUMAN;sp|Q9HB71-3|CYBP_HUMAN	FALSE	422019712	330566208	450287584	363799616	567076736	417221248	0
tr|E5RJR5|E5RJR5_HUMAN;sp|P63208|SKP1_HUMAN;tr|E7ERH2|E7ERH2_HUMAN;tr|F8W8N3|F8W8N3_HUMAN;sp|P63208-2|SKP1_HUMAN	FALSE	18932604	10921549	16677226	11421327	16088215	13233257	0
sp|P42677|RS27_HUMAN;tr|H0YMV8|H0YMV8_HUMAN;sp|Q71UM5|RS27L_HUMAN	FALSE	59171632	50829452	52551716	67247024	87867496	63237512	0
tr|B0YJC5|B0YJC5_HUMAN	FALSE	380650816	288734944	326762080	283188384	365618176	284598464	0
tr|U3KPZ0|U3KPZ0_HUMAN	FALSE	4.80175e+06	6.8793e+06	7.37757e+06	5.2e+06	8694857	3819562	0
tr|E7EVA0|E7EVA0_HUMAN;sp|P27816-2|MAP4_HUMAN;sp|P27816-6|MAP4_HUMAN;sp|P27816|MAP4_HUMAN	FALSE	35310208	9983457	21399206	17886572	10761604	15910053	0.000980392
sp|Q08945|SSRP1_HUMAN	FALSE	5.21619e+06	4.3824e+06	6591757	5.52933e+06	5379841	5.57748e+06	0.000980392
tr|G3V0E5|G3V0E5_HUMAN;sp|P02786|TFR1_HUMAN	FALSE	16828006	10735107	14215269	10686936	15370555	12632113	0
sp|P28074-3|PSB5_HUMAN	FALSE	7954456	12118019	18614996	10978463	22000436	21280144	0
tr|D6RIE3|D6RIE3_HUMAN;tr|H0UI06|H0UI06_HUMAN;sp|P14406|CX7A2_HUMAN;tr|D6RGV5|D6RGV5_HUMAN	FALSE	23837254	18048154	22491808	16922764	21533042	15182259	0
sp|P43686|PRS6B_HUMAN;sp|P43686-2|PRS6B_HUMAN	FALSE	11005739	17076170	20532010	14917557	22412570	17406784	0.000980392
sp|P46776|RL27A_HUMAN;tr|E9PLL6|E9PLL6_HUMAN	FALSE	16302371	18965702	26865186	18500064	29179952	24067464	0.000980392
sp|P62258|1433E_HUMAN	FALSE	27378052	33460724	32414172	27809754	35756980	23074996	0.000980392
sp|P36871-3|PGM1_HUMAN;sp|P36871-2|PGM1_HUMAN	FALSE	38648256	26511790	34506860	27108584	41156400	29864486	0
tr|C9JYS8|C9JYS8_HUMAN	FALSE	19042526	30667118	34298352	33939364	46042680	30954942	0
tr|F8VNW4|F8VNW4_HUMAN;sp|Q13765|NACA_HUMAN;sp|E9PAV3-2|NACAM_HUMAN;tr|F8W1N5|F8W1N5_HUMAN;sp|E9PAV3|NACAM_HUMAN;tr|F8W0W4|F8W0W4_HUMAN;tr|H0YHX9|H0YHX9_HUMAN;tr|F8VZJ2|F8VZJ2_HUMAN	FALSE	96943056	68496248	86378616	69103808	93168896	72623456	0
tr|E5RHG6|E5RHG6_HUMAN;tr|E5RJD8|E5RJD8_HUMAN;sp|O75347|TBCA_HUMAN;tr|E5RIW3|E5RIW3_HUMAN	FALSE	144336208	89620832	117142264	104463040	141459760	101110272	0
sp|P28074|PSB5_HUMAN	FALSE	2.21753e+06	3021760	4.5924e+06	5425434	5.08238e+06	3.34139e+06	0.000980392
sp|Q9NP58-4|ABCB6_HUMAN;sp|Q9NP58|ABCB6_HUMAN;tr|H7BXK9|H7BXK9_HUMAN	FALSE	27210806	21763166	25270486	19673472	28805770	20989856	0.00160128
tr|Q5STU3|Q5STU3_HUMAN	FALSE	12422130	20170954	23212612	14276624	26979976	18890256	0.000980392
tr|A0A1X7SBS1|A0A1X7SBS1_HUMAN	FALSE	41821384	28950010	41982316	28127290	42829712	33974036	0
sp|P08238|HS90B_HUMAN	FALSE	3448839424	2905950464	3383411968	3015576320	3906502912	3000825344	0
sp|P43307|SSRA_HUMAN;sp|P43307-2|SSRA_HUMAN;tr|C9J5W0|C9J5W0_HUMAN;tr|C9J3L8|C9J3L8_HUMAN;tr|A0A3B3IRT8|A0A3B3IRT8_HUMAN;tr|E9PAL7|E9PAL7_HUMAN;tr|C9IZQ1|C9IZQ1_HUMAN	FALSE	22764782	16823276	23362410	15491415	21694226	21830040	0.000980392
sp|P46779|RL28_HUMAN;sp|P46779-3|RL28_HUMAN;tr|H0YKD8|H0YKD8_HUMAN;sp|P46779-2|RL28_HUMAN	FALSE	73522816	50925464	64094496	55944516	72947096	56404272	0
sp|P37837|TALDO_HUMAN;tr|F2Z393|F2Z393_HUMAN	FALSE	22006354	13001514	18158896	14157177	19149554	16900420	0
sp|Q14152|EIF3A_HUMAN;sp|Q14152-2|EIF3A_HUMAN	FALSE	55794448	60264344	45981292	27604008	34356736	26791594	0
sp|P37108|SRP14_HUMAN;tr|H0YLW0|H0YLW0_HUMAN	FALSE	29467690	25302090	30391208	19016086	29183426	26542890	0.00988593
tr|J3QLR1|J3QLR1_HUMAN;tr|H7C4G5|H7C4G5_HUMAN	FALSE	6248415	11033420	13632307	9464461	17001306	16101619	0.003885
tr|A0A0A0MSJ0|A0A0A0MSJ0_HUMAN;sp|Q86XP3|DDX42_HUMAN;sp|Q86XP3-2|DDX42_HUMAN	FALSE	0	0	888853	863977	1.10228e+06	814165	0.00160128
sp|P40926-2|MDHM_HUMAN	FALSE	108900440	138694544	165998528	137305520	209142816	150116000	0
sp|P62633-5|CNBP_HUMAN;sp|P62633-3|CNBP_HUMAN;sp|P62633-8|CNBP_HUMAN;sp|P62633-2|CNBP_HUMAN;sp|P62633-7|CNBP_HUMAN;sp|P62633|CNBP_HUMAN;sp|P62633-4|CNBP_HUMAN;sp|P62633-6|CNBP_HUMAN	FALSE	3.0247e+06	9844164	8950662	13770729	19005612	14565776	0
tr|J3KP15|J3KP15_HUMAN;sp|Q01130-2|SRSF2_HUMAN;sp|Q01130|SRSF2_HUMAN;tr|J3QL05|J3QL05_HUMAN	FALSE	35066336	30445066	34765436	35365692	40866956	34314940	0.00160128
sp|P31150|GDIA_HUMAN;tr|Q5SX87|Q5SX87_HUMAN	FALSE	16438887	11185629	15273098	13016543	16454719	11389918	0.00160128
sp|O75526|RMXL2_HUMAN	FALSE	25477394	17587114	18386810	17188528	27115512	20561160	0
sp|P34897-2|GLYM_HUMAN	FALSE	4.33614e+06	2.60859e+06	3.55812e+06	3.83935e+06	4.08017e+06	3.53906e+06	0.000980392
sp|Q05519-2|SRS11_HUMAN;sp|Q05519|SRS11_HUMAN;tr|Q5T760|Q5T760_HUMAN	FALSE	7.96349e+06	5710063	6.57962e+06	6308537	7930200	6.0406e+06	0
tr|A0A0A0MR20|A0A0A0MR20_HUMAN;sp|Q9C0A0|CNTP4_HUMAN;tr|A0A087WTA1|A0A087WTA1_HUMAN;tr|E9PDN6|E9PDN6_HUMAN;tr|F5H107|F5H107_HUMAN;sp|Q9C0A0-2|CNTP4_HUMAN	FALSE	105144832	84598664	99890800	86379640	114326360	83518776	0.00160128
sp|P13073|COX41_HUMAN	FALSE	37971488	35291052	38269264	34366532	41482412	31602284	0.000980392
sp|P30456|1A43_HUMAN;tr|A0A1W2PPF8|A0A1W2PPF8_HUMAN;tr|A0A0G2JPD3|A0A0G2JPD3_HUMAN;tr|A0A140T8Y4|A0A140T8Y4_HUMAN;sp|P18462|1A25_HUMAN;tr|A0A140T8W8|A0A140T8W8_HUMAN;tr|A0A1W2PR61|A0A1W2PR61_HUMAN;sp|P30457|1A66_HUMAN;sp|P30450|1A26_HUMAN	FALSE	307362	2.45103e+06	3.11203e+06	1.71377e+06	3335810	2888979	0.00160128
tr|F5H0C8|F5H0C8_HUMAN;sp|P09104-2|ENOG_HUMAN;sp|P09104|ENOG_HUMAN;tr|F5H1C3|F5H1C3_HUMAN	FALSE	412096608	320141440	376917760	350953568	429229760	350591744	0
tr|M0R0I5|M0R0I5_HUMAN	FALSE	6.85366e+06	10509948	10153029	9243220	10229074	7.63007e+06	0.00160128
sp|P31949|S10AB_HUMAN	FALSE	48914752	39329808	43786168	34665496	42235068	32848676	0
sp|P0CL80-2|GG12F_HUMAN;sp|A1L429|GG12C_HUMAN;sp|Q13065|GAGE1_HUMAN;sp|O76087|GAGE7_HUMAN;sp|P0CL80|GG12F_HUMAN;sp|P0CL81|GG12G_HUMAN;sp|A6NDE8|GG12H_HUMAN;sp|P0CL82|GG12I_HUMAN;sp|Q13068|GAGE4_HUMAN;sp|A6NER3|GG12J_HUMAN;sp|Q4V321|GAG13_HUMAN;sp|Q13070|GAGE6_HUMAN;sp|Q13069|GAGE5_HUMAN;sp|Q4V326|GAG2E_HUMAN	FALSE	21154708	17078156	19056072	17406048	24801242	16110374	0.003885
tr|A0A2R8Y798|A0A2R8Y798_HUMAN;tr|A0A2R8YEG5|A0A2R8YEG5_HUMAN	FALSE	43622796	34298092	41158472	33624580	42256284	33138850	0.000980392
sp|P13797|PLST_HUMAN;sp|P13797-2|PLST_HUMAN;sp|P13797-3|PLST_HUMAN;tr|A0A0A0MSQ0|A0A0A0MSQ0_HUMAN	FALSE	37813928	22781814	31490798	23920162	30522908	24572638	0
tr|S4R349|S4R349_HUMAN;tr|S4R3C2|S4R3C2_HUMAN	FALSE	42061604	39860516	56453976	39737604	22011336	16440229	0.00160128
sp|O75534|CSDE1_HUMAN;sp|O75534-2|CSDE1_HUMAN;tr|E9PLT0|E9PLT0_HUMAN;sp|O75534-3|CSDE1_HUMAN;sp|O75534-4|CSDE1_HUMAN	FALSE	11367890	8424154	11211465	9007806	13939811	10770073	0
tr|Q5T0D2|Q5T0D2_HUMAN;sp|P30085|KCY_HUMAN;sp|P30085-2|KCY_HUMAN	FALSE	8518322	5.75165e+06	9568559	7.69631e+06	9146804	6150139	0.00160128
sp|Q12906-3|ILF3_HUMAN;sp|Q12906-4|ILF3_HUMAN;sp|Q12906-2|ILF3_HUMAN;sp|Q12906-5|ILF3_HUMAN;sp|Q12906-7|ILF3_HUMAN;sp|Q12906|ILF3_HUMAN;sp|Q12906-6|ILF3_HUMAN	FALSE	88975392	74108144	96520880	84573760	114887160	81499592	0
sp|O43707-2|ACTN4_HUMAN	FALSE	13798632	17842202	20446164	13494131	21299382	18264770	0
tr|H7C422|H7C422_HUMAN	FALSE	3.78853e+06	3.97291e+06	5.02684e+06	3.54184e+06	6.20638e+06	4766991	0.00160128
tr|F8VW21|F8VW21_HUMAN	FALSE	61896684	53103380	70084136	72933744	84875008	62050684	0
sp|P98179|RBM3_HUMAN	FALSE	13174709	4.20073e+06	3.66686e+06	2.72449e+06	4135105	3.55431e+06	0.00160128
sp|O75396|SC22B_HUMAN;tr|A0A087X1A9|A0A087X1A9_HUMAN	FALSE	11867926	11730300	6.18318e+06	16350145	8575082	12698487	0.000980392
sp|P62820-2|RAB1A_HUMAN;sp|Q92928|RAB1C_HUMAN;tr|E9PLD0|E9PLD0_HUMAN	FALSE	51149012	33114516	43280044	35074576	45932976	34203300	0
tr|D6RAU2|D6RAU2_HUMAN;tr|E9PD14|E9PD14_HUMAN	FALSE	141716256	109612040	138138272	114620232	157951552	129492560	0.000980392
sp|Q08257-2|QOR_HUMAN;sp|Q08257-3|QOR_HUMAN;sp|Q08257|QOR_HUMAN	FALSE	4.39657e+06	12271795	15293674	9840637	15271707	12672523	0
tr|B4E1S2|B4E1S2_HUMAN;tr|Q6P452|Q6P452_HUMAN;sp|P09525-2|ANXA4_HUMAN;sp|P09525|ANXA4_HUMAN	FALSE	4605167	3803233	3.71062e+06	7526928	9591878	10152991	0.00160128
tr|A0A087WWX0|A0A087WWX0_HUMAN;sp|P19388|RPAB1_HUMAN;tr|A0A087WVZ9|A0A087WVZ9_HUMAN	FALSE	14345745	10731928	14044192	11794167	13896519	11785398	0.000980392
sp|P0DMV8-2|HS71A_HUMAN	FALSE	13426636	9262186	12713777	17318490	21073770	15962575	0
tr|B0AZS6|B0AZS6_HUMAN	FALSE	47322444	37064124	42180700	37800660	51460508	39534084	0.000980392
tr|H0YF32|H0YF32_HUMAN	FALSE	52855852	41690448	47045460	41248732	52452836	41976696	0
sp|Q01105|SET_HUMAN;sp|Q01105-3|SET_HUMAN;sp|P0DME0|SETLP_HUMAN;sp|Q01105-2|SET_HUMAN;tr|A0A087X027|A0A087X027_HUMAN;sp|Q01105-4|SET_HUMAN;tr|A0A0C4DFV9|A0A0C4DFV9_HUMAN	FALSE	144095472	100577256	114991120	103267144	159833744	133858552	0
sp|Q07666-3|KHDR1_HUMAN	FALSE	1383372	2.13613e+06	2.47525e+06	2.38722e+06	3.0763e+06	2.21362e+06	0.00160128
tr|A0A0C4DG89|A0A0C4DG89_HUMAN;sp|Q7L014|DDX46_HUMAN	FALSE	4642003	3.28234e+06	4.11687e+06	3.67037e+06	4.33287e+06	2849713	0.000980392
tr|F5H0C5|F5H0C5_HUMAN;tr|F5H2D2|F5H2D2_HUMAN	FALSE	6971682	15112522	17701706	8.31491e+06	19985160	14447803	0.00160128
sp|P07355|ANXA2_HUMAN;sp|P07355-2|ANXA2_HUMAN;tr|H0YN42|H0YN42_HUMAN	FALSE	28470334	20929122	24148020	23684358	32135774	24955194	0.000980392
tr|A0A0J9YXV4|A0A0J9YXV4_HUMAN;tr|H3BSH7|H3BSH7_HUMAN;sp|Q969X6|UTP4_HUMAN;sp|Q969X6-2|UTP4_HUMAN;tr|A0A0J9YWM9|A0A0J9YWM9_HUMAN;sp|Q969X6-3|UTP4_HUMAN;tr|A0A0J9YWK2|A0A0J9YWK2_HUMAN	FALSE	997144	2194865	2.45226e+06	1.05709e+06	2514237	2.06161e+06	0.000980392
tr|B4DSU6|B4DSU6_HUMAN;tr|G3V5X6|G3V5X6_HUMAN;tr|G3V251|G3V251_HUMAN;tr|G3V3K6|G3V3K6_HUMAN	FALSE	14155387	7992327	13933906	13231006	15751009	11023437	0
tr|A0A2R8Y7H4|A0A2R8Y7H4_HUMAN;sp|P11908|PRPS2_HUMAN;sp|P21108|PRPS3_HUMAN;tr|B1ALA9|B1ALA9_HUMAN;sp|P60891|PRPS1_HUMAN;tr|A0A0B4J207|A0A0B4J207_HUMAN;sp|P11908-2|PRPS2_HUMAN	FALSE	21227368	21246498	27087734	23074442	28282094	21326060	0.000980392
sp|P46777|RL5_HUMAN;tr|A0A2R8Y6J3|A0A2R8Y6J3_HUMAN	FALSE	281173376	201925792	220927936	192035296	258748240	200201296	0
tr|K7ERI7|K7ERI7_HUMAN;tr|K7EMH1|K7EMH1_HUMAN;tr|K7ELC4|K7ELC4_HUMAN;tr|K7EP65|K7EP65_HUMAN;tr|K7EKS7|K7EKS7_HUMAN	FALSE	54180212	34636400	44657160	40537712	53282776	38243108	0.000980392
sp|P52565|GDIR1_HUMAN;tr|J3KTF8|J3KTF8_HUMAN;tr|J3QQX2|J3QQX2_HUMAN	FALSE	13325834	9469192	13269415	14437356	19670764	11701703	0
tr|K7ENA8|K7ENA8_HUMAN;sp|O75821|EIF3G_HUMAN;tr|K7EL20|K7EL20_HUMAN;tr|K7ER90|K7ER90_HUMAN	FALSE	6.98464e+06	8.1308e+06	10770398	7351786	10171073	7.99129e+06	0.000980392
sp|P17844|DDX5_HUMAN;sp|P17844-2|DDX5_HUMAN;tr|J3KTA4|J3KTA4_HUMAN	FALSE	50812608	39765272	49276308	43199152	63597940	51876168	0.000980392
sp|P05141|ADT2_HUMAN	FALSE	231778064	199969264	244154304	209242160	262446544	215540576	0
sp|O00273-2|DFFA_HUMAN;sp|O00273|DFFA_HUMAN	FALSE	2.70341e+06	4289234	5946487	3.98411e+06	6544081	4.56018e+06	0.00160128
tr|M0QY37|M0QY37_HUMAN;tr|M0R0X0|M0R0X0_HUMAN;tr|M0QX14|M0QX14_HUMAN	FALSE	30916116	100847904	122519440	106677192	128964800	104284512	0.000980392
tr|F8WE11|F8WE11_HUMAN;tr|J3QQP0|J3QQP0_HUMAN;tr|E9PBH4|E9PBH4_HUMAN	FALSE	98151400	70411848	81576896	82332464	106801120	80529912	0.000980392
tr|F8VVM2|F8VVM2_HUMAN	FALSE	67898960	58909348	80031712	84815184	97630912	82572504	0.000980392
sp|P55769|NH2L1_HUMAN;tr|A0A3B3IRU2|A0A3B3IRU2_HUMAN;tr|A0A3B3IUA2|A0A3B3IUA2_HUMAN;tr|B1AHD1|B1AHD1_HUMAN	FALSE	24486870	28769954	22130204	26783250	31283602	26675656	0.000980392
tr|F8VVB9|F8VVB9_HUMAN	FALSE	68174136	64514016	72470536	71667256	79935320	68952040	0
tr|A0A0G2JQH2|A0A0G2JQH2_HUMAN;tr|Q5GGW2|Q5GGW2_HUMAN	FALSE	101407136	76486936	90777504	75664080	107455552	76122416	0.000980392
tr|S4R359|S4R359_HUMAN	FALSE	183573040	131418704	148086432	130532192	177772224	131531456	0
tr|E9PP50|E9PP50_HUMAN	FALSE	33144926	59056468	64417984	60890788	105251984	75557008	0
tr|A0A286YF22|A0A286YF22_HUMAN;tr|A0A2C9F2M7|A0A2C9F2M7_HUMAN;sp|O43175|SERA_HUMAN	FALSE	350440736	266936672	306391936	267177824	358865536	262275840	0
tr|A0A0A0MSX9|A0A0A0MSX9_HUMAN;tr|Q5TCD1|Q5TCD1_HUMAN;sp|P41252|SYIC_HUMAN	FALSE	2.91809e+06	5.13219e+06	7.67004e+06	4.69713e+06	7082409	5.75301e+06	0.00160128
sp|P54819-5|KAD2_HUMAN;tr|F8VY04|F8VY04_HUMAN;sp|P54819-2|KAD2_HUMAN;tr|F8W1A4|F8W1A4_HUMAN;sp|P54819|KAD2_HUMAN	FALSE	37308976	35055408	40447948	34774248	45380520	36122916	0.000980392
tr|A0A087WX41|A0A087WX41_HUMAN;sp|P53675-2|CLH2_HUMAN;sp|P53675|CLH2_HUMAN	FALSE	24513144	15435228	19955646	17142222	24058330	17153322	0
sp|P06748|NPM_HUMAN;sp|P06748-2|NPM_HUMAN	FALSE	309248800	246008960	275224704	240900768	323666944	243145136	0
sp|P25205|MCM3_HUMAN;tr|J3KQ69|J3KQ69_HUMAN;sp|P25205-2|MCM3_HUMAN	FALSE	18720444	12528482	15483769	14225176	29257772	14869064	0.00160128
tr|A0A0C4DGH5|A0A0C4DGH5_HUMAN;sp|Q86VP6-2|CAND1_HUMAN;sp|Q86VP6|CAND1_HUMAN	FALSE	42035092	40601420	46916592	18259646	23694866	17092644	0
sp|P30041|PRDX6_HUMAN	FALSE	679224576	547537536	626126976	550723904	716363008	526862176	0
sp|O60888|CUTA_HUMAN;sp|O60888-2|CUTA_HUMAN;sp|O60888-3|CUTA_HUMAN;tr|C9IZG4|C9IZG4_HUMAN	FALSE	18555814	13917064	18099504	15054602	21214784	16512601	0.00160128
tr|M0QYT0|M0QYT0_HUMAN	FALSE	29403756	23652614	25201402	22177436	32389480	27289746	0
tr|E9PS65|E9PS65_HUMAN	FALSE	240541968	161253936	181200416	152800768	207780576	155806160	0
tr|D6R9I7|D6R9I7_HUMAN;tr|D6RD47|D6RD47_HUMAN;tr|D6RIX0|D6RIX0_HUMAN;tr|D6RDJ2|D6RDJ2_HUMAN	FALSE	93456168	113243496	139278480	101507248	162596720	118228816	0
sp|P52292|IMA1_HUMAN	FALSE	27373908	18541754	24644544	21757030	29942824	19991464	0.000980392
tr|E9PNW0|E9PNW0_HUMAN;tr|E9PS34|E9PS34_HUMAN;tr|E9PJJ2|E9PJJ2_HUMAN;tr|A8MXH2|A8MXH2_HUMAN;tr|C9JZI7|C9JZI7_HUMAN;tr|C9J6D1|C9J6D1_HUMAN;tr|E9PKT8|E9PKT8_HUMAN;sp|Q99733-2|NP1L4_HUMAN;tr|E9PNJ7|E9PNJ7_HUMAN;sp|Q99733|NP1L4_HUMAN	FALSE	28672892	35052224	44100232	32055522	52569712	41157168	0.000980392
tr|C9J5V9|C9J5V9_HUMAN	FALSE	55933192	42689540	54389332	58340128	57973528	50850900	0.000980392
sp|O75369|FLNB_HUMAN;sp|Q14315|FLNC_HUMAN;sp|O75369-4|FLNB_HUMAN;sp|O75369-8|FLNB_HUMAN;sp|Q14315-2|FLNC_HUMAN;sp|O75369-5|FLNB_HUMAN;sp|O75369-3|FLNB_HUMAN;sp|O75369-9|FLNB_HUMAN;sp|O75369-6|FLNB_HUMAN;sp|O75369-2|FLNB_HUMAN	FALSE	5524267	10902289	12064164	13238786	15998921	13891468	0
tr|I3L0M9|I3L0M9_HUMAN;sp|Q15370|ELOB_HUMAN;tr|B8ZZU8|B8ZZU8_HUMAN;tr|A0A0B4J296|A0A0B4J296_HUMAN;sp|Q15370-2|ELOB_HUMAN	FALSE	15287991	10227618	12518359	10066704	12659553	9057846	0.00988593
tr|B7Z4E3|B7Z4E3_HUMAN;sp|P62899|RL31_HUMAN;sp|P62899-2|RL31_HUMAN;tr|C9JU56|C9JU56_HUMAN;tr|H7C2W9|H7C2W9_HUMAN;sp|P62899-3|RL31_HUMAN;tr|B7Z4C8|B7Z4C8_HUMAN	FALSE	80432512	62621068	78662952	76760648	90362448	70195832	0.00160128
tr|M0QXL5|M0QXL5_HUMAN;sp|A6NHQ2|FBLL1_HUMAN;tr|M0R0P1|M0R0P1_HUMAN;tr|M0R2Q4|M0R2Q4_HUMAN;sp|P22087|FBRL_HUMAN;tr|M0R299|M0R299_HUMAN	FALSE	19095994	23634562	22851050	28850118	29172204	17182084	0.000980392
tr|E9PIX6|E9PIX6_HUMAN;sp|Q99873|ANM1_HUMAN;tr|H0YDE4|H0YDE4_HUMAN;tr|E9PQ98|E9PQ98_HUMAN;tr|E9PNR9|E9PNR9_HUMAN;tr|E9PKG1|E9PKG1_HUMAN;sp|Q99873-2|ANM1_HUMAN;sp|Q99873-3|ANM1_HUMAN	FALSE	2.74778e+06	58220752	0	48426212	1.57717e+06	50952892	0.000980392
sp|P26639|SYTC_HUMAN	FALSE	23821134	18273620	22429632	22121952	28788650	20427956	0.000980392
tr|A0A0A0MRF8|A0A0A0MRF8_HUMAN;tr|J3QLC8|J3QLC8_HUMAN;sp|P18621-2|RL17_HUMAN	FALSE	43522572	33815572	35761920	28695254	37085708	28811444	0.000980392
sp|P55795|HNRH2_HUMAN	FALSE	52248152	76686736	90479440	67620176	92471656	66709944	0.00160128
sp|Q01813|PFKAP_HUMAN;sp|Q01813-2|PFKAP_HUMAN	FALSE	30524534	19488478	24639862	17342184	27586640	19315788	0
sp|Q00325-2|MPCP_HUMAN;sp|Q00325|MPCP_HUMAN	FALSE	131803808	78377480	95725352	83462384	124560264	88991552	0
sp|Q14141|SEPT6_HUMAN;tr|D6RDU5|D6RDU5_HUMAN;sp|Q9NVA2-2|SEP11_HUMAN;tr|B1AMS2|B1AMS2_HUMAN;tr|A0A087X142|A0A087X142_HUMAN;sp|Q92599-2|SEPT8_HUMAN;sp|Q92599-3|SEPT8_HUMAN;sp|Q92599|SEPT8_HUMAN;sp|Q14141-4|SEPT6_HUMAN;tr|F8W8I8|F8W8I8_HUMAN;tr|A6NMH6|A6NMH6_HUMAN;tr|D6RER5|D6RER5_HUMAN;sp|Q92599-4|SEPT8_HUMAN;tr|C9JV02|C9JV02_HUMAN;sp|Q9NVA2|SEP11_HUMAN;tr|D6RGI3|D6RGI3_HUMAN;tr|A6NFQ9|A6NFQ9_HUMA…	FALSE	22996664	16038708	20558034	16446544	23299132	18851816	0
tr|H7C367|H7C367_HUMAN	FALSE	94869888	69591360	72079920	75717960	87206216	52733460	0.000980392
sp|P12956-2|XRCC6_HUMAN;sp|P12956|XRCC6_HUMAN	FALSE	71636920	54427140	67497608	48916656	69602968	49919720	0
tr|A0A1W2PQM2|A0A1W2PQM2_HUMAN	FALSE	34801884	33539768	38247896	34971856	45322888	34507080	0
sp|Q15084-2|PDIA6_HUMAN;sp|Q15084-4|PDIA6_HUMAN;sp|Q15084|PDIA6_HUMAN;sp|Q15084-3|PDIA6_HUMAN;sp|Q15084-5|PDIA6_HUMAN	FALSE	119945184	103227216	117121976	107560736	140017040	110689752	0.000980392
sp|Q99877|H2B1N_HUMAN;sp|Q99880|H2B1L_HUMAN;sp|P62807|H2B1C_HUMAN;sp|Q5QNW6-2|H2B2F_HUMAN;sp|Q99879|H2B1M_HUMAN;tr|U3KQK0|U3KQK0_HUMAN;sp|O60814|H2B1K_HUMAN;sp|Q93079|H2B1H_HUMAN;sp|P58876|H2B1D_HUMAN;sp|Q5QNW6|H2B2F_HUMAN	FALSE	16905240	67445296	48303428	38565720	46703612	51386680	0.000980392
tr|M0R0G9|M0R0G9_HUMAN;sp|P08579|RU2B_HUMAN;tr|M0R2B8|M0R2B8_HUMAN;tr|M0R221|M0R221_HUMAN;sp|P09012|SNRPA_HUMAN;tr|M0R268|M0R268_HUMAN;tr|M0QZG7|M0QZG7_HUMAN;tr|M0QXK2|M0QXK2_HUMAN	FALSE	8456661	16374824	15835301	13948479	15335014	14438232	0
sp|P61289|PSME3_HUMAN;sp|P61289-2|PSME3_HUMAN;sp|P61289-3|PSME3_HUMAN;tr|A0A087WTV2|A0A087WTV2_HUMAN;tr|K9J957|K9J957_HUMAN	FALSE	7.04095e+06	5.6745e+06	7342344	4.88308e+06	9446598	8974566	0.000980392
tr|E7EPB3|E7EPB3_HUMAN;sp|P50914|RL14_HUMAN	FALSE	59406612	56112208	64849696	56662228	81912400	60613664	0.000980392
sp|B2RXH8|HNRC2_HUMAN;sp|O60812|HNRC1_HUMAN;sp|B7ZW38|HNRC3_HUMAN;tr|A0A0G2JNQ3|A0A0G2JNQ3_HUMAN;tr|A0A0G2JPF8|A0A0G2JPF8_HUMAN;sp|P0DMR1|HNRC4_HUMAN	FALSE	57951776	44844072	54712564	42609736	63399036	47187492	0
sp|P31948|STIP1_HUMAN;sp|P31948-2|STIP1_HUMAN;sp|P31948-3|STIP1_HUMAN	FALSE	109921592	76746472	88466520	82182432	103629584	84153488	0
tr|X6R6Z1|X6R6Z1_HUMAN	FALSE	33295186	23546032	29682838	22087074	28996480	23902282	0
sp|Q6S8J3|POTEE_HUMAN	FALSE	532706400	560158720	560033728	669211648	764343488	614815360	0
tr|Q5JRS1|Q5JRS1_HUMAN;tr|Q5JRS3|Q5JRS3_HUMAN	FALSE	43236824	35666144	33839952	26583732	36988924	28926922	0
tr|K7ENA0|K7ENA0_HUMAN	FALSE	66448984	87307008	105021504	73822336	136142688	95203328	0
tr|V9GZ17|V9GZ17_HUMAN	FALSE	387806720	297501440	368606432	331561696	466528288	350381056	0
tr|A0A2R8Y7K6|A0A2R8Y7K6_HUMAN;sp|P28340|DPOD1_HUMAN;tr|M0R2B7|M0R2B7_HUMAN;tr|M0QZR8|M0QZR8_HUMAN	FALSE	58112216	42632392	48111552	42772580	53369188	39338156	0.0091673
sp|Q15185|TEBP_HUMAN;sp|Q15185-4|TEBP_HUMAN;sp|Q15185-3|TEBP_HUMAN;tr|A0A087WYT3|A0A087WYT3_HUMAN	FALSE	78285256	78463416	71201528	82420952	106706504	77675816	0.000980392
sp|Q86T96-2|RN180_HUMAN;sp|Q86T96|RN180_HUMAN	FALSE	1.96572e+06	1.0471e+06	1.5025e+06	1.29877e+06	2.13694e+06	1.90034e+06	0.00988593
sp|P27824|CALX_HUMAN;sp|P27824-2|CALX_HUMAN	FALSE	65210660	43213116	53829328	44726044	59522752	46570736	0
sp|Q14697|GANAB_HUMAN;sp|Q14697-2|GANAB_HUMAN;tr|F5H6X6|F5H6X6_HUMAN	FALSE	14745649	13336725	12252226	11165899	13859733	16727328	0.000980392
sp|O60664-3|PLIN3_HUMAN;sp|O60664|PLIN3_HUMAN;sp|O60664-4|PLIN3_HUMAN	FALSE	2.04061e+06	3.5887e+06	4.0598e+06	4507780	5908494	3.87861e+06	0.00316957
sp|P32322-2|P5CR1_HUMAN;sp|P32322|P5CR1_HUMAN;tr|J3KQ22|J3KQ22_HUMAN;tr|J3QKT4|J3QKT4_HUMAN;sp|P32322-3|P5CR1_HUMAN;tr|J3QL24|J3QL24_HUMAN	FALSE	15603804	8667904	12564656	8855576	14834884	12302024	0.00160128
tr|C9JCQ4|C9JCQ4_HUMAN	FALSE	84624544	73302136	78287880	72713000	104485816	78007480	0
sp|P49588|SYAC_HUMAN;sp|P49588-2|SYAC_HUMAN	FALSE	123470408	96135888	104900336	82260352	116251760	92540360	0
sp|P30048|PRDX3_HUMAN;sp|P30048-2|PRDX3_HUMAN	FALSE	72573864	87580824	112851104	116371432	153623920	120342776	0.000980392
sp|P62854|RS26_HUMAN	FALSE	66678952	66609340	134720960	109763424	163203616	123396808	0
tr|M0QYR1|M0QYR1_HUMAN;sp|P08621-3|RU17_HUMAN;sp|P08621|RU17_HUMAN;sp|P08621-2|RU17_HUMAN	FALSE	23416282	16396168	24487186	18137766	31686106	21616076	0.00160128
tr|E9PRY8|E9PRY8_HUMAN;tr|E9PK01|E9PK01_HUMAN;sp|P29692-2|EF1D_HUMAN;sp|P29692|EF1D_HUMAN;tr|A0A087X1X7|A0A087X1X7_HUMAN	FALSE	61509516	45308480	53283928	44562200	59670120	48472028	0.000980392
tr|F8VYV2|F8VYV2_HUMAN	FALSE	10300419	23253578	27730382	17328090	31631620	24413988	0.000980392
tr|A0A140T936|A0A140T936_HUMAN;sp|P26640|SYVC_HUMAN	FALSE	10992346	16435634	19583514	18130838	22234516	18077448	0.000980392
sp|Q9UHD8-4|SEPT9_HUMAN;sp|Q9UHD8-9|SEPT9_HUMAN;sp|Q9UHD8|SEPT9_HUMAN;sp|Q9UHD8-3|SEPT9_HUMAN;sp|Q9UHD8-8|SEPT9_HUMAN;sp|Q9UHD8-7|SEPT9_HUMAN;sp|Q9UHD8-2|SEPT9_HUMAN;tr|K7EL40|K7EL40_HUMAN;sp|Q9UHD8-5|SEPT9_HUMAN;tr|K7EK18|K7EK18_HUMAN	FALSE	11239648	5381439	6322816	6034753	10884264	8039423	0.000980392
sp|P52597|HNRPF_HUMAN	FALSE	233526560	172292176	225695616	173496096	217059152	172594832	0.000980392
sp|Q9UN86|G3BP2_HUMAN;sp|Q9UN86-2|G3BP2_HUMAN	FALSE	22358618	16125249	18625982	16507837	18116378	13053974	0.000980392
tr|K7EJE8|K7EJE8_HUMAN;sp|P36776-2|LONM_HUMAN;sp|P36776-3|LONM_HUMAN;tr|K7EKE6|K7EKE6_HUMAN;sp|P36776|LONM_HUMAN	FALSE	34894844	24575730	35247860	28986694	41363924	32843974	0.000980392
sp|P34897-3|GLYM_HUMAN;sp|P34897|GLYM_HUMAN	FALSE	16058843	13188674	17852070	16416470	19666216	13560642	0.00160128
tr|A0A2R8YEM5|A0A2R8YEM5_HUMAN	FALSE	364248992	272159776	313089344	253329024	338601856	262716896	0
sp|P05023-3|AT1A1_HUMAN;sp|P05023-4|AT1A1_HUMAN;sp|P05023|AT1A1_HUMAN	FALSE	24714294	18316300	22449562	21140800	29329066	19179708	0
sp|P30044-3|PRDX5_HUMAN;sp|P30044-2|PRDX5_HUMAN;sp|P30044|PRDX5_HUMAN	FALSE	11714542	12885387	16168125	9964647	14018331	10120634	0
tr|E9PMM9|E9PMM9_HUMAN;tr|I3L404|I3L404_HUMAN;tr|E9PM36|E9PM36_HUMAN	FALSE	144605520	106342248	131783696	113018984	144624496	111307120	0
XXX_sp|P53778|MK12_HUMAN;XXX_sp|P53778-2|MK12_HUMAN;XXX_tr|A8MY48|A8MY48_HUMAN;XXX_sp|A0A0J9YXQ4|PMA6E_HUMAN	TRUE	18315674	11267010	13152127	12052813	13920735	9105171	0.00766871
sp|P55265-3|DSRAD_HUMAN;sp|P55265-4|DSRAD_HUMAN;tr|H0YCK3|H0YCK3_HUMAN;sp|P55265-2|DSRAD_HUMAN;tr|A0A3B3ISX1|A0A3B3ISX1_HUMAN;sp|P55265|DSRAD_HUMAN;tr|A0A3B3IRQ9|A0A3B3IRQ9_HUMAN;sp|P55265-5|DSRAD_HUMAN	FALSE	4255994	5.11948e+06	7447905	4.0636e+06	5899240	3.92371e+06	0.000980392
tr|J3QQT2|J3QQT2_HUMAN;sp|P18621-3|RL17_HUMAN;tr|A0A087WXM6|A0A087WXM6_HUMAN;tr|J3QS96|J3QS96_HUMAN;tr|J3KRB3|J3KRB3_HUMAN;tr|A0A087WY81|A0A087WY81_HUMAN;tr|A0A0A6YYL6|A0A0A6YYL6_HUMAN;tr|A0A087WWH0|A0A087WWH0_HUMAN;tr|J3KRX5|J3KRX5_HUMAN;sp|P18621|RL17_HUMAN	FALSE	40128112	31759716	39765964	31035054	42269812	33418526	0
XXX_sp|Q9NPC3|CIP1_HUMAN;XXX_tr|G3V5S3|G3V5S3_HUMAN	TRUE	23035762	14991697	16049089	15323855	16354760	10086203	0.003885
tr|H3BU13|H3BU13_HUMAN	FALSE	368868640	289507200	306672224	330591648	241927040	149366608	0.000980392
tr|M0R117|M0R117_HUMAN	FALSE	22214218	17845638	20432510	25247992	24911186	20579958	0
sp|Q13451|FKBP5_HUMAN	FALSE	4.93578e+06	3.48532e+06	4221528	2.40285e+06	5.81305e+06	4253401	0.00160128
tr|K7EJV9|K7EJV9_HUMAN;tr|A8MUS3|A8MUS3_HUMAN;tr|K7EMA7|K7EMA7_HUMAN;sp|P62750|RL23A_HUMAN;tr|H7BY10|H7BY10_HUMAN;tr|K7ERT8|K7ERT8_HUMAN	FALSE	293700480	203584928	247392912	199587712	293626688	214764928	0
tr|K7ENG2|K7ENG2_HUMAN;sp|P26368-2|U2AF2_HUMAN;sp|P26368|U2AF2_HUMAN	FALSE	1.84791e+06	2.21579e+06	2877740	2.14203e+06	2843449	2.94333e+06	0.00160128
sp|Q58FG1|HS904_HUMAN	FALSE	401955040	335433760	393605920	345146752	451314048	359156000	0
sp|O75947|ATP5H_HUMAN;sp|O75947-2|ATP5H_HUMAN;tr|F5H608|F5H608_HUMAN	FALSE	24504466	18516726	23636508	15895195	23234396	19085936	0
sp|Q9BTT0-3|AN32E_HUMAN;sp|Q9BTT0|AN32E_HUMAN;tr|E9PPH5|E9PPH5_HUMAN	FALSE	15431443	11321777	12724177	11183715	17223290	13673205	0.000980392
tr|A0A087X0X3|A0A087X0X3_HUMAN;sp|P52272-2|HNRPM_HUMAN;sp|P52272|HNRPM_HUMAN	FALSE	43533396	42488532	47118764	42020548	55820836	40130044	0
sp|Q15366|PCBP2_HUMAN;sp|Q15366-6|PCBP2_HUMAN;sp|Q15366-3|PCBP2_HUMAN;sp|Q15366-2|PCBP2_HUMAN	FALSE	21327608	15272042	17101656	16947952	18165864	14158393	0.00160128
sp|O00154-2|BACH_HUMAN;sp|O00154-3|BACH_HUMAN;sp|O00154-5|BACH_HUMAN;sp|O00154-6|BACH_HUMAN;sp|O00154|BACH_HUMAN;sp|O00154-4|BACH_HUMAN;tr|K7EKP8|K7EKP8_HUMAN;sp|O00154-7|BACH_HUMAN	FALSE	15018717	34855036	31274110	33405758	116932968	37293984	0.00160128
tr|A0A2R8Y738|A0A2R8Y738_HUMAN;tr|E7EX53|E7EX53_HUMAN;sp|P61313-2|RL15_HUMAN	FALSE	42639632	28574972	39098160	33931548	42683228	33207092	0.000980392
tr|F5H793|F5H793_HUMAN	FALSE	459612960	359455552	469023136	515246752	662544960	498851104	0
sp|Q15233-2|NONO_HUMAN;sp|Q15233|NONO_HUMAN	FALSE	53753356	41714108	52670012	51046652	63347492	56790228	0
tr|Q5T9B7|Q5T9B7_HUMAN;sp|Q9Y6K8|KAD5_HUMAN;sp|P00568|KAD1_HUMAN;tr|H0YID2|H0YID2_HUMAN;sp|Q9Y6K8-2|KAD5_HUMAN;sp|Q9Y6K8-3|KAD5_HUMAN	FALSE	3.46174e+06	1.4097e+06	4.0289e+06	0	2.12139e+06	1925212	0.00160128
tr|H0YKT8|H0YKT8_HUMAN	FALSE	29220682	21714752	28443376	22297474	27503370	18377918	0.000980392
sp|Q14103-3|HNRPD_HUMAN;sp|Q14103|HNRPD_HUMAN;tr|H0Y8G5|H0Y8G5_HUMAN	FALSE	27452044	28347408	27886236	23471376	37263692	25101340	0
tr|Q5T4U5|Q5T4U5_HUMAN;tr|B7Z9I1|B7Z9I1_HUMAN;sp|P11310-2|ACADM_HUMAN;sp|P11310|ACADM_HUMAN	FALSE	11271643	7.6334e+06	9074493	17324144	12486107	8436731	0.00160128
sp|Q92901|RL3L_HUMAN	FALSE	21336284	48300012	53144684	47346720	65159948	53903840	0.000980392
sp|P50990-3|TCPQ_HUMAN	FALSE	201917696	161931104	180900976	155959584	185342976	136537952	0
tr|E5RGZ4|E5RGZ4_HUMAN;tr|K7EKN2|K7EKN2_HUMAN;tr|E5RG95|E5RG95_HUMAN;tr|E5RI09|E5RI09_HUMAN;tr|K7EPM1|K7EPM1_HUMAN	FALSE	605908224	420492960	496912320	423775392	548325056	427177792	0.00160128
sp|Q9NY65-2|TBA8_HUMAN;tr|C9J2C0|C9J2C0_HUMAN;sp|Q9NY65|TBA8_HUMAN	FALSE	304421472	288506144	294649216	367844928	450877792	359569088	0
sp|Q15654|TRIP6_HUMAN	FALSE	1.28194e+06	2.9603e+06	4.40877e+06	3.41465e+06	4879395	3.52834e+06	0.003885
sp|Q9Y262|EIF3L_HUMAN;sp|Q9Y262-2|EIF3L_HUMAN;tr|B0QY89|B0QY89_HUMAN;tr|B0QY90|B0QY90_HUMAN	FALSE	3.36483e+06	2.73236e+06	3.21745e+06	3430773	3736532	2974184	0.00160128
sp|P13929-2|ENOB_HUMAN;sp|P13929-3|ENOB_HUMAN;sp|P13929|ENOB_HUMAN	FALSE	257122784	208631248	240288704	215121584	290077120	221247264	0
tr|F8VWV4|F8VWV4_HUMAN	FALSE	16079586	11450809	14758914	13248328	15566563	9696014	0
tr|A0A2R8Y6G6|A0A2R8Y6G6_HUMAN	FALSE	2795412736	2109882752	2443257856	2103045888	2638358784	2095601664	0
tr|J3QR64|J3QR64_HUMAN	FALSE	32109042	22772248	28410438	27474606	37680848	28387316	0.00160128
tr|H0YLP6|H0YLP6_HUMAN;sp|P46779-5|RL28_HUMAN;sp|P46779-4|RL28_HUMAN;tr|H0YMF4|H0YMF4_HUMAN	FALSE	11483446	7066066	11057672	19768056	24288494	14376008	0.000980392
tr|E9PK25|E9PK25_HUMAN;tr|G3V1A4|G3V1A4_HUMAN;sp|P23528|COF1_HUMAN	FALSE	214381568	203252208	241545440	215689216	286652032	228585584	0
sp|O75367|H2AY_HUMAN;sp|O75367-2|H2AY_HUMAN;sp|O75367-3|H2AY_HUMAN	FALSE	59907244	48390036	42082376	36836484	46752720	35764068	0.000980392
tr|F8W020|F8W020_HUMAN;tr|B7Z9C2|B7Z9C2_HUMAN;tr|F8VRJ2|F8VRJ2_HUMAN;tr|F8VV59|F8VV59_HUMAN;tr|F5H4R6|F5H4R6_HUMAN;tr|F8W118|F8W118_HUMAN;tr|H0YIV4|H0YIV4_HUMAN;tr|F8VY35|F8VY35_HUMAN;tr|H0YHC3|H0YHC3_HUMAN;tr|F8W0J6|F8W0J6_HUMAN;sp|P55209-2|NP1L1_HUMAN;sp|P55209|NP1L1_HUMAN	FALSE	58233920	45205664	52881208	43556972	64131416	49469440	0
sp|P00390-2|GSHR_HUMAN;sp|P00390-4|GSHR_HUMAN;sp|P00390-3|GSHR_HUMAN;sp|P00390|GSHR_HUMAN;sp|P00390-5|GSHR_HUMAN	FALSE	390132896	327003776	369675072	305597600	429132960	333983584	0.00160128
sp|Q6EEV6|SUMO4_HUMAN;sp|P55854|SUMO3_HUMAN;tr|A8MUA9|A8MUA9_HUMAN;sp|P61956-2|SUMO2_HUMAN;sp|P55854-2|SUMO3_HUMAN;tr|A8MU27|A8MU27_HUMAN;sp|P61956|SUMO2_HUMAN	FALSE	117185664	86085240	96789904	80930984	115776712	88082832	0.000980392
tr|E9PQK7|E9PQK7_HUMAN;tr|E9PQQ4|E9PQQ4_HUMAN;tr|E9PK54|E9PK54_HUMAN;tr|E9PLF4|E9PLF4_HUMAN	FALSE	14410784	34993688	36860036	119951672	155053136	117084232	0.000980392
tr|J3KTM9|J3KTM9_HUMAN;sp|Q14974-2|IMB1_HUMAN	FALSE	17680936	26052154	25939658	30421474	39461544	25419312	0
sp|O95831-2|AIFM1_HUMAN;sp|O95831|AIFM1_HUMAN;sp|O95831-3|AIFM1_HUMAN	FALSE	8131077	6.7849e+06	9839019	7.79136e+06	11023057	7.0303e+06	0.000980392
tr|Q5QPQ2|Q5QPQ2_HUMAN;tr|Q5QPQ1|Q5QPQ1_HUMAN;sp|O95372|LYPA2_HUMAN;tr|Q5QPN5|Q5QPN5_HUMAN;tr|Q5QPN9|Q5QPN9_HUMAN;tr|Q5QPQ3|Q5QPQ3_HUMAN	FALSE	5075243	5.17542e+06	7540854	4606382	8282290	6.0778e+06	0.00160128
tr|S4R3G0|S4R3G0_HUMAN;sp|Q13242|SRSF9_HUMAN	FALSE	26149430	14305892	19837380	17390092	25069098	18710830	0.00160128
sp|P60842|IF4A1_HUMAN	FALSE	138035840	98328936	130147792	112627960	144331376	102594720	0
tr|E9PKH2|E9PKH2_HUMAN	FALSE	14705494	9122184	12448477	11040559	21391974	18101650	0.00160128
sp|P16949|STMN1_HUMAN;tr|A2A2D0|A2A2D0_HUMAN;sp|P16949-2|STMN1_HUMAN	FALSE	22894516	17723956	22544338	19026518	14461506	13069379	0.000980392
sp|O43390-4|HNRPR_HUMAN	FALSE	32185816	28365406	36083392	34556348	39507588	28358186	0
tr|A0A0U1RRH9|A0A0U1RRH9_HUMAN;sp|Q6ZU15|SEP14_HUMAN;tr|G3V1Q4|G3V1Q4_HUMAN;tr|E7EPK1|E7EPK1_HUMAN;sp|Q16181|SEPT7_HUMAN;tr|E7ES33|E7ES33_HUMAN;tr|A0A0U1RRE1|A0A0U1RRE1_HUMAN;sp|Q16181-2|SEPT7_HUMAN	FALSE	22996664	16038708	20558034	16446544	23299132	18851816	0
tr|J3QSB4|J3QSB4_HUMAN	FALSE	51245416	34140844	40358268	33214442	44281764	38610432	0.00160128
tr|J3KPX7|J3KPX7_HUMAN;sp|Q99623|PHB2_HUMAN;sp|Q99623-2|PHB2_HUMAN	FALSE	31585608	23011316	31301286	39329608	37304020	28983466	0.00160128
sp|O60506|HNRPQ_HUMAN;sp|O60506-3|HNRPQ_HUMAN;tr|B7Z645|B7Z645_HUMAN;sp|O60506-2|HNRPQ_HUMAN;sp|O60506-4|HNRPQ_HUMAN	FALSE	13807898	12256922	13461551	17931052	22616638	18743466	0
tr|F8WBP8|F8WBP8_HUMAN;tr|A0A0D9SG95|A0A0D9SG95_HUMAN	FALSE	18760014	19660118	24276924	23984202	35736644	40547244	0.00160128
sp|P15531-2|NDKA_HUMAN;tr|E7ERL0|E7ERL0_HUMAN;sp|P15531|NDKA_HUMAN	FALSE	124420320	88808488	101369568	97902896	127709216	89474912	0.000980392
tr|E9PIZ1|E9PIZ1_HUMAN;tr|H0YCK7|H0YCK7_HUMAN;tr|E9PMW7|E9PMW7_HUMAN	FALSE	3.00774e+06	2409398	2.78783e+06	2.21772e+06	3609559	3004940	0.00160128
tr|J3KS93|J3KS93_HUMAN;tr|J3KT04|J3KT04_HUMAN	FALSE	64924968	52532164	54456352	51973652	67881528	49741904	0.000980392
tr|F5H5D3|F5H5D3_HUMAN;sp|Q9BQE3|TBA1C_HUMAN	FALSE	78451272	72398400	71743352	86973640	99459800	78012200	0.000980392
tr|A0A2R8YDN5|A0A2R8YDN5_HUMAN	FALSE	231173408	269353184	332795456	252494496	349734784	271734304	0
sp|P51665|PSMD7_HUMAN	FALSE	1.93561e+06	3.41982e+06	3.74477e+06	3.21328e+06	4.21688e+06	3.53663e+06	0.00160128
sp|P53396|ACLY_HUMAN;sp|P53396-2|ACLY_HUMAN	FALSE	139482144	99815248	122684448	112147072	140178944	113152320	0
tr|A0A087WWY3|A0A087WWY3_HUMAN	FALSE	95092984	56503752	63128456	59407840	72411872	56545412	0
sp|P07910-3|HNRPC_HUMAN	FALSE	47436668	28700086	34042960	34355060	40207440	29264246	0.00160128
sp|P00338-2|LDHA_HUMAN;sp|P00338-5|LDHA_HUMAN	FALSE	218583456	167760320	205471664	194349776	263749792	199475488	0
tr|C9JFC0|C9JFC0_HUMAN;tr|C9JPH9|C9JPH9_HUMAN;tr|A0A0A0MSB2|A0A0A0MSB2_HUMAN	FALSE	27827002	29592404	30799152	28979678	34140396	25871648	0.000980392
sp|P32754|HPPD_HUMAN;tr|A0A0B4J1R4|A0A0B4J1R4_HUMAN;sp|P32754-2|HPPD_HUMAN	FALSE	184226144	165015088	172550944	136434048	238851552	176967664	0
sp|P84103|SRSF3_HUMAN;sp|P84103-2|SRSF3_HUMAN;tr|A0A087X2D0|A0A087X2D0_HUMAN	FALSE	17769146	11144293	13433275	18261188	16590120	14985522	0.000980392
tr|B4DWT1|B4DWT1_HUMAN;tr|S4R3C4|S4R3C4_HUMAN	FALSE	8.00162e+06	7104796	8.23513e+06	7.65185e+06	11944758	8170860	0
tr|A0A087WUW5|A0A087WUW5_HUMAN	FALSE	5.60447e+06	9333064	9873443	8645934	19077954	9897545	0.00316957
sp|Q15149-5|PLEC_HUMAN;sp|Q15149-7|PLEC_HUMAN;sp|Q15149-8|PLEC_HUMAN;sp|Q15149-6|PLEC_HUMAN;sp|Q15149|PLEC_HUMAN;sp|Q15149-4|PLEC_HUMAN;sp|Q15149-9|PLEC_HUMAN;sp|Q15149-3|PLEC_HUMAN;sp|Q15149-2|PLEC_HUMAN	FALSE	40263656	34012116	42213276	38921080	47752320	38060620	0
sp|P21912|SDHB_HUMAN	FALSE	181931152	0	123604680	6543595	130952992	14045650	0.00160128
sp|P27708|PYR1_HUMAN;tr|F8VPD4|F8VPD4_HUMAN	FALSE	105746912	77399568	92220968	88628024	128603512	90593992	0
tr|A0A286YFM8|A0A286YFM8_HUMAN	FALSE	35896948	23492974	23893478	20327904	25308888	16203952	0.000980392
sp|Q13185|CBX3_HUMAN	FALSE	16109827	11356234	19172078	15790495	20496644	15219918	0
tr|V9GYZ6|V9GYZ6_HUMAN	FALSE	50712036	32369412	36556748	32092780	45821920	30806342	0
tr|F5GXU1|F5GXU1_HUMAN;tr|F5GWW2|F5GWW2_HUMAN;tr|F5H8H6|F5H8H6_HUMAN;tr|F5GXC7|F5GXC7_HUMAN	FALSE	96006552	66605512	76353760	57190952	79119960	55311588	0
sp|O15479|MAGB2_HUMAN	FALSE	2.84372e+06	5.02058e+06	3.92403e+06	4.05305e+06	2.80776e+06	7.43993e+06	0.00160128
tr|F8W0A3|F8W0A3_HUMAN;tr|H0YIN7|H0YIN7_HUMAN	FALSE	71163592	61626284	68417152	64770808	93107008	69433928	0
tr|J3KT29|J3KT29_HUMAN;tr|C9JD32|C9JD32_HUMAN	FALSE	10839901	10731016	10964950	10617101	14330956	12056074	0
tr|C9J8F3|C9J8F3_HUMAN;tr|J3KSV6|J3KSV6_HUMAN;tr|K7EKH5|K7EKH5_HUMAN;tr|A8MVZ9|A8MVZ9_HUMAN;sp|P09972|ALDOC_HUMAN;tr|J3QKP5|J3QKP5_HUMAN	FALSE	64902044	45052288	52596028	40592356	51938772	45635240	0.000980392
tr|C9JB25|C9JB25_HUMAN;tr|C9IY94|C9IY94_HUMAN;tr|C9J938|C9J938_HUMAN	FALSE	6.4391e+06	9969952	12442170	9458723	14248106	9117479	0.00160128
tr|M0QZU1|M0QZU1_HUMAN;tr|A0A096LPE0|A0A096LPE0_HUMAN	FALSE	63526116	55238512	66910372	50430804	71915744	55564632	0.00160128
tr|R4GNH3|R4GNH3_HUMAN;tr|E9PM69|E9PM69_HUMAN;sp|P17980|PRS6A_HUMAN;tr|E9PKD5|E9PKD5_HUMAN	FALSE	6.95292e+06	4640085	7.75207e+06	7.69393e+06	6995028	7036186	0.00160128
tr|A0A087WV22|A0A087WV22_HUMAN;tr|F8W7C6|F8W7C6_HUMAN	FALSE	32859138	23135416	28578120	24784624	31785110	25720922	0
sp|Q8TAA3|PSMA8_HUMAN;sp|Q8TAA3-5|PSMA8_HUMAN;tr|A0A087WYS6|A0A087WYS6_HUMAN;sp|Q8TAA3-2|PSMA8_HUMAN	FALSE	27484604	26726934	28938000	19957376	37685800	22594420	0.000980392
tr|B1AHB1|B1AHB1_HUMAN;sp|P33992|MCM5_HUMAN	FALSE	9843760	7723550	13316214	12690195	10813760	7.58761e+06	0.00160128
tr|H0YFS2|H0YFS2_HUMAN	FALSE	75780680	83629632	102504872	82273256	133561176	87959832	0
tr|I3L1U9|I3L1U9_HUMAN;tr|I3L3I0|I3L3I0_HUMAN	FALSE	316039616	790618560	997056128	775539328	1228217088	1061031040	0
tr|E9PKU4|E9PKU4_HUMAN	FALSE	103344312	67286424	85368704	82081000	100989760	78588472	0.000980392
tr|D6RI02|D6RI02_HUMAN	FALSE	62215808	51040028	57561660	45120180	58778496	39906248	0
tr|H0YDD8|H0YDD8_HUMAN	FALSE	285682336	205896224	231377456	204138768	267196368	195366752	0
sp|P51991-2|ROA3_HUMAN;sp|P51991|ROA3_HUMAN	FALSE	51069548	46157544	63327292	52380284	80754440	54161324	0
tr|F8VUG2|F8VUG2_HUMAN	FALSE	86022480	77764496	77871184	64672752	88974832	70658856	0.000980392
tr|G3V325|G3V325_HUMAN;sp|P56134-2|ATPK_HUMAN;sp|P56134-3|ATPK_HUMAN;tr|C9JJT5|C9JJT5_HUMAN;sp|P56134|ATPK_HUMAN;sp|P56134-4|ATPK_HUMAN;tr|C9JU26|C9JU26_HUMAN	FALSE	10311635	8424076	11024184	10188092	11168585	8.37552e+06	0.000980392
sp|Q13263-2|TIF1B_HUMAN;sp|Q13263|TIF1B_HUMAN	FALSE	5.04558e+06	12534105	14937470	10283353	19018586	14212025	0
tr|C9JTK6|C9JTK6_HUMAN;sp|Q9NTK5-3|OLA1_HUMAN;tr|J3KQ32|J3KQ32_HUMAN;sp|Q9NTK5|OLA1_HUMAN	FALSE	8898176	7080680	8497532	9332007	10821882	6.58186e+06	0
sp|Q4KWH8-2|PLCH1_HUMAN;sp|Q4KWH8-3|PLCH1_HUMAN;tr|A0A2U3TZV8|A0A2U3TZV8_HUMAN;sp|Q4KWH8-4|PLCH1_HUMAN;sp|Q4KWH8|PLCH1_HUMAN	FALSE	29139720	14654704	21192854	2126387	4.65211e+06	3560466	0.000980392
sp|P23527|H2B1O_HUMAN;sp|P06899|H2B1J_HUMAN;sp|P33778|H2B1B_HUMAN;sp|Q8N257|H2B3B_HUMAN;sp|Q16778|H2B2E_HUMAN	FALSE	211316448	198976880	258462064	312298688	400525120	380183680	0
tr|F8W079|F8W079_HUMAN	FALSE	216029008	147474128	181090432	156364560	203222736	155946912	0
tr|A0A2R8Y793|A0A2R8Y793_HUMAN	FALSE	117975184	141573152	170829088	174971712	226546800	172503904	0
sp|P40227-2|TCPZ_HUMAN	FALSE	148343024	103630096	122869096	101176920	147193152	108838120	0
tr|G3V203|G3V203_HUMAN	FALSE	83641360	57144380	72643336	60386156	80579240	59115464	0
sp|P15259|PGAM2_HUMAN	FALSE	83824408	97836816	147964528	139441984	172796096	137758176	0.000980392
tr|J3KRE2|J3KRE2_HUMAN	FALSE	37490424	28905350	30776090	33434458	34967176	33360334	0
sp|P61204-2|ARF3_HUMAN	FALSE	5485693	3419279	3.46144e+06	3932490	4206591	4.88265e+06	0.000980392
tr|F8WE98|F8WE98_HUMAN	FALSE	6.85619e+06	12999511	14156266	10707072	17812202	14318654	0
tr|H3BUY5|H3BUY5_HUMAN	FALSE	10390568	9008272	11948724	8291283	15113536	10159682	0.000980392
tr|B4DY09|B4DY09_HUMAN;sp|Q12905|ILF2_HUMAN	FALSE	50028724	44274108	52526228	46102956	63232572	49452620	0
tr|H3BQ34|H3BQ34_HUMAN	FALSE	7977174	8960894	11350895	8967063	13964195	10652397	0.00540123
sp|P16403|H12_HUMAN;sp|P16402|H13_HUMAN;sp|P10412|H14_HUMAN	FALSE	161131952	116874440	130541144	114172336	162793744	130905080	0
tr|A0A087WV01|A0A087WV01_HUMAN	FALSE	92770888	83498856	94810232	90087008	122440464	96596320	0
sp|Q7L2H7|EIF3M_HUMAN;tr|J3KNJ2|J3KNJ2_HUMAN	FALSE	20315648	11682216	11683695	9034548	16815512	6565219	0.000980392
sp|P61088|UBE2N_HUMAN;tr|F8VV71|F8VV71_HUMAN;tr|F8VSD4|F8VSD4_HUMAN	FALSE	24544296	21598482	22827206	13886533	14805804	13581977	0
sp|P68104|EF1A1_HUMAN;sp|Q5VTE0|EF1A3_HUMAN	FALSE	1272558208	1014072064	1244148352	1049590464	1588445568	1225747712	0
sp|Q02543|RL18A_HUMAN;tr|M0R1A7|M0R1A7_HUMAN;tr|M0R3D6|M0R3D6_HUMAN	FALSE	80922656	95812768	116979872	86930432	148842976	106806576	0
tr|A6NL76|A6NL76_HUMAN	FALSE	195675856	159184672	184063488	161552800	206184352	160290272	0
sp|P41091|IF2G_HUMAN	FALSE	32278006	21173798	22728740	21240644	32221088	21471758	0.000980392
tr|Q9BYK1|Q9BYK1_HUMAN;tr|Q8WVC2|Q8WVC2_HUMAN;sp|P63220|RS21_HUMAN	FALSE	62001852	89539712	104219624	88118952	135610528	112372760	0.003885
tr|E9PSD5|E9PSD5_HUMAN;tr|E9PIZ4|E9PIZ4_HUMAN;sp|Q9UHD1-2|CHRD1_HUMAN;tr|E9PPQ5|E9PPQ5_HUMAN;sp|Q9UHD1|CHRD1_HUMAN	FALSE	3.25125e+06	6.3174e+06	6777192	5684100	9696722	9285838	0
sp|P12814-2|ACTN1_HUMAN;tr|H9KV75|H9KV75_HUMAN;sp|P12814-3|ACTN1_HUMAN;sp|P12814|ACTN1_HUMAN;sp|P12814-4|ACTN1_HUMAN	FALSE	22841994	15721162	19521238	18834312	25628522	20717542	0.000980392
tr|Q5T6W2|Q5T6W2_HUMAN	FALSE	494741312	350190208	378925888	350780608	445415072	352767104	0
tr|D6RB09|D6RB09_HUMAN	FALSE	43717444	34827760	39706316	37670836	53126508	37309424	0.000980392
tr|A0A1W2PRP1|A0A1W2PRP1_HUMAN	FALSE	15634131	9729270	13703100	12142639	17540116	12660903	0
sp|P56192|SYMC_HUMAN;sp|P56192-2|SYMC_HUMAN	FALSE	13691028	13043277	12606362	12811317	16315379	13059183	0.000980392
sp|P61158|ARP3_HUMAN;tr|B4DXW1|B4DXW1_HUMAN	FALSE	22167716	23291430	11455657	8.17661e+06	9434571	8050320	0.000980392
tr|H7C3I1|H7C3I1_HUMAN;tr|Q3KNR6|Q3KNR6_HUMAN;sp|Q8IZP2|ST134_HUMAN;tr|F6VDH7|F6VDH7_HUMAN	FALSE	78985808	60999552	51771316	51232412	66637780	49000236	0
sp|Q04760|LGUL_HUMAN;sp|Q04760-2|LGUL_HUMAN	FALSE	49279348	43219824	60561900	49173172	79086472	53086348	0.000980392
tr|H0YAP2|H0YAP2_HUMAN	FALSE	13999083	7.67719e+06	11153063	5484482	13122250	9787967	0
sp|O43681|ASNA_HUMAN;tr|K7ERW9|K7ERW9_HUMAN;tr|A0A087WXS7|A0A087WXS7_HUMAN	FALSE	6411700	4150278	7807911	6.70034e+06	8846924	2.48171e+06	0.00614439
sp|Q02790|FKBP4_HUMAN	FALSE	74976336	66404224	78257032	67325960	91782048	72565440	0
tr|A0A0C4DG06|A0A0C4DG06_HUMAN;tr|B8ZZ38|B8ZZ38_HUMAN;tr|C9JCA9|C9JCA9_HUMAN	FALSE	18036888	18116210	22774226	23222268	28046472	31870502	0
tr|Q5SYZ4|Q5SYZ4_HUMAN	FALSE	66652596	48385880	59094372	50784576	76110048	47107092	0
tr|E7EXB4|E7EXB4_HUMAN	FALSE	21287466	18411624	21275764	18529042	24788782	16883196	0
sp|P18124|RL7_HUMAN	FALSE	110920280	80922208	89128816	75853592	111296376	90424296	0
sp|P18754|RCC1_HUMAN;sp|P18754-2|RCC1_HUMAN;tr|C9JW69|C9JW69_HUMAN	FALSE	88151264	923707	62725112	1345032	76356888	997769	0.00239617
tr|C9JZR7|C9JZR7_HUMAN;tr|C9JUM1|C9JUM1_HUMAN	FALSE	103740216	133807888	144481472	118940512	159309808	111087064	0
sp|P41250|GARS_HUMAN	FALSE	23512604	29249856	27853934	30694800	40022120	32390332	0.000980392
tr|H0Y8E6|H0Y8E6_HUMAN;sp|P49736|MCM2_HUMAN	FALSE	29973302	37089520	37362140	32746808	41196824	36420808	0.00160128
tr|D6RIZ7|D6RIZ7_HUMAN;tr|H0Y914|H0Y914_HUMAN	FALSE	44183184	33796668	35931584	30243934	39642216	32235180	0
sp|P63173|RL38_HUMAN	FALSE	27078800	20786726	24629964	8993485	24553718	19796566	0
sp|P26639-2|SYTC_HUMAN	FALSE	88876264	65421908	82727424	76426160	82508304	55584252	0
sp|Q13151|ROA0_HUMAN	FALSE	37620856	30326754	35553792	35016180	44624512	33366056	0.000980392
tr|F8VR77|F8VR77_HUMAN	FALSE	49386772	39724348	44924336	39535900	51040024	40093824	0
tr|G3V4C1|G3V4C1_HUMAN;sp|P07910-2|HNRPC_HUMAN;sp|P07910|HNRPC_HUMAN;tr|G3V2Q1|G3V2Q1_HUMAN;tr|B2R5W2|B2R5W2_HUMAN;tr|G3V576|G3V576_HUMAN;tr|B4DY08|B4DY08_HUMAN;tr|G3V4W0|G3V4W0_HUMAN	FALSE	197109264	145192432	176316512	141636400	194579584	146549792	0
sp|P49755|TMEDA_HUMAN	FALSE	28354542	18809956	23616098	18751642	32476694	21419518	0
sp|Q58FF6|H90B4_HUMAN	FALSE	194338128	250181232	298447936	223682384	335274432	252062144	0
sp|P06744-2|G6PI_HUMAN;sp|P06744|G6PI_HUMAN;tr|A0A2U3TZU2|A0A2U3TZU2_HUMAN;tr|A0A0A0MTS2|A0A0A0MTS2_HUMAN	FALSE	116375184	113187520	133518872	133455632	174681408	125312728	0
tr|E9PIG2|E9PIG2_HUMAN;tr|E9PPV6|E9PPV6_HUMAN;tr|E9PMI5|E9PMI5_HUMAN;tr|E9PK86|E9PK86_HUMAN;tr|E9PR70|E9PR70_HUMAN;tr|E9PJH8|E9PJH8_HUMAN;tr|E9PNX1|E9PNX1_HUMAN;tr|E9PQ34|E9PQ34_HUMAN;tr|E9PRS3|E9PRS3_HUMAN	FALSE	12507906	22636504	27182840	26112322	27866804	30355804	0.00160128
sp|P37802|TAGL2_HUMAN;sp|P37802-2|TAGL2_HUMAN	FALSE	149765008	105499120	125475536	113817488	134291216	101426728	0
sp|P31947-2|1433S_HUMAN;sp|P31947|1433S_HUMAN	FALSE	47342516	36481788	41998296	35444436	49782600	34096892	0
sp|P38919|IF4A3_HUMAN	FALSE	11941132	8712322	13349862	11493856	15929874	10240680	0
sp|Q8IYT4|KATL2_HUMAN;sp|Q8IYT4-2|KATL2_HUMAN;tr|K7EM02|K7EM02_HUMAN;tr|K7EIJ8|K7EIJ8_HUMAN	FALSE	37777600	22836654	27308198	23103534	32877522	22977008	0.000980392
sp|Q58FF7|H90B3_HUMAN	FALSE	393603712	375575712	458293024	365073408	444574464	364098848	0
tr|A6NCQ0|A6NCQ0_HUMAN;tr|A6NFX8|A6NFX8_HUMAN;sp|Q9UKK9|NUDT5_HUMAN;tr|A6NJU6|A6NJU6_HUMAN;tr|H0YEY4|H0YEY4_HUMAN	FALSE	7.64417e+06	13591217	17783872	13128406	26277004	20708820	0
sp|P40926|MDHM_HUMAN	FALSE	114176552	88427344	109100656	88161816	118544512	87131760	0
sp|P23526|SAHH_HUMAN;sp|P23526-2|SAHH_HUMAN	FALSE	23592268	21421340	28677568	21057974	32964774	24332224	0.000980392
sp|Q14157-1|UBP2L_HUMAN;sp|Q14157-4|UBP2L_HUMAN;tr|F8W726|F8W726_HUMAN;sp|Q14157-5|UBP2L_HUMAN;tr|Q5VU77|Q5VU77_HUMAN;sp|Q14157-3|UBP2L_HUMAN;sp|Q14157|UBP2L_HUMAN	FALSE	8987359	6550674	7.43036e+06	7265525	10130132	7695196	0
tr|G3V4N7|G3V4N7_HUMAN	FALSE	104903944	72315272	92347032	77165192	100179968	76416888	0
tr|A0A0G2JIW1|A0A0G2JIW1_HUMAN;sp|P0DMV9|HS71B_HUMAN;sp|P0DMV8|HS71A_HUMAN	FALSE	566486720	445505792	483237120	450180512	561175488	422393632	0
sp|P50454|SERPH_HUMAN	FALSE	36199056	37523272	45527228	35403072	55383252	33798576	0
tr|I3L3Q7|I3L3Q7_HUMAN;tr|I3L3B0|I3L3B0_HUMAN	FALSE	80967744	127796992	126327736	126552808	165598512	128502640	0.000980392
sp|P32119-2|PRDX2_HUMAN	FALSE	106208888	85677960	97610976	93499904	112226624	87415000	0
tr|J3KRY1|J3KRY1_HUMAN;sp|P52565-2|GDIR1_HUMAN	FALSE	3.20159e+06	5.06944e+06	5.73977e+06	3.80003e+06	5.99077e+06	4581004	0.00614439
tr|Q5SX91|Q5SX91_HUMAN	FALSE	40251664	28968562	32802806	31345212	37251064	27668292	0.000980392
sp|P27797|CALR_HUMAN	FALSE	287465728	266808624	311861216	275113664	376373216	291109024	0
sp|P06730-2|IF4E_HUMAN;sp|P06730|IF4E_HUMAN;sp|P06730-3|IF4E_HUMAN;tr|D6RBW1|D6RBW1_HUMAN	FALSE	12742438	13188443	18180032	13981477	18588564	15003815	0
sp|P05783|K1C18_HUMAN	FALSE	567522944	486052224	595268160	594160192	755071616	645336640	0
tr|D6RF44|D6RF44_HUMAN	FALSE	75084928	59016824	52611952	43738348	56604564	40042324	0
sp|P00491|PNPH_HUMAN	FALSE	35059504	26822146	28607430	27846426	32192650	24378142	0
sp|Q07666|KHDR1_HUMAN;sp|Q07666-2|KHDR1_HUMAN	FALSE	39657768	33430000	37473948	33978632	49715872	33001280	0
tr|E9PP36|E9PP36_HUMAN	FALSE	122472648	80945352	97206048	84581160	105570008	87027680	0.000980392
tr|G3V4Z6|G3V4Z6_HUMAN;tr|A0A0C4DGL4|A0A0C4DGL4_HUMAN;sp|Q01650|LAT1_HUMAN;tr|H0YJ95|H0YJ95_HUMAN;sp|Q9UM01|YLAT1_HUMAN;sp|Q92536|YLAT2_HUMAN	FALSE	39229532	30082140	35913392	32428630	41375604	33882896	0.000980392
sp|Q16629-3|SRSF7_HUMAN;sp|Q16629|SRSF7_HUMAN;sp|Q16629-2|SRSF7_HUMAN;tr|A0A0B4J1Z1|A0A0B4J1Z1_HUMAN;sp|Q16629-4|SRSF7_HUMAN;tr|C9JAB2|C9JAB2_HUMAN	FALSE	58532996	42069900	62400752	59863732	75320248	66607644	0
sp|Q15056-2|IF4H_HUMAN;sp|Q15056|IF4H_HUMAN	FALSE	52572584	41073592	59556580	54974504	72664008	61072444	0.00160128
sp|Q6NXT2|H3C_HUMAN;tr|Q5TEC6|Q5TEC6_HUMAN	FALSE	313869120	227350256	272399552	251702592	309510496	220895776	0.00160128
tr|K7EM38|K7EM38_HUMAN;tr|A0A2R8YGF8|A0A2R8YGF8_HUMAN;tr|I3L3R2|I3L3R2_HUMAN;tr|J3KT65|J3KT65_HUMAN;tr|G5E9R0|G5E9R0_HUMAN;tr|E7EVS6|E7EVS6_HUMAN	FALSE	2242041344	2931418368	3323850752	2466515712	3456191232	2517238784	0
sp|P14618|KPYM_HUMAN	FALSE	40315564	35375576	40931404	34784876	52814000	39728776	0.000980392
tr|F8VQQ4|F8VQQ4_HUMAN	FALSE	121014944	90780648	108718088	85655104	130525984	93317136	0
sp|Q9BRA2|TXD17_HUMAN;tr|I3L2R6|I3L2R6_HUMAN	FALSE	22750368	13570920	16846324	15672721	21229434	14911709	0
sp|P48643|TCPE_HUMAN;tr|E7ENZ3|E7ENZ3_HUMAN	FALSE	160624256	119582160	149793952	108995016	152592080	122318184	0
sp|P62249|RS16_HUMAN;tr|Q6IPX4|Q6IPX4_HUMAN;tr|M0R1M5|M0R1M5_HUMAN;tr|M0QX76|M0QX76_HUMAN;tr|M0R3H0|M0R3H0_HUMAN;tr|M0R210|M0R210_HUMAN	FALSE	40197140	25679142	34328428	30346926	37228720	29355736	0
tr|I3L303|I3L303_HUMAN;tr|H3BT37|H3BT37_HUMAN;tr|H3BV27|H3BV27_HUMAN	FALSE	114055496	84973704	81894592	88287056	104257840	70163304	0
sp|Q9Y617-2|SERC_HUMAN	FALSE	54946348	43454840	24872338	20529178	32267544	21861904	0
tr|H0YKN4|H0YKN4_HUMAN;tr|H0YNB8|H0YNB8_HUMAN	FALSE	18564824	0	22662934	5601432	29233424	4904994	0.000980392
tr|C9JI87|C9JI87_HUMAN	FALSE	83444208	66362340	78729120	71524352	86835112	64946788	0
sp|Q9P258|RCC2_HUMAN	FALSE	22813464	29854696	34531748	28117308	37353924	27572526	0.000980392
sp|Q15102|PA1B3_HUMAN;tr|M0R389|M0R389_HUMAN	FALSE	7531913	5511229	6885502	6.06291e+06	7095893	6.18042e+06	0.000980392
sp|O60869-2|EDF1_HUMAN;sp|O60869|EDF1_HUMAN;sp|O60869-3|EDF1_HUMAN	FALSE	21760910	15133870	28737162	24453478	27368800	13368661	0
sp|P68363|TBA1B_HUMAN	FALSE	265885232	210118384	259428704	221280368	272547648	199578176	0
sp|P08729|K2C7_HUMAN	FALSE	21071546	17370386	14609499	13163726	16616075	11190990	0.000980392
tr|M0R278|M0R278_HUMAN;tr|M0QZL7|M0QZL7_HUMAN	FALSE	96244688	98509408	128601088	127999744	147259008	120742864	0
sp|P09382|LEG1_HUMAN	FALSE	147732656	152107280	178445840	156662288	225371648	172538544	0
tr|E5RJX2|E5RJX2_HUMAN	FALSE	107453464	74541568	89287536	75517456	109214096	78317664	0.00160128
tr|A0A0A0MRM9|A0A0A0MRM9_HUMAN;sp|Q14978|NOLC1_HUMAN;sp|Q14978-2|NOLC1_HUMAN;sp|Q14978-3|NOLC1_HUMAN	FALSE	60078156	33043654	33920708	34216328	42751132	31626594	0
tr|A0A286YFF3|A0A286YFF3_HUMAN;tr|A0A286YFK5|A0A286YFK5_HUMAN	FALSE	106827192	43720840	54429740	43397376	44611620	35149964	0
tr|E7ERA2|E7ERA2_HUMAN	FALSE	3770811	10705739	12405812	8501586	14101991	10587713	0.00160128
sp|P15170-3|ERF3A_HUMAN;sp|P15170-2|ERF3A_HUMAN;sp|P15170|ERF3A_HUMAN;sp|Q8IYD1|ERF3B_HUMAN;tr|H3BR35|H3BR35_HUMAN	FALSE	6.72587e+06	6.3207e+06	6861473	4.90283e+06	7.30974e+06	4.69031e+06	0
sp|Q13509-2|TBB3_HUMAN	FALSE	70254496	49377848	61856532	58759128	81042672	62884308	0
sp|A6NHL2-2|TBAL3_HUMAN;sp|A6NHL2|TBAL3_HUMAN	FALSE	43315496	57255020	67771256	46715056	84646400	64046968	0.000980392
sp|P36871|PGM1_HUMAN;tr|A0A3B3ITK7|A0A3B3ITK7_HUMAN	FALSE	18800698	17293386	20020028	18559838	20907600	18502120	0
sp|Q13011|ECH1_HUMAN;tr|M0R248|M0R248_HUMAN	FALSE	36748744	25828744	32140876	27987542	37725472	26649130	0.000980392
sp|P54652|HSP72_HUMAN	FALSE	512175808	366425568	459102496	426484704	540926464	422460320	0
tr|H0YH80|H0YH80_HUMAN	FALSE	232522528	189088608	227272304	200461216	260696176	193176544	0
sp|Q14568|HS902_HUMAN	FALSE	306561984	232664128	310408192	357067104	419964032	321869024	0
sp|P55060-4|XPO2_HUMAN	FALSE	43495588	35149020	37251060	29670098	41277640	30858332	0.00160128
tr|F5GZQ4|F5GZQ4_HUMAN;tr|F5H5J4|F5H5J4_HUMAN;tr|F5H6W8|F5H6W8_HUMAN	FALSE	18986464	11658955	15211864	10763327	14462922	10505372	0.000980392
tr|D6RAF8|D6RAF8_HUMAN	FALSE	38371656	30950460	31044960	28231956	38518460	27276580	0
tr|F8W026|F8W026_HUMAN	FALSE	902364288	610704512	407170176	373762752	489422432	365258880	0
sp|Q14151|SAFB2_HUMAN	FALSE	5.05667e+06	4492003	5394318	3.58559e+06	4684439	3.61619e+06	0.00160128
sp|P00338-3|LDHA_HUMAN;sp|P00338|LDHA_HUMAN	FALSE	56310616	42093276	50046248	39727544	49632904	37107488	0
tr|F8VYN5|F8VYN5_HUMAN	FALSE	173538512	230565280	281590784	197428256	306644512	229846448	0
sp|Q15651-2|HMGN3_HUMAN;sp|Q15651|HMGN3_HUMAN;tr|A0A087WZE9|A0A087WZE9_HUMAN	FALSE	18448312	14957634	17602634	12601265	23298754	14490678	0.00160128
sp|P24752-2|THIL_HUMAN;tr|E9PRQ6|E9PRQ6_HUMAN	FALSE	42718856	30267738	38983768	24389578	24276402	11114790	0.00160128
tr|M0R1H5|M0R1H5_HUMAN	FALSE	61657416	57262908	60515712	60369404	80025016	57052280	0
tr|V9GYY3|V9GYY3_HUMAN;sp|P11586|C1TC_HUMAN;tr|F5H2F4|F5H2F4_HUMAN	FALSE	12585186	8577756	10017504	9283332	12036600	9249919	0.00160128
sp|Q8TCJ2|STT3B_HUMAN	FALSE	14657144	22503478	16785186	27922712	18822636	0	0.00614439
tr|H0YL33|H0YL33_HUMAN;tr|H0YN28|H0YN28_HUMAN	FALSE	27415904	19878768	20129292	25336214	43117008	21362946	0.000980392
tr|B5MCP9|B5MCP9_HUMAN	FALSE	25434692	34230964	41396076	33773776	47164740	36299604	0
sp|P08670|VIME_HUMAN	FALSE	480540960	466725408	535969696	495497728	615465472	462011744	0.000980392
sp|P28066-2|PSA5_HUMAN;sp|P28066|PSA5_HUMAN	FALSE	12140622	25803834	30382284	24683240	40174328	26758272	0
sp|P46783|RS10_HUMAN	FALSE	32413842	23346686	28574594	20367544	37877788	27699468	0.000980392
tr|K7ER39|K7ER39_HUMAN;tr|K7EL96|K7EL96_HUMAN	FALSE	19193302	18345210	19270300	16940134	23515376	20262752	0
sp|Q13247-3|SRSF6_HUMAN;sp|Q13247|SRSF6_HUMAN	FALSE	49450816	37084116	44882976	36531944	50648664	39233172	0.000980392
tr|H0Y9V9|H0Y9V9_HUMAN;tr|A0A2R8Y5Y7|A0A2R8Y5Y7_HUMAN	FALSE	40211056	26729770	29965244	33394074	49960680	27883744	0.00239617
tr|R4GMX5|R4GMX5_HUMAN;sp|P35613-4|BASI_HUMAN;sp|P35613-3|BASI_HUMAN;tr|A0A087WUV8|A0A087WUV8_HUMAN	FALSE	47910832	39254500	47250824	41668032	51531892	42448888	0.000980392
tr|J3KRY3|J3KRY3_HUMAN;tr|S4R3P3|S4R3P3_HUMAN	FALSE	10050868	10373990	12115271	10410812	16283257	10304514	0.00160128
sp|P22626|ROA2_HUMAN	FALSE	472857376	332921728	424267040	383270784	479079744	356105120	0
sp|P23381-2|SYWC_HUMAN;sp|P23381|SYWC_HUMAN	FALSE	13723852	20170604	23244860	19529824	26341934	20054204	0.000980392
sp|P49321-2|NASP_HUMAN;sp|P49321-3|NASP_HUMAN;tr|E9PI86|E9PI86_HUMAN;sp|P49321|NASP_HUMAN;tr|E9PPR5|E9PPR5_HUMAN;tr|E9PPQ8|E9PPQ8_HUMAN	FALSE	9908467	8513392	6.16702e+06	6.31913e+06	9623940	6.55966e+06	0.00160128
tr|A0A0U1RRG3|A0A0U1RRG3_HUMAN	FALSE	32436878	45887500	57189424	43071328	63355952	50537584	0
sp|Q6DN03|H2B2C_HUMAN;sp|Q6DRA6|H2B2D_HUMAN	FALSE	528852896	405459232	441249984	475865088	621822912	486069824	0
sp|P61604|CH10_HUMAN	FALSE	131514088	99688096	118757464	95348680	134070088	105189768	0
tr|D6RDG3|D6RDG3_HUMAN;sp|P20290|BTF3_HUMAN;sp|P20290-2|BTF3_HUMAN;tr|H0Y9Y1|H0Y9Y1_HUMAN	FALSE	31376928	56789536	72806048	55525232	84744616	60072568	0
tr|Q5R211|Q5R211_HUMAN	FALSE	167842240	120228880	158509248	153438416	212427488	169858752	0
sp|P62906|RL10A_HUMAN	FALSE	421327968	330931840	377105536	319945856	448290944	353913696	0
tr|F5H136|F5H136_HUMAN;tr|F5H676|F5H676_HUMAN;tr|F5GZI8|F5GZI8_HUMAN;tr|F5H726|F5H726_HUMAN	FALSE	51001564	55516116	73177408	51978512	77708744	62277056	0
tr|Q5T5C7|Q5T5C7_HUMAN;sp|P49591|SYSC_HUMAN	FALSE	45820076	41799932	52022416	38764420	65258928	41588548	0
sp|Q14344|GNA13_HUMAN;sp|Q03113|GNA12_HUMAN	FALSE	27274072	19278768	22928508	14894985	24826128	20431514	0.00160128
tr|H0YKL9|H0YKL9_HUMAN	FALSE	48442768	68149728	78044368	61373888	92225056	67707176	0
tr|E9PK06|E9PK06_HUMAN	FALSE	11647968	13799856	16017443	12851610	17331514	12361392	0.00160128
tr|G3V2H6|G3V2H6_HUMAN	FALSE	133415896	100199656	128186272	115652248	142640496	109676928	0
tr|H3BT13|H3BT13_HUMAN	FALSE	7.59106e+06	22948150	21892848	24737102	33498088	26413460	0.00160128
tr|F5GY37|F5GY37_HUMAN;tr|F5H3X6|F5H3X6_HUMAN;tr|F5GWA7|F5GWA7_HUMAN	FALSE	25241042	17128200	21985040	19919158	30466090	21636708	0
tr|E7EQR4|E7EQR4_HUMAN;sp|P15311|EZRI_HUMAN	FALSE	126612616	86862592	124501808	102824504	129464840	115637704	0
tr|I3L398|I3L398_HUMAN	FALSE	60334804	34206244	47519972	40645928	58340476	41808200	0
sp|Q08043|ACTN3_HUMAN;tr|G3V2X9|G3V2X9_HUMAN;tr|A0A087WSZ2|A0A087WSZ2_HUMAN;tr|G3V2N5|G3V2N5_HUMAN	FALSE	12945417	9653348	10984378	8266931	15759415	10032806	0.000980392
tr|F8WDB3|F8WDB3_HUMAN;tr|F5H6T5|F5H6T5_HUMAN;tr|F5H1V1|F5H1V1_HUMAN	FALSE	34256324	24471886	31083980	25681816	33665172	23983014	0
sp|P62304|RUXE_HUMAN	FALSE	9166509	7.96955e+06	7.46883e+06	8.27903e+06	7895991	7.34068e+06	0.000980392
tr|E9PJT3|E9PJT3_HUMAN;sp|Q13435|SF3B2_HUMAN;tr|E9PPJ0|E9PPJ0_HUMAN;tr|E9PJ04|E9PJ04_HUMAN;tr|H0YCG1|H0YCG1_HUMAN	FALSE	13314301	11192965	14577787	12719320	18796666	9418026	0.00160128
tr|B1AHC9|B1AHC9_HUMAN	FALSE	33245618	49325452	50143152	39656968	66567708	47213296	0
tr|A0A0U1RQF0|A0A0U1RQF0_HUMAN	FALSE	1351180160	1077882240	1173178112	862744576	1115612032	846852352	0
sp|P23246|SFPQ_HUMAN	FALSE	153138992	112601240	139103152	115698992	157595728	122891672	0
sp|Q53EL6|PDCD4_HUMAN;sp|Q53EL6-2|PDCD4_HUMAN	FALSE	6.13045e+06	12816131	15593867	15643734	16834106	18347616	0.00160128
sp|P17661|DESM_HUMAN	FALSE	121000400	90559888	94964160	87693720	111238848	86002176	0.000980392
tr|A8K7Q2|A8K7Q2_HUMAN	FALSE	53064008	41613536	55451536	51513040	81407592	40521608	0.000980392
sp|P30101|PDIA3_HUMAN	FALSE	251948688	235508992	285534272	225251120	319977088	294727712	0
tr|J3KMX5|J3KMX5_HUMAN	FALSE	36703552	31483304	35036928	32373982	46165712	33024168	0
sp|P17066|HSP76_HUMAN	FALSE	140174832	104232008	119635360	132970840	146984752	114659440	0.000980392
sp|Q9H4B7|TBB1_HUMAN	FALSE	265849120	202285360	253912336	235581856	289763488	227099200	0
tr|K7EN27|K7EN27_HUMAN	FALSE	80723072	169594416	218533184	78507784	197965232	217150176	0.000980392
tr|H7BY16|H7BY16_HUMAN	FALSE	364833184	254096816	303152512	243691968	339205984	245606160	0
sp|P61981|1433G_HUMAN	FALSE	137431568	85351384	109506416	85702328	122927248	88140776	0
sp|Q99832-3|TCPH_HUMAN	FALSE	95329120	69765800	80471344	65980412	90059864	63380624	0
tr|Q5JRR6|Q5JRR6_HUMAN	FALSE	71686040	66442940	65803400	44332332	58580672	43993732	0
XXX_sp|Q5RHP9|ERIC3_HUMAN;XXX_sp|Q5RHP9-3|ERIC3_HUMAN	TRUE	248819	217537	150877	1.84094e+06	1.33085e+06	5.00388e+06	0.00690714
sp|Q99729-2|ROAA_HUMAN;tr|D6RD18|D6RD18_HUMAN;sp|Q99729-3|ROAA_HUMAN;tr|D6R9P3|D6R9P3_HUMAN;tr|D6RBZ0|D6RBZ0_HUMAN	FALSE	71198344	42135768	55693340	47219352	64389824	50220144	0
tr|K7EJH8|K7EJH8_HUMAN	FALSE	57088428	47583620	58883212	49106552	64474256	42651264	0
tr|K7ERX7|K7ERX7_HUMAN	FALSE	107165232	83463296	94965464	83887672	106622456	82040024	0
sp|P67870|CSK2B_HUMAN;tr|Q5SRQ6|Q5SRQ6_HUMAN	FALSE	5.69608e+06	3.6876e+06	6.27278e+06	5.27063e+06	5881915	5632328	0.000980392
tr|H0YNP5|H0YNP5_HUMAN	FALSE	23043682	24273910	26682894	27195452	38610000	29824750	0
tr|F5H0E2|F5H0E2_HUMAN	FALSE	178159728	345312	3.3673e+06	7823139	12549031	5.6858e+06	0.00160128
tr|D6RF62|D6RF62_HUMAN	FALSE	15203745	35423064	92583320	105642800	77561112	14527878	0.00160128
tr|B4DV51|B4DV51_HUMAN	FALSE	88998512	73447984	88698288	88500976	126081768	94161408	0
tr|H0YFX4|H0YFX4_HUMAN	FALSE	33339590	43216676	44572424	77565624	64438572	54366364	0.000980392
sp|P04908|H2A1B_HUMAN;sp|Q93077|H2A1C_HUMAN;sp|Q7L7L0|H2A3_HUMAN	FALSE	1544526848	1140226432	1397410688	1116272512	1696954240	1322437760	0
sp|Q15691|MARE1_HUMAN	FALSE	12864645	9987810	12806705	9604952	14778928	10158594	0.000980392
tr|C9K028|C9K028_HUMAN	FALSE	148960160	132613976	169254448	162838064	205449104	157904816	0
sp|B5ME19|EIFCL_HUMAN;sp|Q99613-2|EIF3C_HUMAN;sp|Q99613|EIF3C_HUMAN	FALSE	17482456	14958723	14072049	15403958	18305580	11264022	0.000980392
sp|P00558-2|PGK1_HUMAN	FALSE	243073168	238483600	284719136	292474240	386638176	314713312	0
tr|J3KRZ1|J3KRZ1_HUMAN	FALSE	22348436	23910016	30687538	27392002	43245724	26205034	0
sp|P62318-2|SMD3_HUMAN;sp|P62318|SMD3_HUMAN	FALSE	34926600	25438696	33958980	26436682	36605388	27314386	0
sp|P68036|UB2L3_HUMAN;sp|P68036-3|UB2L3_HUMAN;sp|P68036-2|UB2L3_HUMAN	FALSE	33125732	24403890	28907670	24374848	29916484	26592098	0
tr|A0A1W2PPS1|A0A1W2PPS1_HUMAN;sp|Q00839-2|HNRPU_HUMAN;sp|Q00839|HNRPU_HUMAN	FALSE	58843736	65593884	68653344	71488080	94802056	79202616	0.000980392
sp|O15427|MOT4_HUMAN	FALSE	7044311	9527610	14362552	9214412	15522918	16275294	0.000980392
sp|Q6PKG0-3|LARP1_HUMAN;tr|H0YBW1|H0YBW1_HUMAN;tr|A0A0B4J210|A0A0B4J210_HUMAN;sp|Q6PKG0|LARP1_HUMAN;tr|E5RHK4|E5RHK4_HUMAN;tr|H0YAN4|H0YAN4_HUMAN;tr|E5RH50|E5RH50_HUMAN	FALSE	5187439	3.70924e+06	4.23849e+06	3.832e+06	4.91505e+06	4.11784e+06	0.00160128
sp|P26373|RL13_HUMAN	FALSE	48824864	32697262	42055736	39566200	52374704	38778212	0
tr|J3QSB5|J3QSB5_HUMAN;sp|Q9Y3U8|RL36_HUMAN	FALSE	57141544	36426012	47238484	39594668	57678728	45962292	0
sp|P30613-2|KPYR_HUMAN;sp|P30613|KPYR_HUMAN	FALSE	295252160	205660848	253109056	203354272	271631936	203828304	0.000980392
sp|Q99832|TCPH_HUMAN	FALSE	20800084	18222424	26250966	22668722	35331224	34159412	0.000980392
sp|Q96DG6|CMBL_HUMAN	FALSE	9818496	9662712	14396548	11258824	19033018	11005656	0
sp|P04083|ANXA1_HUMAN;tr|Q5T3N1|Q5T3N1_HUMAN	FALSE	25353454	14127528	18669402	14355597	23411262	18911382	0.000980392
tr|H0Y4R1|H0Y4R1_HUMAN;sp|P12268|IMDH2_HUMAN	FALSE	122843736	117793752	147582160	110079176	157541184	123904048	0
sp|Q96ER9-2|CCD51_HUMAN;sp|Q96ER9|CCD51_HUMAN	FALSE	2.21823e+06	2.1933e+06	2.10898e+06	3.15471e+06	3.31987e+06	2.86399e+06	0.00160128
tr|F8WEA1|F8WEA1_HUMAN	FALSE	8751745	8084570	9511282	8580464	11965125	9722282	0.00160128
sp|Q16878|CDO1_HUMAN	FALSE	43720944	49818728	80874400	33532908	63117912	37292988	0.00160128
tr|A0A0C4DG17|A0A0C4DG17_HUMAN;tr|C9J9K3|C9J9K3_HUMAN;sp|P08865|RSSA_HUMAN	FALSE	120972856	124753384	156302288	173768624	229461248	169987152	0.000980392
sp|P62273-2|RS29_HUMAN;tr|A0A2R8Y851|A0A2R8Y851_HUMAN;sp|P62273|RS29_HUMAN	FALSE	7.96435e+06	27843288	36028504	19365052	40056772	30838306	0.00160128
sp|Q14847|LASP1_HUMAN;sp|Q14847-2|LASP1_HUMAN;tr|C9J9W2|C9J9W2_HUMAN	FALSE	13978422	10812794	12071247	10138810	16201987	12084410	0.000980392
tr|A0A087WZM5|A0A087WZM5_HUMAN;sp|P62942|FKB1A_HUMAN;tr|A0A087WV48|A0A087WV48_HUMAN;tr|Q1JUQ3|Q1JUQ3_HUMAN;tr|A0A087WTS4|A0A087WTS4_HUMAN	FALSE	20537906	11133922	13788786	11004070	15800900	12304303	0.00160128
tr|A0A075B724|A0A075B724_HUMAN	FALSE	40018328	35607524	37097524	33065910	45002184	32984476	0.000980392
tr|H3BRW8|H3BRW8_HUMAN;sp|Q9P1Z2-4|CACO1_HUMAN;sp|Q9P1Z2-3|CACO1_HUMAN;sp|Q9P1Z2|CACO1_HUMAN	FALSE	9859897	232467664	351495072	392902304	42852960	1.31724e+06	0.00614439
tr|F8VZS0|F8VZS0_HUMAN	FALSE	15938110	11117031	14293621	13322789	15050348	9998077	0
sp|P06733|ENOA_HUMAN	FALSE	546561728	479866528	559458304	566868864	698016512	566506816	0
tr|F8VRK7|F8VRK7_HUMAN;tr|F8VQY6|F8VQY6_HUMAN	FALSE	155776992	122555048	145777056	124595632	158256512	126293408	0
sp|P50991-2|TCPD_HUMAN	FALSE	70366632	53643400	66019844	55838084	73853360	55306376	0
sp|P48047|ATPO_HUMAN	FALSE	20778460	13538576	14637065	12697994	15242057	9151830	0.000980392
sp|Q92945|FUBP2_HUMAN;tr|A0A087WTP3|A0A087WTP3_HUMAN	FALSE	26528524	21279904	23319402	18658974	23381932	19497656	0.000980392
tr|H0Y6E7|H0Y6E7_HUMAN;tr|H3BT71|H3BT71_HUMAN	FALSE	41250436	28967186	34285068	28218586	40777776	30498600	0
tr|H0YIV0|H0YIV0_HUMAN	FALSE	48555848	39060040	43553984	39169860	48687208	39146676	0
tr|D6RBD0|D6RBD0_HUMAN	FALSE	50262484	54510964	60285412	190904944	166371008	155709072	0.000980392
tr|E7ERJ7|E7ERJ7_HUMAN	FALSE	14297033	9781060	11729351	12759668	14748302	11836906	0.000980392
sp|P15121|ALDR_HUMAN;tr|E9PCX2|E9PCX2_HUMAN	FALSE	20860138	17852436	19498728	14349320	21932186	18430518	0
tr|G3V279|G3V279_HUMAN	FALSE	6.07103e+06	8888771	7.72163e+06	6.40088e+06	11972061	6627107	0.000980392
sp|P22314-2|UBA1_HUMAN;sp|P22314|UBA1_HUMAN	FALSE	295870144	209990672	256200224	239295552	295636000	221791328	0
sp|P50991|TCPD_HUMAN	FALSE	96398224	92717720	112124624	87675520	137356736	109806656	0
sp|Q92616|GCN1_HUMAN	FALSE	10752860	6642251	10035534	8090895	10857602	9329920	0.000980392
sp|Q9UBR2|CATZ_HUMAN	FALSE	33703752	27263408	30721874	30758902	39888556	29537142	0.000980392
sp|P62995|TRA2B_HUMAN;sp|P62995-3|TRA2B_HUMAN;tr|H7C2L4|H7C2L4_HUMAN	FALSE	8640012	5489688	7006574	5858527	9028893	7.31216e+06	0.000980392
tr|A0A0J9YYH3|A0A0J9YYH3_HUMAN;tr|A0A0J9YX90|A0A0J9YX90_HUMAN;tr|A0A2R8Y6C7|A0A2R8Y6C7_HUMAN;tr|A0A0J9YXP8|A0A0J9YXP8_HUMAN	FALSE	54012128	52718036	50402948	45781920	63604628	41992408	0.000980392
sp|P22102|PUR2_HUMAN;sp|P22102-2|PUR2_HUMAN	FALSE	57502164	38635976	51644124	46116164	59299792	42640052	0
sp|Q9UQ80|PA2G4_HUMAN;sp|Q9UQ80-2|PA2G4_HUMAN	FALSE	144745904	108436824	150799440	134515136	170410832	129895336	0.000980392
tr|G3V1A1|G3V1A1_HUMAN	FALSE	39589136	56900184	60088496	52926552	74460264	54403676	0
sp|Q13155|AIMP2_HUMAN;tr|A8MU58|A8MU58_HUMAN;sp|Q13155-2|AIMP2_HUMAN	FALSE	3385788	11416115	12849660	8523249	14710432	11903223	0.000980392
tr|K7EJT5|K7EJT5_HUMAN	FALSE	50637768	34084224	36343556	29765656	41401084	32720332	0.000980392
sp|Q12931-2|TRAP1_HUMAN;sp|Q12931|TRAP1_HUMAN	FALSE	38280980	38730312	45385324	15171036	17933946	13211130	0.000980392
tr|H7BZU1|H7BZU1_HUMAN	FALSE	12539714	13684270	22027806	16878750	22188906	18275546	0.000980392
tr|E9PFF2|E9PFF2_HUMAN	FALSE	199082784	240411680	274441664	191549200	271692672	221238784	0
sp|P12004|PCNA_HUMAN	FALSE	141581936	128629856	152209872	129809952	192235040	142791632	0
sp|P31946|1433B_HUMAN;sp|P31946-2|1433B_HUMAN	FALSE	19213568	16208201	18541884	16406190	22657474	17516072	0
tr|H0YB80|H0YB80_HUMAN;tr|B7Z2E6|B7Z2E6_HUMAN	FALSE	75263040	75045736	89391584	66290212	93551568	71434872	0
sp|Q9UBQ0|VPS29_HUMAN;tr|F8VXU5|F8VXU5_HUMAN;sp|Q9UBQ0-2|VPS29_HUMAN	FALSE	22680086	21286406	19525606	16097404	22256208	15848229	0
sp|P68133|ACTS_HUMAN;sp|P68032|ACTC_HUMAN	FALSE	271343136	183064768	260025184	190236560	290853280	243797344	0
sp|P29966|MARCS_HUMAN	FALSE	15498062	14086363	14643381	13558474	17905506	13995379	0
sp|P21333-2|FLNA_HUMAN;tr|Q60FE5|Q60FE5_HUMAN;sp|P21333|FLNA_HUMAN	FALSE	42991876	46239640	79452472	57112968	87517952	72002176	0.000980392
sp|Q16658|FSCN1_HUMAN	FALSE	209326896	181030912	199974848	179385296	247001536	180933248	0
sp|P62820|RAB1A_HUMAN;tr|E7END7|E7END7_HUMAN;sp|Q9H0U4|RAB1B_HUMAN	FALSE	11882763	17241278	16031215	17773980	23701248	15878669	0.00160128
sp|P55036|PSMD4_HUMAN;sp|P55036-2|PSMD4_HUMAN;tr|Q5VWC4|Q5VWC4_HUMAN;tr|A6PVX3|A6PVX3_HUMAN	FALSE	13688527	9790081	12732768	11242258	15928395	12494917	0
tr|C9JSZ1|C9JSZ1_HUMAN	FALSE	16559400	11977394	14883072	10773958	15797384	10601160	0.000980392
sp|P54577|SYYC_HUMAN	FALSE	40916628	31624376	38024132	31075690	44266672	32145884	0
tr|C9IZZ0|C9IZZ0_HUMAN;tr|C9J7D1|C9J7D1_HUMAN	FALSE	33760108	26204148	27445094	27057414	34338352	23974622	0
tr|H0YMW4|H0YMW4_HUMAN;tr|H0YKX9|H0YKX9_HUMAN;tr|H0YLV6|H0YLV6_HUMAN;tr|H0YKZ7|H0YKZ7_HUMAN;tr|H0YMT9|H0YMT9_HUMAN	FALSE	111761560	93318360	102125224	98499088	110884968	98520032	0
sp|Q96EP5|DAZP1_HUMAN;tr|K7EK33|K7EK33_HUMAN;sp|Q96EP5-2|DAZP1_HUMAN;tr|K7EQ55|K7EQ55_HUMAN;tr|K7EQ02|K7EQ02_HUMAN	FALSE	4.17936e+06	3.79494e+06	4604973	3.65971e+06	5.17001e+06	3.36343e+06	0.00160128
tr|U3KPS5|U3KPS5_HUMAN	FALSE	48744112	71875096	76104752	66963640	99335816	73925440	0.000980392
tr|A0A2R8Y4L2|A0A2R8Y4L2_HUMAN	FALSE	20664344	25391508	24814452	21987958	26733010	39499752	0
tr|D6RDL0|D6RDL0_HUMAN;tr|D6RF17|D6RF17_HUMAN	FALSE	22856920	17109606	45968100	42856372	43058308	17705044	0.00160128
tr|Q5T7N0|Q5T7N0_HUMAN	FALSE	76869824	86490880	104435488	73553504	112265528	90838552	0.000980392
tr|A0A2R8Y623|A0A2R8Y623_HUMAN;sp|P62081|RS7_HUMAN	FALSE	48653956	35589416	37134208	33864920	41259288	32785570	0
tr|E9PEX6|E9PEX6_HUMAN;sp|P09622-3|DLDH_HUMAN;sp|P09622-2|DLDH_HUMAN;sp|P09622|DLDH_HUMAN	FALSE	3.28014e+06	2.86125e+06	3.21774e+06	2.60316e+06	4.31938e+06	2.81828e+06	0.00160128
sp|P63104-2|1433Z_HUMAN	FALSE	263413920	187618960	228965344	202115984	265089264	201623792	0
tr|H7BZ94|H7BZ94_HUMAN	FALSE	3.99461e+06	2.20308e+06	2.90709e+06	2096622	2.92828e+06	2505180	0.00160128
tr|M0R1H6|M0R1H6_HUMAN	FALSE	58504356	45383332	48960396	34379900	54000708	33964968	0
tr|Q5JRS2|Q5JRS2_HUMAN;tr|Q5JRR9|Q5JRR9_HUMAN;tr|Q5JRS0|Q5JRS0_HUMAN	FALSE	20545484	16120610	18377082	13579655	19785532	14533360	0
tr|Q5JR01|Q5JR01_HUMAN;tr|A6PW80|A6PW80_HUMAN	FALSE	170459232	230505280	283876960	231401488	350168064	269934528	0
sp|P00338-4|LDHA_HUMAN	FALSE	122812632	121804248	137348656	119726952	166059472	116879032	0
sp|P52209|6PGD_HUMAN;sp|P52209-2|6PGD_HUMAN;tr|K7EMN2|K7EMN2_HUMAN;tr|K7EM49|K7EM49_HUMAN	FALSE	11391532	10297990	14959691	18200158	19361470	19060484	0.00160128
sp|P49748|ACADV_HUMAN;sp|P49748-3|ACADV_HUMAN;sp|P49748-2|ACADV_HUMAN	FALSE	11149805	8742972	13399619	7868960	14890101	10220425	0
sp|P35232|PHB_HUMAN;tr|C9JW96|C9JW96_HUMAN	FALSE	94895040	66145880	74375288	73115344	104720384	82145008	0
tr|A0A3B3IS95|A0A3B3IS95_HUMAN	FALSE	535128448	495302272	569003328	552126464	712460928	530525248	0
tr|H3BPK7|H3BPK7_HUMAN	FALSE	6793623	15723390	15771516	28173626	23611618	27802386	0.00160128
tr|A0A0A0MRL0|A0A0A0MRL0_HUMAN	FALSE	19014920	14701262	9968706	12434447	10482840	9369227	0
sp|Q96SI9|STRBP_HUMAN;sp|Q96SI9-2|STRBP_HUMAN	FALSE	20721582	13090211	15803018	13498311	17263340	15720399	0
tr|F5H018|F5H018_HUMAN	FALSE	37240568	104601008	115986208	84699024	142397680	100600480	0.000980392
tr|M0R0R2|M0R0R2_HUMAN;tr|M0R0F0|M0R0F0_HUMAN;sp|P46782|RS5_HUMAN	FALSE	22893990	13247380	20256872	16986644	26231574	20430490	0
tr|A0A087WUT6|A0A087WUT6_HUMAN;sp|O60841|IF2P_HUMAN	FALSE	34693460	5903983	17628460	30699258	13174768	28188326	0.00160128
tr|H0YDN1|H0YDN1_HUMAN	FALSE	24969772	25861286	19829600	19232576	17919142	17223904	0.00160128
tr|A0A0B4J269|A0A0B4J269_HUMAN	FALSE	319082944	217762768	258953248	242370944	306681088	214919376	0
tr|G5E9R3|G5E9R3_HUMAN;tr|E9PEL3|E9PEL3_HUMAN;sp|P61513|RL37A_HUMAN;tr|M0R0A1|M0R0A1_HUMAN;tr|M0R2L6|M0R2L6_HUMAN;tr|C9J4Z3|C9J4Z3_HUMAN;tr|Q6P4E4|Q6P4E4_HUMAN	FALSE	28065812	31216000	37904292	33949780	51095792	35110180	0.000980392
sp|Q96AY3|FKB10_HUMAN	FALSE	8566724	5.04862e+06	5804470	5.12529e+06	6.48191e+06	4.86514e+06	0.000980392
sp|O60361|NDK8_HUMAN	FALSE	245929360	176169104	201782304	161244992	226164208	162009504	0
sp|Q8NC51-3|PAIRB_HUMAN;sp|Q8NC51|PAIRB_HUMAN	FALSE	15316265	30439968	33938348	23160282	43934572	35709612	0
sp|P05787|K2C8_HUMAN;sp|P05787-2|K2C8_HUMAN	FALSE	1062027008	779576448	912463552	772943808	968808256	739755136	0
tr|G3V5V7|G3V5V7_HUMAN;tr|G3V2D6|G3V2D6_HUMAN	FALSE	307262464	213330000	191509696	192133584	222121216	212965904	0.00160128
tr|K7ELC2|K7ELC2_HUMAN;tr|S4R417|S4R417_HUMAN;sp|P62841|RS15_HUMAN;tr|A0A0B4J2B4|A0A0B4J2B4_HUMAN;tr|K7EQJ5|K7EQJ5_HUMAN;tr|K7EM56|K7EM56_HUMAN	FALSE	49038640	38720444	50792008	41711048	54874232	45048236	0
tr|Q5TCI8|Q5TCI8_HUMAN	FALSE	21261954	18516400	23358910	20296774	31623250	23975924	0
sp|B2RPK0|HGB1A_HUMAN	FALSE	28312662	36007184	44746208	39351932	53665984	39677924	0
tr|B4DT28|B4DT28_HUMAN	FALSE	11816410	8340710	12538998	10257295	12596303	10174664	0
tr|M0R2T4|M0R2T4_HUMAN	FALSE	56196504	97800696	104080624	102406272	152806928	115017448	0.000980392
XXX_sp|Q3SYC2-2|MOGT2_HUMAN;XXX_sp|Q3SYC2-3|MOGT2_HUMAN;XXX_sp|Q3SYC2|MOGT2_HUMAN	TRUE	18210478	10485366	122931	0	565923	0	0.00540123
tr|B5MDF5|B5MDF5_HUMAN;sp|P62826|RAN_HUMAN;tr|J3KQE5|J3KQE5_HUMAN	FALSE	95376640	85621080	89185008	85548016	111536544	84989336	0
sp|P49458|SRP09_HUMAN	FALSE	26786082	18767530	23201046	17454208	27286352	21796750	0.000980392
sp|P13010|XRCC5_HUMAN	FALSE	50910008	43655632	64667612	61643604	75854848	61240472	0
tr|V9GYG0|V9GYG0_HUMAN	FALSE	141884384	145979472	195636416	149802368	222026560	173668112	0
sp|P50395-2|GDIB_HUMAN;sp|P50395|GDIB_HUMAN	FALSE	53476084	37892164	47630284	35949388	51126260	34418812	0.000980392
sp|P30050|RL12_HUMAN	FALSE	144126768	110499648	117352224	108591032	143476320	110214560	0
tr|C9K025|C9K025_HUMAN;tr|F8WBS5|F8WBS5_HUMAN;tr|F8WB72|F8WB72_HUMAN;sp|P18077|RL35A_HUMAN	FALSE	43432252	32066760	46380228	42114584	56741336	46243940	0
sp|P60903|S10AA_HUMAN	FALSE	54900796	38712452	51324108	40190616	58925152	39864684	0
tr|H0Y8S0|H0Y8S0_HUMAN	FALSE	73200144	58070528	64176376	60234360	70341584	54062928	0
sp|P62857|RS28_HUMAN	FALSE	36261552	30718302	36878932	34112508	43704420	32335214	0.000980392
sp|Q15181|IPYR_HUMAN	FALSE	38162728	30015386	35972776	61348868	64546248	61733808	0
tr|J3QLE5|J3QLE5_HUMAN;sp|P63162|RSMN_HUMAN;sp|P14678-3|RSMB_HUMAN;sp|P14678-2|RSMB_HUMAN;sp|P63162-2|RSMN_HUMAN;sp|P14678|RSMB_HUMAN	FALSE	54071168	38834476	45236668	41590532	54032464	37523016	0.00160128
sp|P09874|PARP1_HUMAN	FALSE	20314816	18108776	19330596	18829344	32140544	18158400	0
tr|F8VX11|F8VX11_HUMAN	FALSE	5.38057e+06	3.92918e+06	3.90555e+06	4245979	3.54791e+06	3.71087e+06	0.00160128
sp|Q92526-3|TCPW_HUMAN;sp|Q92526|TCPW_HUMAN	FALSE	20133668	13559367	15745127	14852859	18278568	14414107	0.00160128
tr|H0YI37|H0YI37_HUMAN	FALSE	29855804	44964028	55533384	41910536	62992084	46833320	0.000980392
tr|K7ERC6|K7ERC6_HUMAN	FALSE	25818886	13014428	17468456	21504974	23139538	19091668	0.00160128
tr|J3QSF1|J3QSF1_HUMAN	FALSE	77500544	57428508	66934960	67176976	99279288	78331056	0
sp|P14324-2|FPPS_HUMAN;sp|P14324|FPPS_HUMAN	FALSE	28856508	20781174	26150696	28172324	38252948	30271312	0
tr|A0A2R8Y4A2|A0A2R8Y4A2_HUMAN	FALSE	69150808	78007272	87509824	78370760	116023584	88945272	0.000980392
sp|P00558|PGK1_HUMAN	FALSE	991932480	767079360	905863488	755714368	995666688	764787904	0
tr|B8ZZ51|B8ZZ51_HUMAN	FALSE	63158436	56764152	67663064	69709952	82242888	66502752	0.000980392
tr|I3NI03|I3NI03_HUMAN	FALSE	39490480	31311512	35004792	28900188	39418020	29701926	0
sp|Q9BRL6-2|SRSF8_HUMAN;sp|Q9BRL6|SRSF8_HUMAN	FALSE	72652920	40380408	64772340	49785620	74739704	48230672	0.00160128
tr|A0A1W2PQD4|A0A1W2PQD4_HUMAN	FALSE	95785208	86363304	102512184	100299112	138034976	109254544	0
sp|P29401|TKT_HUMAN;sp|P29401-2|TKT_HUMAN	FALSE	397280128	505478400	594755776	541911552	760362176	627662080	0
tr|A0A1W2PPL4|A0A1W2PPL4_HUMAN;tr|A0A1W2PP34|A0A1W2PP34_HUMAN;tr|A0A1W2PQL0|A0A1W2PQL0_HUMAN;tr|A0A1W2PPH7|A0A1W2PPH7_HUMAN	FALSE	154067968	112367720	127978640	111695032	145920144	111836232	0
tr|K7EJP1|K7EJP1_HUMAN	FALSE	60123584	45701616	54113968	46067604	61029184	53017876	0
tr|F8W6I7|F8W6I7_HUMAN;sp|P09651-3|ROA1_HUMAN;sp|P09651-2|ROA1_HUMAN;sp|P09651|ROA1_HUMAN	FALSE	3.50404e+06	3.25621e+06	4.17951e+06	2796461	4.60635e+06	3912390	0
tr|J3QQT9|J3QQT9_HUMAN	FALSE	17642388	24195222	31717100	21065008	39498948	27329522	0.000980392
tr|Q3BDU5|Q3BDU5_HUMAN	FALSE	266931664	187507216	222157968	203534480	256089728	193911152	0
tr|J3KTN0|J3KTN0_HUMAN	FALSE	22077364	15227049	23211236	14992283	21058932	15573092	0.00160128
sp|P30040|ERP29_HUMAN;tr|F8VY02|F8VY02_HUMAN	FALSE	13970284	10302611	11163662	10973130	14687785	9368879	0
tr|M0R0Y6|M0R0Y6_HUMAN	FALSE	61247584	43415312	51443216	50326108	63441800	49760732	0
sp|P43243|MATR3_HUMAN;tr|A8MXP9|A8MXP9_HUMAN;tr|A0A0R4J2E8|A0A0R4J2E8_HUMAN	FALSE	15265908	11792688	9384469	13249001	15999994	12924850	0.00160128
sp|Q92598-2|HS105_HUMAN;sp|Q92598-4|HS105_HUMAN;sp|Q92598-3|HS105_HUMAN;sp|Q92598|HS105_HUMAN	FALSE	34040700	24900064	19950516	24329418	36600600	26530220	0.000980392
sp|P60174|TPIS_HUMAN;sp|P60174-1|TPIS_HUMAN	FALSE	948126336	856786496	932573120	938632576	1208931712	902973248	0
sp|P53396-3|ACLY_HUMAN	FALSE	59424592	46824420	47796024	34848692	62316608	36295400	0.00160128
sp|Q15286|RAB35_HUMAN;tr|F5H157|F5H157_HUMAN;sp|Q15286-2|RAB35_HUMAN	FALSE	29573726	20519878	26358052	20088848	29087854	20776560	0
tr|F6THM6|F6THM6_HUMAN	FALSE	8720834	14095586	20302370	15423364	20822232	19325564	0.00160128
tr|K7EJB9|K7EJB9_HUMAN	FALSE	448515264	326084288	414150080	316110912	448513504	327314304	0
tr|J3QKK1|J3QKK1_HUMAN	FALSE	3347769	26246400	20053056	24902908	24421108	28598002	0.00316957
tr|F8VQQ8|F8VQQ8_HUMAN	FALSE	13833618	11885408	10603416	14697993	16945168	11094014	0.00160128
tr|M0QY96|M0QY96_HUMAN	FALSE	16478847	20959066	26192632	22666080	33431184	24947582	0.003885
tr|A0A087WXQ8|A0A087WXQ8_HUMAN;tr|A0A087WUL2|A0A087WUL2_HUMAN;sp|P49720|PSB3_HUMAN;tr|A0A087WY10|A0A087WY10_HUMAN	FALSE	17697926	17549428	16700757	17886002	21858878	15722011	0.000980392
tr|E7ESK7|E7ESK7_HUMAN	FALSE	20832338	17512652	21280220	24543772	28460414	23575134	0
sp|Q9NV70|EXOC1_HUMAN;sp|Q9NV70-2|EXOC1_HUMAN	FALSE	19011998	24189452	14772298	0	214298	78424.5	0.00540123
sp|A5A3E0|POTEF_HUMAN	FALSE	542893568	440875040	526591648	489662080	607718976	494342720	0
sp|P14866|HNRPL_HUMAN	FALSE	23380620	26103136	30006514	27354152	37230832	26844140	0
sp|P60953|CDC42_HUMAN	FALSE	21373512	25125562	28028684	22219176	35119624	26536736	0
sp|O75531|BAF_HUMAN	FALSE	12470860	9432709	11474946	11174239	15977396	9332513	0.000980392
sp|P60866|RS20_HUMAN;sp|P60866-2|RS20_HUMAN	FALSE	30615672	31788384	41953824	26154578	42844376	27328116	0.00160128
sp|P35241-4|RADI_HUMAN	FALSE	62363676	39818240	49050992	42875796	62452328	49641084	0.000980392
tr|K7EQR9|K7EQR9_HUMAN	FALSE	37507468	22476264	36319168	24575310	35311680	33425456	0
tr|B4DJF2|B4DJF2_HUMAN;tr|I3L3T1|I3L3T1_HUMAN	FALSE	37364808	25524054	32600702	26119934	46943888	31763740	0.000980392
tr|B7ZAR1|B7ZAR1_HUMAN;tr|E9PCA1|E9PCA1_HUMAN;sp|P48643-2|TCPE_HUMAN	FALSE	86190400	50348984	93641944	63475120	133260736	87082008	0
sp|P02545-2|LMNA_HUMAN;sp|P02545-6|LMNA_HUMAN	FALSE	44615164	46439848	48693640	40322972	42783304	37770044	0.000980392
sp|Q08J23|NSUN2_HUMAN;sp|Q08J23-3|NSUN2_HUMAN;sp|Q08J23-2|NSUN2_HUMAN	FALSE	35148952	25954588	30008212	31426606	41259780	29319332	0
sp|P26641-2|EF1G_HUMAN;sp|P26641|EF1G_HUMAN	FALSE	495524032	500072032	579107776	497102432	643409600	520793888	0
sp|Q9BYX7|ACTBM_HUMAN	FALSE	87394008	119763504	138968256	98109160	148324832	115667808	0
tr|A0A2R8Y6I8|A0A2R8Y6I8_HUMAN	FALSE	359956800	358185888	395100672	350119648	473449728	361857536	0
sp|Q9Y3F4|STRAP_HUMAN;sp|Q9Y3F4-2|STRAP_HUMAN	FALSE	41483428	32637256	38720592	32374550	39264088	31359146	0.000980392
tr|B7Z7P8|B7Z7P8_HUMAN;sp|P62495|ERF1_HUMAN;sp|P62495-2|ERF1_HUMAN	FALSE	8445354	7635628	7.07271e+06	5810598	11018438	7.23512e+06	0.000980392
tr|J3QR09|J3QR09_HUMAN;sp|P84098|RL19_HUMAN;tr|J3KTE4|J3KTE4_HUMAN	FALSE	23823304	18201350	25196870	23861046	28485496	32481410	0.000980392
tr|B9A041|B9A041_HUMAN	FALSE	14498590	10002178	14725891	17216192	23663572	16823306	0
tr|A0A2R8Y5S7|A0A2R8Y5S7_HUMAN;sp|P35241|RADI_HUMAN;sp|P35241-5|RADI_HUMAN;tr|A0A2R8Y7M3|A0A2R8Y7M3_HUMAN	FALSE	45565260	35696144	36186060	34283516	44313260	35393752	0.00160128
sp|P53999|TCP4_HUMAN	FALSE	113174664	88576480	79330184	89908576	111613528	77422280	0.000980392
tr|F8VZA3|F8VZA3_HUMAN;tr|F8VU16|F8VU16_HUMAN;tr|F8VWR1|F8VWR1_HUMAN	FALSE	65853452	45330156	46088852	38215904	48967404	39499880	0
sp|P23396|RS3_HUMAN	FALSE	14802873	13180823	13731285	12518480	16633245	12731198	0.00160128
sp|P07910-4|HNRPC_HUMAN	FALSE	17470638	15242285	14105156	16247323	20281038	16308489	0
tr|E9PCW0|E9PCW0_HUMAN;tr|E7ESE2|E7ESE2_HUMAN;tr|C9JZ20|C9JZ20_HUMAN	FALSE	80762848	60544872	76650840	64749740	73479160	64556772	0.000980392
tr|C9JIS1|C9JIS1_HUMAN;tr|C9JZN1|C9JZN1_HUMAN;tr|E7EP32|E7EP32_HUMAN;sp|Q9HAV0|GBB4_HUMAN;tr|C9JXA5|C9JXA5_HUMAN;sp|P62879|GBB2_HUMAN	FALSE	26573062	24281770	26727096	27788978	39380076	31015334	0.00160128
tr|C9JDS9|C9JDS9_HUMAN	FALSE	204271328	276531360	354923264	265591568	400605632	308200064	0
tr|H0YN26|H0YN26_HUMAN;sp|P39687|AN32A_HUMAN	FALSE	59291616	50409596	64781380	64495504	93103912	73482536	0.000980392
sp|Q96AE4-2|FUBP1_HUMAN;sp|Q96AE4|FUBP1_HUMAN;tr|E9PEB5|E9PEB5_HUMAN	FALSE	56696208	51526936	53122884	57738268	66889436	34264056	0.00160128
tr|I3L0S0|I3L0S0_HUMAN	FALSE	10554156	14297080	29315614	17559956	22175098	21379572	0.000980392
sp|A0A0B4J2A2|PAL4C_HUMAN;sp|P0DN37|PAL4G_HUMAN	FALSE	143909792	179656960	135562464	192718416	117944064	9599623	0.003885
sp|P31153-2|METK2_HUMAN	FALSE	17894326	11017755	15331224	10100795	14055255	8851353	0.00160128
sp|P49773|HINT1_HUMAN	FALSE	63175004	53993800	65043420	52217228	75296448	50460428	0
tr|F8VQ14|F8VQ14_HUMAN	FALSE	125839128	93103008	111752024	100132296	126751640	75688320	0.000980392
sp|Q86V81|THOC4_HUMAN;tr|E9PB61|E9PB61_HUMAN	FALSE	11030561	13173751	19857948	14084768	22174144	14761985	0.00160128
tr|C9JZW3|C9JZW3_HUMAN;tr|F2Z2G2|F2Z2G2_HUMAN	FALSE	7.8667e+06	10800197	14464029	23978362	28790158	21557660	0.00160128
tr|J3KSZ0|J3KSZ0_HUMAN	FALSE	40384080	25875816	34053708	25514660	43008824	33719836	0
tr|H0Y8L7|H0Y8L7_HUMAN	FALSE	41057276	26265090	29946570	26520980	32996932	23667948	0
sp|P55072|TERA_HUMAN	FALSE	203884848	193928912	248002336	226223056	276173632	226016048	0
sp|P14174|MIF_HUMAN	FALSE	496850016	424281568	472395744	473096096	607661376	467247200	0.000980392
sp|P30084|ECHM_HUMAN	FALSE	15857279	11573101	11547977	10150932	15831435	9703139	0.00160128
tr|G3V2Y4|G3V2Y4_HUMAN	FALSE	7.19745e+06	7647536	12580802	12610338	18054054	12857157	0.00160128
sp|Q4VXU2|PAP1L_HUMAN	FALSE	57042856	47340456	49811628	57589652	52194424	54298560	0.000980392
sp|P26447|S10A4_HUMAN	FALSE	470708992	385391296	427170464	367192544	499390560	388353344	0
tr|A0A087WVZ1|A0A087WVZ1_HUMAN;tr|A0A0J9YVQ7|A0A0J9YVQ7_HUMAN	FALSE	15521874	11599671	22491950	11550537	17817898	10519466	0.00540123
sp|P11142-2|HSP7C_HUMAN	FALSE	45809668	54510128	64806120	53948640	78926360	58830932	0
tr|E9PKE3|E9PKE3_HUMAN	FALSE	512048800	363499136	429176032	374623776	465001440	352109248	0
tr|H0YFC6|H0YFC6_HUMAN	FALSE	219733936	166770128	187152992	146988592	189399472	146086000	0.000980392
tr|H0Y9P0|H0Y9P0_HUMAN	FALSE	211796960	166782368	188167280	160493216	225605536	160958528	0
sp|P02545|LMNA_HUMAN;sp|P02545-3|LMNA_HUMAN	FALSE	61007704	46294444	57726364	57695864	62315136	49347184	0.000980392
sp|O75643|U520_HUMAN	FALSE	1.41587e+06	5.37612e+06	5263572	3434232	7.78849e+06	3.99346e+06	0.00160128
tr|A0A0J9YYC4|A0A0J9YYC4_HUMAN	FALSE	9883866	13239564	19158120	23242710	29535840	24567736	0
tr|D3YTI8|D3YTI8_HUMAN	FALSE	74619400	55193144	67752152	52648824	81086352	62230592	0
tr|J3QLI9|J3QLI9_HUMAN;sp|P62314|SMD1_HUMAN	FALSE	12092655	7130413	11455520	11887629	12981344	9982091	0.000980392
sp|P33993-3|MCM7_HUMAN;sp|P33993|MCM7_HUMAN	FALSE	5489084	9551198	11708241	8.24475e+06	12908808	9867828	0.00160128
tr|H3BU31|H3BU31_HUMAN	FALSE	50583824	79374512	78770576	65338440	91568976	70532960	0.000980392
sp|Q01518-2|CAP1_HUMAN;sp|Q01518|CAP1_HUMAN	FALSE	17826946	11535730	15573468	11271183	18075472	15398609	0
sp|Q96HS1-2|PGAM5_HUMAN;sp|Q96HS1|PGAM5_HUMAN	FALSE	2.19751e+06	6.63221e+06	7.31677e+06	3.9315e+06	7096689	4678472	0.000980392
tr|E9PN91|E9PN91_HUMAN	FALSE	101050560	74238464	86064680	77899040	102408576	71951600	0
tr|H7C0C1|H7C0C1_HUMAN	FALSE	36957380	27208368	31045488	24706200	34889868	25366688	0
tr|E9PQD7|E9PQD7_HUMAN	FALSE	78697696	84643288	103569696	82209984	116936504	88537904	0
tr|F8VXZ7|F8VXZ7_HUMAN;tr|F8W0F6|F8W0F6_HUMAN	FALSE	104226616	96040760	105153256	107428424	142138288	102902968	0.000980392
sp|P38646|GRP75_HUMAN	FALSE	302224864	234405488	289090048	243390224	306895008	261985824	0
sp|O43390-2|HNRPR_HUMAN;sp|O43390|HNRPR_HUMAN	FALSE	23353558	44988808	57243064	41599008	66167588	50277456	0
sp|Q15185-2|TEBP_HUMAN	FALSE	75498216	56295184	79321712	73130088	99500176	77797296	0
tr|H0YEU2|H0YEU2_HUMAN	FALSE	67638272	69780696	76999424	68578920	89925104	65807504	0.00160128
tr|H3BNC9|H3BNC9_HUMAN;tr|A0A075B716|A0A075B716_HUMAN;sp|P08708|RS17_HUMAN;tr|H0YN88|H0YN88_HUMAN	FALSE	77990256	65829632	88254336	62427384	100532328	69246208	0
tr|G3V4U2|G3V4U2_HUMAN;tr|G3V3W7|G3V3W7_HUMAN;tr|G3V3J6|G3V3J6_HUMAN	FALSE	56196504	97800696	104080624	102406272	152806928	115017448	0.000980392
sp|P0DPK2|H3Y_HUMAN;tr|A0A2R8Y7G9|A0A2R8Y7G9_HUMAN;sp|P0DPK5|H3X_HUMAN	FALSE	232000384	117298712	139934992	143806784	181458624	133506968	0.00316957
tr|H0YEQ8|H0YEQ8_HUMAN;tr|B1ANR1|B1ANR1_HUMAN	FALSE	24245324	16830124	19090416	18596410	24546432	15542726	0
tr|H0YAF8|H0YAF8_HUMAN	FALSE	71068936	50816300	61025432	55696184	69953472	51251388	0
tr|M0QYS1|M0QYS1_HUMAN;sp|P40429|RL13A_HUMAN	FALSE	102549024	83890744	101137944	97734256	128715024	94199496	0
tr|H3BT25|H3BT25_HUMAN	FALSE	142587008	250337104	331125984	233217952	385035488	283638240	0
tr|C9JL25|C9JL25_HUMAN	FALSE	88373168	65235924	97948808	98894424	116835992	90892096	0.000980392
tr|M0R1I1|M0R1I1_HUMAN	FALSE	437428320	375340896	516539456	511509056	600003904	484277184	0
sp|P61978-2|HNRPK_HUMAN;sp|P61978|HNRPK_HUMAN	FALSE	301706496	407801024	449962144	459167584	614961024	470327904	0
tr|D6RHJ3|D6RHJ3_HUMAN;tr|D6RD16|D6RD16_HUMAN	FALSE	22690790	43303860	15313451	16656962	11166359	17017194	0.000980392
tr|A0A1W2PRZ7|A0A1W2PRZ7_HUMAN	FALSE	259313792	193443824	227126048	209988576	250277408	190676224	0
sp|P39023|RL3_HUMAN	FALSE	45655272	50954644	52836828	47973728	65594068	45886352	0.000980392
sp|P40925|MDHC_HUMAN;sp|P40925-3|MDHC_HUMAN;sp|P40925-2|MDHC_HUMAN	FALSE	40067960	30816738	34973000	29568758	40343500	35401336	0
sp|P32119|PRDX2_HUMAN	FALSE	132974736	84413560	111247456	93007440	125974520	95397000	0
sp|P68363-2|TBA1B_HUMAN	FALSE	88533648	79221192	97615544	93504512	118326688	93609744	0
sp|Q9H0I9|TKTL2_HUMAN	FALSE	52599936	41159796	48349820	43499644	53349096	40738488	0.00540123
sp|P12235|ADT1_HUMAN	FALSE	89774032	79634328	91973080	77522696	91242040	87737776	0.000980392
sp|P20700|LMNB1_HUMAN;tr|E9PBF6|E9PBF6_HUMAN	FALSE	22177792	19015664	25879686	18662326	28307148	20744522	0
sp|Q9Y277|VDAC3_HUMAN;sp|Q9Y277-2|VDAC3_HUMAN	FALSE	6904035	5.57525e+06	6.98551e+06	6729596	8610438	5789532	0
tr|K7ERK8|K7ERK8_HUMAN;tr|A0A0J9YXM3|A0A0J9YXM3_HUMAN;tr|A0A0J9YXH9|A0A0J9YXH9_HUMAN;tr|K7EIL4|K7EIL4_HUMAN	FALSE	92110504	74831224	76478848	73108424	85108480	51323752	0.000980392
tr|A0A0D9SEM4|A0A0D9SEM4_HUMAN;sp|Q08170|SRSF4_HUMAN	FALSE	49450816	37084116	44882976	36531944	50648664	39233172	0.000980392
sp|Q9BVA1|TBB2B_HUMAN;sp|Q13885|TBB2A_HUMAN	FALSE	110149192	108736360	129557816	130462632	151786400	123274096	0
tr|H3BNC1|H3BNC1_HUMAN	FALSE	80040560	62489868	74594728	63289028	78137032	59687488	0
sp|Q13283|G3BP1_HUMAN	FALSE	344855552	324480128	404826176	216369680	248061632	223981488	0
sp|P57053|H2BFS_HUMAN	FALSE	864369216	699996160	825387904	686400000	917581056	689868096	0
tr|H3BR70|H3BR70_HUMAN	FALSE	683969536	543530304	642934656	546778560	759132992	613929984	0
sp|Q9UII2|ATIF1_HUMAN	FALSE	11732913	10203904	12502795	8407396	19282996	14757515	0
tr|Q5SZW8|Q5SZW8_HUMAN	FALSE	20161120	16955736	20102658	21603502	30044820	23938006	0
sp|P62913|RL11_HUMAN;tr|Q5VVC8|Q5VVC8_HUMAN;sp|P62913-2|RL11_HUMAN	FALSE	202733504	155171584	177798112	152889216	196844400	152807072	0
tr|G3V2J8|G3V2J8_HUMAN	FALSE	49706888	79146560	73119616	105040544	120417024	70099824	0.000980392
sp|P31040-2|SDHA_HUMAN;sp|P31040|SDHA_HUMAN	FALSE	3.05187e+06	12968748	15783145	13549768	17277972	12784578	0.00160128
tr|V9GZ54|V9GZ54_HUMAN	FALSE	100781368	78220648	85233880	60500644	83082840	71188048	0.000980392
tr|A0A0G2JJZ9|A0A0G2JJZ9_HUMAN;tr|H0Y400|H0Y400_HUMAN	FALSE	50360624	37953344	43933764	38200200	47288380	37478508	0
tr|F8VR69|F8VR69_HUMAN	FALSE	27985120	36304740	36469824	27527504	47614072	43950356	0.000980392
tr|C9JIJ5|C9JIJ5_HUMAN	FALSE	64109612	50658292	58078808	55196204	69810240	51409676	0.00160128
tr|F8WCH0|F8WCH0_HUMAN	FALSE	1086231936	859547520	949030144	911280640	1183064576	906790912	0.000980392
sp|P07737|PROF1_HUMAN	FALSE	382190816	321201920	362046272	343573088	436923136	330392672	0
sp|P61081|UBC12_HUMAN	FALSE	18137088	15562920	17784334	15459062	19286756	16938526	0.000980392
sp|P23246-2|SFPQ_HUMAN	FALSE	15463173	21860852	28973188	41485312	33848644	45427448	0.00160128
sp|P62888|RL30_HUMAN;tr|E5RI99|E5RI99_HUMAN	FALSE	56319128	40158560	56261680	62713700	77694896	56822376	0
sp|P63241|IF5A1_HUMAN;tr|I3L504|I3L504_HUMAN;sp|P63241-2|IF5A1_HUMAN;tr|I3L397|I3L397_HUMAN	FALSE	55402064	35159168	54251844	38444800	54668072	40274404	0
tr|F8W835|F8W835_HUMAN	FALSE	120052096	75163528	111923120	94693360	126963112	99436976	0
tr|B5MEG9|B5MEG9_HUMAN	FALSE	8874655	9141281	9384403	5.68878e+06	6843532	4969873	0.003885
tr|D6RBK0|D6RBK0_HUMAN	FALSE	36319228	27340516	34546008	27164160	36800612	23437924	0.000980392
tr|F5H1U3|F5H1U3_HUMAN	FALSE	84635464	150699328	166587472	127254336	214987216	155690896	0
tr|J3KSW7|J3KSW7_HUMAN;tr|J3QQV5|J3QQV5_HUMAN	FALSE	28826534	22892506	25105252	25191484	34061712	25288848	0.000980392
sp|P25398|RS12_HUMAN	FALSE	235156304	270123200	321228896	282338240	384835520	311901280	0
sp|O95817|BAG3_HUMAN;tr|C9JFK9|C9JFK9_HUMAN	FALSE	6.27178e+06	6.91854e+06	8918034	5598903	10509486	7.37486e+06	0.00160128
tr|H0YFG2|H0YFG2_HUMAN	FALSE	22617376	31810218	23529858	46381868	41303608	17263352	0
sp|P0CG39|POTEJ_HUMAN	FALSE	75757104	218424992	278733440	216218256	329494528	286674944	0.00160128
sp|P30536|TSPO_HUMAN;tr|B1AH87|B1AH87_HUMAN	FALSE	10357484	13402314	14770880	10544421	16180382	13807765	0.000980392
sp|P62241|RS8_HUMAN;tr|Q5JR95|Q5JR95_HUMAN	FALSE	243275904	237712032	216054368	275881568	371027200	284360608	0
sp|Q9H307|PININ_HUMAN	FALSE	3.10381e+06	5706279	5.34192e+06	5395507	7784212	5728368	0.000980392
sp|P07954|FUMH_HUMAN;sp|P07954-2|FUMH_HUMAN	FALSE	86432112	94428304	117092120	87639696	140800688	105679632	0.000980392
sp|Q9BVP2|GNL3_HUMAN;sp|Q9BVP2-2|GNL3_HUMAN	FALSE	41570952	22823388	35075168	28297898	44481316	29146964	0.00160128
sp|Q14019|COTL1_HUMAN	FALSE	33816232	19079472	29132750	24627906	31271928	21409346	0.000980392
sp|P42766|RL35_HUMAN	FALSE	65482284	42593932	49783712	45700808	73965608	52558312	0
tr|Q5T7C4|Q5T7C4_HUMAN	FALSE	57531572	77231760	94064544	54592360	107408608	81799944	0.000980392
tr|B8ZZL8|B8ZZL8_HUMAN	FALSE	170965632	115415144	140687824	118290016	157448256	120739616	0
sp|Q9Y230|RUVB2_HUMAN;sp|Q9Y230-2|RUVB2_HUMAN;tr|M0R0Y3|M0R0Y3_HUMAN	FALSE	43869496	13879474	17677524	8.28705e+06	15067584	13169852	0
sp|Q9Y2W2|WBP11_HUMAN	FALSE	3.1439e+06	4062106	3.37989e+06	3.35971e+06	4.68486e+06	3007654	0.000980392
sp|Q13509|TBB3_HUMAN	FALSE	4137870	2.20484e+06	3.96607e+06	3.36529e+06	6154638	4423188	0.00160128
sp|P10606|COX5B_HUMAN	FALSE	33867464	30674876	36611276	18463936	21632392	13167010	0
sp|P27816-5|MAP4_HUMAN;tr|F8W9U4|F8W9U4_HUMAN;sp|P27816-4|MAP4_HUMAN;tr|H0Y2V1|H0Y2V1_HUMAN;tr|H7C4C5|H7C4C5_HUMAN	FALSE	39088356	46076868	49725772	45283792	61849456	34379088	0.00160128
sp|A6NNZ2|TBB8L_HUMAN	FALSE	19629238	30002738	47763172	22967088	34300340	39565612	0.003885
tr|A0A2R8YDH3|A0A2R8YDH3_HUMAN;sp|O15523-2|DDX3Y_HUMAN;sp|O15523|DDX3Y_HUMAN	FALSE	16104875	10395184	12499759	12811259	11929197	9526840	0.000980392
tr|G3V3R4|G3V3R4_HUMAN;tr|G3V2R8|G3V2R8_HUMAN;tr|G3V5W4|G3V5W4_HUMAN;tr|G3V2N6|G3V2N6_HUMAN	FALSE	15486728	15075889	11231748	8056883	26324378	13078998	0.000980392
sp|P07237|PDIA1_HUMAN	FALSE	63712800	57415608	63702312	58059264	79788760	58191704	0
sp|P80723|BASP1_HUMAN	FALSE	86890568	61558684	68125840	58669560	80312032	57168160	0
tr|F8WE04|F8WE04_HUMAN	FALSE	113311336	138159312	160665152	144896192	188554800	150579776	0
tr|D6R991|D6R991_HUMAN	FALSE	25729348	42208740	37383236	30654006	39451320	30069842	0.000980392
sp|Q15758|AAAT_HUMAN	FALSE	12203676	4.81926e+06	4907586	4.76788e+06	0	3633451	0.00540123
sp|P08243|ASNS_HUMAN;sp|P08243-3|ASNS_HUMAN;sp|P08243-2|ASNS_HUMAN	FALSE	7.25039e+06	7828441	11776166	9823905	9422512	10190032	0.000980392
tr|Q5JNZ6|Q5JNZ6_HUMAN	FALSE	20202394	35351028	53025676	39959328	63786324	54264980	0.00160128
tr|H0YNA0|H0YNA0_HUMAN	FALSE	53091800	37961872	44535928	43449320	58045296	43465708	0.000980392
sp|Q9NR30|DDX21_HUMAN;sp|Q9NR30-2|DDX21_HUMAN	FALSE	21894010	16603033	18921776	20639272	22034332	16238171	0
tr|A0A087WVQ9|A0A087WVQ9_HUMAN;sp|P68104-2|EF1A1_HUMAN	FALSE	5832723456	4409932800	5070135296	4173089792	5400734720	3911339008	0
tr|A0A0B4J1R6|A0A0B4J1R6_HUMAN	FALSE	1314046976	972165504	1160486784	1054118080	1335479296	1016547392	0
tr|B0YJC4|B0YJC4_HUMAN	FALSE	357993312	252650480	314994784	263331360	348880384	269643488	0
sp|Q92688-2|AN32B_HUMAN;sp|Q92688|AN32B_HUMAN	FALSE	55722252	58092992	62873708	74122856	69777328	58676540	0
sp|Q96A08|H2B1A_HUMAN	FALSE	123882400	135896112	162528656	121196256	161818480	120387744	0
sp|P68371|TBB4B_HUMAN	FALSE	63867832	69931920	72347272	74351440	103282304	77493072	0
tr|M0QZC5|M0QZC5_HUMAN	FALSE	173624160	131113120	143377952	131823792	158566704	126223968	0.000980392
sp|P62269|RS18_HUMAN	FALSE	87694944	73251352	94805232	75502544	104713792	78905416	0
sp|O00483|NDUA4_HUMAN	FALSE	10249549	9361807	10739188	11231153	10455494	11033712	0.000980392
sp|O43776|SYNC_HUMAN	FALSE	7.044e+06	4.44206e+06	6060022	7232712	6605674	2.55889e+06	0
sp|P62701|RS4X_HUMAN	FALSE	330212800	267250592	313948000	284317216	389961984	292873920	0
XXX_sp|P62140|PP1B_HUMAN	TRUE	41541152	54426644	35699752	66058936	44913288	1.27789e+06	0.00316957
tr|J3QL52|J3QL52_HUMAN	FALSE	32984156	19972180	16348134	14953997	17701786	12868621	0.000980392
sp|Q15785|TOM34_HUMAN	FALSE	5.68249e+06	5432658	5036767	4486504	5.90654e+06	5.54234e+06	0
tr|B9ZVP7|B9ZVP7_HUMAN	FALSE	81180544	67818568	80004152	79234272	100326640	79277544	0
tr|J3QR48|J3QR48_HUMAN	FALSE	54968168	45267352	42819728	37527364	47030664	33017466	0.000980392
tr|F8W1K8|F8W1K8_HUMAN	FALSE	120899992	112415472	91656504	75654736	100185256	80874824	0.000980392
tr|A0A1B0GVG8|A0A1B0GVG8_HUMAN	FALSE	111287688	119776128	131313384	128286824	177386176	147871248	0
tr|D6RFM5|D6RFM5_HUMAN	FALSE	60080884	45283860	73240872	63244288	73992712	59428796	0
tr|C9J3N8|C9J3N8_HUMAN	FALSE	118863272	93932640	116424688	110343664	135316432	99662776	0
sp|P26373-2|RL13_HUMAN	FALSE	48761824	42776652	43615320	35209260	47052944	38766988	0.000980392
tr|G3V2A3|G3V2A3_HUMAN	FALSE	240755168	209132288	237166368	211665040	289823744	209559872	0
sp|P16152|CBR1_HUMAN	FALSE	36713320	26194334	32904442	30265696	37977956	30927894	0.000980392
sp|O94776-2|MTA2_HUMAN;sp|O94776|MTA2_HUMAN	FALSE	6811894	0	6518771	0	7085865	1.07659e+06	0.003885
tr|J3KSS0|J3KSS0_HUMAN	FALSE	22328708	46386724	64180288	44971480	72932304	57672564	0.000980392
sp|Q12874|SF3A3_HUMAN	FALSE	12715401	7.60117e+06	10137301	8713540	12130156	9222584	0.000980392
sp|P07814|SYEP_HUMAN	FALSE	74566592	71289352	75555136	72021856	95801080	69948472	0.000980392
XXX_sp|Q8N6M0|OTU6B_HUMAN;XXX_tr|A0A087X0W9|A0A087X0W9_HUMAN;XXX_sp|Q8N6M0-2|OTU6B_HUMAN	TRUE	53292128	68065712	85420088	56821264	93772152	67977592	0.00988593
sp|P23588-2|IF4B_HUMAN	FALSE	36557612	28825136	40066436	29705718	43387528	35309156	0.000980392
tr|E7ESH4|E7ESH4_HUMAN	FALSE	235049248	156377984	190518368	170207584	217311056	164488928	0
tr|H7C3M2|H7C3M2_HUMAN	FALSE	41393152	61925048	67399856	57176316	76279176	54237504	0.00160128
tr|A0A1W2PPE9|A0A1W2PPE9_HUMAN	FALSE	104982712	71987616	102314800	79597864	110938704	96301560	0.00160128
sp|P45880-1|VDAC2_HUMAN;tr|A0A0A0MR02|A0A0A0MR02_HUMAN;sp|P45880|VDAC2_HUMAN;sp|P45880-2|VDAC2_HUMAN	FALSE	164847312	112045816	136514832	116844752	153811072	125897544	0
tr|H3BM89|H3BM89_HUMAN	FALSE	294440256	171525456	208471008	176507328	233332816	175237248	0
sp|Q96P70|IPO9_HUMAN	FALSE	4438669	1.91243e+06	3.88282e+06	2.53236e+06	3.97071e+06	2.94601e+06	0.00160128
sp|P13639|EF2_HUMAN	FALSE	2349114880	2184852480	2449797888	2363076352	2824736256	2440564480	0
tr|X6RJP6|X6RJP6_HUMAN	FALSE	125751848	95079584	119624912	121244728	162645424	113755872	0.000980392
sp|P30049|ATPD_HUMAN	FALSE	10527797	6518034	6.68429e+06	4739454	10400920	9202073	0
sp|P07205|PGK2_HUMAN	FALSE	21617660	78457168	60432588	139416640	197054640	146215584	0.000980392
tr|F2Z3C0|F2Z3C0_HUMAN;tr|A8MXK4|A8MXK4_HUMAN	FALSE	13646838	9935950	10901598	9597762	13066989	8850363	0.000980392
tr|A0A1B0GTT5|A0A1B0GTT5_HUMAN	FALSE	311802304	239335776	290610208	290567744	380922688	283403392	0
sp|P35579|MYH9_HUMAN	FALSE	28106910	27346058	30644168	21437204	35787440	25909214	0
sp|P35637|FUS_HUMAN;sp|P35637-2|FUS_HUMAN;tr|H3BPE7|H3BPE7_HUMAN	FALSE	104568824	93251816	109773416	81167736	118106352	97736968	0
tr|M0R0K9|M0R0K9_HUMAN	FALSE	21532980	19090166	16230375	21036784	19677050	20928216	0.000980392
sp|Q9Y265-2|RUVB1_HUMAN;sp|Q9Y265|RUVB1_HUMAN	FALSE	30113906	23181886	27278222	21801272	29506662	24710352	0
tr|M0QY67|M0QY67_HUMAN	FALSE	31164894	20617178	28433118	21002396	31258484	22751870	0.000980392
tr|A0A087WTT1|A0A087WTT1_HUMAN;sp|P11940|PABP1_HUMAN;sp|P11940-2|PABP1_HUMAN	FALSE	4327497	6.89104e+06	6.97493e+06	5626121	8550216	7107147	0.000980392
tr|K7EQ48|K7EQ48_HUMAN	FALSE	48055456	65331400	67289424	56887928	78849176	53304224	0
tr|H7BZJ3|H7BZJ3_HUMAN	FALSE	39614684	117845872	41772588	119071872	39144896	133040000	0.000980392
tr|H7C2U0|H7C2U0_HUMAN	FALSE	37268160	26935702	38525336	34078180	48763460	39237188	0
tr|C9JL19|C9JL19_HUMAN	FALSE	77588512	69303920	70251960	68521976	90328200	69334912	0
tr|A8MUD9|A8MUD9_HUMAN	FALSE	189383968	183780720	199902064	214553616	253376928	240403872	0
sp|P21796|VDAC1_HUMAN	FALSE	119628944	105146480	129202520	126555768	182331808	125295424	0
sp|P07437|TBB5_HUMAN	FALSE	141251568	278537696	395567648	283321888	370332480	273723552	0.000980392
tr|E7ETR0|E7ETR0_HUMAN	FALSE	16951588	7821991	12025958	12824516	20117476	16782646	0.000980392
sp|P30050-2|RL12_HUMAN	FALSE	32411800	37558004	45351492	36376904	54785876	42003380	0.000980392
tr|H0YJG0|H0YJG0_HUMAN	FALSE	16670154	37531992	42059468	43648988	49418640	45376780	0
tr|B4DUR8|B4DUR8_HUMAN	FALSE	14795598	19226338	20103918	27366292	33369194	25867524	0.000980392
sp|P61970|NTF2_HUMAN;tr|H3BRV9|H3BRV9_HUMAN	FALSE	56023716	37325612	17954570	21532040	25287534	18801846	0.00160128
tr|A0A0B4J213|A0A0B4J213_HUMAN	FALSE	2.947e+06	18396250	23386534	36993372	58900624	48546760	0.00160128
sp|P28072|PSB6_HUMAN	FALSE	35773704	29830276	27499010	24922828	34350656	26843416	0.00160128
sp|Q8N0Y7|PGAM4_HUMAN	FALSE	66698456	49037172	54091868	45682228	60048980	45950544	0.000980392
sp|P02545-5|LMNA_HUMAN;sp|P02545-4|LMNA_HUMAN	FALSE	24895684	23433676	31264746	34171504	41175204	31243788	0
tr|F5GZ03|F5GZ03_HUMAN	FALSE	32735984	33379756	36897296	27447506	40270944	31411992	0
sp|P31327-3|CPSM_HUMAN;sp|P31327|CPSM_HUMAN	FALSE	395731680	324960416	385825056	326746176	456956928	348278816	0
tr|D6R9L0|D6R9L0_HUMAN;tr|D6R9Z1|D6R9Z1_HUMAN	FALSE	8204599	12826035	18329940	17887646	20149214	16589831	0.00160128
tr|H0YEU5|H0YEU5_HUMAN	FALSE	11431261	8895870	10192116	9397439	11707880	9301601	0.000980392
sp|P05386|RLA1_HUMAN	FALSE	145519024	109868304	123791992	100415264	126227680	95135544	0
sp|P25705-2|ATPA_HUMAN;sp|P25705|ATPA_HUMAN	FALSE	76108680	65474592	87336528	86875984	103152408	83133352	0.000980392
sp|Q7KZF4|SND1_HUMAN	FALSE	15078166	11812776	19069518	14647200	18394554	13478692	0.00160128
sp|Q58FF8|H90B2_HUMAN	FALSE	701478720	561646336	681325120	551591744	788733568	568425472	0
sp|P20618|PSB1_HUMAN	FALSE	4.96604e+06	6.78906e+06	10099156	7.92443e+06	11933452	8.07647e+06	0.00160128
sp|P27348|1433T_HUMAN	FALSE	11203899	8702312	11085239	7.09975e+06	10726269	8745690	0.000980392
sp|Q9BTM1-2|H2AJ_HUMAN	FALSE	129833000	105619928	135093040	137965792	172645568	129244264	0
tr|Q5T8U3|Q5T8U3_HUMAN	FALSE	218278016	154792864	181284208	155208624	195515408	150788704	0
sp|Q9Y490|TLN1_HUMAN	FALSE	3.39876e+06	3.82822e+06	2.63713e+06	4.36602e+06	5.26775e+06	3.73142e+06	0.00160128
tr|A0A075B6E2|A0A075B6E2_HUMAN	FALSE	53322264	7650073	47370712	38463216	55508800	42371292	0.000980392
sp|Q14566|MCM6_HUMAN	FALSE	7.29647e+06	4891759	5.49547e+06	6.23589e+06	7008604	5487960	0.00465477
sp|P78371-2|TCPB_HUMAN	FALSE	9737402	26137306	33117504	18755152	42680124	30599948	0
sp|P04350|TBB4A_HUMAN	FALSE	19835872	23451228	25915548	55383888	59389340	47626420	0.000980392
sp|Q9Y266|NUDC_HUMAN	FALSE	19010482	20179266	21635186	15890271	27418296	26229954	0
sp|P49703|ARL4D_HUMAN	FALSE	0	12119229	13818801	12693923	18002856	11006886	0.00316957
sp|Q15365|PCBP1_HUMAN	FALSE	194996496	149366064	182342768	163138576	233393840	165724816	0
sp|P09429|HMGB1_HUMAN	FALSE	7.60693e+06	6174137	7.15654e+06	4946038	7.41909e+06	6181317	0.000980392
sp|O14556|G3PT_HUMAN	FALSE	1439017728	971537408	1176077952	1014136256	1275168896	930648320	0.000980392
sp|P15880|RS2_HUMAN;tr|H0YEN5|H0YEN5_HUMAN	FALSE	59197720	48186052	56755016	48732584	62014360	51063120	0.00160128
tr|A0A024R4M0|A0A024R4M0_HUMAN;sp|P46781|RS9_HUMAN	FALSE	74850248	56208496	61980156	55071392	75266176	64851752	0
tr|E5RGV0|E5RGV0_HUMAN	FALSE	136918368	96806368	117929840	109251384	143242688	100693344	0
sp|O14818|PSA7_HUMAN;tr|H0Y586|H0Y586_HUMAN;sp|O14818-2|PSA7_HUMAN	FALSE	131363744	103160440	126577864	107726144	146499792	135408736	0
tr|M0QZM1|M0QZM1_HUMAN	FALSE	21375226	18802380	21417270	19598496	28331258	17239800	0.00160128
tr|F8VRZ4|F8VRZ4_HUMAN;tr|F8VS66|F8VS66_HUMAN	FALSE	199798608	147829856	173515680	145001200	187208336	142362048	0.000980392
sp|O00299|CLIC1_HUMAN	FALSE	151932256	115566952	134235200	135192848	163391344	128265560	0
sp|P12236|ADT3_HUMAN	FALSE	133167464	102405136	128757968	111359904	143501888	115465840	0.000980392
tr|F8VZ49|F8VZ49_HUMAN	FALSE	37182776	57155736	55040768	37621920	66155584	50077168	0
tr|S4R3N1|S4R3N1_HUMAN	FALSE	77938272	55612928	75512352	63737108	83604616	59352220	0
sp|P13987|CD59_HUMAN;tr|E9PNW4|E9PNW4_HUMAN;tr|A0A2U3TZL5|A0A2U3TZL5_HUMAN;sp|P13987-2|CD59_HUMAN	FALSE	15825518	14379034	16744703	14429537	23129924	15107080	0
tr|A0A2R8Y660|A0A2R8Y660_HUMAN	FALSE	163587504	220084896	269087040	197003408	307571136	234528112	0
tr|E7ENU7|E7ENU7_HUMAN	FALSE	28836776	79936456	77908288	51993884	97969768	78613640	0
tr|M0R2T0|M0R2T0_HUMAN	FALSE	7256204	6549392	8252302	4815917	8621034	6.68089e+06	0
tr|H0YMI6|H0YMI6_HUMAN	TRUE	15301212	11298306	12490098	11535652	14696732	9424266	0.000980392
sp|P08727|K1C19_HUMAN;tr|C9JM50|C9JM50_HUMAN	FALSE	78603824	49429468	69309704	66327676	82540296	59740992	0.000980392
tr|E7EMV8|E7EMV8_HUMAN	FALSE	64924968	52532164	54456352	51973652	67881528	49741904	0.000980392
tr|H0Y5F5|H0Y5F5_HUMAN	FALSE	4.14205e+06	4277291	4809316	4.21181e+06	6260827	4.96496e+06	0
sp|Q01082-3|SPTB2_HUMAN;sp|Q01082-2|SPTB2_HUMAN	FALSE	9634552	6791993	7.45808e+06	5931053	10083068	6673175	0.000980392
sp|P06576|ATPB_HUMAN	FALSE	234563312	219161584	278810144	199268800	294508000	233828208	0
sp|P11021|BIP_HUMAN	FALSE	656387392	489291840	608324736	529227168	715587904	542804352	0
tr|F5GXY2|F5GXY2_HUMAN;tr|F5GYU2|F5GYU2_HUMAN	FALSE	193028336	134325808	179176320	148336800	200193056	161199792	0
sp|P63000-2|RAC1_HUMAN;sp|P63000|RAC1_HUMAN	FALSE	9881365	18647894	26891368	22884206	23075754	28953112	0.00160128
sp|P22626-2|ROA2_HUMAN	FALSE	78868536	66408136	71325104	82697480	114149016	76274992	0
sp|P60709|ACTB_HUMAN;sp|P63261|ACTG_HUMAN	FALSE	287213760	242128192	325255040	297193184	416535712	322064608	0
sp|P36578|RL4_HUMAN	FALSE	126545712	121432880	153978928	116283016	168487104	129154392	0
sp|P48741|HSP77_HUMAN	FALSE	212829360	242390560	269236384	271898368	340277120	272390464	0.000980392
tr|H0YMV3|H0YMV3_HUMAN	FALSE	41128116	38508644	47078844	36305324	38839572	25712434	0.00160128
sp|P31327-2|CPSM_HUMAN	FALSE	358842848	317550112	307529536	265160896	323844160	255104864	0
tr|I3L0K7|I3L0K7_HUMAN	FALSE	50909832	39655652	42496620	46082848	51827432	41835072	0.00160128
sp|P63267-2|ACTH_HUMAN	FALSE	902412224	653098368	778153600	624921472	861118976	648052480	0
sp|Q969H8|MYDGF_HUMAN	FALSE	19742392	21431838	23776648	21777752	31540480	21317276	0
tr|H0YLE8|H0YLE8_HUMAN	FALSE	26172982	20535780	31000024	29687994	36363024	27734572	0.000980392
tr|H0Y3Z3|H0Y3Z3_HUMAN	FALSE	85421104	67214520	79989568	64869268	89701688	64361144	0.000980392
sp|P50990-2|TCPQ_HUMAN	FALSE	8700065	9868525	10792489	10902607	2.34051e+06	4.57523e+06	0.000980392
sp|P78527-2|PRKDC_HUMAN;sp|P78527|PRKDC_HUMAN	FALSE	62722428	73950728	66114412	50687140	73381000	63846680	0.000980392
sp|Q09666|AHNK_HUMAN	FALSE	130134904	89387048	115526696	91273104	113253120	91474936	0
tr|E9PQX2|E9PQX2_HUMAN	FALSE	45510252	35504764	43123724	35103784	27500072	17678010	0
tr|F2Z2S8|F2Z2S8_HUMAN;tr|H0YCJ7|H0YCJ7_HUMAN	FALSE	29878856	19867808	23286378	19770552	27190008	18551488	0.00988593
tr|A0A0D9SF20|A0A0D9SF20_HUMAN	FALSE	11691125	16752846	19729608	16500544	23359544	19632058	0.000980392
sp|P19338|NUCL_HUMAN	FALSE	754360128	609361344	716169728	679178368	888740736	667339008	0
sp|P60174-4|TPIS_HUMAN	FALSE	679421824	478159744	574114816	488532992	668543744	504186976	0
tr|H7C3T4|H7C3T4_HUMAN	FALSE	22159020	16252867	18448454	16507615	25270864	15662213	0.000980392
sp|P18669|PGAM1_HUMAN	FALSE	121578048	132369872	150867296	128323136	175270976	138807136	0
sp|Q99832-2|TCPH_HUMAN	FALSE	13641298	20369400	28811004	39850184	50584416	36795672	0.000980392
sp|P62266|RS23_HUMAN	FALSE	55131616	42510528	51757140	43656492	57174952	43759092	0.000980392
tr|K7EM90|K7EM90_HUMAN	FALSE	461873216	613371584	715223232	662809216	975038976	762550464	0
tr|K7EPF6|K7EPF6_HUMAN	FALSE	23690602	21182870	23987272	20733524	34253456	23243490	0.000980392
tr|H0YLE2|H0YLE2_HUMAN	FALSE	18761448	18794570	18424124	18628242	28134336	16886128	0.000980392
tr|E5RJB9|E5RJB9_HUMAN	FALSE	13310706	14382068	13331002	13712610	16338462	12166573	0
tr|E9PN89|E9PN89_HUMAN	FALSE	24837944	15719800	20504156	23208766	26597660	16926586	0
tr|F8W888|F8W888_HUMAN	FALSE	127639128	104699104	112179728	121262560	145129792	161284608	0.000980392
tr|H3BTN5|H3BTN5_HUMAN	FALSE	35600516	31412030	39708868	41595448	43870440	35718784	0.000980392
sp|O43707|ACTN4_HUMAN	FALSE	98029896	86440792	115991208	97303648	134407456	97764496	0
tr|B4DLN1|B4DLN1_HUMAN	FALSE	14714303	12044680	14713017	11802100	15460207	12191409	0.000980392
tr|H0YBG7|H0YBG7_HUMAN;tr|H0YBD7|H0YBD7_HUMAN	FALSE	43329452	73723712	75394768	108405288	141116192	107916432	0.00160128
tr|D6RDI0|D6RDI0_HUMAN	FALSE	29559452	16822452	38286036	38666212	30440608	51645388	0.00160128
sp|P62277|RS13_HUMAN	FALSE	39950148	11638682	43026688	41406576	48377316	35167272	0
sp|P49327|FAS_HUMAN	FALSE	673510848	876560832	983691584	786296896	1153376896	904761472	0
tr|M0R2D3|M0R2D3_HUMAN	FALSE	146779392	300002112	299473024	336557120	376403136	316609792	0.00160128
sp|P38159-3|RBMX_HUMAN;tr|H3BR27|H3BR27_HUMAN	FALSE	9061846	5.19857e+06	7.81224e+06	6579925	8334314	5.76712e+06	0
tr|E5RIT6|E5RIT6_HUMAN;sp|Q9UNX3|RL26L_HUMAN	FALSE	51530688	33323708	43013040	32874306	46906668	33256306	0.000980392
sp|P62330|ARF6_HUMAN	FALSE	0	12119229	13818801	12693923	18002856	11006886	0.00316957
sp|P22090|RS4Y1_HUMAN;tr|C9JEH7|C9JEH7_HUMAN	FALSE	32469866	68123680	81202136	56265440	90766752	72620248	0.000980392
tr|F8WF65|F8WF65_HUMAN	FALSE	19704514	17115338	22893968	24004164	32865912	20056744	0
tr|Q5JSD2|Q5JSD2_HUMAN;tr|Q5JSD1|Q5JSD1_HUMAN	FALSE	32523338	34610864	16236497	9082016	12180132	10252341	0.000980392
sp|P60900-2|PSA6_HUMAN	FALSE	11219045	13785775	18291806	13499804	17793574	13635538	0
sp|P06748-3|NPM_HUMAN	FALSE	289164416	473964352	570135552	534941536	760788928	574035392	0
sp|P39019|RS19_HUMAN	FALSE	36359812	36294672	49506848	44484936	60841344	44093380	0
sp|Q01082|SPTB2_HUMAN;tr|A0A087WUZ3|A0A087WUZ3_HUMAN	FALSE	614469	1.16173e+06	2.00278e+06	1068549	2.41301e+06	1.74694e+06	0.00160128
sp|Q08211|DHX9_HUMAN	FALSE	127115424	106933616	119764664	96747448	135298880	100949136	0.000980392
tr|A0A286YF78|A0A286YF78_HUMAN	FALSE	93087176	73530536	92364864	83155728	108131984	83320992	0.00160128
tr|K7EP01|K7EP01_HUMAN	FALSE	642783616	517187104	626451520	520519712	697346432	553922368	0.000980392
sp|Q96AG4|LRC59_HUMAN	FALSE	52037460	66249224	69340440	69183696	126852272	68720696	0
sp|P07900-2|HS90A_HUMAN;sp|P07900|HS90A_HUMAN	FALSE	1363449344	1280161920	1606781312	1427550720	1945895680	1521299072	0
tr|E7EQG2|E7EQG2_HUMAN;sp|Q14240-2|IF4A2_HUMAN;sp|Q14240|IF4A2_HUMAN	FALSE	96757296	66621048	85191656	70514760	90030344	59199972	0
tr|F8VRK0|F8VRK0_HUMAN	FALSE	445213120	358178688	389149824	363659488	477928224	368934400	0
sp|O14957|QCR10_HUMAN	FALSE	1.73929e+06	818214	1.28859e+06	978530	1655461	1.06024e+06	0.00988593
tr|V9GZ37|V9GZ37_HUMAN	FALSE	64148284	90846712	102782576	87792552	110224000	83853800	0
sp|O60506-5|HNRPQ_HUMAN	FALSE	94553320	57754448	77234480	58040844	91010248	62260304	0
tr|C9J4V0|C9J4V0_HUMAN;tr|C9J4S4|C9J4S4_HUMAN;tr|C9J8S3|C9J8S3_HUMAN	FALSE	17227204	13587346	16025114	11690954	17470054	10561955	0.000980392
tr|E9PMU7|E9PMU7_HUMAN;tr|E9PN18|E9PN18_HUMAN	FALSE	13247309	15038658	11715807	14573134	15880508	15198317	0.000980392
sp|Q9UMS4|PRP19_HUMAN;tr|F5GY56|F5GY56_HUMAN	FALSE	1.12412e+06	5514307	8.21939e+06	3.29812e+06	9559147	5492308	0.003885
sp|P63313|TYB10_HUMAN	FALSE	55659400	38167572	51750428	57532520	69920848	53195656	0
tr|Q5ST81|Q5ST81_HUMAN	FALSE	1163190144	849925120	1044286976	935736512	1166124160	904657664	0
tr|I3L312|I3L312_HUMAN	FALSE	91862856	68169472	105057848	102088192	115424960	81966552	0
sp|P42704|LPPRC_HUMAN	FALSE	64768832	54483424	63728648	56665344	71971120	54602832	0
tr|E9PS23|E9PS23_HUMAN	FALSE	316601024	247945312	266323232	271671360	357415424	267737840	0
sp|Q9NR31|SAR1A_HUMAN;sp|Q9Y6B6|SAR1B_HUMAN	FALSE	13584868	9949780	13755460	12271343	17204564	13959116	0
tr|J3KS60|J3KS60_HUMAN	FALSE	14748078	11900449	14302091	12239805	11565974	10223252	0.00160128
tr|H0Y9R4|H0Y9R4_HUMAN	FALSE	47804016	28534008	31739120	27448534	38958628	26834854	0
sp|P49411|EFTU_HUMAN	FALSE	145764944	131529912	155118032	148490240	188767728	143501040	0.000980392
sp|P04406-2|G3P_HUMAN;tr|E7EUT5|E7EUT5_HUMAN	FALSE	1643196032	2307734528	2760016128	2390498816	3277523456	2697076224	0
sp|O95757|HS74L_HUMAN;tr|E9PDE8|E9PDE8_HUMAN	FALSE	26650652	16049057	22370836	17776552	23431622	16418581	0.00160128
sp|P46778|RL21_HUMAN	FALSE	42677248	35130064	38726416	33569048	45838708	32225166	0
sp|P17987|TCPA_HUMAN	FALSE	36827612	32913176	39871552	37584380	46515456	38086860	0
tr|E9PG15|E9PG15_HUMAN	FALSE	201872336	147749968	176713232	184848928	238083040	206347696	0
tr|H0YGF3|H0YGF3_HUMAN	FALSE	30937612	28603568	25522446	24805080	36742604	25581394	0
sp|P16435|NCPR_HUMAN	FALSE	21222812	12920500	16865326	11924044	21265178	12997176	0.000980392
tr|E9PNE6|E9PNE6_HUMAN	FALSE	257749008	340214016	411390784	327146560	490739456	368145600	0
sp|P23284|PPIB_HUMAN	FALSE	315964704	253704624	290365792	244686736	326490080	262215328	0
sp|P09669|COX6C_HUMAN	FALSE	47327232	28937482	41209036	39421856	48896332	41300884	0.000980392
sp|Q9UK76-2|JUPI1_HUMAN;sp|Q9UK76|JUPI1_HUMAN;tr|J3KT51|J3KT51_HUMAN	FALSE	38573168	28612650	35176668	35598528	39707244	40753328	0.000980392
sp|Q8NBS9-2|TXND5_HUMAN;sp|Q8NBS9|TXND5_HUMAN	FALSE	10561620	8.26421e+06	10133847	8852006	16898700	10211617	0.000980392
sp|Q15393|SF3B3_HUMAN	FALSE	2.56067e+06	3.16521e+06	3.53523e+06	3.15303e+06	5050527	2808304	0.00160128
sp|P38159-2|RBMX_HUMAN	FALSE	8625842	8.14541e+06	9421674	6.8534e+06	8521338	6.50209e+06	0.000980392
sp|P62805|H4_HUMAN	FALSE	1460697088	1148691712	1374138240	1232325120	1546829696	1180096128	0
sp|Q14974|IMB1_HUMAN	FALSE	76898088	65138232	74164824	71436632	86533824	70086520	0
tr|F8VZY9|F8VZY9_HUMAN	FALSE	651112128	511289408	619714944	527273344	687478592	515050592	0
sp|P26038|MOES_HUMAN	FALSE	42341880	42038736	78042024	67886992	85584928	89833856	0.000980392
tr|F5H867|F5H867_HUMAN	FALSE	75696936	51076020	60604344	45112056	70971320	52391248	0
sp|P49368|TCPG_HUMAN	FALSE	64552604	86668064	101683008	77391328	96988064	83366104	0
tr|F5H783|F5H783_HUMAN	FALSE	31704794	31651196	32362808	28569934	43241260	30057678	0
sp|Q9H0C2|ADT4_HUMAN	FALSE	226746368	179041392	202000192	172210112	215289200	170334720	0
tr|D6RA73|D6RA73_HUMAN	FALSE	52931712	49755228	57882704	62811268	73515600	60666364	0
tr|Q8J015|Q8J015_HUMAN	FALSE	55435928	55009484	62899744	48574464	74546408	55489300	0
sp|P52907|CAZA1_HUMAN	FALSE	14202834	12199038	19916856	19825700	28258192	19851926	0
tr|I3L1Y5|I3L1Y5_HUMAN	FALSE	9758735	19406748	23662888	14236644	26533978	23583166	0
sp|P40227|TCPZ_HUMAN	FALSE	61993584	83319496	96232776	65653788	105762104	75795624	0
sp|P61353|RL27_HUMAN	FALSE	129554584	90192856	114449504	86390896	125726088	90286656	0
tr|K7EQH4|K7EQH4_HUMAN	FALSE	41113276	32717678	45274440	52460444	64629432	54097992	0.000980392
XXX_tr|D6R915|D6R915_HUMAN	TRUE	237612	10280485	12518257	13222735	3.22903e+06	450570	0.0091673
sp|Q9Y617|SERC_HUMAN	FALSE	37582328	27734068	27829344	27028460	37632996	23753830	0.000980392
tr|A0A2R8Y879|A0A2R8Y879_HUMAN	FALSE	80117040	60239108	77399112	58317916	95543456	69747736	0
sp|P61927|RL37_HUMAN	FALSE	1.26395e+06	1.96071e+06	2.36907e+06	1.86827e+06	2671118	1.96392e+06	0
tr|Q5T8U2|Q5T8U2_HUMAN	FALSE	30910590	35660344	40852316	45436608	54378480	48384888	0
tr|F8VXH9|F8VXH9_HUMAN	FALSE	143543536	117374248	136526336	125461280	168310704	133322640	0
tr|H0YM50|H0YM50_HUMAN	FALSE	19521864	32586160	33355258	33030842	40876360	34440748	0.000980392
tr|I3L4M2|I3L4M2_HUMAN	FALSE	74342208	56219344	64623168	55598104	73525696	55595508	0
tr|K7ENJ4|K7ENJ4_HUMAN	FALSE	96336000	78339496	96174584	80159280	117447600	77103856	0.000980392
sp|P63244|RACK1_HUMAN	FALSE	40861912	33774208	37786496	43352372	50346852	34498780	0
sp|Q58FG0|HS905_HUMAN	FALSE	342615040	292451104	321717408	274231392	374781632	271981760	0
tr|D6RAN4|D6RAN4_HUMAN;sp|P32969|RL9_HUMAN	FALSE	15886581	11410466	13365467	13128627	17611824	13002574	0.000980392
sp|Q9H853|TBA4B_HUMAN	FALSE	50583420	52627552	67339024	78643408	72782120	69332200	0.000980392
sp|P62328|TYB4_HUMAN	FALSE	201821136	172210368	189202736	147055888	189208608	124088264	0
tr|B8ZZK4|B8ZZK4_HUMAN	FALSE	19776976	29843276	39618824	28952296	45621184	35241484	0
sp|Q5JNZ5|RS26L_HUMAN	FALSE	219503456	141114912	183579088	154217312	193958816	140889808	0.000980392
tr|A0A087WUI2|A0A087WUI2_HUMAN	FALSE	78296464	113818456	148322944	99270800	162562560	141114496	0
sp|P16989|YBOX3_HUMAN	FALSE	4.09394e+06	2.87661e+06	3.83997e+06	3.32959e+06	4273126	3697487	0.000980392
tr|F8VP67|F8VP67_HUMAN	FALSE	94380656	82335736	99137376	90247616	110025840	86759536	0
tr|K7ELW0|K7ELW0_HUMAN	FALSE	216700224	160008640	195032880	169136048	236104160	190699424	0.000980392
sp|P78371|TCPB_HUMAN	FALSE	10801629	16046068	21964678	19604542	22497226	21396574	0
tr|A0A0C4DGC5|A0A0C4DGC5_HUMAN	FALSE	41755936	83583960	95492096	78535672	102530216	79859976	0
tr|F8WAM2|F8WAM2_HUMAN	FALSE	56779484	69219648	81384248	62079044	86069448	71142344	0
sp|P13489|RINI_HUMAN	FALSE	64850844	60653236	17712866	40570580	34758340	19281596	0
sp|P25705-3|ATPA_HUMAN	FALSE	100949824	97779168	115902552	103817032	106036856	90306360	0.000980392
sp|P08574|CY1_HUMAN	FALSE	4.51084e+06	8193825	9237719	6.66504e+06	10374001	7.38623e+06	0.00160128
tr|H0YH81|H0YH81_HUMAN	FALSE	184015936	150413440	163020464	163103408	213065632	162464576	0
sp|P84090|ERH_HUMAN	FALSE	57699772	40183944	68152512	39299104	55259512	42771244	0
sp|O15067|PUR4_HUMAN	FALSE	11023744	7401341	10961246	10353118	12139365	8353537	0.000980392
sp|P49368-2|TCPG_HUMAN	FALSE	109757888	81525120	96296640	86200816	111890168	90772256	0
sp|P50502|F10A1_HUMAN	FALSE	69574112	45061756	56666296	66001012	99699440	77707536	0.000980392
tr|A0A0C4DH44|A0A0C4DH44_HUMAN	FALSE	151173008	109078344	133609792	114156776	148192336	107460976	0.000980392
tr|X6RAC9|X6RAC9_HUMAN	FALSE	28856496	24192744	32944524	24711340	33721784	26686744	0.000980392
sp|P22392|NDKB_HUMAN	FALSE	4412110	2645524	3.38593e+06	1539595	2.95152e+06	2.82687e+06	0.000980392
tr|K7EIT4|K7EIT4_HUMAN	FALSE	142965664	111872120	126241160	106871952	136522976	106460544	0
tr|I3L3D5|I3L3D5_HUMAN	FALSE	198984368	187035008	208905968	197055968	255824400	186728192	0
sp|Q15427|SF3B4_HUMAN;tr|Q5SZ64|Q5SZ64_HUMAN	FALSE	10700504	7.51845e+06	9692545	8820888	13745780	8.16069e+06	0.00160128
tr|H0YMD9|H0YMD9_HUMAN	FALSE	31649172	20815148	22753968	20314464	31361516	24692736	0.000980392
tr|E9PKU7|E9PKU7_HUMAN	FALSE	32720870	19506066	26776304	16139993	24817046	15064157	0
sp|Q8TDN6|BRX1_HUMAN	FALSE	6988734	5.01956e+06	6083120	5.38443e+06	6700423	5360939	0.000980392
sp|P35268|RL22_HUMAN	FALSE	71239248	68483808	83392640	67424880	104439104	75794880	0.000980392
tr|H0YAR2|H0YAR2_HUMAN	FALSE	66177620	48747160	62660112	50905824	70370096	53580916	0
sp|P05455|LA_HUMAN	FALSE	75746760	46822136	56913356	48847620	67207464	56689188	0.00160128
tr|I3L3U6|I3L3U6_HUMAN	FALSE	16553767	12868158	16127158	15542705	18344388	13719606	0.000980392
tr|C9J7H8|C9J7H8_HUMAN	FALSE	22430234	10897381	19938470	16671963	20241356	16084298	0
tr|E7ESE0|E7ESE0_HUMAN	FALSE	39622564	40210552	53387560	55219816	75901496	58744608	0
sp|Q8NHW5|RLA0L_HUMAN	FALSE	37919448	35754644	43595028	29824066	49720772	43365036	0
sp|Q96L21|RL10L_HUMAN	FALSE	94518744	64560472	76752920	60771064	90242824	71657256	0
sp|O60664-2|PLIN3_HUMAN	FALSE	5135001	6.34543e+06	6515666	14068296	19530032	20536460	0.003885
tr|G3V4M8|G3V4M8_HUMAN	FALSE	55202172	68230008	69374160	101793016	135286496	98359464	0.000980392
tr|H7C044|H7C044_HUMAN	FALSE	6.62072e+06	7.90427e+06	10307520	9469789	11676875	9867836	0.00160128
sp|P14625|ENPL_HUMAN	FALSE	231624288	207909520	246520688	226976960	304400544	228891760	0
sp|Q58FF3|ENPLL_HUMAN	FALSE	68765456	74541728	95517872	82436688	109886568	82165264	0.00160128
sp|P63267|ACTH_HUMAN;sp|P62736|ACTA_HUMAN	FALSE	674458688	504913568	592321344	507977152	665373056	506114016	0
sp|Q07021|C1QBP_HUMAN	FALSE	13412076	42976332	42901556	48100484	20840800	7.6582e+06	0.00160128
tr|M0QZN2|M0QZN2_HUMAN	FALSE	24170154	29191668	31057624	29778242	39293608	33003146	0.000980392
tr|D6RD83|D6RD83_HUMAN	FALSE	59082376	50862292	63766928	56227284	73956768	51697272	0
tr|Q5T0R8|Q5T0R8_HUMAN;tr|Q5T0S3|Q5T0S3_HUMAN	FALSE	2.01885e+06	5463233	6.25097e+06	4.78607e+06	8.24148e+06	7.24597e+06	0.00160128
sp|P80723-2|BASP1_HUMAN	FALSE	282668416	198426768	266690992	275373024	331659296	266129520	0
tr|M0R076|M0R076_HUMAN	FALSE	13227845	12348139	14252480	11645125	13771177	10662329	0
sp|P06733-2|ENOA_HUMAN	FALSE	415571104	344244832	381930080	335195520	467651104	373815520	0
sp|P10809|CH60_HUMAN	FALSE	1013663104	799753920	954872192	869720896	1211102080	932822272	0
sp|P04406|G3P_HUMAN	FALSE	3136525312	2366526464	2837532416	2680931584	3513765632	2651238144	0
sp|P04843|RPN1_HUMAN	FALSE	24858050	15576390	19606392	20122986	22448008	14771758	0.000980392
sp|P07919|QCR6_HUMAN	FALSE	3359306	11476724	10911824	10271850	15457182	11037219	0.00160128
tr|K7EJ44|K7EJ44_HUMAN	FALSE	86425040	120274288	146878480	109073000	178486336	140521824	0
sp|P62851|RS25_HUMAN	FALSE	289085952	221865808	260748752	220801120	272136128	215506544	0
tr|A0A1W2PP35|A0A1W2PP35_HUMAN	FALSE	113919032	95071368	103107400	90565192	115753144	91160520	0
sp|P09234|RU1C_HUMAN;tr|A0A0A0MRR7|A0A0A0MRR7_HUMAN	FALSE	11858728	9629743	22856196	15927133	29115488	19712914	0
sp|P22234|PUR6_HUMAN;sp|P22234-2|PUR6_HUMAN	FALSE	82219992	83673216	95903104	71955712	111329808	85350968	0
tr|B4DNK4|B4DNK4_HUMAN	FALSE	1087426688	799164864	923763776	786512000	1020410304	771800320	0
tr|E7EQR6|E7EQR6_HUMAN	FALSE	39747408	28156276	38434616	45954656	59524960	42773504	0
tr|A6NIW5|A6NIW5_HUMAN	FALSE	31612926	19162142	32211870	31818680	48814432	37352988	0.000980392
tr|J3QRQ7|J3QRQ7_HUMAN	FALSE	23325538	18040194	23314174	19667732	19625304	12783685	0.00160128
sp|O00303|EIF3F_HUMAN	FALSE	7332326	6.72679e+06	6198253	5323596	6891974	6.00809e+06	0.000980392
sp|P62280|RS11_HUMAN	FALSE	39552616	26864304	31160300	29604136	53650552	35186976	0.000980392
tr|H7C4C8|H7C4C8_HUMAN	FALSE	91732312	72761488	100852376	83127048	111784912	78593904	0
tr|H0YLS6|H0YLS6_HUMAN	FALSE	10127107	12205262	12396023	10813575	13252136	14148962	0.00160128
tr|H0YCP8|H0YCP8_HUMAN	FALSE	13206654	10232957	13795416	11002478	11893993	8157751	0.000980392
tr|A0A3B3ITI4|A0A3B3ITI4_HUMAN	FALSE	8601528	6.52705e+06	8409851	7.86279e+06	8603707	6.88992e+06	0.000980392
sp|P31153|METK2_HUMAN	FALSE	31661434	23638492	33145768	24444104	34811860	27662246	0.000980392
sp|P34932|HSP74_HUMAN	FALSE	46296252	36317576	45405924	46839220	58151240	47994972	0
tr|H3BNU3|H3BNU3_HUMAN	FALSE	2.03968e+06	9475863	11669452	9542234	15705156	12432307	0.00160128
sp|Q99832-4|TCPH_HUMAN	FALSE	47382708	32342830	44655140	36429240	52245648	37977272	0.000980392
tr|M0R042|M0R042_HUMAN	FALSE	232816400	345635008	455713504	401529152	527537024	445388448	0
tr|J3KPD9|J3KPD9_HUMAN	FALSE	156118752	114705200	127699288	106974272	144008464	113609792	0.000980392
sp|P62424|RL7A_HUMAN	FALSE	69819912	55569596	56205668	60181428	85110728	57986720	0
tr|A0A0J9YYI8|A0A0J9YYI8_HUMAN	FALSE	23801012	17723532	21826030	21540080	24161400	17726396	0.00160128
sp|P62258-2|1433E_HUMAN	FALSE	116204344	114222856	120202520	127537824	175113328	127695560	0
sp|Q96QK1|VPS35_HUMAN	FALSE	18490082	19088026	21934954	18216208	21759346	15769582	0
tr|H0YBG6|H0YBG6_HUMAN	FALSE	62206940	47123312	53439184	56313504	73674416	58063240	0.000980392
tr|D6R9F8|D6R9F8_HUMAN	FALSE	47750824	39556108	45324008	55682440	67258752	58857052	0.000980392
sp|P00966|ASSY_HUMAN	FALSE	67012848	65378112	70115808	57046140	70245304	66693744	0
tr|I3L239|I3L239_HUMAN	FALSE	409761600	313055872	373649536	334986816	416234624	316451296	0.000980392
tr|E9PM13|E9PM13_HUMAN	FALSE	27904028	17724860	24467830	26897040	41636376	30599100	0.000980392
tr|F8WD59|F8WD59_HUMAN	FALSE	252726560	203331856	226988128	199289312	266695472	197518496	0
sp|P24534|EF1B_HUMAN	FALSE	174333776	132404456	127122216	108409680	150361072	104017912	0
tr|E5RI98|E5RI98_HUMAN	FALSE	1310548864	976665856	1104648192	960300096	1217302272	936671232	0.000980392
sp|O75347-2|TBCA_HUMAN	FALSE	25063820	20340874	23306772	21946054	24997928	21499398	0.000980392
sp|Q6ZNX1|SHLD3_HUMAN	FALSE	45686820	41793616	40623588	0	0	0	0.00614439
sp|P00403|COX2_HUMAN	FALSE	50182720	39190760	42233864	39218928	46776064	33814080	0.000980392
tr|H0Y8T4|H0Y8T4_HUMAN	FALSE	5.55162e+06	18974626	17628620	12944590	23956024	21845246	0
tr|Q8IWY7|Q8IWY7_HUMAN	FALSE	79114576	56029656	66843800	58607864	79248568	54015964	0
tr|A0A2R8YEA7|A0A2R8YEA7_HUMAN	FALSE	61274996	80746144	79873936	82476944	97111888	78571832	0.000980392
tr|Q5JP01|Q5JP01_HUMAN	FALSE	3.70833e+06	4.80872e+06	7149592	10067570	7172742	7.15426e+06	0.00160128
tr|F8WCR1|F8WCR1_HUMAN	FALSE	30540718	51364612	59942440	48667628	73768600	62205692	0
sp|P28070|PSB4_HUMAN	FALSE	36251564	34173732	42667872	26329918	31709020	16687742	0
tr|H0YIC4|H0YIC4_HUMAN	FALSE	56612428	38632808	30510932	24109396	31602510	25121522	0
sp|Q02878|RL6_HUMAN	FALSE	188777888	145104992	156446144	142261632	176057616	147451840	0
tr|G3XAL0|G3XAL0_HUMAN	FALSE	220729744	167418464	199635184	191294160	228893728	176766816	0
sp|P60228|EIF3E_HUMAN	FALSE	12328739	10138231	9922027	10704358	13709213	10884378	0
tr|F5GZI0|F5GZI0_HUMAN	FALSE	89437936	94623320	124333224	87676728	139002080	96100032	0

## Sheet: DE_1.5vs1
ProteinGroup	Decoy	Quantity_1	Quantity_2	Quantity_3	Quantity_4	Quantity_5	Quantity_6	QValue
sp|Q58FF8|H90B2_HUMAN	FALSE	106541128	64084416	106242448	61805916	89061896	48619540	0
sp|O60506|HNRPQ_HUMAN;sp|O60506-4|HNRPQ_HUMAN;sp|O60506-2|HNRPQ_HUMAN;sp|O60506-3|HNRPQ_HUMAN;tr|B7Z645|B7Z645_HUMAN	FALSE	10413803	6.9035e+06	10989271	6.91918e+06	12355061	7785860	0.00121951
sp|P37837|TALDO_HUMAN;tr|F2Z393|F2Z393_HUMAN	FALSE	10353492	15664104	9484614	1.19306e+06	3.16719e+06	1.35748e+06	0.00901917
tr|C9J2Q8|C9J2Q8_HUMAN;tr|G5E9K5|G5E9K5_HUMAN;sp|Q6P0N0|M18BP_HUMAN;sp|Q6P0N0-2|M18BP_HUMAN	FALSE	11530157	24062872	17624448	147548	2256067	4.33116e+06	0.00457666
tr|E7EP32|E7EP32_HUMAN;sp|Q9HAV0|GBB4_HUMAN;sp|P62879|GBB2_HUMAN;sp|P62879-2|GBB2_HUMAN;tr|C9JZN1|C9JZN1_HUMAN;tr|C9JIS1|C9JIS1_HUMAN;tr|H7C5J5|H7C5J5_HUMAN;tr|C9JXA5|C9JXA5_HUMAN	FALSE	3.38939e+06	1.95193e+06	3784353	1.65246e+06	3593423	1.8596e+06	0.00121951
sp|P50991-2|TCPD_HUMAN;sp|P50991|TCPD_HUMAN	FALSE	88964976	63341000	91305792	59000540	91129512	62895584	0
sp|P68104-2|EF1A1_HUMAN;tr|A0A087WVQ9|A0A087WVQ9_HUMAN	FALSE	699095296	450832832	697028672	359206080	614846272	370100480	0
tr|K7ENP6|K7ENP6_HUMAN;tr|A0A0G2JHN7|A0A0G2JHN7_HUMAN;tr|F6S2B7|F6S2B7_HUMAN;tr|F6R6M7|F6R6M7_HUMAN;tr|K7EL56|K7EL56_HUMAN;tr|A0A0G2JJL7|A0A0G2JJL7_HUMAN;tr|F6U6E2|F6U6E2_HUMAN;tr|F6SXL5|F6SXL5_HUMAN;tr|K7EIL8|K7EIL8_HUMAN;tr|K7EN69|K7EN69_HUMAN;tr|F6QYI9|F6QYI9_HUMAN	FALSE	26519744	14962057	29598208	14683248	24779478	16477891	0.00121951
tr|H7C3I1|H7C3I1_HUMAN;sp|Q8IZP2|ST134_HUMAN;tr|F6VDH7|F6VDH7_HUMAN;tr|Q3KNR6|Q3KNR6_HUMAN;sp|P50502|F10A1_HUMAN	FALSE	2.36828e+06	1.75506e+06	2688056	2233706	2.9051e+06	1.57014e+06	0.00121951
sp|Q15149-9|PLEC_HUMAN;sp|Q15149|PLEC_HUMAN;sp|Q15149-7|PLEC_HUMAN;sp|Q15149-4|PLEC_HUMAN;sp|Q15149-6|PLEC_HUMAN;sp|Q15149-3|PLEC_HUMAN;sp|Q15149-5|PLEC_HUMAN;sp|Q15149-2|PLEC_HUMAN;sp|Q15149-8|PLEC_HUMAN	FALSE	7071623	4430701	6.89711e+06	5.14273e+06	7.47354e+06	4343772	0
tr|C9J2C0|C9J2C0_HUMAN;sp|Q9NY65|TBA8_HUMAN;sp|Q9NY65-2|TBA8_HUMAN	FALSE	157507792	118462136	177472016	115235728	174012160	114715072	0
tr|H0YKZ7|H0YKZ7_HUMAN;tr|H0YKX9|H0YKX9_HUMAN;tr|H0YLV6|H0YLV6_HUMAN;tr|H0YMT9|H0YMT9_HUMAN	FALSE	9039334	4.9236e+06	8342203	4685781	8.33959e+06	5.21972e+06	0.00345622
sp|P40227|TCPZ_HUMAN	FALSE	41758724	24703586	45989972	26422436	42923892	24852266	0
sp|Q6PJI9-4|WDR59_HUMAN;sp|Q6PJI9|WDR59_HUMAN;sp|Q6PJI9-3|WDR59_HUMAN;tr|H3BNY4|H3BNY4_HUMAN	FALSE	29908828	17100248	40806212	23172786	33300846	8.24368e+06	0.00901917
tr|E9PKD5|E9PKD5_HUMAN;tr|E9PM69|E9PM69_HUMAN;tr|R4GNH3|R4GNH3_HUMAN;sp|P17980|PRS6A_HUMAN	FALSE	9012707	5261961	10219059	5.93834e+06	10067589	5.52886e+06	0
tr|B1AHC9|B1AHC9_HUMAN;sp|P12956|XRCC6_HUMAN;sp|P12956-2|XRCC6_HUMAN	FALSE	18888230	11436615	17303254	8688354	14072261	8494691	0
tr|F8W1G6|F8W1G6_HUMAN	FALSE	30515518	21256884	31699048	19269052	31394430	17727368	0
tr|G3V210|G3V210_HUMAN;tr|F8VRK7|F8VRK7_HUMAN;sp|Q8NHW5|RLA0L_HUMAN;tr|F8VQY6|F8VQY6_HUMAN	FALSE	11594973	6415624	10164182	4.37333e+06	9338833	4405270	0
tr|H3BN72|H3BN72_HUMAN;tr|H3BNV9|H3BNV9_HUMAN;tr|H3BPG0|H3BPG0_HUMAN;tr|Q86WV2|Q86WV2_HUMAN;sp|P13073|COX41_HUMAN	FALSE	6505658	3031736	6.39237e+06	3.30493e+06	6.13702e+06	3867186	0
tr|A0A2R8Y811|A0A2R8Y811_HUMAN;sp|P62263|RS14_HUMAN	FALSE	46328844	33647948	51566216	32344348	48402652	29889318	0
sp|P20674|COX5A_HUMAN	FALSE	10468778	4953068	9985841	4.9485e+06	8757427	5239146	0
tr|G3V2A3|G3V2A3_HUMAN	FALSE	97940440	62183348	99528360	62353380	107890808	56366432	0
tr|H0YB39|H0YB39_HUMAN	FALSE	15282029	12278422	20761396	14666892	22014942	17143256	0
tr|Q5SQT3|Q5SQT3_HUMAN;sp|Q9P0M6|H2AW_HUMAN	FALSE	6078582	37960012	45706524	35569412	51217360	8.13028e+06	0.00121951
sp|Q9P1Z2-4|CACO1_HUMAN;sp|Q9P1Z2-3|CACO1_HUMAN;sp|Q9P1Z2|CACO1_HUMAN;tr|H3BRW8|H3BRW8_HUMAN	FALSE	285097	5.53982e+06	5.70941e+06	5.63552e+06	352721	555354	0.00345622
tr|A0A1W2PS58|A0A1W2PS58_HUMAN;sp|Q6KB66-2|K2C80_HUMAN;sp|P14136-2|GFAP_HUMAN;sp|P14136|GFAP_HUMAN;sp|P19013|K2C4_HUMAN;tr|K7EMP8|K7EMP8_HUMAN;tr|A0A1W2PRT3|A0A1W2PRT3_HUMAN;tr|A0A1W2PQU7|A0A1W2PQU7_HUMAN;tr|A0A1W2PR46|A0A1W2PR46_HUMAN;sp|Q6KB66-3|K2C80_HUMAN;sp|Q6KB66|K2C80_HUMAN;tr|A0A1X7SCE1|A0A1X7SCE1_HUMAN;tr|K7EPI4|K7EPI4_HUMAN;tr|A0A1X7SBR3|A0A1X7SBR3_HUMAN;tr|K7EJU1|K7EJU1_HUMAN;sp|P14136…	FALSE	133546304	82266856	128697048	85048608	130661640	81201680	0.00121951
sp|Q14152-2|EIF3A_HUMAN;sp|Q14152|EIF3A_HUMAN	FALSE	694759	343479	553656	355146	588984	362206	0.00121951
tr|G3V1A1|G3V1A1_HUMAN;sp|P62917|RL8_HUMAN;tr|E9PKZ0|E9PKZ0_HUMAN	FALSE	25743300	19838930	26647350	16258155	24727380	16258421	0
sp|P10606|COX5B_HUMAN	FALSE	11885115	8660289	12766313	7126034	11161069	6690443	0.00121951
sp|P31327-2|CPSM_HUMAN	FALSE	44016696	23623042	36365812	14964354	32695010	21725508	0
sp|Q6DN03|H2B2C_HUMAN;sp|Q6DRA6|H2B2D_HUMAN	FALSE	76100976	48040396	76637744	55425680	81385968	52158340	0
tr|A0A2R8YE05|A0A2R8YE05_HUMAN;sp|P09493|TPM1_HUMAN;sp|P67936-2|TPM4_HUMAN;tr|H0YL80|H0YL80_HUMAN;tr|Q5TCU3|Q5TCU3_HUMAN;tr|H0YKX5|H0YKX5_HUMAN;tr|A0A0S2Z4G6|A0A0S2Z4G6_HUMAN;sp|P06753|TPM3_HUMAN;tr|K7ERG3|K7ERG3_HUMAN;tr|A0A2R8YH90|A0A2R8YH90_HUMAN;sp|P09493-4|TPM1_HUMAN;sp|P09493-5|TPM1_HUMAN;sp|P09493-3|TPM1_HUMAN;sp|P09493-7|TPM1_HUMAN;tr|H7BYY1|H7BYY1_HUMAN;sp|P09493-2|TPM1_HUMAN;tr|Q5TCU8|Q…	FALSE	36113480	25905288	40916012	22913614	34643780	20896078	0
tr|Q5T6W2|Q5T6W2_HUMAN;sp|P61978|HNRPK_HUMAN;sp|P61978-2|HNRPK_HUMAN;sp|P61978-3|HNRPK_HUMAN	FALSE	315591616	212605648	320359296	199454048	321452480	199483472	0
tr|A0A087X260|A0A087X260_HUMAN;sp|Q13148|TADBP_HUMAN;tr|B1AKP7|B1AKP7_HUMAN;tr|K7EJM5|K7EJM5_HUMAN;tr|A0A0A0MSV7|A0A0A0MSV7_HUMAN;tr|K7EJ99|K7EJ99_HUMAN;tr|A0A0A0N0M3|A0A0A0N0M3_HUMAN;tr|G3V162|G3V162_HUMAN;tr|A0A1W2PNU8|A0A1W2PNU8_HUMAN;tr|K7EN94|K7EN94_HUMAN;tr|A0A087WX29|A0A087WX29_HUMAN;tr|A0A087WYY0|A0A087WYY0_HUMAN	FALSE	1.60689e+06	855088	1.80878e+06	1.21164e+06	1.76224e+06	854269	0.00121951
sp|Q96PK6-3|RBM14_HUMAN;sp|Q96PK6-5|RBM14_HUMAN;sp|Q96PK6-4|RBM14_HUMAN;sp|Q96PK6-2|RBM14_HUMAN;tr|A0A0A0MSL8|A0A0A0MSL8_HUMAN;tr|B8ZZ74|B8ZZ74_HUMAN;tr|A0A0A6YYI9|A0A0A6YYI9_HUMAN;tr|F8WDX3|F8WDX3_HUMAN	FALSE	3.22921e+06	2.22191e+06	3.77099e+06	1877908	3.31036e+06	1.92894e+06	0.00121951
sp|P24752-2|THIL_HUMAN;sp|P24752|THIL_HUMAN;tr|E9PRQ6|E9PRQ6_HUMAN;tr|H0YEL7|H0YEL7_HUMAN	FALSE	7014172	4.19286e+06	6344761	3157090	6.87619e+06	3.09459e+06	0.00121951
tr|J3KTL2|J3KTL2_HUMAN;sp|Q07955-2|SRSF1_HUMAN;sp|Q07955-3|SRSF1_HUMAN;sp|Q07955|SRSF1_HUMAN	FALSE	12883952	8027460	13062715	7.29471e+06	13197380	7.46067e+06	0.00121951
tr|Q5T624|Q5T624_HUMAN;sp|P49321-3|NASP_HUMAN;sp|P49321-2|NASP_HUMAN;sp|P49321|NASP_HUMAN;tr|H0YDS9|H0YDS9_HUMAN;sp|P49321-4|NASP_HUMAN	FALSE	17683480	11872232	24138640	14365271	19630312	15644352	0.00457666
sp|Q9BYZ2|LDH6B_HUMAN	FALSE	90990432	62766536	105601656	62762636	100615144	66431804	0
tr|D3YTB1|D3YTB1_HUMAN;sp|P62910|RL32_HUMAN;tr|F8W727|F8W727_HUMAN	FALSE	43191424	23067134	32945684	19109800	34156760	29992528	0
sp|P15531-2|NDKA_HUMAN;tr|E7ERL0|E7ERL0_HUMAN;sp|P15531|NDKA_HUMAN;tr|J3KPD9|J3KPD9_HUMAN	FALSE	55453816	35342880	54457916	36994616	50355952	30472644	0
tr|S4R349|S4R349_HUMAN;tr|S4R402|S4R402_HUMAN;tr|S4R341|S4R341_HUMAN	FALSE	13809916	11426511	16923406	10437707	17148956	7.3472e+06	0.00121951
sp|Q58FF6|H90B4_HUMAN	FALSE	54182076	38245464	56908316	31359720	57427868	27435306	0
tr|J3QRC4|J3QRC4_HUMAN	FALSE	7.63537e+06	5.53632e+06	6771012	2.1321e+06	2.00357e+06	1.69979e+06	0.00345622
sp|Q99729-4|ROAA_HUMAN;tr|D6RBZ0|D6RBZ0_HUMAN;sp|Q99729-2|ROAA_HUMAN;sp|Q99729-3|ROAA_HUMAN;tr|D6R9P3|D6R9P3_HUMAN;sp|Q99729|ROAA_HUMAN;tr|D6RD18|D6RD18_HUMAN	FALSE	19167750	11510124	21683798	10613438	16425779	8808818	0
sp|P16070-13|CD44_HUMAN;sp|P16070-8|CD44_HUMAN;sp|P16070-7|CD44_HUMAN;sp|P16070-17|CD44_HUMAN;tr|H0YCV9|H0YCV9_HUMAN;sp|P16070-12|CD44_HUMAN;tr|H0Y2P0|H0Y2P0_HUMAN;sp|P16070-3|CD44_HUMAN;tr|H0Y5E4|H0Y5E4_HUMAN;sp|P16070-16|CD44_HUMAN;sp|P16070|CD44_HUMAN;sp|P16070-5|CD44_HUMAN;sp|P16070-9|CD44_HUMAN;sp|P16070-18|CD44_HUMAN;tr|H0YDW7|H0YDW7_HUMAN;sp|P16070-10|CD44_HUMAN;tr|H0YD13|H0YD13_HUMAN;tr|H…	FALSE	8720149	5736268	9360337	5.52718e+06	8932518	5246023	0.00121951
sp|O75880|SCO1_HUMAN;tr|J3QL56|J3QL56_HUMAN	FALSE	8650316	1.21305e+06	4.00779e+06	37533708	2.24929e+06	0	0.00345622
sp|Q04637-8|IF4G1_HUMAN;sp|Q04637-4|IF4G1_HUMAN;sp|Q04637-3|IF4G1_HUMAN;tr|E9PGM1|E9PGM1_HUMAN;sp|Q04637-9|IF4G1_HUMAN;tr|H7C044|H7C044_HUMAN;sp|Q04637-5|IF4G1_HUMAN;tr|E7EX73|E7EX73_HUMAN;sp|Q04637-6|IF4G1_HUMAN;sp|Q04637|IF4G1_HUMAN;sp|Q04637-7|IF4G1_HUMAN;tr|E7EUU4|E7EUU4_HUMAN	FALSE	6.98952e+06	4.75206e+06	7.81938e+06	5488744	7059677	4349317	0.00121951
sp|P33993-3|MCM7_HUMAN;sp|P33993|MCM7_HUMAN	FALSE	819891	710370	879672	446770	748551	561382	0.00121951
sp|P60660-2|MYL6_HUMAN;tr|J3KND3|J3KND3_HUMAN;tr|G8JLA2|G8JLA2_HUMAN;sp|P60660|MYL6_HUMAN;tr|F8W1R7|F8W1R7_HUMAN;tr|B7Z6Z4|B7Z6Z4_HUMAN;tr|G3V1V0|G3V1V0_HUMAN;tr|F8VPF3|F8VPF3_HUMAN	FALSE	9175455	5131593	8738907	6191850	8903208	5.5641e+06	0
sp|Q969Q0|RL36L_HUMAN;tr|J3KQN4|J3KQN4_HUMAN;sp|P83881|RL36A_HUMAN;tr|H7BZ11|H7BZ11_HUMAN;tr|H0Y5B4|H0Y5B4_HUMAN	FALSE	14196317	8.23926e+06	16788914	9267307	14314455	11077984	0.00121951
tr|J3QLK0|J3QLK0_HUMAN;sp|P63000|RAC1_HUMAN;tr|J3KSC4|J3KSC4_HUMAN;sp|P63000-2|RAC1_HUMAN;sp|P60763|RAC3_HUMAN	FALSE	2.01079e+06	1.22749e+06	1.94468e+06	926257	2.16241e+06	1.12222e+06	0.00121951
sp|P00505|AATM_HUMAN;sp|P00505-2|AATM_HUMAN	FALSE	18361102	12609696	20207504	9772403	16507480	10306030	0.00121951
sp|O95433-2|AHSA1_HUMAN;tr|H0YJ63|H0YJ63_HUMAN;tr|G3V438|G3V438_HUMAN;sp|O95433|AHSA1_HUMAN;tr|H0YJG7|H0YJG7_HUMAN	FALSE	13122620	8.14752e+06	13529698	8715696	13813555	7668608	0
tr|B4DEV8|B4DEV8_HUMAN;tr|F5GX11|F5GX11_HUMAN;sp|P25786|PSA1_HUMAN;sp|P25786-2|PSA1_HUMAN	FALSE	11435954	6.59624e+06	11255812	8805084	11281803	7217972	0.00121951
tr|D6RAT0|D6RAT0_HUMAN;tr|D6RB09|D6RB09_HUMAN;tr|D6RG13|D6RG13_HUMAN;sp|P61247|RS3A_HUMAN	FALSE	27824594	17545644	29902430	20536502	30461838	18349208	0
sp|Q96HN2-4|SAHH3_HUMAN;sp|Q96HN2-2|SAHH3_HUMAN;tr|H0Y8B3|H0Y8B3_HUMAN;sp|Q96HN2|SAHH3_HUMAN;sp|O43865-2|SAHH2_HUMAN;sp|O43865|SAHH2_HUMAN;sp|Q96HN2-3|SAHH3_HUMAN	FALSE	1.81803e+06	995503	1.09391e+06	1.0031e+06	1.43372e+06	6093918	0.00121951
sp|P29401-2|TKT_HUMAN	FALSE	220759136	138533376	277402720	141190624	258432448	144970800	0
tr|H0YNP5|H0YNP5_HUMAN	FALSE	13337105	7.52537e+06	12782008	7140266	14527192	7.27256e+06	0
sp|P50990-2|TCPQ_HUMAN;sp|P50990|TCPQ_HUMAN	FALSE	84514600	55782100	86143432	52370512	82842720	48707280	0
sp|P15170-2|ERF3A_HUMAN;sp|P15170-3|ERF3A_HUMAN;sp|P15170|ERF3A_HUMAN	FALSE	11257299	7366807	10140983	5.46182e+06	8719586	5866603	0
tr|F5H0S8|F5H0S8_HUMAN;tr|E9PCP0|E9PCP0_HUMAN;sp|P16520-2|GBB3_HUMAN;tr|F5H100|F5H100_HUMAN;tr|F5H8J8|F5H8J8_HUMAN;sp|P16520|GBB3_HUMAN	FALSE	4.80653e+06	1786687	3.78213e+06	1.64235e+06	831785	651560	0.00121951
sp|Q9UII2|ATIF1_HUMAN;sp|Q9UII2-2|ATIF1_HUMAN;tr|A0A0B4J230|A0A0B4J230_HUMAN;sp|Q9UII2-3|ATIF1_HUMAN	FALSE	1.73282e+06	804307	1640378	775153	2.19651e+06	2107978	0.00121951
tr|I3L3Z8|I3L3Z8_HUMAN;sp|Q6P2Q9|PRP8_HUMAN	FALSE	6.60772e+06	4.12898e+06	7.64967e+06	6.35759e+06	9732469	8.03597e+06	0.00121951
tr|D6RAC2|D6RAC2_HUMAN	FALSE	18154630	22725736	25155896	13754871	21785784	11934989	0.00121951
tr|H0YH80|H0YH80_HUMAN	FALSE	196260208	112691520	200708432	92642672	161360608	107187224	0
tr|H3BNC9|H3BNC9_HUMAN;tr|H0YN88|H0YN88_HUMAN;sp|P08708|RS17_HUMAN;tr|A0A075B716|A0A075B716_HUMAN	FALSE	91810024	64404348	93256304	42042484	76954296	47286704	0
sp|Q8NC51-4|PAIRB_HUMAN;sp|Q8NC51-2|PAIRB_HUMAN	FALSE	16998410	11449182	18027516	12062259	18780370	10996974	0
sp|P48741|HSP77_HUMAN	FALSE	86342120	54524924	91333960	67731992	84133888	53110136	0
tr|E9PQQ4|E9PQQ4_HUMAN;tr|E9PLF4|E9PLF4_HUMAN;tr|E9PQK7|E9PQK7_HUMAN;tr|E9PK54|E9PK54_HUMAN	FALSE	169336336	119337832	181522400	136990688	175351952	118405696	0
sp|P62633-3|CNBP_HUMAN;sp|P62633-7|CNBP_HUMAN;sp|P62633-2|CNBP_HUMAN;sp|P62633-6|CNBP_HUMAN;sp|P62633|CNBP_HUMAN;sp|P62633-5|CNBP_HUMAN;sp|P62633-8|CNBP_HUMAN;sp|P62633-4|CNBP_HUMAN	FALSE	966732	594296	948802	618871	925049	416907	0.00121951
tr|H0YBG7|H0YBG7_HUMAN;tr|H0YBD7|H0YBD7_HUMAN	FALSE	2.45278e+06	1.32986e+06	2.3012e+06	1.85241e+06	2400508	1.75055e+06	0.00121951
sp|P14618-2|KPYM_HUMAN	FALSE	1.94787e+06	1.0359e+06	1.9327e+06	1.08935e+06	1.80247e+06	922349	0.00121951
tr|E5RIF8|E5RIF8_HUMAN;tr|E5RI46|E5RI46_HUMAN;sp|Q9UN86|G3BP2_HUMAN;tr|D6RE13|D6RE13_HUMAN;tr|E5RH42|E5RH42_HUMAN;tr|D6RBR0|D6RBR0_HUMAN;tr|E5RIZ6|E5RIZ6_HUMAN;tr|D6RBM9|D6RBM9_HUMAN;tr|D6R9A4|D6R9A4_HUMAN;sp|Q9UN86-2|G3BP2_HUMAN;sp|Q13283-2|G3BP1_HUMAN;tr|D6RAC7|D6RAC7_HUMAN;sp|Q13283|G3BP1_HUMAN;tr|E5RJU8|E5RJU8_HUMAN;tr|E5RH00|E5RH00_HUMAN;tr|D6RGJ4|D6RGJ4_HUMAN;tr|D6R9X5|D6R9X5_HUMAN;tr|D6RBW…	FALSE	20626938	18945830	19865844	12691623	24103764	12383158	0.00121951
sp|Q07666-2|KHDR1_HUMAN;sp|Q07666|KHDR1_HUMAN	FALSE	6275558	4529740	6.39248e+06	3.89132e+06	6.7697e+06	3874465	0.00121951
sp|Q13263-2|TIF1B_HUMAN;sp|Q13263|TIF1B_HUMAN	FALSE	38222404	11128399	38699912	26864658	29673196	22759314	0
tr|A0A087X2D0|A0A087X2D0_HUMAN;sp|P84103-2|SRSF3_HUMAN;sp|P84103|SRSF3_HUMAN	FALSE	10112600	10368681	15195441	17239726	16492569	10573180	0
tr|B7Z2E6|B7Z2E6_HUMAN;tr|H0YB80|H0YB80_HUMAN	FALSE	14567961	11647731	19308594	7565874	17699068	18266564	0.00345622
tr|A0A0C4DFV9|A0A0C4DFV9_HUMAN;sp|Q01105-4|SET_HUMAN;sp|Q01105-3|SET_HUMAN;sp|Q01105|SET_HUMAN;sp|Q01105-2|SET_HUMAN	FALSE	29915734	24190952	34478420	21910588	40355728	28518380	0.00121951
tr|A0A1X7SBZ2|A0A1X7SBZ2_HUMAN;sp|Q92841-2|DDX17_HUMAN;sp|Q92841-3|DDX17_HUMAN;tr|A0A1W2PQ51|A0A1W2PQ51_HUMAN;sp|Q92841|DDX17_HUMAN;sp|Q92841-1|DDX17_HUMAN	FALSE	13766689	8166552	13522002	9024948	11300532	12711194	0
sp|P17661|DESM_HUMAN	FALSE	29190404	20040616	26298686	20947296	27509164	15409612	0
sp|P31947-2|1433S_HUMAN;tr|E9PG15|E9PG15_HUMAN;sp|Q04917|1433F_HUMAN;tr|A2IDB2|A2IDB2_HUMAN;sp|P31947|1433S_HUMAN	FALSE	54716308	35780800	52879388	36012092	52387020	31480370	0
tr|A0A2R8Y623|A0A2R8Y623_HUMAN	FALSE	170525280	114444136	160266608	100600368	159398496	92733144	0.00121951
tr|C9JM19|C9JM19_HUMAN;tr|B5MCT8|B5MCT8_HUMAN	FALSE	13464458	12973949	18954598	11104118	19069686	12157166	0.00240964
tr|G3V0E5|G3V0E5_HUMAN;sp|P02786|TFR1_HUMAN	FALSE	17519496	7.33531e+06	14778223	8491802	16985046	9183393	0
tr|K7EP65|K7EP65_HUMAN;tr|K7EKS7|K7EKS7_HUMAN;tr|K7ELC4|K7ELC4_HUMAN	FALSE	37940256	24162048	38352316	25496566	37416064	22612496	0
sp|P07900|HS90A_HUMAN;sp|P07900-2|HS90A_HUMAN	FALSE	962586624	609438912	1038680896	620493120	963678144	559472832	0
sp|P62851|RS25_HUMAN	FALSE	57095216	36907668	54727056	34382992	53182188	32240056	0
tr|F8VZY9|F8VZY9_HUMAN	FALSE	479825248	301470400	492676608	278668576	476591968	304494144	0
sp|Q15233-2|NONO_HUMAN;sp|Q15233|NONO_HUMAN	FALSE	39286552	22703418	36258112	25400698	36587436	22348622	0.00121951
sp|Q12931|TRAP1_HUMAN;sp|Q12931-2|TRAP1_HUMAN	FALSE	17238876	20366026	19593732	3408556	2481029	2.78354e+06	0.00345622
sp|P0CL82|GG12I_HUMAN;sp|A6NER3|GG12J_HUMAN;sp|A1L429|GG12C_HUMAN;sp|P0CL80-2|GG12F_HUMAN;sp|P0CL80|GG12F_HUMAN;sp|O76087|GAGE7_HUMAN;sp|Q4V321|GAG13_HUMAN;sp|Q13070|GAGE6_HUMAN;sp|P0CL81|GG12G_HUMAN;sp|Q13065|GAGE1_HUMAN;sp|A6NDE8|GG12H_HUMAN;sp|Q13068|GAGE4_HUMAN;sp|Q4V326|GAG2E_HUMAN;sp|Q13069|GAGE5_HUMAN	FALSE	12220848	6.84688e+06	12520600	6.65561e+06	10314521	5.98637e+06	0.00121951
tr|F5GYK7|F5GYK7_HUMAN;sp|P43304|GPDM_HUMAN	FALSE	514377	392306	709701	315739	391781	622225	0.00457666
sp|P51858-2|HDGF_HUMAN;sp|P51858-3|HDGF_HUMAN;sp|P51858|HDGF_HUMAN	FALSE	9911089	5.51741e+06	9560418	5.66042e+06	6596283	4.0479e+06	0.00345622
tr|Q5T0R8|Q5T0R8_HUMAN;sp|Q01518|CAP1_HUMAN;tr|Q5T0R1|Q5T0R1_HUMAN;tr|Q5T0R3|Q5T0R3_HUMAN;tr|Q5T0R2|Q5T0R2_HUMAN;tr|Q5T0R5|Q5T0R5_HUMAN;sp|Q01518-2|CAP1_HUMAN;tr|Q5T0S3|Q5T0S3_HUMAN;tr|Q5T0R7|Q5T0R7_HUMAN;tr|Q5T0R9|Q5T0R9_HUMAN;tr|Q5T0R6|Q5T0R6_HUMAN;tr|Q5T0R4|Q5T0R4_HUMAN	FALSE	1.87156e+06	1.22809e+06	2.03131e+06	716639	1867024	1081528	0.00121951
tr|A0A087WY81|A0A087WY81_HUMAN;tr|J3KSJ0|J3KSJ0_HUMAN	FALSE	30538776	18805752	28275636	15762217	28389920	16423844	0
sp|Q13310-3|PABP4_HUMAN;sp|Q13310-2|PABP4_HUMAN;tr|B1ANR0|B1ANR0_HUMAN;sp|Q13310|PABP4_HUMAN	FALSE	8708567	6429721	8452636	7.26742e+06	8204496	6.04607e+06	0
tr|H0YKD8|H0YKD8_HUMAN;sp|P46779-3|RL28_HUMAN;tr|H0YMF4|H0YMF4_HUMAN;sp|P46779-4|RL28_HUMAN;sp|P46779-2|RL28_HUMAN;sp|P46779-5|RL28_HUMAN;sp|P46779|RL28_HUMAN	FALSE	33592476	28115826	29183998	13189910	22805688	13656899	0
tr|D6RFZ9|D6RFZ9_HUMAN;tr|D6RFX4|D6RFX4_HUMAN;tr|D6R9L0|D6R9L0_HUMAN;tr|D6R9Z1|D6R9Z1_HUMAN	FALSE	8241509	5.12079e+06	6818132	4761774	7.97576e+06	5064897	0.00121951
sp|P12268|IMDH2_HUMAN;tr|H0Y4R1|H0Y4R1_HUMAN	FALSE	29264626	18318358	27444248	17742832	29080424	16458898	0
tr|A0A087X2B5|A0A087X2B5_HUMAN;tr|I3L192|I3L192_HUMAN;sp|P35613|BASI_HUMAN;sp|P35613-2|BASI_HUMAN	FALSE	15200431	8704955	15982507	9320727	14131721	6881265	0.00121951
tr|H0YFC6|H0YFC6_HUMAN	FALSE	85166928	53959216	82171088	49020408	84081088	50397416	0
sp|Q12906-7|ILF3_HUMAN;sp|Q12906-2|ILF3_HUMAN;sp|Q12906|ILF3_HUMAN;sp|Q12906-6|ILF3_HUMAN;sp|Q12906-4|ILF3_HUMAN;sp|Q12906-3|ILF3_HUMAN;sp|Q12906-5|ILF3_HUMAN	FALSE	24358018	14766390	22881132	13406740	22166748	13528535	0.00121951
sp|P50914|RL14_HUMAN;tr|E7EPB3|E7EPB3_HUMAN	FALSE	78377256	48594304	76979240	50439312	86910232	44476088	0
tr|G3V3J6|G3V3J6_HUMAN;tr|G3V3W7|G3V3W7_HUMAN;tr|G3V4U2|G3V4U2_HUMAN	FALSE	45673144	28528820	43820372	27356642	42444940	24809278	0
tr|H0YJ11|H0YJ11_HUMAN;sp|P12814-3|ACTN1_HUMAN;sp|P12814-4|ACTN1_HUMAN;sp|P12814|ACTN1_HUMAN;tr|H7C5W8|H7C5W8_HUMAN;tr|H9KV75|H9KV75_HUMAN;tr|H0YJW3|H0YJW3_HUMAN;sp|P12814-2|ACTN1_HUMAN	FALSE	7.62353e+06	5.52222e+06	7240957	31972552	3656667	21233186	0.00121951
sp|P17096-3|HMGA1_HUMAN;sp|P17096|HMGA1_HUMAN	FALSE	14288773	9637200	17118584	6563039	14997259	8591880	0
sp|P57721-2|PCBP3_HUMAN;sp|P57721-3|PCBP3_HUMAN;sp|P57721-4|PCBP3_HUMAN;tr|E9PFP8|E9PFP8_HUMAN;sp|P57721|PCBP3_HUMAN;tr|J3QT27|J3QT27_HUMAN;sp|P57721-5|PCBP3_HUMAN	FALSE	16043439	10307921	16747178	12665546	15170975	11725495	0
tr|E5RJ25|E5RJ25_HUMAN;tr|E5RIP5|E5RIP5_HUMAN;tr|E5RHS5|E5RHS5_HUMAN;tr|E5RII3|E5RII3_HUMAN;tr|H0YBR5|H0YBR5_HUMAN;sp|P60228|EIF3E_HUMAN;tr|H0YBP5|H0YBP5_HUMAN	FALSE	3485007	2.79496e+06	4.58822e+06	2.94404e+06	5.15555e+06	2.93634e+06	0.00345622
tr|K7EM38|K7EM38_HUMAN;tr|A0A2R8YGF8|A0A2R8YGF8_HUMAN;tr|J3KT65|J3KT65_HUMAN;tr|I3L3R2|I3L3R2_HUMAN;tr|G5E9R0|G5E9R0_HUMAN;tr|E7EVS6|E7EVS6_HUMAN	FALSE	707705088	459736448	693705728	411848992	669005120	399492896	0
tr|M0R0R2|M0R0R2_HUMAN;tr|M0R0F0|M0R0F0_HUMAN;sp|P46782|RS5_HUMAN	FALSE	6.97644e+06	4468320	14480396	755487	6763403	1.99306e+06	0.00121951
sp|P00338|LDHA_HUMAN;sp|P00338-3|LDHA_HUMAN	FALSE	60984668	37915392	62264208	40189492	58468080	35530868	0.00121951
tr|M0R1H6|M0R1H6_HUMAN	FALSE	28855016	16439048	27671516	14458745	24275084	15667458	0
sp|P32754|HPPD_HUMAN;tr|A0A0B4J1R4|A0A0B4J1R4_HUMAN;sp|P32754-2|HPPD_HUMAN	FALSE	40138244	27403700	41587508	24520020	39721712	22327438	0
XXX_tr|J3KNB4|J3KNB4_HUMAN;XXX_sp|P49913|CAMP_HUMAN	TRUE	28284.9	8643.97	1.72912e+06	1.20242e+06	1.62885e+06	790809	0.00793651
sp|O00541|PESC_HUMAN;tr|B5MCF9|B5MCF9_HUMAN;sp|O00541-2|PESC_HUMAN;tr|B3KXD6|B3KXD6_HUMAN	FALSE	3.12647e+06	1.4958e+06	2.64475e+06	1.67672e+06	2.64628e+06	1.89636e+06	0.00345622
tr|K7EM56|K7EM56_HUMAN;sp|P62841|RS15_HUMAN;tr|K7ELC2|K7ELC2_HUMAN;tr|A0A0B4J2B4|A0A0B4J2B4_HUMAN;tr|S4R417|S4R417_HUMAN	FALSE	24043414	22652640	27945360	17557284	23822414	16773941	0.00121951
tr|E7ENU7|E7ENU7_HUMAN;tr|E7EQV9|E7EQV9_HUMAN;sp|P61313|RL15_HUMAN;tr|A0A2R8YEM3|A0A2R8YEM3_HUMAN	FALSE	11852010	6309804	9339678	5640010	10139910	5.94766e+06	0
sp|P26641-2|EF1G_HUMAN;sp|P26641|EF1G_HUMAN	FALSE	147217488	88639928	146474496	82530024	133631064	86707184	0
sp|P30154|2AAB_HUMAN;tr|E9PNM7|E9PNM7_HUMAN;tr|C9J9C1|C9J9C1_HUMAN;sp|P30153|2AAA_HUMAN;sp|P30154-2|2AAB_HUMAN;tr|E9PPI5|E9PPI5_HUMAN;sp|P30154-4|2AAB_HUMAN;tr|E9PHZ6|E9PHZ6_HUMAN;sp|P30154-5|2AAB_HUMAN	FALSE	6313617	4.25218e+06	7469337	5494862	7198797	3508557	0.00121951
sp|Q15369|ELOC_HUMAN;sp|Q15369-2|ELOC_HUMAN;tr|R4GMY8|R4GMY8_HUMAN;tr|E5RHG8|E5RHG8_HUMAN	FALSE	4.27348e+06	2.44862e+06	5351714	2300797	3668602	1.96325e+06	0
sp|P21333-2|FLNA_HUMAN;sp|P21333|FLNA_HUMAN;tr|Q60FE5|Q60FE5_HUMAN;tr|A0A087WWY3|A0A087WWY3_HUMAN	FALSE	20819102	14749003	18788870	9466315	19054674	10849414	0
tr|F2Z388|F2Z388_HUMAN;sp|P42766|RL35_HUMAN	FALSE	48108376	26066016	41511240	23798984	41771536	22188414	0
sp|P08195-4|4F2_HUMAN;tr|F5GZS6|F5GZS6_HUMAN;tr|J3KPF3|J3KPF3_HUMAN;sp|P08195|4F2_HUMAN;sp|P08195-2|4F2_HUMAN;sp|P08195-3|4F2_HUMAN	FALSE	148121824	102352360	141579440	101794456	134471392	96522752	0
tr|F8WB72|F8WB72_HUMAN;tr|F8WBS5|F8WBS5_HUMAN;sp|P18077|RL35A_HUMAN;tr|C9K025|C9K025_HUMAN	FALSE	38375976	21901420	38192548	20108830	40207408	21894782	0.00121951
sp|A6NHL2|TBAL3_HUMAN;sp|A6NHL2-2|TBAL3_HUMAN	FALSE	35608620	22097354	35965484	29525644	35552028	20940382	0
sp|P0DME0|SETLP_HUMAN;tr|A0A087X027|A0A087X027_HUMAN	FALSE	6696507	4.01935e+06	7.1277e+06	4591904	7106821	4.7212e+06	0.00121951
sp|O75340-2|PDCD6_HUMAN;sp|O75340|PDCD6_HUMAN;tr|A0A087WZ38|A0A087WZ38_HUMAN;tr|H0Y9X3|H0Y9X3_HUMAN;tr|A0A024QZ42|A0A024QZ42_HUMAN	FALSE	6833144	4019052	7.63927e+06	3.14064e+06	6.59877e+06	3.85574e+06	0.00121951
sp|Q16658|FSCN1_HUMAN	FALSE	75486656	57099016	85232904	60563284	76485448	63968784	0
tr|H0YI37|H0YI37_HUMAN	FALSE	103302056	81241864	110676064	84558336	105375992	74561920	0.00121951
tr|A2A3R5|A2A3R5_HUMAN	FALSE	89659096	51179532	71491320	45062440	65097072	37481272	0.00121951
tr|G3V2D6|G3V2D6_HUMAN;tr|G3V5V7|G3V5V7_HUMAN	FALSE	24986276	14753702	24480440	10694243	22835664	14743190	0
tr|K7EMA7|K7EMA7_HUMAN;sp|P62750|RL23A_HUMAN;tr|A8MUS3|A8MUS3_HUMAN;tr|K7EJV9|K7EJV9_HUMAN;tr|K7ERT8|K7ERT8_HUMAN;tr|H7BY10|H7BY10_HUMAN	FALSE	65952564	35608904	64320516	33505530	65009900	37096976	0
tr|B5MDF5|B5MDF5_HUMAN;tr|J3KQE5|J3KQE5_HUMAN;sp|P62826|RAN_HUMAN	FALSE	54389976	32506762	46901888	29148752	49151112	30471690	0
sp|Q13813|SPTN1_HUMAN;tr|A0A0D9SF54|A0A0D9SF54_HUMAN;sp|Q13813-2|SPTN1_HUMAN;tr|A0A0D9SGF6|A0A0D9SGF6_HUMAN;sp|Q13813-3|SPTN1_HUMAN	FALSE	19286966	9949902	18822122	12081347	20725564	13892834	0
tr|J3QQV5|J3QQV5_HUMAN;tr|J3KSW7|J3KSW7_HUMAN	FALSE	9786629	6638528	10066161	5.08478e+06	9154598	6706705	0
sp|P06753-3|TPM3_HUMAN;sp|P06753-6|TPM3_HUMAN	FALSE	5673162	3.98189e+06	6309303	4511572	5.87625e+06	4155468	0.00121951
tr|D6RGE0|D6RGE0_HUMAN	FALSE	35716868	22371960	36872548	23154600	41458116	23479612	0
sp|P60174|TPIS_HUMAN;sp|P60174-1|TPIS_HUMAN	FALSE	243666800	178698224	260220464	156030464	260898096	174432976	0
tr|H0Y5F5|H0Y5F5_HUMAN;tr|H0YEU6|H0YEU6_HUMAN	FALSE	5313804	4382582	6.26888e+06	3.91176e+06	5.4696e+06	2.90846e+06	0.00121951
tr|K7ELR7|K7ELR7_HUMAN;tr|A0A2R8YF08|A0A2R8YF08_HUMAN;tr|K7ERC6|K7ERC6_HUMAN;tr|K7EP41|K7EP41_HUMAN	FALSE	13088540	7309913	11838434	6752163	12322458	6219430	0.00121951
sp|P08754|GNAI3_HUMAN;tr|A2A2R6|A2A2R6_HUMAN;sp|A8MTJ3|GNAT3_HUMAN;sp|P09471|GNAO_HUMAN;tr|A0A1W2PQK2|A0A1W2PQK2_HUMAN;sp|P19087|GNAT2_HUMAN;sp|P63092-2|GNAS2_HUMAN;sp|P63092|GNAS2_HUMAN;sp|P63096|GNAI1_HUMAN;sp|P38405-2|GNAL_HUMAN;tr|A0A1W2PS82|A0A1W2PS82_HUMAN;tr|A0A3B3IUA8|A0A3B3IUA8_HUMAN;sp|P63092-3|GNAS2_HUMAN;sp|Q5JWF2-2|GNAS1_HUMAN;sp|P38405|GNAL_HUMAN;tr|A0A1W2PRE1|A0A1W2PRE1_HUMAN;tr|H0…	FALSE	8.03303e+06	4.44633e+06	7739930	3962942	7283399	3.65197e+06	0
tr|C9JZI7|C9JZI7_HUMAN;tr|A8MXH2|A8MXH2_HUMAN;tr|C9J6D1|C9J6D1_HUMAN;sp|Q99733-2|NP1L4_HUMAN;sp|Q99733|NP1L4_HUMAN	FALSE	12048759	5.98422e+06	14605698	6.70888e+06	11030758	8877563	0.00121951
tr|J3KRB3|J3KRB3_HUMAN;sp|P18621|RL17_HUMAN;tr|A0A087WWH0|A0A087WWH0_HUMAN;sp|P18621-3|RL17_HUMAN;tr|A0A0A6YYL6|A0A0A6YYL6_HUMAN;tr|J3KRX5|J3KRX5_HUMAN;tr|J3QS96|J3QS96_HUMAN;tr|A0A087WXM6|A0A087WXM6_HUMAN;tr|J3QQT2|J3QQT2_HUMAN	FALSE	17481024	9499294	14960293	7871369	14376392	7.99788e+06	0
sp|Q14240|IF4A2_HUMAN;tr|E7EQG2|E7EQG2_HUMAN;sp|Q14240-2|IF4A2_HUMAN	FALSE	111262224	89316688	122387832	97818736	114472696	84861344	0.00121951
tr|A0A1W2PQD4|A0A1W2PQD4_HUMAN	FALSE	38884784	27770710	40690688	44479128	45744872	31405950	0
sp|Q13885|TBB2A_HUMAN	FALSE	308853120	161063936	364451520	186862304	283553216	210776736	0
tr|A0A2U3TZU2|A0A2U3TZU2_HUMAN;sp|P06744|G6PI_HUMAN;sp|P06744-2|G6PI_HUMAN;tr|A0A0A0MTS2|A0A0A0MTS2_HUMAN	FALSE	22170650	16838364	22889166	17744342	24379126	13144550	0
tr|H7C1H2|H7C1H2_HUMAN	FALSE	6787520	6.99449e+06	25564880	16949620	24896496	15190313	0.00121951
sp|Q9BTM1-2|H2AJ_HUMAN	FALSE	553650880	364031648	577278592	380687008	526371232	347082816	0
sp|P40925|MDHC_HUMAN;sp|P40925-2|MDHC_HUMAN;sp|P40925-3|MDHC_HUMAN;tr|B9A041|B9A041_HUMAN;tr|C9JRL4|C9JRL4_HUMAN;tr|C9JF79|C9JF79_HUMAN	FALSE	9236774	6.09575e+06	8.21e+06	7.49121e+06	10290067	6.0373e+06	0
tr|A0A0B4J207|A0A0B4J207_HUMAN;tr|A0A2R8Y7H4|A0A2R8Y7H4_HUMAN;sp|P21108|PRPS3_HUMAN;sp|P60891|PRPS1_HUMAN;tr|B1ALA9|B1ALA9_HUMAN	FALSE	11250379	6.22556e+06	14658865	6.45512e+06	9525549	7189310	0.00121951
tr|A0A2R8Y798|A0A2R8Y798_HUMAN;tr|A0A2R8YEG5|A0A2R8YEG5_HUMAN	FALSE	6.77942e+06	3.60901e+06	7.89261e+06	4299263	7399645	4.05605e+06	0
sp|P55884-2|EIF3B_HUMAN;sp|P55884|EIF3B_HUMAN	FALSE	9037349	10046600	12661173	8486422	20506316	9581229	0.00121951
sp|P26038|MOES_HUMAN	FALSE	9833763	5.36895e+06	9654725	6.78854e+06	8906597	5.74695e+06	0.00121951
sp|P18206-2|VINC_HUMAN;sp|P18206|VINC_HUMAN;tr|A0A096LPE1|A0A096LPE1_HUMAN	FALSE	10105989	8.01416e+06	12218126	9970074	12193562	7.48013e+06	0.00345622
tr|Q5ST81|Q5ST81_HUMAN	FALSE	345205984	240519968	351761216	251687408	347813664	214702800	0
sp|Q58FG1|HS904_HUMAN	FALSE	71058048	50217640	76245456	49830220	83423864	68403072	0
sp|P68133|ACTS_HUMAN;sp|P68032|ACTC_HUMAN	FALSE	69866320	43476948	75222720	45693380	70373752	43332028	0.00121951
sp|Q00610|CLH1_HUMAN;tr|A0A087WVQ6|A0A087WVQ6_HUMAN;sp|Q00610-2|CLH1_HUMAN	FALSE	44954444	26327372	46188156	27201518	43991432	26578294	0
tr|Q5T7N0|Q5T7N0_HUMAN	FALSE	47542880	27928096	44262512	28064326	45183392	27186640	0.00121951
tr|F5H3X6|F5H3X6_HUMAN	FALSE	27423784	16109747	32661510	16590112	28619650	19185714	0.00121951
tr|B4DV51|B4DV51_HUMAN	FALSE	35080724	19950270	32237376	15860869	30094478	16288778	0
XXX_sp|A4D1B5|GSAP_HUMAN;XXX_tr|B7ZL33|B7ZL33_HUMAN;XXX_sp|A4D1B5-4|GSAP_HUMAN	TRUE	22283108	13962065	24708674	24227962	22016434	14417576	0.00240964
tr|H7C0C1|H7C0C1_HUMAN;sp|P48047|ATPO_HUMAN	FALSE	2845681	1873088	3.45787e+06	1.49847e+06	2.6264e+06	1.70783e+06	0.00121951
tr|F8W1K8|F8W1K8_HUMAN	FALSE	15190767	14410411	18314854	11630648	15352588	13497460	0.00345622
tr|F8W0P7|F8W0P7_HUMAN	FALSE	13475949	13195275	17479032	16951936	18138022	16972300	0.00121951
tr|F8WCH0|F8WCH0_HUMAN	FALSE	612008640	401165536	608315136	421874112	632827904	394688608	0.00121951
tr|E7ENZ3|E7ENZ3_HUMAN;tr|B7ZAR1|B7ZAR1_HUMAN;sp|P48643|TCPE_HUMAN;tr|E9PCA1|E9PCA1_HUMAN;sp|P48643-2|TCPE_HUMAN	FALSE	196060992	119225840	186806736	77673304	181581152	118551656	0
sp|Q9H2P9|DPH5_HUMAN;sp|Q9H2P9-2|DPH5_HUMAN;sp|Q9H2P9-5|DPH5_HUMAN;sp|Q9H2P9-3|DPH5_HUMAN;sp|Q9H2P9-4|DPH5_HUMAN	FALSE	3.51248e+06	2.48524e+06	3.32879e+06	3663862	3.17451e+06	2.86313e+06	0.00121951
tr|B4DY08|B4DY08_HUMAN;tr|G3V4W0|G3V4W0_HUMAN;tr|B2R5W2|B2R5W2_HUMAN;tr|G3V2Q1|G3V2Q1_HUMAN;tr|G3V4C1|G3V4C1_HUMAN;sp|P07910|HNRPC_HUMAN;sp|P07910-2|HNRPC_HUMAN;tr|G3V576|G3V576_HUMAN	FALSE	63234096	36749500	58086888	33599356	53135920	35377948	0
tr|F8VX11|F8VX11_HUMAN;sp|P23588-2|IF4B_HUMAN;sp|P23588|IF4B_HUMAN;tr|E7EX17|E7EX17_HUMAN	FALSE	14558865	9434294	20264060	9831707	16309742	14370467	0
sp|P62273|RS29_HUMAN;tr|A0A2R8Y851|A0A2R8Y851_HUMAN;sp|P62273-2|RS29_HUMAN	FALSE	6465417	3.84516e+06	6919695	3.02135e+06	5381354	3.42097e+06	0.00121951
tr|J3KTA4|J3KTA4_HUMAN;sp|P17844-2|DDX5_HUMAN;sp|P17844|DDX5_HUMAN	FALSE	53156884	36119284	52142160	38934844	52879888	43839912	0
sp|O60664-4|PLIN3_HUMAN;tr|K7ERZ3|K7ERZ3_HUMAN;sp|O60664-3|PLIN3_HUMAN;sp|O60664-2|PLIN3_HUMAN;sp|O60664|PLIN3_HUMAN	FALSE	22657482	20083176	33099804	24050646	31888964	14409128	0.00121951
tr|F8WCJ1|F8WCJ1_HUMAN;sp|P63241-2|IF5A1_HUMAN;sp|Q6IS14|IF5AL_HUMAN;sp|Q9GZV4|IF5A2_HUMAN;tr|I3L504|I3L504_HUMAN;tr|C9J4W5|C9J4W5_HUMAN;sp|P63241|IF5A1_HUMAN;tr|C9J7B5|C9J7B5_HUMAN;tr|I3L397|I3L397_HUMAN	FALSE	38375564	24533866	38100356	22515770	35087048	23385020	0
sp|Q71U36|TBA1A_HUMAN;sp|Q71U36-2|TBA1A_HUMAN	FALSE	23999608	16603777	28255996	16630685	26225264	14043835	0.00121951
tr|A0A087WV01|A0A087WV01_HUMAN	FALSE	36871632	20541422	37256820	15966803	33719772	19533664	0
tr|F8WCR1|F8WCR1_HUMAN;tr|H7C3M2|H7C3M2_HUMAN	FALSE	12989342	7766404	11784099	5805771	9785155	6.23151e+06	0
sp|P05783|K1C18_HUMAN	FALSE	536334272	420872864	571867648	439637888	586031232	404120896	0
tr|E5RJX2|E5RJX2_HUMAN	FALSE	11131284	7011316	10254420	8262964	11714938	7065151	0
tr|F8WF32|F8WF32_HUMAN	FALSE	17381328	14643543	12358386	6477764	11887087	5.97254e+06	0
sp|Q8TAA3|PSMA8_HUMAN;sp|Q8TAA3-5|PSMA8_HUMAN;sp|O14818-2|PSA7_HUMAN;sp|Q8TAA3-2|PSMA8_HUMAN;tr|A0A087WYS6|A0A087WYS6_HUMAN;sp|O14818|PSA7_HUMAN	FALSE	8.27532e+06	4.02277e+06	8.23172e+06	4.14085e+06	9844537	5470359	0
tr|C9K028|C9K028_HUMAN;tr|E5RHP0|E5RHP0_HUMAN;tr|F6XY72|F6XY72_HUMAN	FALSE	92149960	61473744	97353064	63809968	92307248	60058444	0
tr|A0A087WUK2|A0A087WUK2_HUMAN;sp|O14979|HNRDL_HUMAN;sp|O14979-2|HNRDL_HUMAN;sp|O14979-3|HNRDL_HUMAN	FALSE	34090808	20599442	38777916	15004624	33850160	17831110	0
sp|P26373|RL13_HUMAN	FALSE	24684506	14452811	23263686	14255618	21637522	13021311	0
tr|K7EPJ3|K7EPJ3_HUMAN;sp|O00148-3|DX39A_HUMAN;sp|O00148-2|DX39A_HUMAN;tr|K7EQN7|K7EQN7_HUMAN	FALSE	13366772	7702788	14688307	7407518	12511990	8415042	0.00121951
sp|P21796|VDAC1_HUMAN	FALSE	101919312	73497152	117358848	74140120	119851400	72465304	0
tr|A0A1X7SBS1|A0A1X7SBS1_HUMAN	FALSE	27554610	29730520	36763256	32089368	27951062	38503112	0.00121951
sp|P09651-2|ROA1_HUMAN;sp|P09651-3|ROA1_HUMAN;tr|F8VZ49|F8VZ49_HUMAN;sp|P09651|ROA1_HUMAN;tr|F8W6I7|F8W6I7_HUMAN	FALSE	18106742	10318278	18241792	10311351	17556700	10634593	0.00121951
tr|J3KT29|J3KT29_HUMAN;sp|P62829|RL23_HUMAN;tr|C9JD32|C9JD32_HUMAN	FALSE	27568200	20037362	28537074	17965560	27812402	15782766	0.00121951
tr|C9JL25|C9JL25_HUMAN	FALSE	75920032	55955820	87689736	60592996	79713720	62713516	0.00121951
sp|Q8TD47|RS4Y2_HUMAN	FALSE	15803411	10222924	15363664	7.42783e+06	14026181	8234435	0
sp|P50454|SERPH_HUMAN	FALSE	21561502	12659320	17669300	10844744	18466542	11425771	0.00121951
sp|P62906|RL10A_HUMAN	FALSE	58716452	38716312	57458808	29754356	57285844	35576452	0
tr|Q9BYK1|Q9BYK1_HUMAN	FALSE	14058352	10553406	14793410	8.01233e+06	14493204	9081148	0.00121951
sp|P08670|VIME_HUMAN	FALSE	305790432	202611600	321933856	204551840	335976288	203906288	0
tr|H3BTY8|H3BTY8_HUMAN;tr|H3BPE3|H3BPE3_HUMAN;tr|H3BPE4|H3BPE4_HUMAN;sp|B5ME19|EIFCL_HUMAN;sp|Q99613|EIF3C_HUMAN;sp|Q99613-2|EIF3C_HUMAN	FALSE	1.96983e+06	821148	1.41329e+06	938892	1.9933e+06	838520	0.00121951
sp|P38919|IF4A3_HUMAN;tr|I3L3H2|I3L3H2_HUMAN	FALSE	75770016	39748736	63861032	28172086	69605312	56724324	0.00121951
sp|Q14978|NOLC1_HUMAN;sp|Q14978-2|NOLC1_HUMAN;sp|Q14978-3|NOLC1_HUMAN;tr|A0A0A0MRM9|A0A0A0MRM9_HUMAN	FALSE	6555763	4854538	5978295	5308460	5.52391e+06	3.76985e+06	0.00121951
tr|H0YCK7|H0YCK7_HUMAN;tr|E9PIZ1|E9PIZ1_HUMAN;tr|E9PMW7|E9PMW7_HUMAN	FALSE	14866323	8961431	15440300	11050628	14384216	9471796	0.00121951
sp|P61513|RL37A_HUMAN;tr|C9J4Z3|C9J4Z3_HUMAN	FALSE	20083704	12400373	19578740	9752641	17042498	6.59744e+06	0
tr|H7BZJ3|H7BZJ3_HUMAN	FALSE	30217938	29572252	31486438	27389976	33494438	33628932	0.00121951
sp|Q59GN2|R39L5_HUMAN;sp|P62891|RL39_HUMAN	FALSE	13011926	7157892	13754006	8156456	12173474	7792108	0.00121951
tr|E9PN25|E9PN25_HUMAN	FALSE	22550418	17619902	26754410	20139734	23295100	15963731	0.00345622
sp|P61204|ARF3_HUMAN;tr|F5H423|F5H423_HUMAN;sp|P84077|ARF1_HUMAN;sp|P61204-2|ARF3_HUMAN	FALSE	1477563	732740	1.4252e+06	934587	1.41616e+06	892247	0.00121951
tr|E5RHG7|E5RHG7_HUMAN	FALSE	12160098	8140133	16670166	10781682	15723914	10054648	0.00121951
sp|O60812|HNRC1_HUMAN;sp|B7ZW38|HNRC3_HUMAN;tr|A0A0G2JNQ3|A0A0G2JNQ3_HUMAN;tr|A0A0G2JPF8|A0A0G2JPF8_HUMAN;tr|G3V2H6|G3V2H6_HUMAN;sp|P0DMR1|HNRC4_HUMAN;sp|B2RXH8|HNRC2_HUMAN	FALSE	40745412	27528668	43657560	23822760	45579384	27280146	0
sp|P05387|RLA2_HUMAN	FALSE	55534044	33971532	47313656	30894100	52700412	31459632	0
sp|P80723|BASP1_HUMAN;sp|P80723-2|BASP1_HUMAN	FALSE	32059526	20700616	34367528	14538445	27857630	17665038	0.00121951
sp|P20618|PSB1_HUMAN	FALSE	4.07143e+06	2.71081e+06	4138685	2603443	4.10174e+06	2.36243e+06	0.00121951
tr|Q5SZX6|Q5SZX6_HUMAN	FALSE	18605714	9934993	18346894	9823443	19603258	9656984	0
sp|P16949-2|STMN1_HUMAN;tr|A2A2D0|A2A2D0_HUMAN;sp|P16949|STMN1_HUMAN	FALSE	8099299	5.58038e+06	8255932	6.55185e+06	6.32278e+06	4.2089e+06	0.00121951
sp|P62899-2|RL31_HUMAN;tr|B7Z4C8|B7Z4C8_HUMAN;sp|P62899-3|RL31_HUMAN;tr|B7Z4E3|B7Z4E3_HUMAN;tr|C9JU56|C9JU56_HUMAN;sp|P62899|RL31_HUMAN;tr|H7C2W9|H7C2W9_HUMAN	FALSE	57241240	32916886	54545176	25270466	50381428	34853832	0.00121951
sp|P35268|RL22_HUMAN	FALSE	70873832	56055248	96580208	42674800	86171096	54626240	0.00121951
sp|Q9BYX7|ACTBM_HUMAN	FALSE	194173584	129345928	200128800	144841792	182953856	127382816	0
sp|P31948-3|STIP1_HUMAN;sp|P31948-2|STIP1_HUMAN;sp|P31948|STIP1_HUMAN	FALSE	15774411	10020350	16320182	10368686	14373168	8689486	0.00121951
XXX_sp|P52735-3|VAV2_HUMAN	TRUE	75596896	48574620	116674264	14740589	101309272	0	0.00345622
sp|P14866|HNRPL_HUMAN;tr|M0QXS5|M0QXS5_HUMAN;tr|A0A3B3ITJ4|A0A3B3ITJ4_HUMAN;sp|P14866-2|HNRPL_HUMAN;tr|M0QYT0|M0QYT0_HUMAN	FALSE	7.18331e+06	5.61498e+06	8377410	5.29366e+06	7.06401e+06	5715127	0
sp|Q15717|ELAV1_HUMAN;sp|Q15717-2|ELAV1_HUMAN	FALSE	8.17102e+06	4.37018e+06	5646825	3.78132e+06	6189554	3.03458e+06	0.00345622
sp|Q16629-4|SRSF7_HUMAN;sp|Q16629|SRSF7_HUMAN;sp|Q16629-2|SRSF7_HUMAN;tr|C9JAB2|C9JAB2_HUMAN;sp|Q16629-3|SRSF7_HUMAN;tr|A0A0B4J1Z1|A0A0B4J1Z1_HUMAN	FALSE	28771612	16145408	29796098	22887690	30603560	15709521	0
sp|O75347|TBCA_HUMAN;tr|E5RJD8|E5RJD8_HUMAN;tr|E5RIW3|E5RIW3_HUMAN;tr|E5RHG6|E5RHG6_HUMAN	FALSE	15153745	8.18702e+06	15785527	8926252	14297333	8892204	0.00121951
tr|X6RJP6|X6RJP6_HUMAN	FALSE	10163043	7.98845e+06	14070698	9273797	10528478	7406442	0
tr|I3L3P7|I3L3P7_HUMAN;sp|P62244|RS15A_HUMAN	FALSE	5.42189e+06	3.77212e+06	5515991	2878798	4.34822e+06	2891384	0
tr|D6R9I7|D6R9I7_HUMAN;tr|D6RDJ2|D6RDJ2_HUMAN;tr|D6RIX0|D6RIX0_HUMAN	FALSE	2.44277e+06	1418711	2468292	842898	2.00267e+06	1068633	0.00121951
sp|Q14344|GNA13_HUMAN;sp|Q03113|GNA12_HUMAN	FALSE	8.03303e+06	4.44633e+06	7739930	3962942	7283399	3.65197e+06	0
sp|P36578|RL4_HUMAN	FALSE	54077892	34949604	57701164	35885824	52938084	31079284	0
tr|Q5VVC8|Q5VVC8_HUMAN;sp|P62913-2|RL11_HUMAN;sp|P62913|RL11_HUMAN	FALSE	98013064	65996760	100290368	68629960	106859248	63029756	0
sp|P34897-3|GLYM_HUMAN;sp|P34897|GLYM_HUMAN;tr|G3V2Y4|G3V2Y4_HUMAN	FALSE	23043986	14558312	23290472	13877785	22186810	14445099	0.00121951
tr|A0A0A0MRL0|A0A0A0MRL0_HUMAN;sp|Q12905|ILF2_HUMAN;tr|X6R6Z1|X6R6Z1_HUMAN;tr|B4DY09|B4DY09_HUMAN	FALSE	18141446	9958630	17659246	8464551	19479202	11638391	0
sp|P06748-2|NPM_HUMAN;sp|P06748|NPM_HUMAN	FALSE	300012448	200523280	301785024	151007168	273014304	167563072	0
sp|Q15084-5|PDIA6_HUMAN;sp|Q15084|PDIA6_HUMAN;sp|Q15084-2|PDIA6_HUMAN;sp|Q15084-4|PDIA6_HUMAN;sp|Q15084-3|PDIA6_HUMAN	FALSE	80221424	60648056	80570232	53185912	77756864	40713012	0
sp|P61981|1433G_HUMAN	FALSE	6.41955e+06	3659257	5954953	3.34127e+06	4.91241e+06	2.71316e+06	0
sp|P50395|GDIB_HUMAN;sp|P50395-2|GDIB_HUMAN	FALSE	9088750	6.72406e+06	10541646	9201449	9256863	6.25452e+06	0.00121951
tr|G5E9G0|G5E9G0_HUMAN;tr|B5MCW2|B5MCW2_HUMAN	FALSE	23930968	15364399	23737756	14438827	24229110	14531860	0
sp|P49368|TCPG_HUMAN;tr|B4DUR8|B4DUR8_HUMAN	FALSE	30671110	17909860	34078844	16446112	28351560	17199840	0.00121951
tr|M0R3D6|M0R3D6_HUMAN;tr|M0R1A7|M0R1A7_HUMAN	FALSE	6216974	4.06814e+06	6623763	3.01017e+06	6.38494e+06	3.56434e+06	0
sp|Q07021|C1QBP_HUMAN;tr|I3L3Q7|I3L3Q7_HUMAN;tr|I3L3B0|I3L3B0_HUMAN	FALSE	338738272	224907936	354139808	238882144	341009664	216381536	0
tr|E9PP50|E9PP50_HUMAN	FALSE	94026848	63905720	102344224	46064500	86299088	54105008	0
tr|E9PK25|E9PK25_HUMAN;sp|P23528|COF1_HUMAN;tr|G3V1A4|G3V1A4_HUMAN	FALSE	168712736	108021336	166710032	102526920	153767488	96824064	0
sp|P14618|KPYM_HUMAN	FALSE	256196880	173640896	257228288	169515792	253582032	159120192	0
tr|B8ZZL8|B8ZZL8_HUMAN	FALSE	18824228	10061741	16759735	8.38205e+06	18074550	9166813	0.00121951
sp|P31153|METK2_HUMAN	FALSE	21524678	9150284	14409547	10220758	14322238	8.37442e+06	0.00121951
tr|C9J7H8|C9J7H8_HUMAN	FALSE	8284308	5875014	9423168	4.66886e+06	9130591	6.12003e+06	0.00121951
sp|Q6PEY2|TBA3E_HUMAN	FALSE	18373778	14358735	19387154	10427050	18761492	10221738	0
sp|O75367|H2AY_HUMAN;tr|D6RCF2|D6RCF2_HUMAN;sp|O75367-2|H2AY_HUMAN;sp|O75367-3|H2AY_HUMAN	FALSE	14775956	48411476	51827288	49881776	55122488	16047890	0
sp|P22087|FBRL_HUMAN;tr|M0R299|M0R299_HUMAN;tr|M0R2Q4|M0R2Q4_HUMAN;tr|M0R0P1|M0R0P1_HUMAN;tr|M0QXL5|M0QXL5_HUMAN	FALSE	41411828	17181698	62715388	22238822	45202544	30172296	0.00121951
tr|G3V4N7|G3V4N7_HUMAN;sp|P12277|KCRB_HUMAN	FALSE	27545412	24280998	29869392	23815324	33636556	19119376	0.00121951
sp|Q13509-2|TBB3_HUMAN	FALSE	57854340	39936332	59918468	34005560	58543772	37719960	0
sp|P02545-5|LMNA_HUMAN;sp|P02545-4|LMNA_HUMAN	FALSE	45287360	27369528	35542628	24612044	33467146	18612198	0
tr|D6RFM3|D6RFM3_HUMAN;tr|D6R9T0|D6R9T0_HUMAN;tr|D6RDU3|D6RDU3_HUMAN;tr|D6RJ04|D6RJ04_HUMAN;tr|D6RIH9|D6RIH9_HUMAN;tr|D6RAM1|D6RAM1_HUMAN;tr|E7EQJ0|E7EQJ0_HUMAN	FALSE	9027158	5599899	6.84292e+06	6592589	8569310	4211420	0.00121951
tr|E9PPJ0|E9PPJ0_HUMAN;tr|E9PJT3|E9PJT3_HUMAN;tr|H0YCG1|H0YCG1_HUMAN;sp|Q13435|SF3B2_HUMAN;tr|E9PJ04|E9PJ04_HUMAN	FALSE	5.57001e+06	2.84923e+06	7724670	4237085	5.65917e+06	3113300	0.00121951
tr|J3KPX7|J3KPX7_HUMAN;sp|Q99623|PHB2_HUMAN;sp|Q99623-2|PHB2_HUMAN	FALSE	9813247	4534330	11898503	8417371	10376053	7.91665e+06	0.00121951
sp|P49773|HINT1_HUMAN	FALSE	24302790	10825428	25823098	12105465	17523218	14332178	0.00121951
sp|P22392-2|NDKB_HUMAN;tr|Q32Q12|Q32Q12_HUMAN;sp|P22392|NDKB_HUMAN	FALSE	32588704	16664184	28961450	15270525	26345566	17521216	0.00121951
sp|P45880-1|VDAC2_HUMAN;sp|P45880-2|VDAC2_HUMAN;sp|P45880|VDAC2_HUMAN;tr|A0A0A0MR02|A0A0A0MR02_HUMAN	FALSE	85935816	49833476	88851200	46217036	81757240	44224756	0
tr|E9PS50|E9PS50_HUMAN	FALSE	24466992	17411358	30422840	19071172	27613998	17749496	0.00121951
tr|M0R042|M0R042_HUMAN	FALSE	43275096	37678872	51906240	35347948	46477964	30455604	0.00345622
tr|C9JW96|C9JW96_HUMAN;tr|E9PCW0|E9PCW0_HUMAN	FALSE	29010378	19079568	31031748	20764104	27962408	14730770	0.00121951
sp|Q9NR30-2|DDX21_HUMAN;sp|Q9NR30|DDX21_HUMAN	FALSE	57700972	33348578	54413820	34059344	53818648	31512578	0
sp|Q16576|RBBP7_HUMAN;sp|Q16576-2|RBBP7_HUMAN;tr|E9PC52|E9PC52_HUMAN	FALSE	8787957	6661764	9555605	3.28473e+06	8.20949e+06	3.8184e+06	0
tr|E9PKU4|E9PKU4_HUMAN	FALSE	35826548	22309016	36290316	21486836	35213324	20252356	0
tr|A0A087WV22|A0A087WV22_HUMAN;tr|F8W7C6|F8W7C6_HUMAN	FALSE	7603686	4380843	8.08895e+06	4.42506e+06	8.16419e+06	4356592	0
tr|H0YKN4|H0YKN4_HUMAN;tr|H0YNB8|H0YNB8_HUMAN	FALSE	68092432	45478468	71746944	41522104	66399464	39266692	0
tr|C9J9K3|C9J9K3_HUMAN;tr|A0A0C4DG17|A0A0C4DG17_HUMAN;sp|P08865|RSSA_HUMAN	FALSE	58091744	37501180	61632128	50264204	77106744	52371340	0.00121951
sp|P22234|PUR6_HUMAN;tr|E9PBS1|E9PBS1_HUMAN;sp|P22234-2|PUR6_HUMAN	FALSE	39227580	23281390	38840592	22747464	34480708	21862926	0
tr|H0YDN1|H0YDN1_HUMAN	FALSE	7.61965e+06	4.60021e+06	7359497	3.95887e+06	8435030	4152792	0.00121951
tr|H0Y9Y4|H0Y9Y4_HUMAN;tr|D6R9B6|D6R9B6_HUMAN	FALSE	35350576	28726720	38422096	15020842	31042320	17729394	0
sp|P31040|SDHA_HUMAN;sp|P31040-3|SDHA_HUMAN;sp|P31040-2|SDHA_HUMAN;tr|A0A087X1I3|A0A087X1I3_HUMAN;tr|D6RFM5|D6RFM5_HUMAN	FALSE	59843304	32120262	64812524	36276752	57283464	40855316	0
tr|H7C5W5|H7C5W5_HUMAN;sp|P41219-2|PERI_HUMAN;sp|P41219|PERI_HUMAN	FALSE	92869304	50185352	91129264	59558556	80277840	50301524	0.00121951
tr|V9GZ17|V9GZ17_HUMAN	FALSE	242609840	162177424	272444000	137057712	238050992	162892128	0.00121951
sp|Q09666|AHNK_HUMAN	FALSE	30581632	17491502	32872742	15005745	27907652	17695958	0
tr|F5GZI8|F5GZI8_HUMAN;tr|F5H676|F5H676_HUMAN;tr|F5H726|F5H726_HUMAN	FALSE	19595064	13003769	22814540	5.05741e+06	21462042	7261682	0.00345622
tr|H3BR68|H3BR68_HUMAN;sp|P04075|ALDOA_HUMAN;tr|J3KPS3|J3KPS3_HUMAN;sp|P04075-2|ALDOA_HUMAN	FALSE	29678790	19487582	30043082	19914920	29250928	22917706	0.00121951
sp|P04350|TBB4A_HUMAN	FALSE	22000820	16612679	27682712	20546840	27059682	16544622	0
tr|F8VW21|F8VW21_HUMAN	FALSE	26240004	15733159	27795808	17366480	29659990	16613529	0
tr|A0A0A0MT12|A0A0A0MT12_HUMAN;tr|F6S4E6|F6S4E6_HUMAN;tr|F6TRA5|F6TRA5_HUMAN;tr|F6WLT2|F6WLT2_HUMAN	FALSE	2.56729e+06	1.96231e+06	4.10531e+06	1.87285e+06	2.6617e+06	3.06531e+06	0.00681818
tr|H7BXF3|H7BXF3_HUMAN;tr|H7C2L4|H7C2L4_HUMAN	FALSE	4187052	2.33006e+06	4.57311e+06	2929836	5.44575e+06	3.13338e+06	0
tr|D6R909|D6R909_HUMAN;tr|D6RGK8|D6RGK8_HUMAN;tr|D6REE5|D6REE5_HUMAN	FALSE	18412660	12799032	19195702	11935793	17964930	10871968	0
sp|P62280|RS11_HUMAN	FALSE	13880930	8129441	12764924	10371049	12739014	6.91762e+06	0.00121951
sp|P52292|IMA1_HUMAN;tr|J3QLL0|J3QLL0_HUMAN;tr|J3KS65|J3KS65_HUMAN	FALSE	8939404	5.60217e+06	9174542	6.32681e+06	8485075	6.44255e+06	0.00121951
tr|K7EPM1|K7EPM1_HUMAN;tr|F5H1C3|F5H1C3_HUMAN;tr|E5RG95|E5RG95_HUMAN;tr|K7EKN2|K7EKN2_HUMAN;tr|E5RGZ4|E5RGZ4_HUMAN;tr|E5RI09|E5RI09_HUMAN;sp|P09104|ENOG_HUMAN;sp|P09104-2|ENOG_HUMAN;tr|F5H0C8|F5H0C8_HUMAN	FALSE	47048900	16598289	37372716	30530628	32517706	22267412	0
tr|F8VR77|F8VR77_HUMAN;sp|Q9UQ80|PA2G4_HUMAN;sp|Q9UQ80-2|PA2G4_HUMAN	FALSE	14990156	9824957	12825176	8.14027e+06	13211047	8893060	0.00121951
sp|P62314|SMD1_HUMAN;tr|J3QLI9|J3QLI9_HUMAN	FALSE	50737056	32447766	53599540	29221676	50252996	36700288	0.00121951
sp|P07910-3|HNRPC_HUMAN	FALSE	12138775	8400587	11199353	5.12367e+06	10536004	6.50618e+06	0
sp|P30613-2|KPYR_HUMAN;sp|P30613|KPYR_HUMAN	FALSE	49472068	32151576	47258976	30716878	44925624	25230808	0
tr|D6RC06|D6RC06_HUMAN	FALSE	46185476	27135186	42260088	26161558	45073540	25205550	0
tr|D3YTI8|D3YTI8_HUMAN	FALSE	13403549	8807104	13650987	7.29341e+06	12883439	7852557	0.00121951
tr|G3V4M8|G3V4M8_HUMAN	FALSE	47339192	32151212	55815144	37592824	53371048	34210204	0.00121951
sp|Q99879|H2B1M_HUMAN;sp|Q99877|H2B1N_HUMAN;sp|Q5QNW6|H2B2F_HUMAN;sp|Q5QNW6-2|H2B2F_HUMAN;tr|U3KQK0|U3KQK0_HUMAN;sp|P62807|H2B1C_HUMAN;sp|Q93079|H2B1H_HUMAN;sp|P58876|H2B1D_HUMAN;sp|Q99880|H2B1L_HUMAN	FALSE	41967216	25804162	41491092	22885730	38773820	25876194	0
sp|P07237|PDIA1_HUMAN;tr|H7BZ94|H7BZ94_HUMAN	FALSE	38419300	26875262	36889248	19640710	36336784	21237348	0.00121951
tr|A0A2C9F2M7|A0A2C9F2M7_HUMAN;tr|A0A286YF22|A0A286YF22_HUMAN;sp|O43175|SERA_HUMAN	FALSE	20200874	11252316	18261278	11936920	15704221	10604615	0
sp|P49368-2|TCPG_HUMAN	FALSE	33836224	24723112	33745460	20924566	34172540	19902020	0.00121951
tr|E9PPY6|E9PPY6_HUMAN	FALSE	58771872	36818120	62948648	31191512	53823304	32239898	0
sp|P35241-5|RADI_HUMAN;tr|A0A2R8Y7M3|A0A2R8Y7M3_HUMAN;tr|A0A2R8Y5S7|A0A2R8Y5S7_HUMAN;sp|P35241|RADI_HUMAN	FALSE	5.97296e+06	3.84299e+06	6.13876e+06	3.19153e+06	6.65509e+06	3.37945e+06	0.00121951
tr|H3BUW1|H3BUW1_HUMAN;tr|H3BTJ2|H3BTJ2_HUMAN;tr|H3BT25|H3BT25_HUMAN	FALSE	10457585	7.38292e+06	10013387	6098897	9337956	6689633	0.00121951
tr|F8VP67|F8VP67_HUMAN	FALSE	8493788	6.78656e+06	8.3648e+06	7.4549e+06	8.27033e+06	6269139	0.00121951
sp|P39023|RL3_HUMAN	FALSE	14169293	10065074	13664444	6893151	13226321	7708778	0
tr|H0YFS2|H0YFS2_HUMAN	FALSE	19360198	9958938	15342013	9528205	14394505	8467087	0.00240964
sp|P06733-2|ENOA_HUMAN	FALSE	402362976	237350064	380596352	149933136	336757248	223101744	0
sp|P11142-2|HSP7C_HUMAN	FALSE	38435652	26595606	39529608	27664626	37910188	23223526	0
sp|P62701|RS4X_HUMAN	FALSE	67284032	42490500	68805240	41258236	65659256	38447760	0
sp|Q14974|IMB1_HUMAN	FALSE	12076917	8.165e+06	11652503	7209414	11414713	6740638	0
tr|F5GWF6|F5GWF6_HUMAN	FALSE	21112312	11558321	18470384	10121780	18750318	10475144	0.00121951
sp|P22492|H1T_HUMAN	FALSE	53540232	37602660	63021020	44071116	65703144	41364580	0.00121951
sp|P25398|RS12_HUMAN	FALSE	103408352	71883440	114178352	68345824	109430176	64026068	0
sp|Q99832-2|TCPH_HUMAN	FALSE	55575544	49193924	69428744	43008464	64894156	44735928	0.00121951
sp|P54819-5|KAD2_HUMAN;sp|P54819-2|KAD2_HUMAN;tr|F8W1A4|F8W1A4_HUMAN;sp|P54819|KAD2_HUMAN	FALSE	17456938	13967157	20273698	12879763	18005970	12305637	0.00121951
sp|P10809|CH60_HUMAN	FALSE	790753792	499499040	829138816	456792128	761169024	471423008	0
tr|F8WE04|F8WE04_HUMAN	FALSE	68353920	42725156	66213580	42749624	68386960	42065432	0
tr|A8MUA9|A8MUA9_HUMAN;sp|P61956|SUMO2_HUMAN;sp|P55854|SUMO3_HUMAN;sp|P61956-2|SUMO2_HUMAN;sp|P55854-2|SUMO3_HUMAN;sp|Q6EEV6|SUMO4_HUMAN;tr|A8MU27|A8MU27_HUMAN	FALSE	10410949	6914821	11333320	6195999	11745295	6.1975e+06	0
sp|P40227-2|TCPZ_HUMAN	FALSE	58207652	35121244	54291856	29739592	49866192	30725716	0
sp|P08621|RU17_HUMAN;tr|M0QYR1|M0QYR1_HUMAN;sp|P08621-2|RU17_HUMAN;sp|P08621-3|RU17_HUMAN	FALSE	4248212	2.56406e+06	4.82137e+06	2.35736e+06	4.38009e+06	4.30373e+06	0.00121951
tr|M0QYM7|M0QYM7_HUMAN	FALSE	55933084	70440216	71600472	85735848	60583888	80952488	0.00121951
sp|P15259|PGAM2_HUMAN	FALSE	38741252	25760382	38698948	24457226	34630972	23740460	0.00121951
sp|P17987|TCPA_HUMAN	FALSE	38693208	23407790	32847244	21819846	34371764	21074792	0
tr|A0A087WTT1|A0A087WTT1_HUMAN;tr|E7ERJ7|E7ERJ7_HUMAN;sp|P11940-2|PABP1_HUMAN;sp|P11940|PABP1_HUMAN	FALSE	1.53863e+06	1.12033e+06	1.74745e+06	1.02837e+06	1.73195e+06	1.07326e+06	0.00121951
tr|Q5RI18|Q5RI18_HUMAN	FALSE	36335172	23241902	37770108	23540940	38179556	22502946	0
tr|H3BM89|H3BM89_HUMAN	FALSE	75220120	43386620	70930480	50021920	65934232	45964956	0
sp|Q07020-2|RL18_HUMAN;tr|J3QQ67|J3QQ67_HUMAN;tr|H0YHA7|H0YHA7_HUMAN;tr|F8VUA6|F8VUA6_HUMAN;sp|Q07020|RL18_HUMAN	FALSE	17362948	11731761	18090232	8418578	14726098	8952494	0
sp|Q9NQH7|XPP3_HUMAN;sp|Q9NQH7-5|XPP3_HUMAN;sp|Q9NQH7-3|XPP3_HUMAN;sp|Q9NQH7-2|XPP3_HUMAN;sp|Q9NQH7-4|XPP3_HUMAN	FALSE	23211070	13440658	25257544	16552773	23258192	14542330	0.00121951
sp|P51991|ROA3_HUMAN;sp|P51991-2|ROA3_HUMAN	FALSE	61750864	39233960	55591284	28186160	65635724	34498012	0.00121951
tr|H0Y8C6|H0Y8C6_HUMAN;sp|O00410-3|IPO5_HUMAN;sp|O00410-2|IPO5_HUMAN;sp|O00410|IPO5_HUMAN	FALSE	2930771	1.78444e+06	2572760	1.56197e+06	2.91782e+06	1587253	0.00121951
sp|P26373-2|RL13_HUMAN	FALSE	23635138	15398113	24716586	13493216	23256146	16819286	0.00121951
sp|P25705|ATPA_HUMAN;sp|P25705-2|ATPA_HUMAN	FALSE	29173876	16597040	31853680	19370292	31249874	16807530	0
sp|Q14568|HS902_HUMAN	FALSE	6.29981e+06	4.10818e+06	6.51866e+06	4.46376e+06	7680702	4.25038e+06	0
tr|D6RIT2|D6RIT2_HUMAN	FALSE	4277596	2.68438e+06	4.24556e+06	3.28142e+06	4409000	2.69651e+06	0
sp|O00567|NOP56_HUMAN;tr|H0YDU4|H0YDU4_HUMAN;tr|H0Y653|H0Y653_HUMAN	FALSE	4.11324e+06	2761929	4896105	449373	5681122	3643626	0.00121951
tr|E9PM13|E9PM13_HUMAN	FALSE	4.15872e+06	2.82442e+06	4926018	1.5134e+06	4624060	2.7128e+06	0.00121951
tr|F5GWA7|F5GWA7_HUMAN	FALSE	10722777	6618442	10310450	5.38049e+06	8684422	5336822	0.00121951
sp|Q14847|LASP1_HUMAN;sp|Q14847-2|LASP1_HUMAN;tr|C9J9W2|C9J9W2_HUMAN	FALSE	2.08986e+06	1.18628e+06	1.88863e+06	1179441	1.9023e+06	1.20375e+06	0.00121951
sp|P55072|TERA_HUMAN	FALSE	116397736	78835824	133618840	76816448	122440776	67552056	0
tr|B1AHD1|B1AHD1_HUMAN;sp|P55769|NH2L1_HUMAN;tr|A0A3B3IUA2|A0A3B3IUA2_HUMAN	FALSE	11096224	6.41228e+06	11640915	5.83336e+06	9996801	6.80725e+06	0
tr|E9PK86|E9PK86_HUMAN;tr|E9PQ34|E9PQ34_HUMAN;tr|E9PRS3|E9PRS3_HUMAN;tr|E9PNX1|E9PNX1_HUMAN;tr|E9PPV6|E9PPV6_HUMAN;tr|E9PJH8|E9PJH8_HUMAN;tr|E9PMI5|E9PMI5_HUMAN;tr|E9PR70|E9PR70_HUMAN;tr|E9PIG2|E9PIG2_HUMAN	FALSE	24733904	12902243	23515058	21193086	17339998	16224192	0.00121951
sp|Q58FF7|H90B3_HUMAN	FALSE	55912432	38553072	61960832	35911632	56199828	37339128	0.00121951
sp|P62277|RS13_HUMAN	FALSE	39324760	23265530	39613712	25843290	40050376	24487734	0
sp|Q9H853|TBA4B_HUMAN	FALSE	48435640	39386056	59776792	47654908	53736408	45398560	0
sp|O43707-2|ACTN4_HUMAN;sp|O43707-3|ACTN4_HUMAN;tr|F5GXS2|F5GXS2_HUMAN;sp|O43707|ACTN4_HUMAN	FALSE	13229884	7453497	12366079	7.31223e+06	11793936	6.74782e+06	0.00121951
tr|A6QRI9|A6QRI9_HUMAN;tr|B8A6G2|B8A6G2_HUMAN	FALSE	5.26651e+06	3.96872e+06	5.06307e+06	2.45455e+06	5130944	3297336	0.00121951
sp|P46778|RL21_HUMAN	FALSE	37958088	24490950	37359268	22523136	35542500	21794530	0
sp|P26639-2|SYTC_HUMAN	FALSE	21368348	9344999	7.97416e+06	3.43796e+06	7.30879e+06	2449908	0
tr|Q5JP53|Q5JP53_HUMAN	FALSE	234100224	117770408	259370624	149866848	185019632	168019600	0.00121951
sp|P22626-2|ROA2_HUMAN	FALSE	180552672	115651248	177249376	98972200	163259504	98067920	0
sp|P37802-2|TAGL2_HUMAN;sp|P37802|TAGL2_HUMAN	FALSE	17431532	13652976	17156020	12250912	14146546	10091605	0.00121951
sp|Q15181|IPYR_HUMAN	FALSE	4124104	2.16609e+06	4470278	2471841	4760092	2.04317e+06	0
tr|V9GYG0|V9GYG0_HUMAN;sp|P12235|ADT1_HUMAN	FALSE	32217376	22856712	35148364	24493528	35195708	21589372	0.00121951
sp|Q99460-2|PSMD1_HUMAN;tr|H7C378|H7C378_HUMAN;tr|A0A087WW66|A0A087WW66_HUMAN;sp|Q99460|PSMD1_HUMAN	FALSE	1.48869e+06	1.05496e+06	1.18381e+06	1.20515e+06	1.03088e+06	1.27123e+06	0.00345622
tr|A0A0D9SF20|A0A0D9SF20_HUMAN;tr|A0A087WUW5|A0A087WUW5_HUMAN	FALSE	6.37978e+06	4.331e+06	7.00801e+06	3.81431e+06	6423122	4.3673e+06	0.00121951
tr|K7EK07|K7EK07_HUMAN;sp|P84243|H33_HUMAN	FALSE	176812544	109348216	173312016	72754584	163587424	112748312	0.00121951
sp|P13929-2|ENOB_HUMAN;sp|P13929|ENOB_HUMAN;sp|P13929-3|ENOB_HUMAN	FALSE	148137456	107770352	145689808	97540632	143583152	82689456	0
sp|P39019|RS19_HUMAN	FALSE	56209780	36413024	56017800	31755542	53004892	31847474	0
sp|P62081|RS7_HUMAN;tr|B5MCP9|B5MCP9_HUMAN	FALSE	92596752	62242728	92245104	57701304	85152640	47827148	0
sp|P60709|ACTB_HUMAN;sp|P63261|ACTG_HUMAN	FALSE	924860288	668029504	1026079872	667820736	987644736	625866240	0
tr|C9JA36|C9JA36_HUMAN;tr|H7C4L9|H7C4L9_HUMAN;sp|P54709-2|AT1B3_HUMAN;sp|P54709|AT1B3_HUMAN	FALSE	6043784	4.0337e+06	5.01628e+06	3.50954e+06	6.67854e+06	2937099	0
tr|D6REP8|D6REP8_HUMAN;tr|D6RE99|D6RE99_HUMAN;tr|D6RD60|D6RD60_HUMAN	FALSE	50505988	43376592	56997376	31674966	54694920	41580140	0.00121951
sp|Q9BRL6-2|SRSF8_HUMAN;sp|Q9BRL6|SRSF8_HUMAN	FALSE	16642503	10296593	16325294	10647252	15982506	10112251	0.00121951
tr|G3V203|G3V203_HUMAN	FALSE	38039436	23543286	38480972	25105546	39525116	27190936	0.00121951
sp|P60981|DEST_HUMAN;sp|P60981-2|DEST_HUMAN;tr|F6RFD5|F6RFD5_HUMAN	FALSE	28099674	16194744	26669672	12249640	25187078	16929938	0
tr|A6NL76|A6NL76_HUMAN	FALSE	163315872	105645120	172042912	96310128	172912448	107713072	0
tr|B0YJC4|B0YJC4_HUMAN	FALSE	322464288	206917072	314904640	215994672	300487072	196375632	0
tr|H0Y6E7|H0Y6E7_HUMAN;tr|H3BT71|H3BT71_HUMAN;sp|P38159-2|RBMX_HUMAN;sp|P38159|RBMX_HUMAN	FALSE	19892368	11439849	18190234	10421016	18449428	10725296	0
sp|P63104|1433Z_HUMAN	FALSE	32791764	19268874	34069488	18418192	33829396	21178570	0
tr|G3V5Z7|G3V5Z7_HUMAN;sp|P60900|PSA6_HUMAN	FALSE	13956311	8.19969e+06	10746838	7.72921e+06	10155217	6330419	0.00121951
sp|P46781|RS9_HUMAN;tr|A0A024R4M0|A0A024R4M0_HUMAN	FALSE	17863820	12949945	19627528	11301325	19364896	10740230	0
tr|K7ERI7|K7ERI7_HUMAN;tr|K7EMH1|K7EMH1_HUMAN	FALSE	14390946	9990342	14876858	10185431	16540942	9528871	0.00121951
sp|Q08J23-3|NSUN2_HUMAN;sp|Q08J23-2|NSUN2_HUMAN;sp|Q08J23|NSUN2_HUMAN	FALSE	3.06399e+06	2.26198e+06	4.52974e+06	1.81059e+06	3055702	2.07289e+06	0.00121951
tr|Q5VU61|Q5VU61_HUMAN	FALSE	22950810	10841745	22835056	13557383	24630874	13187070	0
tr|H0YM50|H0YM50_HUMAN	FALSE	3.11527e+06	2.11143e+06	3.77951e+06	4.95194e+06	4405686	2.17268e+06	0.00121951
tr|H7C123|H7C123_HUMAN;tr|H7C2C5|H7C2C5_HUMAN	FALSE	11762435	7.32043e+06	12667533	5.61317e+06	11135398	7099213	0.00121951
sp|P60900-2|PSA6_HUMAN	FALSE	4356628	3.29764e+06	3.97351e+06	3.12121e+06	4693106	2343918	0.00121951
tr|D6RBD0|D6RBD0_HUMAN	FALSE	32847796	19894180	32305088	19933318	29681956	19785244	0
tr|E5RH77|E5RH77_HUMAN	FALSE	17131978	9739739	15641963	8067688	15326159	7.01247e+06	0
sp|Q13162|PRDX4_HUMAN;tr|A6NG45|A6NG45_HUMAN	FALSE	21059716	10592563	18536138	10454976	18130778	15216453	0.00121951
tr|E9PP36|E9PP36_HUMAN	FALSE	10845563	7.36621e+06	11762139	7098259	11518493	7540553	0
tr|F8W079|F8W079_HUMAN	FALSE	29154034	17164202	27413422	16934936	26500262	33264882	0.00121951
tr|J3QSF1|J3QSF1_HUMAN	FALSE	21387850	11568862	22295324	15127601	23756390	14125776	0
sp|P60842-2|IF4A1_HUMAN;tr|J3QL43|J3QL43_HUMAN;tr|J3KT12|J3KT12_HUMAN;tr|J3QS69|J3QS69_HUMAN	FALSE	25428754	14641326	24527766	14243846	22031874	11826145	0
tr|F8VPD4|F8VPD4_HUMAN;sp|P27708|PYR1_HUMAN	FALSE	11316564	7612091	12185513	5864167	11194705	8191419	0.00121951
sp|P07355-2|ANXA2_HUMAN;sp|P07355|ANXA2_HUMAN	FALSE	32799440	22452834	31687890	27051212	27203036	17806502	0.00121951
sp|P40429|RL13A_HUMAN;tr|M0QYS1|M0QYS1_HUMAN	FALSE	35218232	20415298	34462472	23148936	35127264	24477578	0.00121951
tr|H0YAR2|H0YAR2_HUMAN;tr|H0YB86|H0YB86_HUMAN	FALSE	14398728	9599055	14513851	10498042	15399267	7.1872e+06	0
tr|H3BQ34|H3BQ34_HUMAN	FALSE	243508992	155402304	250348064	137274256	238256256	142561552	0
tr|F8WAX4|F8WAX4_HUMAN	FALSE	3427989	2.30396e+06	4008761	4.71314e+06	3.96215e+06	2.38089e+06	0.00121951
tr|E5RGE1|E5RGE1_HUMAN	FALSE	957170	685734	996641	1.31893e+06	1066637	631192	0.00121951
sp|Q9Y265-2|RUVB1_HUMAN;sp|Q9Y265|RUVB1_HUMAN	FALSE	2.90563e+06	5735433	8132366	6.88527e+06	8.02339e+06	5.44122e+06	0
sp|P23396-2|RS3_HUMAN;tr|H0YCJ7|H0YCJ7_HUMAN;sp|P23396|RS3_HUMAN;tr|F2Z2S8|F2Z2S8_HUMAN	FALSE	20378894	12466253	23021530	15954441	25101814	11676174	0.00121951
sp|P60866-2|RS20_HUMAN;sp|P60866|RS20_HUMAN	FALSE	46800168	29037130	45644576	27062616	47324660	27134782	0
tr|Q5T3N0|Q5T3N0_HUMAN;tr|Q5T3N1|Q5T3N1_HUMAN;sp|P04083|ANXA1_HUMAN	FALSE	10182222	5341744	9002874	3295742	7.21612e+06	4.37481e+06	0.00121951
tr|C9JDS9|C9JDS9_HUMAN	FALSE	115263672	80924864	120383240	87216600	112736456	75209584	0.00121951
sp|P06733|ENOA_HUMAN	FALSE	276826752	167430944	238216704	143880736	263242272	154015008	0
tr|U3KQ48|U3KQ48_HUMAN;sp|O00566|MPP10_HUMAN	FALSE	179625	3.83053e+06	2.69001e+06	4.09853e+06	2.43521e+06	3.73202e+06	0.00345622
sp|P61254|RL26_HUMAN;tr|J3QQQ9|J3QQQ9_HUMAN;tr|J3QRI7|J3QRI7_HUMAN;tr|J3QQV1|J3QQV1_HUMAN	FALSE	12889915	8075352	12297595	8094203	12405799	7055289	0
tr|I3L0K7|I3L0K7_HUMAN;tr|I3L239|I3L239_HUMAN	FALSE	159693904	100273024	160164032	107331128	148457056	99554688	0
tr|F6WQW2|F6WQW2_HUMAN;sp|P43487-2|RANG_HUMAN;tr|C9JXG8|C9JXG8_HUMAN;tr|C9JGV6|C9JGV6_HUMAN;sp|P43487|RANG_HUMAN	FALSE	8511225	4.95083e+06	8525170	2509157	3.60809e+06	3271476	0
XXX_tr|A0A1C7CYW8|A0A1C7CYW8_HUMAN;XXX_sp|Q8IVF4|DYH10_HUMAN;XXX_sp|Q8IVF4-2|DYH10_HUMAN;XXX_tr|A0A087WV07|A0A087WV07_HUMAN	TRUE	9150141	13993767	8.32944e+06	0	0	1.08963	0.00571429
sp|P31327-3|CPSM_HUMAN;sp|P31327|CPSM_HUMAN	FALSE	21090370	15148386	25964524	16475151	25150194	15096644	0
tr|I3L312|I3L312_HUMAN	FALSE	13551125	8342408	11806393	5219521	10283886	7715332	0.00121951
sp|P0CG38|POTEI_HUMAN	FALSE	2453565	1.40966e+06	2.31862e+06	1.52715e+06	2.58108e+06	1.52536e+06	0.00121951
tr|A0A1W2PRP1|A0A1W2PRP1_HUMAN	FALSE	31839058	17207418	33633708	21793736	3.3055e+06	5243921	0.00901917
sp|P14618-3|KPYM_HUMAN	FALSE	61201748	41727724	64991240	38144184	64409716	38127712	0.00121951
sp|P63173|RL38_HUMAN	FALSE	27657808	16656904	26895822	11127655	25884158	15974997	0
sp|Q71UI9-3|H2AV_HUMAN;sp|Q71UI9-4|H2AV_HUMAN	FALSE	12792588	6483425	11465774	4.95021e+06	12594330	6835626	0
sp|P63220|RS21_HUMAN;tr|Q8WVC2|Q8WVC2_HUMAN	FALSE	9790512	6013882	11006830	7286211	12233851	8.38773e+06	0.00121951
sp|P22090|RS4Y1_HUMAN;tr|C9JEH7|C9JEH7_HUMAN	FALSE	13114067	7591067	11849346	6978491	13081905	8568163	0.00121951
tr|E7EQR4|E7EQR4_HUMAN;sp|P15311|EZRI_HUMAN	FALSE	9420460	6.97405e+06	10894601	4249793	9562445	7871735	0.00121951
tr|Q5SQY0|Q5SQY0_HUMAN;sp|A6NNZ2|TBB8L_HUMAN;tr|A0A075B736|A0A075B736_HUMAN	FALSE	12077499	63307744	85861680	96800424	82095328	110423448	0.00121951
tr|E9PK01|E9PK01_HUMAN;tr|A0A087X1X7|A0A087X1X7_HUMAN;tr|E9PRY8|E9PRY8_HUMAN;sp|P29692-2|EF1D_HUMAN;sp|P29692|EF1D_HUMAN	FALSE	3.25412e+06	2.0057e+06	3.12752e+06	1.94286e+06	2.78842e+06	2.34298e+06	0.00121951
sp|P62995|TRA2B_HUMAN;sp|P62995-3|TRA2B_HUMAN	FALSE	14301787	8511504	14709645	7282876	11245040	12403516	0.00121951
tr|H0YE72|H0YE72_HUMAN;tr|H0YE58|H0YE58_HUMAN;tr|E9PQC9|E9PQC9_HUMAN	FALSE	23439870	9656854	19414718	9180988	14195816	7.39305e+06	0
sp|Q13200-3|PSMD2_HUMAN;sp|Q13200|PSMD2_HUMAN	FALSE	33770316	11019825	34291524	22407166	33407976	20412114	0
tr|C9J0S9|C9J0S9_HUMAN	FALSE	156379392	102066528	160100384	101502632	147545072	94122464	0
sp|Q00839|HNRPU_HUMAN;tr|A0A1W2PPS1|A0A1W2PPS1_HUMAN;sp|Q00839-2|HNRPU_HUMAN	FALSE	10722440	6.12245e+06	11704647	4442273	10413215	6.40018e+06	0.00121951
tr|J3KSS0|J3KSS0_HUMAN	FALSE	23140484	14301817	22231902	14146386	22381064	14974548	0
sp|Q2VIR3|IF2GL_HUMAN;sp|Q2VIR3-2|IF2GL_HUMAN;sp|P41091|IF2G_HUMAN;tr|H7BZU1|H7BZU1_HUMAN	FALSE	6.93079e+06	5094302	7.97836e+06	4448337	7224536	4587595	0
tr|M0R0Y6|M0R0Y6_HUMAN	FALSE	6117376	2.98809e+06	5005877	3158312	4.69571e+06	2.31032e+06	0
tr|F8VZ45|F8VZ45_HUMAN;tr|U3KQR5|U3KQR5_HUMAN;tr|F8VR69|F8VR69_HUMAN	FALSE	34671280	19568424	38711348	23853202	35513304	21513614	0
tr|S4R3N1|S4R3N1_HUMAN	FALSE	56546280	35904680	55592540	31542064	54558732	33330932	0
tr|I3L404|I3L404_HUMAN;tr|E9PM36|E9PM36_HUMAN	FALSE	28858210	16159978	25531360	18247376	28725222	17076834	0
tr|A0A087X0X3|A0A087X0X3_HUMAN;sp|P52272|HNRPM_HUMAN;sp|P52272-2|HNRPM_HUMAN	FALSE	16716427	8726352	16125110	12762735	15589247	7.75848e+06	0
tr|H0YEQ8|H0YEQ8_HUMAN	FALSE	20644060	13345585	14684075	11438096	17078244	10697104	0
tr|K7EK77|K7EK77_HUMAN	FALSE	46257828	31522462	45234792	25121936	44515296	28677932	0
sp|A6NHG4|DDTL_HUMAN	FALSE	6409573	48709704	15994937	9634194	46233556	17544344	0.00681818
tr|A0A2R8Y6I8|A0A2R8Y6I8_HUMAN	FALSE	64840856	37214932	56931924	33857164	53520424	35685948	0
tr|D6RED7|D6RED7_HUMAN	FALSE	2.26151e+06	2.11595e+06	4026195	2.90556e+06	3.73518e+06	1738738	0.00121951
tr|C9IZL7|C9IZL7_HUMAN	FALSE	17275580	9900171	8211765	10771052	11789586	7313944	0
sp|O00303|EIF3F_HUMAN;tr|H0YDT6|H0YDT6_HUMAN	FALSE	18419716	13025400	23099018	16523128	23830254	16612250	0
tr|K7EJ44|K7EJ44_HUMAN	FALSE	87041456	51640900	79586016	44297536	76417216	47924080	0
sp|Q6NVV1|R13P3_HUMAN	FALSE	26292312	17250830	26148598	13757038	22194252	13565676	0
tr|A0A3B3IS95|A0A3B3IS95_HUMAN	FALSE	45014752	19412012	54926656	20886774	37448976	22266860	0
sp|Q99497|PARK7_HUMAN;tr|K7ELW0|K7ELW0_HUMAN	FALSE	9991733	7024493	11548585	6194284	10424258	5978974	0.00121951
sp|P30044-2|PRDX5_HUMAN;sp|P30044|PRDX5_HUMAN	FALSE	3.78119e+06	3.44432e+06	16520810	9075749	17551698	12931769	0.00121951
tr|F5GZI0|F5GZI0_HUMAN	FALSE	39641488	27257028	48753704	29501620	45254352	27401430	0.00121951
tr|E9PI65|E9PI65_HUMAN	FALSE	315266336	199042176	305440064	165168096	285781344	180645616	0
tr|J3QSB5|J3QSB5_HUMAN	FALSE	13584778	10630258	15463413	10429033	16367396	10349833	0.00121951
sp|P60842|IF4A1_HUMAN	FALSE	62750104	40596012	66145968	40586160	65390176	40756536	0.00121951
sp|Q01130-2|SRSF2_HUMAN;sp|Q01130|SRSF2_HUMAN;tr|J3QL05|J3QL05_HUMAN;tr|J3KP15|J3KP15_HUMAN	FALSE	9501715	5.58089e+06	10603930	5616820	9067629	5423567	0.00121951
sp|P12004|PCNA_HUMAN	FALSE	12698123	7366075	14450707	7.94445e+06	18181930	10170864	0
tr|E9PMM9|E9PMM9_HUMAN	FALSE	20684474	12211422	20033762	10937069	18009206	11513762	0.00121951
tr|Q5T8U2|Q5T8U2_HUMAN	FALSE	33908528	21442174	34170920	16711465	33198712	21279282	0
tr|A0A0G2JIW1|A0A0G2JIW1_HUMAN;sp|P0DMV9|HS71B_HUMAN;sp|P0DMV8|HS71A_HUMAN	FALSE	147045632	97140128	122480928	82223848	125750544	75264816	0
sp|P28066|PSA5_HUMAN	FALSE	27226842	16039836	26552438	15545369	28025678	17889772	0
sp|P30405-2|PPIF_HUMAN;tr|H0Y548|H0Y548_HUMAN;sp|P30405|PPIF_HUMAN;tr|R4GN99|R4GN99_HUMAN	FALSE	25795370	12821824	21724338	14034055	19137702	15266138	0
tr|A8K7Q2|A8K7Q2_HUMAN	FALSE	74682128	53054780	83307248	50831780	87790928	53960148	0
tr|J3QSB4|J3QSB4_HUMAN	FALSE	43131920	27016506	41655144	30766970	42308780	27016682	0.00121951
tr|B4DEB1|B4DEB1_HUMAN;tr|K7EMV3|K7EMV3_HUMAN;tr|K7ES00|K7ES00_HUMAN	FALSE	278088032	164972272	274276352	182093504	267642592	162879008	0
tr|Q5JR95|Q5JR95_HUMAN	FALSE	99320320	56515736	92821344	56432732	97668464	58357536	0
sp|Q32P51|RA1L2_HUMAN	FALSE	2473305	1.38619e+06	2.42725e+06	1.74777e+06	2258329	1.42037e+06	0
sp|P07954-2|FUMH_HUMAN;sp|P07954|FUMH_HUMAN	FALSE	13753731	10867382	17330294	9211849	15728035	11049926	0.00121951
tr|M0R1H5|M0R1H5_HUMAN	FALSE	44055892	28324374	44089984	30034320	44178864	26251966	0
tr|D6RA73|D6RA73_HUMAN	FALSE	29368658	19691776	29584560	18978822	27118926	15013503	0.00121951
tr|E9PFF2|E9PFF2_HUMAN	FALSE	67218064	42173900	67055828	42757256	64631188	39186852	0.00121951
sp|P68104|EF1A1_HUMAN;sp|Q5VTE0|EF1A3_HUMAN	FALSE	2003966336	1303938176	2024408960	1180181888	1910139648	1198221696	0
sp|P14678|RSMB_HUMAN;sp|P63162-2|RSMN_HUMAN;tr|S4R3P3|S4R3P3_HUMAN;sp|P63162|RSMN_HUMAN;sp|P14678-2|RSMB_HUMAN;tr|J3QLE5|J3QLE5_HUMAN;sp|P14678-3|RSMB_HUMAN;tr|J3KRY3|J3KRY3_HUMAN	FALSE	8968210	6271112	9293746	5482068	8551579	4757217	0.00121951
sp|P61313-2|RL15_HUMAN;tr|E7EX53|E7EX53_HUMAN;tr|A0A2R8Y738|A0A2R8Y738_HUMAN	FALSE	11195538	7838429	10085690	4.92935e+06	9973830	5705854	0
tr|M0QYF7|M0QYF7_HUMAN;tr|M0R2L9|M0R2L9_HUMAN;tr|M0R140|M0R140_HUMAN;tr|M0QXK4|M0QXK4_HUMAN	FALSE	16525007	52191756	41527788	48708860	28766264	219789	0.00345622
tr|E7EUT5|E7EUT5_HUMAN;sp|P04406|G3P_HUMAN;sp|P04406-2|G3P_HUMAN	FALSE	2336015360	1653110016	2544010496	1571662080	2354541568	1537657856	0
tr|A0A2R8Y879|A0A2R8Y879_HUMAN	FALSE	145863200	86417872	141834160	87785736	129401360	80268760	0
sp|Q8NC51|PAIRB_HUMAN;sp|Q8NC51-3|PAIRB_HUMAN	FALSE	5.20287e+06	3.3124e+06	5.20873e+06	2.74195e+06	4.90743e+06	2.92435e+06	0.00121951
sp|P07195|LDHB_HUMAN	FALSE	293012704	198821872	293408800	159726992	280245600	178002336	0
sp|Q14697-2|GANAB_HUMAN;tr|F5H6X6|F5H6X6_HUMAN;tr|E9PKU7|E9PKU7_HUMAN;sp|Q14697|GANAB_HUMAN	FALSE	11711634	6.01656e+06	10046386	7.19458e+06	11355961	5584123	0
sp|P11279|LAMP1_HUMAN	FALSE	9907918	5.26779e+06	8.01927e+06	3411504	6773558	4.83939e+06	0
tr|Q8J015|Q8J015_HUMAN	FALSE	14933541	5.09216e+06	8546451	3.53917e+06	7244483	3.92248e+06	0
sp|P18669|PGAM1_HUMAN	FALSE	39437412	31968494	43658704	26302410	46813440	28152888	0.00121951
sp|P22314-2|UBA1_HUMAN;sp|P22314|UBA1_HUMAN	FALSE	18536904	12151171	17585650	11560809	15742520	8344978	0.00121951
sp|P32119|PRDX2_HUMAN	FALSE	43482908	25026114	41534776	26165520	43171000	24374112	0
sp|P20290-2|BTF3_HUMAN;sp|P20290|BTF3_HUMAN	FALSE	72006568	45856948	72360520	39350060	65608960	41586348	0
sp|P26447|S10A4_HUMAN	FALSE	22947986	13111284	25338558	13308606	22366332	13260644	0
sp|P62258|1433E_HUMAN	FALSE	84716680	66510468	94985456	46438872	89617624	55422900	0
tr|F5H2I0|F5H2I0_HUMAN;sp|Q9UMS4|PRP19_HUMAN;tr|F5GY56|F5GY56_HUMAN	FALSE	1.09823e+06	711035	742491	272847	950770	128799	0.00345622
tr|A0A286YER3|A0A286YER3_HUMAN;tr|A0A286YFB2|A0A286YFB2_HUMAN;tr|A0A286YFC8|A0A286YFC8_HUMAN	FALSE	11854276	7.11479e+06	12348167	29311894	20434370	10754731	0
sp|Q6ZMR3|LDH6A_HUMAN;tr|A0A087WUM2|A0A087WUM2_HUMAN	FALSE	48211828	31083644	49228388	35540200	49156448	28984076	0.00121951
sp|P40926|MDHM_HUMAN	FALSE	51274616	29816120	51062160	29263354	47884908	29353858	0
tr|C9J3N8|C9J3N8_HUMAN	FALSE	32264568	21353706	36164784	24528498	31572080	21207130	0.00121951
sp|Q08211|DHX9_HUMAN	FALSE	13780179	6881680	12667378	6399191	10100759	4.47667e+06	0.00121951
sp|O60814|H2B1K_HUMAN	FALSE	196907568	120985736	192970768	116928752	183424688	112579232	0
sp|P26583|HMGB2_HUMAN	FALSE	24349392	13513126	22976880	11263217	19478384	12046654	0
sp|P62888|RL30_HUMAN;tr|E5RI99|E5RI99_HUMAN	FALSE	28159420	16257735	28285330	15697631	24370636	16578719	0
sp|P04792|HSPB1_HUMAN	FALSE	38762864	23150016	38138740	25203940	38277872	23188130	0.00121951
sp|P07437|TBB5_HUMAN	FALSE	494381568	264094544	514258208	306511328	452785440	284182880	0
tr|A0A2R8Y4A2|A0A2R8Y4A2_HUMAN	FALSE	12218672	6730540	10450766	4.303e+06	9311674	5291122	0
sp|P05023|AT1A1_HUMAN;sp|P05023-3|AT1A1_HUMAN;sp|P05023-4|AT1A1_HUMAN	FALSE	13804295	7.25993e+06	12867016	8284337	12798128	7.53897e+06	0.00121951
sp|Q3ZCM7|TBB8_HUMAN	FALSE	232380912	177386816	259987408	168150928	239305600	152574672	0
sp|P16403|H12_HUMAN	FALSE	7.30497e+06	4471548	7779448	4.08161e+06	7776466	4.41707e+06	0
tr|A0A1B0GVG8|A0A1B0GVG8_HUMAN	FALSE	115339304	53550156	90978416	60598224	93946728	55262284	0
tr|E9PLL6|E9PLL6_HUMAN;sp|P46776|RL27A_HUMAN	FALSE	55413372	41187532	59223124	34189744	51264092	29025124	0
tr|E9PQD7|E9PQD7_HUMAN	FALSE	39723076	27053162	40376624	21536214	39181384	23496648	0
sp|P49207|RL34_HUMAN	FALSE	36870288	26636948	36506872	20253326	38015600	20292296	0
sp|P31946|1433B_HUMAN;sp|P31946-2|1433B_HUMAN	FALSE	15901007	8309159	16113983	9260224	15151694	15306319	0.00121951
sp|P04908|H2A1B_HUMAN;sp|Q7L7L0|H2A3_HUMAN;sp|Q93077|H2A1C_HUMAN	FALSE	5176677	4216624	6119327	5.19657e+06	6563050	3.37398e+06	0
tr|F5H793|F5H793_HUMAN	FALSE	82723136	53551612	86668016	58653064	88117584	51748680	0.00121951
tr|E9PN91|E9PN91_HUMAN	FALSE	23154354	14031732	22366636	15186719	22240678	12764176	0.00121951
sp|Q8N0Y7|PGAM4_HUMAN	FALSE	22543692	16096149	29962092	21278496	27888144	17296296	0.00121951
tr|I3L4N8|I3L4N8_HUMAN	FALSE	286127616	187053968	278212000	163497504	260654960	152991648	0
sp|P0CG39|POTEJ_HUMAN	FALSE	20169078	56021236	108114384	91784424	105593240	66160212	0.00240964
sp|P53396|ACLY_HUMAN;sp|P53396-2|ACLY_HUMAN	FALSE	7872069	6.14749e+06	9786012	3.522e+06	8.07132e+06	4.7624e+06	0.00121951
tr|E9PKE3|E9PKE3_HUMAN	FALSE	130095992	77069456	122148040	64687264	119475384	71748248	0.00121951
tr|B4DJV2|B4DJV2_HUMAN;tr|A0A0C4DGI3|A0A0C4DGI3_HUMAN;tr|H0YIC4|H0YIC4_HUMAN;sp|O75390|CISY_HUMAN	FALSE	6.47511e+06	3.62203e+06	6210803	3.90581e+06	6266437	3.72697e+06	0.00121951
tr|A0A2R8Y7G9|A0A2R8Y7G9_HUMAN;sp|P0DPK5|H3X_HUMAN;sp|P0DPK2|H3Y_HUMAN	FALSE	65338228	42094580	69373248	54020672	85042224	52426232	0.00121951
sp|P25705-3|ATPA_HUMAN	FALSE	52825008	39448696	61168928	44146124	58915756	38337096	0
tr|H0YIN7|H0YIN7_HUMAN;tr|F8W0A3|F8W0A3_HUMAN	FALSE	40529108	22280516	40311636	21397126	39582648	22925974	0
sp|P61353|RL27_HUMAN	FALSE	39552388	25239716	40621012	27588750	42008948	22551808	0
tr|A0A1W2PPH7|A0A1W2PPH7_HUMAN;tr|A0A1W2PP34|A0A1W2PP34_HUMAN;tr|A0A1W2PQL0|A0A1W2PQL0_HUMAN;tr|A0A1W2PPL4|A0A1W2PPL4_HUMAN	FALSE	24302074	23209976	24986934	15993481	25209980	13575304	0.00121951
sp|P32969|RL9_HUMAN;tr|D6RAN4|D6RAN4_HUMAN	FALSE	23089990	12137129	21224704	17809838	14851195	9361340	0.00121951
sp|P16401|H15_HUMAN	FALSE	57288936	34480624	57642932	31363368	52436448	32742472	0
sp|P10412|H14_HUMAN;sp|P16402|H13_HUMAN	FALSE	168412816	109605880	162122512	89918000	158439312	98593200	0
sp|Q01650|LAT1_HUMAN	FALSE	9331657	4823702	8107881	4435193	7.6398e+06	4384227	0
tr|E9PNE6|E9PNE6_HUMAN	FALSE	130438792	94633288	146026784	114446008	146622432	101949464	0
tr|A0A0U1RRG3|A0A0U1RRG3_HUMAN	FALSE	18031824	10920566	17434616	9665391	17907020	9619910	0.00121951
tr|M0QY37|M0QY37_HUMAN;tr|M0QX14|M0QX14_HUMAN;tr|M0R0X0|M0R0X0_HUMAN	FALSE	93802008	54786588	99541344	65888208	86625880	61481204	0.00121951
tr|J3KTJ3|J3KTJ3_HUMAN;tr|J3QQT9|J3QQT9_HUMAN	FALSE	5.48164e+06	3.46571e+06	5.09944e+06	2.76523e+06	4.86776e+06	2.7316e+06	0
tr|B0YJC5|B0YJC5_HUMAN	FALSE	231221664	177915168	254157008	174578480	231382176	166166192	0
tr|F5GXY2|F5GXY2_HUMAN	FALSE	90990432	62766536	105601656	62762636	100615144	66431804	0
tr|F8VV71|F8VV71_HUMAN;tr|F8VQQ8|F8VQQ8_HUMAN;sp|P61088|UBE2N_HUMAN;tr|F8VSD4|F8VSD4_HUMAN	FALSE	3471287	1.90461e+06	3775640	2.22421e+06	3692391	1.84893e+06	0.00121951
tr|F8VY04|F8VY04_HUMAN;sp|P54819-6|KAD2_HUMAN	FALSE	25260538	11408995	22295510	15273817	21996736	18667248	0.00121951
sp|P07737|PROF1_HUMAN	FALSE	92604896	53248312	94625576	54651544	81838000	53988396	0
sp|Q15654|TRIP6_HUMAN	FALSE	862428	526594	886888	411876	1.00786e+06	560603	0.00121951
sp|P04259|K2C6B_HUMAN;sp|P02538|K2C6A_HUMAN;sp|P48668|K2C6C_HUMAN	FALSE	16465478	11722939	32141840	18951022	28508328	14314122	0.00121951
sp|Q15056-2|IF4H_HUMAN;sp|Q15056|IF4H_HUMAN	FALSE	11559235	6.27009e+06	11830777	6771671	11164434	7.06438e+06	0.00121951
sp|O60869-3|EDF1_HUMAN;sp|O60869-2|EDF1_HUMAN;sp|O60869|EDF1_HUMAN	FALSE	4609827	2940212	9067915	6290547	7.93377e+06	5.14476e+06	0.00345622
sp|P38646|GRP75_HUMAN	FALSE	153094384	98075032	146907920	90453504	143257184	89956704	0
tr|F8VXZ7|F8VXZ7_HUMAN	FALSE	16780650	10511794	17855944	10754556	20286162	12065200	0
tr|H7C422|H7C422_HUMAN	FALSE	16649930	9821834	16917040	9838659	16866312	9722037	0.00121951
sp|Q6S8J3|POTEE_HUMAN	FALSE	376858048	256010176	388495424	274502176	412644000	267972208	0
sp|P02545-6|LMNA_HUMAN;sp|P02545-2|LMNA_HUMAN	FALSE	14805412	8531994	14374235	9965070	12091849	7292191	0
tr|B8ZZK4|B8ZZK4_HUMAN	FALSE	19324124	10964012	18404172	13070283	18280636	10719897	0.00121951
tr|F8VUG2|F8VUG2_HUMAN	FALSE	28331378	14122839	26859838	14879547	24026510	13191579	0
sp|P62241|RS8_HUMAN	FALSE	78800888	57859512	85152952	65855816	86363464	63304560	0
sp|P49411|EFTU_HUMAN	FALSE	41456528	26147648	45481688	28325624	43931184	24541076	0
sp|P30101|PDIA3_HUMAN	FALSE	308043040	183044736	259763424	158126832	283753280	163055488	0
sp|P35637|FUS_HUMAN;tr|H3BPE7|H3BPE7_HUMAN;sp|P35637-2|FUS_HUMAN	FALSE	24736280	11052012	22205284	9923757	17258280	10196622	0
sp|Q02543|RL18A_HUMAN	FALSE	5338635	2.11014e+06	5464262	2.88173e+06	5411755	3.00296e+06	0.00121951
sp|Q15691|MARE1_HUMAN	FALSE	913683	563016	990106	684349	916521	639693	0
sp|Q02539|H11_HUMAN	FALSE	5.80161e+06	3.99475e+06	6.7502e+06	4.04091e+06	6.35959e+06	4.14825e+06	0
tr|A6NFX8|A6NFX8_HUMAN;sp|Q9UKK9|NUDT5_HUMAN	FALSE	14418808	7.72282e+06	15213347	8615808	16656339	9601252	0
sp|P17066|HSP76_HUMAN	FALSE	106174112	77079408	121137904	88619440	124270152	74640136	0
sp|P30041|PRDX6_HUMAN	FALSE	36702960	20126862	36608448	23056072	32204976	20978982	0
sp|Q9HB71-3|CYBP_HUMAN;sp|Q9HB71|CYBP_HUMAN	FALSE	107663600	67746512	109132232	56430824	104997080	51897260	0.00121951
sp|P00558|PGK1_HUMAN	FALSE	258928048	138187120	248681936	133398952	239800432	155987168	0
sp|P05787|K2C8_HUMAN;sp|P05787-2|K2C8_HUMAN	FALSE	816353152	522866112	870115456	511636928	852046336	482399904	0
sp|P24534|EF1B_HUMAN	FALSE	93618472	43566340	97645552	43338504	83899400	55541472	0
tr|A0A1B0GW42|A0A1B0GW42_HUMAN	FALSE	43349048	21781486	54059400	23324710	51143632	21029666	0.00121951
sp|P05141|ADT2_HUMAN	FALSE	95617392	59104036	97729648	58151020	91655816	54402688	0
tr|M0QZN2|M0QZN2_HUMAN	FALSE	4.0038e+06	2.89148e+06	4697028	2.72393e+06	5516194	2983948	0
tr|J3KS13|J3KS13_HUMAN	FALSE	5.62139e+06	4250906	8423018	6104285	8485801	4949160	0
sp|P05023-2|AT1A1_HUMAN	FALSE	5.89288e+06	3.32901e+06	7117974	4521954	6.05427e+06	4764982	0.00121951
tr|H0YAM7|H0YAM7_HUMAN	FALSE	20311638	12858642	24397018	20585758	20654632	15736148	0.00121951
sp|P35232|PHB_HUMAN	FALSE	35156456	23730158	36266000	26642988	34978888	22975512	0.00121951
sp|P00338-4|LDHA_HUMAN	FALSE	23902746	25446472	30042764	26317068	24651874	13199384	0
tr|K7ELC7|K7ELC7_HUMAN	FALSE	47767844	44502316	54833560	38289080	59842440	24906360	0.00121951
sp|P31689|DNJA1_HUMAN;sp|P31689-2|DNJA1_HUMAN	FALSE	11556503	7.13532e+06	12437992	6.17242e+06	11875546	5.46426e+06	0.00121951
sp|P12236|ADT3_HUMAN	FALSE	62417732	39148924	66478084	40519944	70262320	40076020	0
tr|E9PQB7|E9PQB7_HUMAN	FALSE	116360352	69264880	110092472	53946664	113387712	73131448	0
tr|K7ENJ4|K7ENJ4_HUMAN	FALSE	57101516	35918980	60649480	30635770	57013096	32390092	0
tr|D6R991|D6R991_HUMAN	FALSE	33077390	13987961	34478944	14774323	36541288	13611035	0.00240964
sp|P30048-2|PRDX3_HUMAN;sp|P30048|PRDX3_HUMAN	FALSE	15940605	9508580	19120980	11823999	17892456	9455380	0.00121951
tr|K7ENA0|K7ENA0_HUMAN	FALSE	21009350	12802486	18660412	4350834	17320304	11070839	0.00121951
sp|Q99832-3|TCPH_HUMAN	FALSE	16095193	8409961	15210147	10676681	14439302	8427354	0.00121951
tr|E5RJH3|E5RJH3_HUMAN	FALSE	10572626	7.13511e+06	12476136	7.85213e+06	12629182	7.27966e+06	0.00121951
tr|Q5HYB6|Q5HYB6_HUMAN	FALSE	3.09052e+06	2.1951e+06	3.45518e+06	2.21115e+06	3.77686e+06	2473752	0.00121951
sp|O60361|NDK8_HUMAN	FALSE	42055200	23409806	39354724	25597536	38417072	30526996	0
tr|A0A2R8Y6G6|A0A2R8Y6G6_HUMAN	FALSE	532093248	349651776	533230464	335738720	510470400	311429184	0
sp|P18621-2|RL17_HUMAN;tr|J3QLC8|J3QLC8_HUMAN;tr|A0A0A0MRF8|A0A0A0MRF8_HUMAN	FALSE	52853604	37815196	49349324	25478292	52312340	18804132	0
tr|F5GXH2|F5GXH2_HUMAN	FALSE	14030196	10020172	17081568	8.20002e+06	14550999	9261570	0
tr|J3KRZ1|J3KRZ1_HUMAN	FALSE	12408792	8.07268e+06	12589919	5597365	10388976	7277497	0.00121951
sp|P23246-2|SFPQ_HUMAN;sp|P23246|SFPQ_HUMAN	FALSE	53505032	37411860	56449524	34511372	51956708	32986292	0
sp|P47914|RL29_HUMAN;tr|A0A3B3ITT5|A0A3B3ITT5_HUMAN	FALSE	14742807	10114387	14371055	7822294	14235531	7.97751e+06	0
tr|I3L398|I3L398_HUMAN	FALSE	3172366	2.01203e+06	3455915	2.40429e+06	3.21178e+06	1971385	0.00121951
tr|Q5GGW2|Q5GGW2_HUMAN;tr|A0A0G2JQH2|A0A0G2JQH2_HUMAN	FALSE	12062927	7468715	12673182	6294138	12449565	7475834	0.00345622
tr|A0A2R8Y619|A0A2R8Y619_HUMAN	FALSE	652670272	413379904	604960256	373020768	592219008	351691136	0
tr|A0A0B4J1R6|A0A0B4J1R6_HUMAN	FALSE	382878144	245313968	424453056	188872832	325146784	236637056	0
sp|P27635|RL10_HUMAN	FALSE	33406206	18763150	32358286	19312212	30447232	19107216	0
XXX_tr|C9JHW6|C9JHW6_HUMAN;XXX_tr|C9J4X8|C9J4X8_HUMAN;XXX_sp|Q86VW0|SESD1_HUMAN	TRUE	2431778	632629	417824	2.75329e+06	490951	159573	0.00681818
sp|Q13247|SRSF6_HUMAN;sp|Q13247-3|SRSF6_HUMAN	FALSE	15700938	9373311	16488972	10984934	16167030	10369935	0.00121951
sp|Q96AG4|LRC59_HUMAN	FALSE	35726816	18790784	36414920	20586772	33009158	22558322	0
tr|B8ZZ54|B8ZZ54_HUMAN	FALSE	38349992	24716124	37695196	18315140	34234968	25043174	0
tr|E9PL71|E9PL71_HUMAN	FALSE	12155470	7.97552e+06	13057130	8488176	13116223	7172586	0.00121951
tr|H7BY16|H7BY16_HUMAN	FALSE	87089120	54265820	84278616	58449400	110719032	62000976	0
tr|M0R2T4|M0R2T4_HUMAN	FALSE	45673144	28528820	43820372	27356642	42444940	24809278	0
sp|P68371|TBB4B_HUMAN	FALSE	152671200	108761680	166712256	105558800	154976496	98424968	0
sp|P62424|RL7A_HUMAN	FALSE	10189636	5.35411e+06	8827890	5425582	8901120	5.52876e+06	0
sp|P26639|SYTC_HUMAN	FALSE	37111816	29264116	40758464	24966124	40902028	23308906	0
sp|P27348|1433T_HUMAN	FALSE	55078616	35187480	54440620	36209440	51579692	31389590	0
tr|F5GYU2|F5GYU2_HUMAN	FALSE	47467896	32706408	48262164	30717634	48267976	27687744	0.00121951
sp|P28066-2|PSA5_HUMAN	FALSE	19740318	30141868	20784106	33438646	19912530	9368444	0
sp|P22626|ROA2_HUMAN	FALSE	108034624	62080144	127066256	80231064	116396648	70163520	0.00121951
tr|G3V2J8|G3V2J8_HUMAN	FALSE	150629584	101654208	154228432	89772064	150370208	93039160	0
sp|Q9H0C2|ADT4_HUMAN	FALSE	51884708	28415590	49449452	33298580	47349352	29884258	0.00121951
tr|D6RBK0|D6RBK0_HUMAN	FALSE	24941514	17698052	28481882	16881142	29125826	16539470	0.00121951
XXX_sp|Q9H204|MED28_HUMAN;XXX_tr|H0YAA8|H0YAA8_HUMAN	TRUE	0	0	0	621080	0	0	0.00457666
sp|P62861|RS30_HUMAN;tr|E9PR30|E9PR30_HUMAN	FALSE	29980664	18852264	33063458	15431046	30428388	15952274	0
tr|G3XAL0|G3XAL0_HUMAN	FALSE	37661032	28032596	52528528	13029706	6.13043e+06	5157846	0.00121951
tr|A0A1W2PPE9|A0A1W2PPE9_HUMAN	FALSE	37723012	29778888	41752428	25653694	38181968	24893050	0
tr|E5RI98|E5RI98_HUMAN	FALSE	157120304	106439208	175133792	103263488	164953280	99305000	0.00121951
tr|H0Y9R4|H0Y9R4_HUMAN	FALSE	21906476	14155564	22684646	10081154	19732486	14513327	0
tr|F8VRH0|F8VRH0_HUMAN	FALSE	34891224	19829474	39489752	15936148	40390760	16171670	0.00121951
tr|G3V2N6|G3V2N6_HUMAN;tr|G3V5W4|G3V5W4_HUMAN;tr|G3V2R8|G3V2R8_HUMAN;tr|G3V3R4|G3V3R4_HUMAN	FALSE	46603780	31649424	48680876	36021436	48507156	27398204	0
sp|A5A3E0|POTEF_HUMAN	FALSE	12899598	8.10917e+06	13212358	10419398	12802246	7837852	0.00121951
tr|C9JNW5|C9JNW5_HUMAN;tr|C9JXB8|C9JXB8_HUMAN	FALSE	30033552	16431496	28860022	20402064	29262296	18006812	0
sp|P35241-4|RADI_HUMAN	FALSE	26913340	17057380	27562906	17219140	24555108	14599808	0.00121951
sp|P06576|ATPB_HUMAN	FALSE	238263056	142164320	242834048	144609696	229646512	138842976	0
tr|H7C3W8|H7C3W8_HUMAN	FALSE	12896772	7.91075e+06	14219228	7105689	13603361	6.00372e+06	0.00121951
sp|O95399|UTS2_HUMAN;tr|Q5H8X8|Q5H8X8_HUMAN;sp|O95399-2|UTS2_HUMAN	FALSE	5359088	3.54643e+06	5.71681e+06	6.01657e+06	5794505	3723755	0.00240964
tr|F8W888|F8W888_HUMAN	FALSE	29867212	19460292	31298418	17915130	31925670	20125024	0.00121951
tr|I3L3T1|I3L3T1_HUMAN;tr|B4DJF2|B4DJF2_HUMAN	FALSE	29986020	18120108	27880900	13215674	26323040	15957382	0
sp|P52597|HNRPF_HUMAN	FALSE	63704612	46411544	66438724	40438164	62725608	34099036	0.00121951
sp|P07205|PGK2_HUMAN	FALSE	86579376	52528064	94254712	51054664	88161152	52968844	0.00121951
tr|A0A2R8Y5Y7|A0A2R8Y5Y7_HUMAN	FALSE	6.11032e+06	11964355	13179039	10338164	11580797	9946041	0
sp|Q96FJ2|DYL2_HUMAN;sp|P63167|DYL1_HUMAN	FALSE	9150545	5655408	8456256	5597846	6764211	5.43845e+06	0.00345622
sp|P18124|RL7_HUMAN	FALSE	19653540	13271243	18684580	8722106	17808538	12329671	0
sp|P62805|H4_HUMAN	FALSE	1544070272	982922176	1555611264	1027221120	1522423168	920496768	0
tr|M0QY96|M0QY96_HUMAN;tr|M0R2I7|M0R2I7_HUMAN	FALSE	34648684	20025022	37924744	26442082	36014392	27575218	0.00121951
tr|H0Y400|H0Y400_HUMAN	FALSE	12290689	8942542	15368262	7033505	14848219	6566446	0
tr|F8WAM2|F8WAM2_HUMAN	FALSE	65715680	61094228	14043911	7649399	10499651	6.21499e+06	0.00121951
sp|Q9NRR5|UBQL4_HUMAN;sp|Q9UMX0|UBQL1_HUMAN;sp|Q9UMX0-2|UBQL1_HUMAN;sp|Q9UMX0-3|UBQL1_HUMAN;tr|H0YDS0|H0YDS0_HUMAN	FALSE	6651558	5603661	7.99976e+06	4811721	7.41149e+06	4.63016e+06	0.00121951
sp|P35579|MYH9_HUMAN	FALSE	20526144	13364504	18952922	11978963	19221682	19591430	0
tr|C9K0S6|C9K0S6_HUMAN;tr|C9JDL2|C9JDL2_HUMAN	FALSE	89791624	65288016	101635232	65917104	99598504	67715760	0.00121951
tr|K7EJB9|K7EJB9_HUMAN	FALSE	77273144	51829684	74382368	42468432	69098360	41199500	0
sp|P31949|S10AB_HUMAN	FALSE	5.20525e+06	2.60345e+06	4083419	2.84975e+06	4.40536e+06	2.36228e+06	0
tr|H3BU31|H3BU31_HUMAN	FALSE	8.37844e+06	5683215	12103908	7.1924e+06	11648119	5.15021e+06	0.00121951
tr|M0QZM1|M0QZM1_HUMAN	FALSE	11774344	7730668	13496752	8058712	12070700	8426069	0
sp|Q16695|H31T_HUMAN	FALSE	555603072	343550016	546776960	382069792	536329856	320719936	0.00121951
tr|A0A2R8YFE2|A0A2R8YFE2_HUMAN	FALSE	35273108	62033896	100258448	58779112	97989296	60112760	0
tr|E5RGH4|E5RGH4_HUMAN	FALSE	33042784	23310168	35839448	21830896	33145300	18573018	0
tr|F8VQ14|F8VQ14_HUMAN	FALSE	93529096	37139212	48624336	24480450	47345944	29891000	0
tr|D6RD47|D6RD47_HUMAN	FALSE	8.37599e+06	5288748	8300484	4.52777e+06	8.16756e+06	4.82946e+06	0.00121951
sp|P14625|ENPL_HUMAN	FALSE	95983632	62261112	98006232	62886316	98594072	55280536	0
tr|C9JI87|C9JI87_HUMAN	FALSE	34667096	21134878	32916094	12943750	30673304	18846446	0.00121951
tr|C9JJ34|C9JJ34_HUMAN	FALSE	15306995	12081774	18657274	16791066	16588922	13696223	0.00345622
sp|P08729|K2C7_HUMAN	FALSE	43521536	26021804	39517352	26662072	37077028	22105332	0
tr|A0A2R8YEM5|A0A2R8YEM5_HUMAN	FALSE	234153424	177431456	242918080	179694688	241405424	168505568	0
tr|A0A0U1RQF0|A0A0U1RQF0_HUMAN	FALSE	86705000	40336300	57683952	36292360	58760916	28318820	0
sp|P30050|RL12_HUMAN	FALSE	56006076	33563680	53222312	30116712	50164380	27529788	0
sp|P09429|HMGB1_HUMAN	FALSE	21904128	12518010	21333180	9969964	18369416	11672017	0
sp|P14174|MIF_HUMAN	FALSE	92002528	55657948	92217472	60189220	86729776	52708348	0.00121951
sp|O43143|DHX15_HUMAN	FALSE	5.41913e+06	2.36412e+06	2.5823e+06	2.81925e+06	3.44464e+06	2.96246e+06	0.00121951
tr|J3KSZ0|J3KSZ0_HUMAN	FALSE	33175416	19710646	30084914	19470532	32139422	17209034	0.00121951
sp|P0DPH7|TBA3C_HUMAN;sp|P0DPH8|TBA3D_HUMAN	FALSE	83818416	57978448	89858864	55908600	87014488	54618140	0
tr|Q3BDU5|Q3BDU5_HUMAN	FALSE	25246292	18113326	28254150	21554798	28366702	17598266	0
sp|P84098|RL19_HUMAN;tr|J3KTE4|J3KTE4_HUMAN;tr|J3QR09|J3QR09_HUMAN	FALSE	10664993	7.62017e+06	13631348	8663109	15367486	8962065	0.00121951
tr|F8VYV2|F8VYV2_HUMAN	FALSE	21328558	11861430	24473302	11327199	20285344	13241035	0.00121951
sp|Q86V81|THOC4_HUMAN;tr|E9PB61|E9PB61_HUMAN	FALSE	33034812	29615674	34694768	21588366	34848368	21555580	0
sp|P00558-2|PGK1_HUMAN	FALSE	57364036	54012668	79855592	55021356	59570892	38967392	0.00121951
sp|P98179|RBM3_HUMAN	FALSE	12236004	7610938	13527826	11181342	13027500	9534844	0.00121951
sp|Q15365|PCBP1_HUMAN	FALSE	57403696	39019268	59832500	36889820	64559404	40363832	0
sp|P78371|TCPB_HUMAN	FALSE	79611864	52256840	86052464	60703404	88286048	59131004	0.00121951
tr|F5H018|F5H018_HUMAN	FALSE	33324646	20447586	33369688	18174736	28929714	20562112	0
tr|Q5T7C4|Q5T7C4_HUMAN	FALSE	39197528	25101162	44131048	23978500	44174536	24226564	0.00121951
tr|A0A075B6E2|A0A075B6E2_HUMAN	FALSE	24596162	16092996	28174414	15080924	24734812	14871718	0
sp|P46777|RL5_HUMAN	FALSE	22709266	16958826	24139520	11406788	20842246	12592940	0
sp|P55060-4|XPO2_HUMAN;sp|P55060-3|XPO2_HUMAN;sp|P55060|XPO2_HUMAN	FALSE	4410909	1.89682e+06	3.02676e+06	2.22963e+06	3.01687e+06	2.10128e+06	0
tr|J3KT73|J3KT73_HUMAN;tr|J3QL01|J3QL01_HUMAN	FALSE	15745208	10327481	19820388	7.3574e+06	17137700	10544069	0
tr|E7EQR6|E7EQR6_HUMAN;tr|F5H282|F5H282_HUMAN	FALSE	8.12506e+06	5270177	7602945	4.52029e+06	8.33823e+06	4.07396e+06	0.00121951
tr|Q5R211|Q5R211_HUMAN	FALSE	9624356	4.04337e+06	7.87959e+06	5.83185e+06	6.26532e+06	4207713	0.00121951
tr|H3BR70|H3BR70_HUMAN	FALSE	115649872	74813768	127527544	80224704	117889000	65491396	0
sp|Q9Y266|NUDC_HUMAN;tr|A0A0A0MSS4|A0A0A0MSS4_HUMAN;tr|A0A0A0MSU9|A0A0A0MSU9_HUMAN	FALSE	6.09875e+06	3.92178e+06	5.77706e+06	3.407e+06	5.19684e+06	3.54012e+06	0.00121951
sp|P00403|COX2_HUMAN	FALSE	19435176	13959974	16817832	11358817	19659660	13636269	0.00121951
tr|M0R0N3|M0R0N3_HUMAN	FALSE	6.86655e+06	4511499	6892966	3033611	6548726	3.96812e+06	0.00121951
sp|P06748-3|NPM_HUMAN	FALSE	503329664	319623872	518296800	221167200	427922432	263569168	0.00121951
tr|S4R359|S4R359_HUMAN	FALSE	39674820	23167544	39206312	25965688	41372216	24035272	0
tr|U3KPZ0|U3KPZ0_HUMAN	FALSE	105023984	62226428	96958088	56173084	99578592	50657756	0
tr|H3BTH3|H3BTH3_HUMAN	FALSE	9879008	6.94904e+06	10858836	6143440	8527660	4.56317e+06	0.00121951
tr|V9GZ37|V9GZ37_HUMAN	FALSE	156129328	88788712	186352160	111023320	184414352	93388000	0
tr|H0Y9V9|H0Y9V9_HUMAN	FALSE	20243322	41673520	31519350	49992596	31737880	34976036	0.00121951
tr|A0A1W2PP22|A0A1W2PP22_HUMAN	FALSE	50504248	23137916	49346176	30992218	38436824	31089136	0.00121951
tr|M0R117|M0R117_HUMAN	FALSE	12882031	5341861	12706102	3.10079e+06	9784964	3.4904e+06	0.00345622
sp|P13010|XRCC5_HUMAN	FALSE	8822091	5028784	9357924	4.9821e+06	10371461	4942412	0.00121951
sp|P49755|TMEDA_HUMAN	FALSE	4788639	2.39863e+06	4925902	2998405	5097334	2.99674e+06	0.00121951
tr|E5RGV0|E5RGV0_HUMAN	FALSE	15681615	12015391	16815386	11625090	16215408	9947641	0.00121951
sp|P62854|RS26_HUMAN;sp|Q5JNZ5|RS26L_HUMAN	FALSE	34839576	21345660	34244208	20111800	33247172	19042724	0
tr|H3BU13|H3BU13_HUMAN	FALSE	65552736	42155612	66588428	50662800	65128684	39181704	0.00121951
sp|P34932|HSP74_HUMAN	FALSE	14504664	10190459	20769472	10801890	20927644	10627624	0
tr|F8VYN5|F8VYN5_HUMAN	FALSE	39641096	23316088	38355316	24066140	46354084	45907980	0.00121951
sp|P53396-3|ACLY_HUMAN	FALSE	9839744	5856527	8611993	6.55731e+06	9155956	5577739	0.00121951
tr|M0R0P7|M0R0P7_HUMAN	FALSE	8658738	6313329	9214212	6485962	8967784	5659535	0.00121951
tr|A0A2R8Y6J3|A0A2R8Y6J3_HUMAN	FALSE	29827618	22931128	32694880	16699722	37285716	21755908	0
tr|A0A1B0GTT5|A0A1B0GTT5_HUMAN	FALSE	78481288	46200024	77241968	41764304	72091608	45759588	0
sp|P23284|PPIB_HUMAN	FALSE	65054008	39777128	64324996	33875108	59821436	40423136	0
sp|Q6FI13|H2A2A_HUMAN;sp|Q16777|H2A2C_HUMAN	FALSE	92749896	36271536	118144944	45906892	90554256	44423436	0.00121951
tr|I3L3I0|I3L3I0_HUMAN;tr|I3L1U9|I3L1U9_HUMAN	FALSE	190681472	122137840	185187952	93852512	179433008	111593576	0
sp|Q13347|EIF3I_HUMAN	FALSE	10599656	7.71504e+06	13216433	7.43492e+06	12030185	8706312	0
tr|H0YFX9|H0YFX9_HUMAN	FALSE	208917152	143760976	212431552	130037968	215500528	143097984	0
sp|P35232-2|PHB_HUMAN	FALSE	10399809	5.50367e+06	8913860	5317018	9165536	5.09353e+06	0.00121951
sp|P11021|BIP_HUMAN	FALSE	407341152	261631072	412621376	253975904	397909600	245736880	0
sp|O00299|CLIC1_HUMAN	FALSE	8155506	4798627	8.14545e+06	3.14102e+06	7843331	5122153	0.00121951
sp|P62266|RS23_HUMAN	FALSE	26398174	17963228	28434184	17440280	29184040	17179492	0
sp|P62753|RS6_HUMAN	FALSE	26412428	15233465	27023188	16436010	24685676	15596662	0
tr|A0A1W2PP35|A0A1W2PP35_HUMAN	FALSE	60251392	36043304	58618920	34385944	55274936	32662440	0.00121951
sp|Q92901|RL3L_HUMAN	FALSE	9041023	6889673	11778770	7.58406e+06	10579259	8.28759e+06	0
sp|P68363-2|TBA1B_HUMAN	FALSE	24954686	15575553	23119562	11003277	16872846	10302327	0
sp|Q99832-4|TCPH_HUMAN	FALSE	21734930	12714008	22667078	13421940	20551930	12176863	0
tr|E7EX29|E7EX29_HUMAN	FALSE	39974476	25744212	39071092	22569016	36447164	20757538	0
sp|P62269|RS18_HUMAN	FALSE	13674448	8767804	13503951	8.14076e+06	13583130	7664333	0
sp|Q99832|TCPH_HUMAN	FALSE	81815856	46927396	78028392	35716948	66922004	38353824	0
sp|P08238|HS90B_HUMAN	FALSE	1518002176	920582912	1560013312	945854272	1363288832	833222976	0
sp|P63313|TYB10_HUMAN	FALSE	3.67074e+06	2.49162e+06	3646864	1.97071e+06	3716581	2843846	0.00121951
tr|M0QY85|M0QY85_HUMAN	FALSE	15506546	11281617	16580059	10474859	15394153	9989425	0.00121951
tr|A0A286YF78|A0A286YF78_HUMAN	FALSE	71186832	42299336	69733200	39240804	56384784	31471048	0
tr|E9PS23|E9PS23_HUMAN	FALSE	114874360	76282056	131112504	48374340	115683720	72809616	0
tr|M0QZC5|M0QZC5_HUMAN	FALSE	18264562	11419825	18987254	7658573	16177305	9045722	0
tr|H7C2U2|H7C2U2_HUMAN	FALSE	7743018	3449543	7567033	3121567	6434841	3.71231e+06	0.00121951
tr|F5H867|F5H867_HUMAN	FALSE	19153626	10672828	16959252	8.02872e+06	16069308	8669010	0
sp|Q9Y281-3|COF2_HUMAN;sp|Q9Y281|COF2_HUMAN	FALSE	85488912	50925572	78044904	45611468	74754376	49065328	0
sp|Q00325-2|MPCP_HUMAN;sp|Q00325|MPCP_HUMAN	FALSE	9242798	5.95908e+06	9777656	4.77805e+06	9698604	5584532	0
sp|P06899|H2B1J_HUMAN	FALSE	80922472	60234124	103242808	81408864	108235960	75478408	0.00121951
tr|F8VRK0|F8VRK0_HUMAN	FALSE	17415878	11148773	17532808	11105272	18071618	9573775	0.00121951
sp|Q02878|RL6_HUMAN	FALSE	93545032	59010608	89143136	53798176	86871160	58278148	0
sp|Q9Y3T9|NOC2L_HUMAN	FALSE	1.58987e+06	730897	1.2959e+06	753460	1.65432e+06	1.07291e+06	0.00121951
sp|P05204|HMGN2_HUMAN	FALSE	1.80706e+06	1290907	2.08614e+06	931751	2.08777e+06	1106307	0.00121951
tr|H7C4C8|H7C4C8_HUMAN	FALSE	47029412	39574124	51397884	41011896	56578960	35728052	0
tr|M0R1I1|M0R1I1_HUMAN	FALSE	136783616	96332824	129132560	91933552	126217432	67420896	0.00121951
tr|J3KTN0|J3KTN0_HUMAN	FALSE	16221917	13546205	17096958	11515879	14780863	10132458	0.00121951
tr|F5H0E2|F5H0E2_HUMAN	FALSE	40019940	25974454	40159264	22150036	40078764	23291666	0
sp|Q71DI3|H32_HUMAN	FALSE	14276500	11409537	15678979	10860342	15924053	10298886	0.00121951
tr|A0A2R8YEA7|A0A2R8YEA7_HUMAN	FALSE	110181096	72506384	120131144	93133280	104687000	82032632	0.00121951
tr|C9JYS8|C9JYS8_HUMAN	FALSE	3.91085e+06	3.09578e+06	4.2928e+06	3.86215e+06	4387324	5284228	0
sp|P08574|CY1_HUMAN	FALSE	2.69349e+06	2091451	3289619	1.70037e+06	3.14593e+06	1.28151e+06	0.00121951
tr|A0A140T9X3|A0A140T9X3_HUMAN	FALSE	13113794	8553993	14061577	11155158	13645424	8934382	0.00121951
sp|P09382|LEG1_HUMAN	FALSE	32284750	26873692	39415376	22900630	34377956	19788772	0
tr|H0YF32|H0YF32_HUMAN	FALSE	40896792	26981428	42839888	25114136	42992144	24446666	0
tr|M0R2D3|M0R2D3_HUMAN	FALSE	268796672	209997440	346367648	251770752	315984640	262447616	0.00121951
sp|Q13185|CBX3_HUMAN	FALSE	15467830	7960857	13307270	7.07947e+06	12616042	6728900	0
sp|Q07666-3|KHDR1_HUMAN	FALSE	7490225	4.89955e+06	7850538	2.80531e+06	6375338	3.96874e+06	0
tr|I3L246|I3L246_HUMAN	FALSE	5.544e+06	3216032	6.28365e+06	3.40589e+06	4.95937e+06	2787538	0
tr|H3BTP7|H3BTP7_HUMAN	FALSE	8549946	5348220	7784166	3.70701e+06	8882300	5.78444e+06	0.00121951
sp|Q9BVA1|TBB2B_HUMAN	FALSE	35205200	20947124	39363288	29668268	44211236	27402712	0.00121951
sp|P61604|CH10_HUMAN	FALSE	21066030	12741884	20573416	12575396	21253886	13221243	0
sp|Q9C005|DPY30_HUMAN	FALSE	17474236	11235461	15801849	14668838	18432252	15911336	0
sp|P29401|TKT_HUMAN	FALSE	209378544	139202224	203346688	126681352	183788528	116550912	0
sp|P49327|FAS_HUMAN	FALSE	103667808	88921752	112571944	72673872	111589688	80437232	0
tr|F8WD59|F8WD59_HUMAN	FALSE	78008240	51145972	74004416	51878488	69644704	44888812	0
sp|P13639|EF2_HUMAN	FALSE	965639872	596924608	983015168	605152832	929023808	620266560	0
sp|P83731|RL24_HUMAN	FALSE	56601772	32176228	51802040	33094074	49256024	28870146	0
tr|C9JL19|C9JL19_HUMAN	FALSE	42487720	24678850	38957792	25185548	40581348	24753202	0
sp|P62258-2|1433E_HUMAN	FALSE	33732024	20428274	37215932	24473914	35453248	23197470	0.00121951
tr|A0A2R8YDN5|A0A2R8YDN5_HUMAN	FALSE	645738304	344205120	763928576	221551248	570451264	266972528	0
sp|Q9H4B7|TBB1_HUMAN	FALSE	116496192	72949392	113428704	75492704	108042448	65590168	0.00121951
tr|A6NIW5|A6NIW5_HUMAN	FALSE	12755744	11943259	14749259	12240274	11899314	8.03863e+06	0.00121951
tr|A0A1W2PQM2|A0A1W2PQM2_HUMAN	FALSE	310478816	197302128	301950976	173522432	294487776	177378912	0
tr|K7EM20|K7EM20_HUMAN	FALSE	49712284	29983438	54730444	42466456	66229216	40219248	0
sp|Q96A08|H2B1A_HUMAN	FALSE	147813360	93163936	135768384	70421728	126049136	81388312	0
sp|P30050-2|RL12_HUMAN	FALSE	47102364	26461190	53251116	33637240	47989928	29673756	0.00121951
tr|B4DNK4|B4DNK4_HUMAN	FALSE	35978196	44044400	65435424	52040140	65123892	42116252	0.00121951
sp|P62857|RS28_HUMAN	FALSE	36910568	21919542	35627796	22038382	32958490	21519222	0.00121951
tr|J3KMX5|J3KMX5_HUMAN	FALSE	26769234	15613524	24784590	12495701	21866862	13732118	0
tr|E9PN89|E9PN89_HUMAN	FALSE	72709288	48226072	70180288	36734584	72279416	42783120	0
tr|I3NI03|I3NI03_HUMAN	FALSE	11209651	7405209	7.44272e+06	4340732	8955081	6092596	0
sp|Q96L21|RL10L_HUMAN	FALSE	4744359	3.7855e+06	5478926	5083862	6.14603e+06	4190530	0.00121951
tr|E9PS65|E9PS65_HUMAN	FALSE	37034488	25512176	39917612	28553446	37102036	17746782	0.00121951
sp|P27144|KAD4_HUMAN	FALSE	7307709	3317743	7586216	3.66703e+06	5417054	4978794	0.00121951
sp|P19338|NUCL_HUMAN	FALSE	281445376	179404064	278830592	166708320	255381648	161393408	0
tr|A0A0U1RQJ0|A0A0U1RQJ0_HUMAN	FALSE	6150517	3.27153e+06	5.67944e+06	4246512	5.12727e+06	6076792	0
sp|Q9Y3U8|RL36_HUMAN	FALSE	12219084	6.33229e+06	13273702	6024480	14409272	8063448	0
sp|P46783|RS10_HUMAN	FALSE	51183584	29876448	43485984	24369542	47177644	27031304	0
sp|P21291|CSRP1_HUMAN;tr|E9PS42|E9PS42_HUMAN	FALSE	10913447	5901814	8827077	6566012	13540427	5.23632e+06	0
tr|Q5T8U3|Q5T8U3_HUMAN	FALSE	42060988	24833820	36246996	18648910	33694756	19112420	0
tr|A0A2R8Y793|A0A2R8Y793_HUMAN	FALSE	296016256	183227088	308764640	199772512	268693632	180345056	0
tr|H0YAQ2|H0YAQ2_HUMAN	TRUE	11709797	7849404	11343795	7.32742e+06	11083762	6651454	0.00121951
sp|P04843|RPN1_HUMAN	FALSE	2.61193e+06	1.39034e+06	2.7826e+06	1.55576e+06	3.16641e+06	1.39573e+06	0.00121951
tr|E9PLX7|E9PLX7_HUMAN	FALSE	14824457	16590546	12927148	13232915	16107019	13554877	0.00121951
sp|Q562R1|ACTBL_HUMAN	FALSE	156787024	104759120	153724304	111140328	152797920	91738120	0
sp|B2RPK0|HGB1A_HUMAN	FALSE	18648494	10673468	16007382	8144162	15637581	9966263	0
tr|F8W026|F8W026_HUMAN	FALSE	38206004	40135776	50041616	55689128	46397236	31027036	0
tr|A2A3R7|A2A3R7_HUMAN	FALSE	23923994	13158367	23427532	9045422	22603396	12952182	0.00121951
tr|A0A0C4DH44|A0A0C4DH44_HUMAN	FALSE	9450109	6.77787e+06	9505794	7.1632e+06	12053822	6396185	0.00121951
tr|A0A087WUI2|A0A087WUI2_HUMAN	FALSE	73275256	63006612	81557824	63227952	67980208	61439700	0.00121951
tr|F8W646|F8W646_HUMAN	FALSE	248364880	167810544	257664848	216587008	248944880	154532144	0
sp|P28072|PSB6_HUMAN	FALSE	7.35447e+06	4.45907e+06	7.55522e+06	4.13146e+06	6.18388e+06	3.28372e+06	0.00121951
sp|Q02790|FKBP4_HUMAN	FALSE	26100950	20677016	27828184	22918272	26440880	14006648	0
sp|Q13151|ROA0_HUMAN	FALSE	21067996	16066857	21832504	16432644	23968672	12940619	0.00121951
tr|H3BN98|H3BN98_HUMAN	FALSE	14025461	9059009	13901774	10708543	12086945	7.5812e+06	0.00121951
sp|P42704|LPPRC_HUMAN	FALSE	17140560	8646533	14902526	8752115	13377314	5746975	0
tr|K7EP01|K7EP01_HUMAN	FALSE	278781376	186087872	293569920	226346144	287357760	175138848	0
sp|P27797|CALR_HUMAN	FALSE	45014752	10086901	61541160	8553467	27752082	9813227	0.00121951
tr|F8VZS0|F8VZS0_HUMAN	FALSE	10672277	9148436	7835210	4551674	6.91438e+06	4420896	0
tr|F8VQQ4|F8VQQ4_HUMAN	FALSE	251061200	163520816	287522144	203057232	270832704	163766496	0
tr|Q5SX87|Q5SX87_HUMAN	FALSE	13029924	7580900	14185310	7.78372e+06	11452245	8.09821e+06	0.00121951
sp|Q8NFZ6|VN1R2_HUMAN	FALSE	11051.2	11482.2	336235	263516	321686	325581	0.00240964

## Sheet: DE_2vs1
ProteinGroup	Decoy	Quantity_1	Quantity_2	Quantity_3	Quantity_4	Quantity_5	Quantity_6	QValue
tr|D6R991|D6R991_HUMAN	FALSE	28374766	16897380	20678814	22924666	29996392	16112188	0
sp|P16070-16|CD44_HUMAN;sp|P16070-14|CD44_HUMAN;tr|H0YD17|H0YD17_HUMAN;sp|P16070-9|CD44_HUMAN;sp|P16070-18|CD44_HUMAN;sp|P16070-4|CD44_HUMAN;sp|P16070-8|CD44_HUMAN;sp|P16070-12|CD44_HUMAN;sp|P16070-10|CD44_HUMAN;sp|P16070-15|CD44_HUMAN;sp|P16070-3|CD44_HUMAN;sp|P16070-11|CD44_HUMAN;tr|H0Y2P0|H0Y2P0_HUMAN;tr|H0YD13|H0YD13_HUMAN;tr|H0Y5E4|H0Y5E4_HUMAN;tr|H0YDW7|H0YDW7_HUMAN;sp|P16070|CD44_HUMAN;sp|…	FALSE	48118440	16896766	56994272	20126462	48277648	5598467	0.00204918
tr|D6RA73|D6RA73_HUMAN;tr|D6RJI2|D6RJI2_HUMAN;tr|A0A3B3ITI4|A0A3B3ITI4_HUMAN	FALSE	174060288	88497352	182876512	92485552	165251328	81256624	0
sp|P62241|RS8_HUMAN	FALSE	628022336	311842240	710240576	338845824	678261184	298691296	0
sp|P14625|ENPL_HUMAN	FALSE	840904960	412743936	879382272	394782848	869866624	401496608	0
tr|A0A286YFE1|A0A286YFE1_HUMAN	FALSE	107485216	47992612	114635624	51441944	113279248	44975504	0
tr|H7C2L4|H7C2L4_HUMAN;sp|P62995-3|TRA2B_HUMAN;sp|P62995|TRA2B_HUMAN	FALSE	10110317	5.66385e+06	11194123	10961926	12446208	7.97803e+06	0
tr|F8W0K0|F8W0K0_HUMAN;tr|F8VRU1|F8VRU1_HUMAN;tr|E7EX17|E7EX17_HUMAN;tr|F8VSC7|F8VSC7_HUMAN;tr|F8VP89|F8VP89_HUMAN;tr|F8VYE9|F8VYE9_HUMAN;tr|F8VX11|F8VX11_HUMAN;sp|P23588|IF4B_HUMAN	FALSE	85985632	31728006	109205040	38640776	80613696	38515556	0.00204918
tr|M0R1A7|M0R1A7_HUMAN;tr|M0R3D6|M0R3D6_HUMAN	FALSE	43682432	27906958	48942008	18000442	42551452	12993017	0
tr|Q5T0R7|Q5T0R7_HUMAN;tr|Q5T0R2|Q5T0R2_HUMAN;tr|Q5T0R6|Q5T0R6_HUMAN;sp|Q01518|CAP1_HUMAN;tr|Q5T0R4|Q5T0R4_HUMAN;tr|Q5T0R1|Q5T0R1_HUMAN;tr|Q5T0R3|Q5T0R3_HUMAN;tr|Q5T0R5|Q5T0R5_HUMAN	FALSE	18502378	9543998	17994750	13425824	17116010	9400279	0.00204918
sp|O95340-2|PAPS2_HUMAN;sp|O95340|PAPS2_HUMAN	FALSE	5.81253e+06	2.88324e+06	7174266	3.18287e+06	5.9212e+06	2668045	0
tr|H0YMW4|H0YMW4_HUMAN;tr|H0YKL9|H0YKL9_HUMAN;tr|H0YKV8|H0YKV8_HUMAN	FALSE	117623960	60523456	118769456	63355992	112390672	53359448	0
sp|P18206|VINC_HUMAN;sp|P18206-2|VINC_HUMAN	FALSE	17505830	13022978	18002142	9574087	21773484	12086571	0.00204918
sp|P30499|1C01_HUMAN;tr|A0A140T9W2|A0A140T9W2_HUMAN;tr|A0A1W2PNZ7|A0A1W2PNZ7_HUMAN;sp|P30491|1B53_HUMAN;sp|P04222|1C03_HUMAN;sp|P30508|1C12_HUMAN;tr|A0A1W2PR11|A0A1W2PR11_HUMAN;tr|A2BF26|A2BF26_HUMAN;tr|A0A1W2PS56|A0A1W2PS56_HUMAN;sp|Q29865|1C18_HUMAN;tr|A0A140T9B3|A0A140T9B3_HUMAN;sp|P30501|1C02_HUMAN;sp|P30510|1C14_HUMAN;sp|P18464|1B51_HUMAN;sp|P30685|1B35_HUMAN;sp|P30490|1B52_HUMAN;sp|Q29963|1…	FALSE	580363	277486	503460	196483	426194	126256	0.00204918
sp|Q9Y265-2|RUVB1_HUMAN;sp|Q9Y265|RUVB1_HUMAN;tr|E7ETR0|E7ETR0_HUMAN	FALSE	23531890	8450255	26600874	7556434	21773454	9016859	0.00204918
sp|Q9UKK9|NUDT5_HUMAN;tr|A6NFX8|A6NFX8_HUMAN	FALSE	56687920	28608236	66164284	16148949	62216156	26875792	0
sp|Q14103-3|HNRPD_HUMAN;sp|Q14103-4|HNRPD_HUMAN;tr|H0Y8G5|H0Y8G5_HUMAN;sp|Q14103-2|HNRPD_HUMAN;tr|H0YA96|H0YA96_HUMAN;sp|Q14103|HNRPD_HUMAN	FALSE	66323812	30724116	74511512	23353620	71674904	33965476	0
tr|C9J1C5|C9J1C5_HUMAN	FALSE	46169120	18683896	49150256	22309260	47897580	22804064	0.00302419
tr|E9PPQ5|E9PPQ5_HUMAN;sp|Q9UHD1-2|CHRD1_HUMAN;tr|E9PIZ4|E9PIZ4_HUMAN;tr|E9PSD5|E9PSD5_HUMAN;sp|Q9UHD1|CHRD1_HUMAN	FALSE	13591080	7.30518e+06	15365584	4.02022e+06	13843414	4.95639e+06	0.00204918
tr|A0A0B4J1R6|A0A0B4J1R6_HUMAN	FALSE	823838784	336474272	776432704	241845920	772532800	303246944	0
sp|P62244|RS15A_HUMAN;tr|I3L3P7|I3L3P7_HUMAN	FALSE	98581248	45865228	111812344	44655208	108923856	49437648	0
tr|M0QYI6|M0QYI6_HUMAN;sp|P61081|UBC12_HUMAN	FALSE	12025316	6762282	10916445	2.97245e+06	10314064	4556850	0.00204918
tr|Q5TCI8|Q5TCI8_HUMAN;sp|P02545-5|LMNA_HUMAN;sp|P02545-4|LMNA_HUMAN	FALSE	180219040	95405576	215531776	109496096	204621968	91404808	0
tr|H0YBD7|H0YBD7_HUMAN;tr|H0YBG7|H0YBG7_HUMAN	FALSE	10154154	7.36007e+06	10199713	11231832	15566547	8.38334e+06	0
tr|J3QL01|J3QL01_HUMAN;tr|J3KT73|J3KT73_HUMAN	FALSE	90891856	62477104	129752192	38393416	109044688	47439216	0
sp|P59190-2|RAB15_HUMAN;tr|A0A2R8YFB8|A0A2R8YFB8_HUMAN;sp|P62820-3|RAB1A_HUMAN;tr|H0YLJ8|H0YLJ8_HUMAN;sp|P61026|RAB10_HUMAN;sp|P59190|RAB15_HUMAN;sp|Q9H0U4|RAB1B_HUMAN;sp|P62820-2|RAB1A_HUMAN;sp|P61006|RAB8A_HUMAN;tr|G3V196|G3V196_HUMAN;sp|P51153|RAB13_HUMAN;sp|P62820|RAB1A_HUMAN;tr|H0YL94|H0YL94_HUMAN;tr|E9PLD0|E9PLD0_HUMAN;tr|H0YNE9|H0YNE9_HUMAN;sp|Q92928|RAB1C_HUMAN;tr|A0A2R8YDI9|A0A2R8YDI9_HU…	FALSE	82642928	37348488	89470608	34307624	86172528	36365464	0
sp|Q15056|IF4H_HUMAN;sp|Q15056-2|IF4H_HUMAN	FALSE	40631444	22604642	48504328	31152882	58327160	35658180	0
tr|B4DY08|B4DY08_HUMAN;tr|B2R5W2|B2R5W2_HUMAN;sp|P07910|HNRPC_HUMAN;tr|G3V4W0|G3V4W0_HUMAN;tr|G3V4C1|G3V4C1_HUMAN;sp|P07910-2|HNRPC_HUMAN;tr|G3V2Q1|G3V2Q1_HUMAN;tr|G3V576|G3V576_HUMAN	FALSE	234820512	118173624	264196064	110454008	233370592	116525296	0
sp|Q5JNZ5|RS26L_HUMAN;sp|P62854|RS26_HUMAN	FALSE	374559520	194927968	396516544	163168704	406930176	168572032	0
tr|F8VXI6|F8VXI6_HUMAN;sp|P55209-2|NP1L1_HUMAN;tr|F5H4R6|F5H4R6_HUMAN;tr|F8VY35|F8VY35_HUMAN;tr|B7Z9C2|B7Z9C2_HUMAN;tr|F8W118|F8W118_HUMAN;tr|F8VRJ2|F8VRJ2_HUMAN;sp|P55209|NP1L1_HUMAN;tr|F8W020|F8W020_HUMAN;tr|F8VV59|F8VV59_HUMAN;sp|P55209-3|NP1L1_HUMAN;tr|F8VUX1|F8VUX1_HUMAN;tr|H0YHC3|H0YHC3_HUMAN;tr|F8W0J6|F8W0J6_HUMAN;tr|H0YIV4|H0YIV4_HUMAN	FALSE	44521760	21869484	50403452	22690748	45292596	20756428	0
tr|D6RG13|D6RG13_HUMAN;tr|D6RAT0|D6RAT0_HUMAN	FALSE	102469112	44295196	109726336	51114652	111923072	51519156	0
tr|F5GY37|F5GY37_HUMAN;tr|F5H3X6|F5H3X6_HUMAN	FALSE	43727812	32350140	53207216	28067950	64339812	26507616	0.00204918
sp|P00558|PGK1_HUMAN	FALSE	486335616	227165168	517256416	183628368	489313280	210482672	0
tr|J3KPX7|J3KPX7_HUMAN;sp|Q99623|PHB2_HUMAN;sp|Q99623-2|PHB2_HUMAN	FALSE	68110816	39123676	81227848	37285236	72537024	38515708	0
tr|R4GNH3|R4GNH3_HUMAN;tr|E9PM69|E9PM69_HUMAN;sp|P17980|PRS6A_HUMAN;tr|E9PKD5|E9PKD5_HUMAN	FALSE	23047134	12722335	26807778	16520530	20574670	14412357	0.00204918
sp|Q7L2H7|EIF3M_HUMAN;tr|E9PN86|E9PN86_HUMAN;tr|E7ESM3|E7ESM3_HUMAN;tr|J3KNJ2|J3KNJ2_HUMAN	FALSE	5646289	2.85151e+06	5889281	3031922	6.3946e+06	2.80542e+06	0.00204918
sp|P19388|RPAB1_HUMAN;tr|A0A087WVZ9|A0A087WVZ9_HUMAN;tr|A0A087WWX0|A0A087WWX0_HUMAN	FALSE	4170014	1.78606e+06	4.12847e+06	1.63993e+06	4401274	2.28818e+06	0.00204918
tr|E7EWJ3|E7EWJ3_HUMAN;tr|Q5R211|Q5R211_HUMAN;tr|C9JTA4|C9JTA4_HUMAN	FALSE	23546316	11400871	26830904	9087749	157912800	8930463	0.00204918
sp|Q9UKA9-4|PTBP2_HUMAN;sp|Q9UKA9-6|PTBP2_HUMAN;sp|Q9UKA9-5|PTBP2_HUMAN;sp|Q9UKA9-2|PTBP2_HUMAN;sp|Q9UKA9|PTBP2_HUMAN;sp|Q9UKA9-3|PTBP2_HUMAN	FALSE	40437356	17034896	35982012	15163491	37513384	13210536	0
tr|F8WE04|F8WE04_HUMAN	FALSE	335911424	199833376	352326752	152712064	338335968	142510192	0
sp|P68363-2|TBA1B_HUMAN	FALSE	58232836	29469934	61390632	23940682	57951040	25371512	0
sp|P29401|TKT_HUMAN	FALSE	335481344	193030336	424117824	160302368	386550112	183828928	0
tr|A0A2R8Y7H1|A0A2R8Y7H1_HUMAN;tr|A0A2R8YFH6|A0A2R8YFH6_HUMAN;tr|F6U211|F6U211_HUMAN;tr|A0A1W2PQS6|A0A1W2PQS6_HUMAN;tr|S4R435|S4R435_HUMAN	FALSE	55137692	21071704	57342404	24471272	55023412	25825750	0
tr|Q5JRR6|Q5JRR6_HUMAN	FALSE	26318378	9984922	29543282	13922589	33089268	12705995	0
sp|P60174-1|TPIS_HUMAN;sp|P60174|TPIS_HUMAN	FALSE	481174304	240560864	521889408	196812960	543012672	250952384	0
tr|A0A0D9SF20|A0A0D9SF20_HUMAN	FALSE	38008728	19440774	50325340	21137078	57442696	29569710	0.00204918
sp|Q7Z7H8-2|RM10_HUMAN;sp|Q7Z7H8|RM10_HUMAN	FALSE	16807760	2.63715e+06	6854731	1950176	12116546	4001038	0.00204918
tr|J3KTM9|J3KTM9_HUMAN;sp|Q14974-2|IMB1_HUMAN	FALSE	55387904	28186416	49446544	31212984	50137732	21250208	0
sp|Q01130|SRSF2_HUMAN;sp|Q01130-2|SRSF2_HUMAN;tr|J3KP15|J3KP15_HUMAN;sp|Q9BRL6-2|SRSF8_HUMAN;tr|J3QL05|J3QL05_HUMAN;sp|Q9BRL6|SRSF8_HUMAN	FALSE	115896696	49213112	118444544	53016564	107220832	48149880	0.00204918
tr|B7Z6Z4|B7Z6Z4_HUMAN;sp|P60660|MYL6_HUMAN;tr|G3V1V0|G3V1V0_HUMAN;tr|G8JLA2|G8JLA2_HUMAN;tr|F8VPF3|F8VPF3_HUMAN;sp|P14649|MYL6B_HUMAN;tr|F8W1R7|F8W1R7_HUMAN;tr|J3KND3|J3KND3_HUMAN;sp|P60660-2|MYL6_HUMAN;tr|F8W1I5|F8W1I5_HUMAN	FALSE	88471448	43708200	101314384	37533772	91483112	43505596	0
tr|H0YLC2|H0YLC2_HUMAN;tr|H0YLS6|H0YLS6_HUMAN	FALSE	57448636	20098524	68069008	28438932	61669796	21017598	0.00204918
sp|Q71DI3|H32_HUMAN;tr|K7EK07|K7EK07_HUMAN;sp|P68431|H31_HUMAN;sp|P84243|H33_HUMAN	FALSE	2568393984	1268573312	2560802048	995928576	2492375808	1155108480	0
tr|K7ERK8|K7ERK8_HUMAN;tr|A0A0J9YXM3|A0A0J9YXM3_HUMAN;tr|K7EIL4|K7EIL4_HUMAN;tr|A0A0J9YXH9|A0A0J9YXH9_HUMAN	FALSE	120997624	56965556	124126880	48794240	124346432	50784796	0
tr|H3BN98|H3BN98_HUMAN	FALSE	73536784	32853620	125244952	42754568	95751608	75822176	0
sp|O60716-20|CTND1_HUMAN;sp|O60716-6|CTND1_HUMAN;sp|O60716-16|CTND1_HUMAN;sp|O60716-23|CTND1_HUMAN;tr|E9PRE2|E9PRE2_HUMAN;tr|C9JZR2|C9JZR2_HUMAN;sp|O60716-14|CTND1_HUMAN;sp|O60716-3|CTND1_HUMAN;sp|O60716-18|CTND1_HUMAN;sp|O60716-21|CTND1_HUMAN;sp|O60716-12|CTND1_HUMAN;sp|O60716-17|CTND1_HUMAN;sp|O60716|CTND1_HUMAN;sp|O60716-10|CTND1_HUMAN;sp|O60716-15|CTND1_HUMAN;sp|O60716-19|CTND1_HUMAN;sp|O6071…	FALSE	6857443	18715900	8753441	21579486	10970523	20490528	0.00204918
sp|P52597|HNRPF_HUMAN	FALSE	113791376	50659552	126691280	70237784	100276112	59241240	0
sp|P25705-3|ATPA_HUMAN	FALSE	238277968	116621928	258847568	131687968	251436432	118416216	0
sp|P12236|ADT3_HUMAN;sp|P12235|ADT1_HUMAN;tr|V9GYG0|V9GYG0_HUMAN	FALSE	348720192	176776896	397415968	157563728	370938752	170892208	0
tr|H0YAP2|H0YAP2_HUMAN	FALSE	125579400	53407296	126305000	40869772	122388824	57775892	0
sp|Q9NY65|TBA8_HUMAN;tr|C9J2C0|C9J2C0_HUMAN;sp|Q9NY65-2|TBA8_HUMAN	FALSE	18255678	9161521	25569316	10525668	27476270	7548799	0
sp|P40926|MDHM_HUMAN	FALSE	214703152	89526976	208815280	89415896	198229168	95030896	0
sp|Q15365|PCBP1_HUMAN	FALSE	357831040	164981120	380145696	126327112	345899552	143034624	0
tr|J3QQT9|J3QQT9_HUMAN	FALSE	46711224	23269014	49194944	17426904	48392496	23295422	0
tr|A0A286YF78|A0A286YF78_HUMAN	FALSE	210738288	108171496	240654464	90364096	232047056	99677312	0
tr|I3L3B0|I3L3B0_HUMAN;tr|I3L3Q7|I3L3Q7_HUMAN;sp|Q07021|C1QBP_HUMAN	FALSE	52245828	49093016	50754688	45510628	43008672	32411450	0
tr|K7EP67|K7EP67_HUMAN;tr|K7EJ74|K7EJ74_HUMAN	FALSE	100460936	49830384	112889064	59363256	118995376	46833324	0.00204918
sp|P38405-2|GNAL_HUMAN;tr|A0A1W2PS82|A0A1W2PS82_HUMAN;tr|A0A1W2PRJ7|A0A1W2PRJ7_HUMAN;sp|P63092-2|GNAS2_HUMAN;sp|P63092-3|GNAS2_HUMAN;sp|P63096|GNAI1_HUMAN;sp|A8MTJ3|GNAT3_HUMAN;sp|P08754|GNAI3_HUMAN;sp|P63092-4|GNAS2_HUMAN;sp|P11488|GNAT1_HUMAN;tr|A0A3B3IUA8|A0A3B3IUA8_HUMAN;tr|Q5JWD1|Q5JWD1_HUMAN;sp|P09471|GNAO_HUMAN;sp|P38405|GNAL_HUMAN;sp|P19087|GNAT2_HUMAN;tr|A0A087WTB6|A0A087WTB6_HUMAN;tr|H0…	FALSE	281661920	130179952	256599408	104240192	246969536	120651832	0
sp|Q14697-2|GANAB_HUMAN;sp|Q14697|GANAB_HUMAN;tr|E9PKU7|E9PKU7_HUMAN;tr|F5H6X6|F5H6X6_HUMAN	FALSE	35560304	21103936	43890304	14907998	40203508	18391792	0
sp|Q14974|IMB1_HUMAN	FALSE	47045000	22844154	52622164	20562864	49482924	19964990	0.00204918
tr|A0A0U1RRM4|A0A0U1RRM4_HUMAN;tr|A6NLN1|A6NLN1_HUMAN;sp|P26599|PTBP1_HUMAN;sp|P26599-2|PTBP1_HUMAN;sp|P26599-3|PTBP1_HUMAN	FALSE	70737848	37800168	71349216	34437800	68916296	31219796	0
tr|K7EQ48|K7EQ48_HUMAN;tr|A0A0J9YYH3|A0A0J9YYH3_HUMAN;tr|A0A2R8Y6C7|A0A2R8Y6C7_HUMAN;tr|A0A0J9YX90|A0A0J9YX90_HUMAN;tr|K7EPY4|K7EPY4_HUMAN;tr|A0A0J9YXP8|A0A0J9YXP8_HUMAN	FALSE	173061712	82668648	195850928	73631392	181649408	77582296	0
sp|P07737|PROF1_HUMAN;tr|K7EJ44|K7EJ44_HUMAN	FALSE	535245984	259747376	602129024	250059264	553789952	283409152	0
sp|P46940|IQGA1_HUMAN	FALSE	48657900	24316062	54978668	25057092	58055280	24335288	0.00204918
sp|P06493-2|CDK1_HUMAN;tr|A0A024QZP7|A0A024QZP7_HUMAN;sp|P06493|CDK1_HUMAN	FALSE	12829140	0	10373237	7254718	8712169	0	0.00204918
sp|D6RJB6|U17LK_HUMAN;sp|A6NCW0|U17L3_HUMAN;tr|A0A087WUW7|A0A087WUW7_HUMAN;sp|D6RCP7|U17LJ_HUMAN;sp|C9J2P7|U17LF_HUMAN;tr|A0A087WTA0|A0A087WTA0_HUMAN;tr|A0A087WYD9|A0A087WYD9_HUMAN;sp|A8MUK1|U17L5_HUMAN;sp|D6R9N7|U17LI_HUMAN;sp|C9JVI0|U17LB_HUMAN;sp|D6RA61|U17LM_HUMAN;sp|C9JPN9|UL17C_HUMAN;tr|A0A087X1Q3|A0A087X1Q3_HUMAN;tr|A0A087WTC1|A0A087WTC1_HUMAN;tr|I3L0E4|I3L0E4_HUMAN;tr|A0A087WVW9|A0A087WVW…	FALSE	26038882	11288689	33879744	18569588	32071634	10696985	0.00204918
sp|O60506-3|HNRPQ_HUMAN;sp|O60506|HNRPQ_HUMAN;sp|O60506-2|HNRPQ_HUMAN;sp|O60506-4|HNRPQ_HUMAN	FALSE	14304377	4.50238e+06	14068871	3729659	16524460	11225468	0
tr|J3QLK0|J3QLK0_HUMAN;sp|P60763|RAC3_HUMAN;tr|J3KSC4|J3KSC4_HUMAN	FALSE	26026610	14390655	30912156	14262531	29106944	13531206	0.00204918
tr|H3BR68|H3BR68_HUMAN;tr|H3BQN4|H3BQN4_HUMAN;sp|P04075|ALDOA_HUMAN;sp|P04075-2|ALDOA_HUMAN;tr|H3BU78|H3BU78_HUMAN;tr|J3KPS3|J3KPS3_HUMAN	FALSE	26860620	11580769	28760182	13763518	22354368	12349152	0.00204918
sp|P40227-2|TCPZ_HUMAN	FALSE	74285664	29489164	73226856	38128916	63614804	33535008	0
sp|P25705-2|ATPA_HUMAN;sp|P25705|ATPA_HUMAN	FALSE	141205856	57642476	143629056	60778772	131718360	51164032	0
sp|P53396-2|ACLY_HUMAN;sp|P53396-3|ACLY_HUMAN;sp|P53396|ACLY_HUMAN	FALSE	76638224	34769804	73551640	31119464	74342368	31228446	0
tr|A0A140T9X5|A0A140T9X5_HUMAN;tr|A0A140T913|A0A140T913_HUMAN;tr|A0A140T8W8|A0A140T8W8_HUMAN;tr|A0A140T933|A0A140T933_HUMAN;sp|P30453|1A34_HUMAN;tr|A0A140T941|A0A140T941_HUMAN;tr|A0A0G2JPD3|A0A0G2JPD3_HUMAN;sp|P18462|1A25_HUMAN;tr|A0A1W2PPF8|A0A1W2PPF8_HUMAN;sp|P30450|1A26_HUMAN;sp|P30456|1A43_HUMAN;sp|P01891|1A68_HUMAN;tr|A0A1W2PR61|A0A1W2PR61_HUMAN;sp|P30512|1A29_HUMAN;sp|P30457|1A66_HUMAN;tr|A…	FALSE	1.27503e+06	574408	1200188	554235	1.22156e+06	525296	0.00302419
tr|A0A0B4J2C3|A0A0B4J2C3_HUMAN;tr|E9PJF7|E9PJF7_HUMAN;sp|P13693|TCTP_HUMAN;tr|J3KPG2|J3KPG2_HUMAN;sp|P13693-2|TCTP_HUMAN;tr|Q5W0H4|Q5W0H4_HUMAN	FALSE	57931064	28442374	62916240	21851410	58114292	22397082	0
tr|H3BRG4|H3BRG4_HUMAN;tr|H3BSJ9|H3BSJ9_HUMAN;sp|P22695|QCR2_HUMAN	FALSE	1.44795e+06	819238	1.38906e+06	593313	1.24279e+06	715802	0.00204918
sp|Q02539|H11_HUMAN	FALSE	34978512	20467178	42413660	15704132	42389424	19606714	0
tr|F8VS12|F8VS12_HUMAN;tr|H0YHG0|H0YHG0_HUMAN;tr|F8VZQ9|F8VZQ9_HUMAN;sp|P82979|SARNP_HUMAN	FALSE	25646520	8.3336e+06	23660386	7549692	26868068	7.62814e+06	0
sp|P62913-2|RL11_HUMAN;tr|Q5VVC8|Q5VVC8_HUMAN;sp|P62913|RL11_HUMAN	FALSE	600798144	328317952	649440064	307475072	618403968	274598784	0
tr|D6RD83|D6RD83_HUMAN	FALSE	85917208	37254628	69043432	35597952	68672552	26880456	0
tr|A0A182DWI3|A0A182DWI3_HUMAN;tr|A0A087WSY9|A0A087WSY9_HUMAN;tr|E9PKD3|E9PKD3_HUMAN;tr|F8W809|F8W809_HUMAN;sp|Q16881|TRXR1_HUMAN;sp|Q16881-2|TRXR1_HUMAN;tr|A0A087WSW9|A0A087WSW9_HUMAN;sp|Q16881-5|TRXR1_HUMAN;sp|Q16881-6|TRXR1_HUMAN;tr|E9PIR7|E9PIR7_HUMAN;sp|Q16881-4|TRXR1_HUMAN;sp|Q16881-3|TRXR1_HUMAN;sp|Q16881-7|TRXR1_HUMAN;tr|E2QRB9|E2QRB9_HUMAN	FALSE	20577722	11255562	25670682	9516187	25314760	5.57789e+06	0.00132275
sp|P62861|RS30_HUMAN;tr|E9PR30|E9PR30_HUMAN	FALSE	201239296	99813736	218604384	74171896	203489824	89288624	0
tr|H0YFS2|H0YFS2_HUMAN	FALSE	252623424	128679192	266142736	112361752	242070784	139404560	0
sp|Q6KB66|K2C80_HUMAN;tr|A0A1W2PS58|A0A1W2PS58_HUMAN;sp|P14136-3|GFAP_HUMAN;tr|A0A1W2PR46|A0A1W2PR46_HUMAN;sp|Q6KB66-3|K2C80_HUMAN;sp|Q6KB66-2|K2C80_HUMAN;tr|A0A1X7SCE1|A0A1X7SCE1_HUMAN;sp|P14136|GFAP_HUMAN;sp|P19013|K2C4_HUMAN;tr|K7EJU1|K7EJU1_HUMAN;tr|A0A1W2PQU7|A0A1W2PQU7_HUMAN;tr|K7EMP8|K7EMP8_HUMAN;sp|P14136-2|GFAP_HUMAN;tr|A0A1W2PRT3|A0A1W2PRT3_HUMAN;tr|A0A1X7SBR3|A0A1X7SBR3_HUMAN;tr|K7EPI4…	FALSE	110736168	52113752	125164448	47714396	115714696	56168332	0
sp|Q9H4B7|TBB1_HUMAN	FALSE	149541168	80776368	176056112	74904096	171909488	71265072	0
sp|P02545-2|LMNA_HUMAN;sp|P02545-3|LMNA_HUMAN;sp|P02545|LMNA_HUMAN;sp|P02545-6|LMNA_HUMAN	FALSE	167851328	93389088	191931456	70100408	176820944	70787760	0
sp|P68104|EF1A1_HUMAN;sp|Q5VTE0|EF1A3_HUMAN	FALSE	1463331200	754115904	1510554752	549619520	1487694592	708197504	0
sp|O60869|EDF1_HUMAN;sp|O60869-3|EDF1_HUMAN;sp|O60869-2|EDF1_HUMAN	FALSE	62416084	31522654	34048124	24244666	33113100	14420514	0
sp|P51991|ROA3_HUMAN;sp|P51991-2|ROA3_HUMAN	FALSE	46496228	25694708	45560356	20516860	40197408	21839676	0.00204918
sp|P47914|RL29_HUMAN;tr|A0A3B3ITT5|A0A3B3ITT5_HUMAN	FALSE	292033120	160882128	306425312	117936288	310604864	137580096	0
tr|H0YN88|H0YN88_HUMAN;tr|H3BNC9|H3BNC9_HUMAN;sp|P08708|RS17_HUMAN;tr|A0A075B716|A0A075B716_HUMAN	FALSE	62279152	30407906	79567112	26309132	68864040	36779484	0
sp|Q99880|H2B1L_HUMAN;sp|P62807|H2B1C_HUMAN;sp|Q5QNW6-2|H2B2F_HUMAN;tr|U3KQK0|U3KQK0_HUMAN;sp|P58876|H2B1D_HUMAN;sp|Q5QNW6|H2B2F_HUMAN;sp|Q99877|H2B1N_HUMAN;sp|Q93079|H2B1H_HUMAN;sp|Q99879|H2B1M_HUMAN	FALSE	754123264	353064960	754567104	278203904	679439232	321590848	0
tr|B7Z4E3|B7Z4E3_HUMAN;sp|P62899-3|RL31_HUMAN;sp|P62899|RL31_HUMAN;tr|B7Z4C8|B7Z4C8_HUMAN;tr|B8ZZK4|B8ZZK4_HUMAN;tr|C9JU56|C9JU56_HUMAN;sp|P62899-2|RL31_HUMAN;tr|H7C2W9|H7C2W9_HUMAN	FALSE	205444880	96892024	209224288	104050392	204654480	95868600	0
tr|I3L192|I3L192_HUMAN;tr|A0A087X2B5|A0A087X2B5_HUMAN;sp|P35613-4|BASI_HUMAN;sp|P35613|BASI_HUMAN;tr|A0A087WUV8|A0A087WUV8_HUMAN;sp|P35613-2|BASI_HUMAN;sp|P35613-3|BASI_HUMAN;tr|R4GMX5|R4GMX5_HUMAN	FALSE	90536664	41544072	100753192	50236168	91809672	42091716	0.00204918
tr|E7EXB4|E7EXB4_HUMAN	FALSE	208432752	115674544	237539568	134890544	251278672	118623280	0
sp|P49411|EFTU_HUMAN	FALSE	147985760	88334864	158954064	73354216	162306016	80814248	0
sp|Q15149-3|PLEC_HUMAN;sp|Q15149-2|PLEC_HUMAN;sp|Q15149-5|PLEC_HUMAN;sp|Q15149-7|PLEC_HUMAN;sp|Q15149|PLEC_HUMAN;sp|Q15149-9|PLEC_HUMAN;sp|Q15149-6|PLEC_HUMAN;sp|Q15149-4|PLEC_HUMAN;sp|Q15149-8|PLEC_HUMAN	FALSE	101998632	40371448	112976064	47749380	105202592	46091372	0
sp|P52209-2|6PGD_HUMAN;tr|K7EM49|K7EM49_HUMAN;sp|P52209|6PGD_HUMAN;tr|K7EPF6|K7EPF6_HUMAN;tr|K7EMN2|K7EMN2_HUMAN	FALSE	26916282	8.36962e+06	20570978	7.16494e+06	24128124	10773181	0.00204918
sp|Q14847|LASP1_HUMAN;tr|C9J9W2|C9J9W2_HUMAN;sp|Q14847-2|LASP1_HUMAN	FALSE	50356828	25510276	51194976	25047512	52353888	21453432	0.00204918
sp|P32754-2|HPPD_HUMAN;sp|P32754|HPPD_HUMAN;tr|A0A0B4J1R4|A0A0B4J1R4_HUMAN	FALSE	203330000	98321696	211825936	81462456	209989504	114226984	0
tr|K7ELW0|K7ELW0_HUMAN;sp|Q99497|PARK7_HUMAN	FALSE	124391136	60981304	154442432	48392356	123149128	55909892	0
sp|P34897-3|GLYM_HUMAN;sp|P34897|GLYM_HUMAN	FALSE	28945806	9800377	31038092	15727483	32479542	13179603	0.00204918
sp|Q9Y2H6|FND3A_HUMAN;tr|G5E9X3|G5E9X3_HUMAN;sp|Q9Y2H6-2|FND3A_HUMAN	FALSE	17396506	2.12163e+06	5.03106e+06	0	521506432	3.84365e+06	0.00686948
tr|D6REM6|D6REM6_HUMAN;tr|A0A0R4J2E8|A0A0R4J2E8_HUMAN;sp|P43243|MATR3_HUMAN;tr|A8MXP9|A8MXP9_HUMAN	FALSE	14256762	6167671	13989644	6570531	12858282	7.236e+06	0
tr|H0YNB8|H0YNB8_HUMAN;tr|H0YKN4|H0YKN4_HUMAN	FALSE	138773520	79108600	148560144	65488508	150734832	64101804	0
tr|E7EQR6|E7EQR6_HUMAN	FALSE	104157176	62880324	110441224	45377112	102107512	43580016	0
sp|P07355|ANXA2_HUMAN;tr|H0YMU9|H0YMU9_HUMAN;tr|H0YMD0|H0YMD0_HUMAN;tr|H0YN42|H0YN42_HUMAN;sp|P07355-2|ANXA2_HUMAN	FALSE	106349792	48358812	112711872	53923012	107568712	57092028	0
tr|Q5T7C4|Q5T7C4_HUMAN	FALSE	156006592	71463800	134423776	45578880	137923728	66556128	0
sp|P30050|RL12_HUMAN	FALSE	239962496	119877056	249276576	86666520	251669296	113136248	0
tr|E7EP32|E7EP32_HUMAN;tr|C9JXA5|C9JXA5_HUMAN;tr|C9JIS1|C9JIS1_HUMAN;sp|Q9HAV0|GBB4_HUMAN;tr|H7C5J5|H7C5J5_HUMAN;tr|C9JZN1|C9JZN1_HUMAN;sp|P62879|GBB2_HUMAN;sp|P62879-2|GBB2_HUMAN	FALSE	51425488	22886064	55569760	28909546	45523604	25882668	0
tr|A0A024R4M0|A0A024R4M0_HUMAN;sp|P46781|RS9_HUMAN	FALSE	67358984	38502100	76644808	31201476	66960832	26447892	0
tr|C9JZR7|C9JZR7_HUMAN;tr|C9JUM1|C9JUM1_HUMAN	FALSE	69717416	35250096	70558808	28868164	65725116	22755610	0
sp|Q9HB71-3|CYBP_HUMAN	FALSE	253610496	129078016	258121440	60861720	242765648	57934436	0.00132275
tr|I3L303|I3L303_HUMAN;tr|H3BT37|H3BT37_HUMAN;tr|H3BV27|H3BV27_HUMAN	FALSE	151752384	54725128	255691152	81231808	189825472	185651840	0
sp|P62266|RS23_HUMAN	FALSE	136401376	66052192	133502584	56854128	134450304	56886556	0
sp|P12956-2|XRCC6_HUMAN;sp|P12956|XRCC6_HUMAN;tr|B1AHC9|B1AHC9_HUMAN	FALSE	56657476	35025116	54465800	30616732	58795784	30120740	0
sp|Q9UII2|ATIF1_HUMAN	FALSE	2860231	1513370	3706634	1.22376e+06	3.21596e+06	1.79671e+06	0.00204918
tr|H0YAM7|H0YAM7_HUMAN	FALSE	77612520	35165568	69259672	13838287	60804996	30218672	0
sp|O00410-3|IPO5_HUMAN;tr|H0Y8C6|H0Y8C6_HUMAN;sp|O00410|IPO5_HUMAN;sp|O00410-2|IPO5_HUMAN	FALSE	16336628	10016562	20961080	11922551	20074802	8623528	0
sp|P38919|IF4A3_HUMAN;tr|I3L3H2|I3L3H2_HUMAN	FALSE	392200832	170252016	344068672	176646816	373091808	175842944	0
sp|P05455|LA_HUMAN	FALSE	75175688	43885980	68923512	37450192	61040868	22983322	0
tr|B4DNK4|B4DNK4_HUMAN	FALSE	518968352	252331344	554618176	295898560	527736000	262635968	0
tr|H0YB80|H0YB80_HUMAN;tr|B7Z2E6|B7Z2E6_HUMAN	FALSE	30754840	13053882	32173054	15585000	30366040	13168848	0
sp|P50454|SERPH_HUMAN;tr|E9PPV6|E9PPV6_HUMAN	FALSE	106198192	47430660	116466480	58645028	116748824	57237036	0.00132275
tr|H0YIV0|H0YIV0_HUMAN	FALSE	88577456	39380520	92812120	36888136	91102336	42995928	0
sp|P09104|ENOG_HUMAN;sp|P09104-2|ENOG_HUMAN	FALSE	312234912	157667696	319444032	130675544	293461376	140553568	0
sp|Q14978|NOLC1_HUMAN;sp|Q14978-3|NOLC1_HUMAN;tr|A0A0A0MRM9|A0A0A0MRM9_HUMAN;sp|Q14978-2|NOLC1_HUMAN	FALSE	53117096	23746240	48407840	19458080	41233152	21877086	0
sp|Q15907-2|RB11B_HUMAN;sp|Q15907|RB11B_HUMAN;sp|P62491|RB11A_HUMAN;tr|H3BMH2|H3BMH2_HUMAN;tr|H3BSC1|H3BSC1_HUMAN;tr|B4DQU5|B4DQU5_HUMAN;sp|P62491-2|RB11A_HUMAN	FALSE	52883672	29226570	56458548	14612221	44231656	16207711	0.00204918
sp|Q13148|TADBP_HUMAN;tr|G3V162|G3V162_HUMAN;tr|A0A1W2PNU8|A0A1W2PNU8_HUMAN;tr|K7EJM5|K7EJM5_HUMAN;tr|B1AKP7|B1AKP7_HUMAN;tr|A0A087WX29|A0A087WX29_HUMAN;tr|K7EN94|K7EN94_HUMAN;tr|A0A087X260|A0A087X260_HUMAN;tr|K7EJ99|K7EJ99_HUMAN;tr|A0A0A0N0M3|A0A0A0N0M3_HUMAN;tr|A0A087WYY0|A0A087WYY0_HUMAN;tr|A0A0A0MSV7|A0A0A0MSV7_HUMAN	FALSE	15290404	6292531	15423640	7672005	14763956	5837835	0.00204918
sp|P27797|CALR_HUMAN	FALSE	268971200	137437936	294002880	100233776	247798080	137183232	0
sp|P62424|RL7A_HUMAN	FALSE	150943920	71023808	158871056	65855516	146566800	69770096	0
sp|P0DN37|PAL4G_HUMAN;sp|A0A0B4J2A2|PAL4C_HUMAN	FALSE	65428880	115963688	57006360	112305632	47592564	1.256e+06	0.00302419
sp|Q15084-4|PDIA6_HUMAN;sp|Q15084|PDIA6_HUMAN;sp|Q15084-5|PDIA6_HUMAN;sp|Q15084-2|PDIA6_HUMAN;sp|Q15084-3|PDIA6_HUMAN	FALSE	357255616	165144992	349090592	154845808	321421504	149965136	0
sp|P57721-5|PCBP3_HUMAN;sp|P57721-4|PCBP3_HUMAN;tr|J3QT27|J3QT27_HUMAN;sp|P57721-2|PCBP3_HUMAN;sp|P57721-3|PCBP3_HUMAN;tr|E9PFP8|E9PFP8_HUMAN;sp|P57721|PCBP3_HUMAN	FALSE	50990412	21310432	51673776	23707900	44128316	20614772	0
tr|E5RI98|E5RI98_HUMAN	FALSE	1039376576	501558848	1063249472	423100672	1078052992	504318752	0
sp|P27824-3|CALX_HUMAN;sp|P27824|CALX_HUMAN;sp|P27824-2|CALX_HUMAN	FALSE	149022832	88617456	181940800	83559840	154150192	75310976	0
sp|Q99729-2|ROAA_HUMAN;tr|D6R9P3|D6R9P3_HUMAN;tr|D6RBZ0|D6RBZ0_HUMAN;sp|Q99729-3|ROAA_HUMAN;tr|D6RD18|D6RD18_HUMAN	FALSE	27302784	157121616	139357328	140930672	84372624	88468376	0
tr|F8VWR1|F8VWR1_HUMAN;tr|F8VZA3|F8VZA3_HUMAN;tr|F8VU16|F8VU16_HUMAN	FALSE	13882530	9984060	21822536	12321682	23756378	10998493	0
sp|P61604|CH10_HUMAN	FALSE	172383968	88306856	180559856	69523112	174886192	76205104	0
[truncated: 740 more rows]

## Sheet: DE_1vs4
ProteinGroup	Decoy	Quantity_1	Quantity_2	Quantity_3	Quantity_4	Quantity_5	Quantity_6	QValue
[truncated: 1,369 more rows]

[truncated: 5 more sheets: DE_1vs8, DE_1vs10, DE_1vs20, SILAC_1vs1, SILAC_1vs10]
